# Supplementary material for: Serotype-dependent adhesion of Shiga toxin-producing Escherichia coli to bovine milk fat globule membrane proteins
Source: Front Microbiol. 2022 Nov 24;13:1010665. doi: 10.3389/fmicb.2022.1010665 (PMC9731836; doi:10.3389/fmicb.2022.1010665)
Supplement: Supplementary file 1 [file Table_1.XLSX]

## Sheet: Supplementary Tables
Supplementary Tables
Table S1	STEC str. EDL933 surface proteins of identified by qualitative proteomics analysis.
Table S2	STEC str. 21765 surface proteins of identified by qualitative proteomics analysis.
Table S3	STEC str. PMK5 surface proteins of identified by qualitative proteomics analysis.
Table S4	Results of relative tandem mass tag (TMT) quantitative proteomics of three surface protein extracts from STEC strains EDL933, 21765 and PMK5.
Table S5	Uncharized DEPs proteins. The table groups DEPs that are at least 2 times more expressed (p-value < 0.05) in the strain 21765 and/or PMK5 and for which no GO term annotation were available.

## Sheet: Table S1
Protein FDR Confidence: Combined	Master	Accession	Description	Contaminant	Sum PEP Score	Coverage [%]	# Peptides	# PSMs	# Unique Peptides	# AAs	MW [kDa]	calc. pI	Score Sequest HT: Sequest HT	# Peptides (by Search Engine): Sequest HT	# Protein Groups
High	Master Protein	Q7DBI0	Flagellin OS=Escherichia coli O157:H7 OX=83334 GN=fliC PE=3 SV=1	FALSE	679.292	92	39	615	3	585	59.9	4.93	1452.99	39	1
High	Master Protein	A0A403PJD9	Flagellin OS=Escherichia coli OX=562 GN=D7Y10_06955 PE=3 SV=1	FALSE	588.758	85	35	547	1	585	60	4.97	1308.99	35	1	57 59
High	Master Protein	A0A6L9BYX8	Flagellin FliC (Fragment) OS=Escherichia coli OX=562 GN=GUB95_27920 PE=4 SV=1	FALSE	363.321	78	23	343	1	396	40.3	4.96	785.92	23	1
High	Master Protein	A0A7B4KCG4	Chaperone protein DnaK OS=Escherichia coli OX=562 GN=dnaK PE=2 SV=1	FALSE	312.058	69	34	79	34	638	69.1	4.97	176.67	34	1
High	Master Protein	A0A6G6KVW9	Enolase OS=Escherichia coli OX=562 GN=eno PE=3 SV=1	FALSE	278.959	73	19	76	1	432	45.7	5.4	193.09	19	1
High	Master Protein	A0A5P1Q2J6	Elongation factor G OS=Escherichia coli OX=562 GN=fusA PE=3 SV=1	FALSE	276.658	55	26	87	26	704	77.5	5.38	194.99	26	1
High	Master Protein	A0A6N9S2P9	Elongation factor Ts OS=Escherichia coli OX=562 GN=tsf PE=3 SV=1	FALSE	274.548	86	22	153	2	283	30.4	5.29	341.32	22	1
High	Master Protein	A0A399VL82	Outer membrane protein assembly factor BamC OS=Escherichia coli OX=562 GN=bamC PE=3 SV=1	FALSE	273.073	85	17	83	1	344	36.8	5.57	211.9	17	1
High	Master Protein	F4T4B5	Enolase OS=Escherichia coli M605 OX=656417 GN=eno PE=3 SV=1	FALSE	263.523	73	19	75	1	432	45.7	5.48	184.91	19	1
High	Master Protein	A0A070FG57	Glycerophosphodiester phosphodiesterase OS=Escherichia coli O128:H2 str. 2011C-3317 OX=1446581 GN=glpQ PE=4 SV=1	FALSE	261.717	66	19	69	19	358	40.8	5.83	165.35	19	1
High	Master Protein	D7ZI93	Outer membrane protein assembly factor BamC OS=Escherichia coli MS 69-1 OX=749531 GN=bamC PE=3 SV=1	FALSE	259.481	82	17	74	1	344	36.8	5.57	209.29	17	1
High	Master Protein	lcl	[locus_tag=EDL933_4130] [db_xref=GO:0004618] [protein=Phosphoglycerate kinase] [protein_id=AIG70283.1] [location=complement(3896561..3897724)] [gbkey=CDS]	FALSE	259.254	74	21	75	21	387	41.1	5.22	184.28	21	1
High	Master Protein	A0A3H9FL61	Elongation factor Ts OS=Escherichia coli OX=562 GN=tsf PE=3 SV=1	FALSE	257.565	87	22	130	2	283	30.4	5.29	267.09	22	1
High	Master Protein	A0A3Y1QZA3	60 kDa chaperonin OS=Escherichia coli OX=562 GN=groL PE=3 SV=1	FALSE	254.498	59	24	84	9	548	57.3	4.94	182.61	24	1
High	Master Protein	A0A3A1QBJ8	Flagellin OS=Escherichia coli OX=562 GN=FV438_01580 PE=3 SV=1	FALSE	253.263	32	17	244	2	670	68.1	4.73	588.8	17	1
High	Master Protein	F4SLJ3	Glutamine-binding periplasmic protein (GlnBP) OS=Escherichia coli H736 OX=656414 GN=ECHG_00585 PE=3 SV=1	FALSE	232.209	65	15	105	5	248	27.2	8.1	251.3	15	1
High	Master Protein	A0A029IPZ1	Cysteine synthase OS=Escherichia coli 2-005-03_S4_C2 OX=1444228 GN=cysK PE=3 SV=1	FALSE	224.363	73	15	55	15	323	34.5	5.81	156.34	15	1
High	Master Protein	A0A4Y8A929	Glutamate decarboxylase OS=Escherichia coli OX=562 GN=E2112_10240 PE=3 SV=1	FALSE	223.977	62	19	68	3	466	52.7	5.49	144.12	19	1
High	Master Protein	A0A6M9WPE7	Cystine ABC transporter substrate-binding protein OS=Escherichia coli OX=562 GN=tcyJ PE=3 SV=1	FALSE	222.287	69	23	78	19	343	37.2	7.25	206.59	23	1
High	Master Protein	A0A2Y0TBT9	Maltodextrin-binding protein OS=Escherichia coli OX=562 GN=malE PE=3 SV=1	FALSE	215.654	64	21	81	10	396	43.4	5.71	197.94	21	1
High	Master Protein	lcl	[locus_tag=EDL933_3381] [protein=Outer membrane protein C precursor] [protein_id=AIG69547.1] [location=complement(3132952..3134055)] [gbkey=CDS]	FALSE	213.741	80	21	85	21	367	40.5	4.78	196.63	21	1
High	Master Protein	A0A0B1MQ83	ATP synthase subunit alpha OS=Escherichia coli OX=562 GN=atpA PE=3 SV=1	FALSE	207.553	59	23	67	14	513	55.1	5.96	151.98	23	1
High	Master Protein	A0A163CXN4	ATP synthase subunit beta OS=Escherichia coli OX=562 GN=atpD PE=3 SV=1	FALSE	206.873	70	20	57	20	460	50.3	5.01	131.72	20	1
High	Master Protein	A0A2R9W0W3	Glutamate decarboxylase (Fragment) OS=Escherichia coli OX=562 GN=C4K41_27465 PE=3 SV=1	FALSE	206.04	53	15	57	1	423	47.7	5.44	132.61	15	1
High	Master Protein	A1Z1Z5	Flagellin (Fragment) OS=Escherichia coli OX=562 GN=fllA55 PE=3 SV=1	FALSE	200.565	25	12	201	1	608	62.3	4.84	507.89	12	1
High	Master Protein	A0A3W4K7I4	GTP-binding protein (Fragment) OS=Escherichia coli OX=562 GN=EAX79_29040 PE=4 SV=1	FALSE	198.15	87	12	57	4	219	24.1	4.88	139.42	12	1
High	Master Protein	C3TPR4	Periplasmic serine endoprotease DegP-like OS=Escherichia coli OX=562 GN=degP PE=3 SV=1	FALSE	189.665	59	19	54	2	474	49.3	8.56	126.4	19	1
High	Master Protein	A0A0H2YZI9	Glyceraldehyde-3-phosphate dehydrogenase OS=Escherichia coli O1:K1 / APEC OX=405955 GN=gapA PE=3 SV=1	FALSE	185.166	80	20	82	19	334	35.9	6.8	166.67	20	1
High	Master Protein	A0A074I9L3	Transaldolase OS=Escherichia coli 1-392-07_S4_C1 OX=1444219 GN=tal PE=3 SV=1	FALSE	184.094	75	21	48	19	317	35.2	5.21	135.7	21	1
High	Master Protein	A0A3K4WPH0	Vitamin B12 transporter BtuB OS=Escherichia coli OX=562 GN=btuB PE=3 SV=1	FALSE	183.151	65	26	45	26	614	68.3	5.67	101.75	26	1
High	Master Protein	A0A024L4C3	Outer membrane protein A OS=Escherichia coli OX=562 GN=ompA PE=3 SV=1	FALSE	181.888	53	17	149	11	365	39.6	6.71	308.75	17	1
High	Master Protein	Q9S4M0	Flagellin (Fragment) OS=Escherichia coli OX=562 GN=fliC PE=3 SV=1	FALSE	181.84	28	12	134	2	517	53	4.78	320.21	12	1
High	Master Protein	A0A0A0F4K3	Periplasmic serine endoprotease DegP-like OS=Escherichia coli G3/10 OX=1455601 GN=EL76_3864 PE=3 SV=1	FALSE	173.016	56	18	51	1	474	49.3	8.28	113.36	18	1
High	Master Protein	A0A1X3IEA9	Thiol:disulfide interchange protein DsbA OS=Escherichia coli E1114 OX=550691 GN=EADG_04238 PE=3 SV=1	FALSE	171.15	81	10	59	1	150	16.6	7.39	145.52	10	1
High	Master Protein	A0A3R1A451	Malate dehydrogenase OS=Escherichia coli OX=562 GN=mdh PE=3 SV=1	FALSE	170.738	88	18	47	10	312	32.3	5.54	114.77	18	1
High	Master Protein	A0A0H2UL03	Thiol:disulfide interchange protein OS=Escherichia coli (strain B / BL21-DE3) OX=469008 PE=1 SV=1	FALSE	170.292	64	10	59	1	189	21.1	5.63	145.08	10	1
High	Master Protein	A0A080J8U0	Protein UshA OS=Escherichia coli 1-250-04_S3_C2 OX=1444163 GN=ushA PE=3 SV=1	FALSE	166.086	44	16	39	16	550	60.6	5.71	105.49	16	1
High	Master Protein	A0A6C9SXV5	Dihydrolipoyl dehydrogenase OS=Escherichia coli OX=562 GN=lpdA PE=3 SV=1	FALSE	162.236	49	16	45	16	474	50.6	6.15	104.54	16	1
High	Master Protein	A0A5F1UIK3	Glutamate decarboxylase (Fragment) OS=Escherichia coli OX=562 GN=E5S61_23115 PE=3 SV=1	FALSE	161.018	54	12	37	1	347	38.9	5.59	83.78	12	1
High	Master Protein	lcl	[locus_tag=EDL933_1170] [db_xref=GO:0004648] [protein=Phosphoserine aminotransferase] [protein_id=AIG67365.1] [location=1174628..1175716] [gbkey=CDS]	FALSE	160.685	65	16	38	16	362	39.8	5.74	91.85	16	1
High	Master Protein	C3SV20	Periplasmic L-asparaginase II OS=Escherichia coli OX=562 GN=ECs3833 PE=3 SV=1	FALSE	160	52	14	49	2	348	36.8	6.38	109.55	14	1
High	Master Protein	A0A3A6SG42	Acetate kinase OS=Escherichia coli OX=562 GN=ackA PE=3 SV=1	FALSE	158.59	57	13	36	13	400	43.3	6.28	92.92	13	1
High	Master Protein	Q9L9M3	Flagellin OS=Escherichia coli OX=562 GN=fliC PE=3 SV=1	FALSE	154.645	34	10	129	1	420	44.2	5.08	321.22	10	1
High	Master Protein	A0A426PRQ7	Oligopeptide ABC transporter substrate-binding protein OppA OS=Escherichia coli OX=562 GN=oppA PE=3 SV=1	FALSE	154.428	54	20	40	19	543	61	6.37	108.76	20	1
High	Master Protein	A0A5E9SB53	L-asparaginase 2 (Fragment) OS=Escherichia coli OX=562 GN=ansB PE=3 SV=1	FALSE	152.912	49	12	45	1	326	34.6	6.38	107.8	12	1
High	Master Protein	E9XM72	Aldehyde-alcohol dehydrogenase OS=Escherichia coli TW10509 OX=656449 GN=ERFG_02192 PE=3 SV=1	FALSE	151.706	41	26	38	26	891	96.1	6.79	83.18	26	1
High	Master Protein	A0A2W6P0D8	Glutamine ABC transporter substrate-binding protein GlnH (Fragment) OS=Escherichia coli OX=562 GN=DNQ45_27055 PE=4 SV=1	FALSE	151.266	69	12	90	2	175	19.2	8.91	204.59	12	1
High	Master Protein	A0A0K4GKI0	Glutamate decarboxylase OS=Escherichia coli OX=562 GN=gadB PE=3 SV=1	FALSE	150.254	52	15	55	1	430	48.6	5.38	103.88	15	1
High	Master Protein	B7NCH9	D-galactose-binding periplasmic protein OS=Escherichia coli O17:K52:H18 (strain UMN026 / ExPEC) OX=585056 GN=mglB PE=3 SV=1	FALSE	146.239	71	19	45	19	332	35.7	6.02	102.79	19	1
High	Master Protein	A0A6M0PGA3	60 kDa chaperonin OS=Escherichia coli OX=562 GN=groL PE=3 SV=1	FALSE	145.53	39	16	53	1	548	57.1	4.94	115.97	16	1
High	Master Protein	A0A070UZA9	Thiosulfate-binding protein OS=Escherichia coli 2-177-06_S3_C2 OX=1444151 GN=cysP PE=3 SV=1	FALSE	144.812	64	19	46	11	338	37.6	8.53	115.47	19	1
High	Master Protein	A0A3T9E4X1	Outer membrane protein assembly factor BamA OS=Escherichia coli OX=562 GN=bamA PE=3 SV=1	FALSE	143.059	43	24	42	24	810	90.5	5.12	86.29	24	1
High	Master Protein	A0A454A9S6	Thiol:disulfide interchange protein OS=Escherichia coli O6:K15:H31 (strain 536 / UPEC) OX=362663 GN=ECP_4070 PE=3 SV=1	FALSE	142.601	50	9	57	1	208	23.1	6.34	133.83	9	1
High	Master Protein	A0A2W6Q9I3	Maltodextrin-binding protein (Fragment) OS=Escherichia coli OX=562 GN=DNQ45_09415 PE=3 SV=1	FALSE	142.434	65	12	53	1	242	26.4	5.24	121.87	12	1
High	Master Protein	A0A0K3X297	Adhesin OS=Escherichia coli OX=562 GN=flu_1 PE=4 SV=1	FALSE	140.133	35	18	42	18	929	95.4	5.59	88.55	18	1
High	Master Protein	F4TIW2	Chaperone protein ClpB OS=Escherichia coli M718 OX=656419 GN=clpB PE=3 SV=1	FALSE	139.042	36	25	41	25	861	95.9	5.48	92.83	25	1
High	Master Protein	Q6VMV4	Flagellin OS=Escherichia coli OX=562 GN=fliC PE=3 SV=1	FALSE	137.83	29	9	129	1	426	44.1	4.6	307.16	9	1
High	Master Protein	A0A6M7H5F6	Arginine ABC transporter substrate-binding protein OS=Escherichia coli O157:H7 OX=83334 GN=E3158_18540 PE=3 SV=1	FALSE	136.176	70	13	50	13	243	26.8	6.6	89.84	13	1
High	Master Protein	A0A7I8Y4F2	SlyB protein OS=Escherichia coli OX=562 GN=slyB PE=4 SV=1	FALSE	133.605	70	6	102	1	155	15.6	9.31	272.12	6	1
High	Master Protein	A0A7U9M2B0	Periplasmic L-asparaginase 2 OS=Escherichia coli O145:H28 OX=1078034 GN=ansB PE=4 SV=1	FALSE	133.402	45	12	39	1	348	36.8	6.38	91.21	12	1
High	Master Protein	M9HFG5	Purine nucleoside phosphorylase DeoD-type OS=Escherichia coli MP021561.2 OX=1116136 GN=deoD PE=3 SV=1	FALSE	133.145	70	14	41	14	239	25.9	5.66	97.72	14	1
High	Master Protein	lcl	[locus_tag=EDL933_1699] [protein=ABC transporter, periplasmic spermidine putrescine-binding protein PotD] [protein_id=AIG67887.1] [location=complement(1627363..1628409)] [gbkey=CDS]	FALSE	132.63	60	15	55	15	348	38.8	5.39	107.79	15	1
High	Master Protein	A0A4C9BVH3	D-ribose transporter subunit RbsB OS=Escherichia coli OX=562 GN=rbsB_1 PE=4 SV=1	FALSE	131.628	63	13	42	13	296	30.9	7.47	87.43	13	1
High	Master Protein	A0A2J1BW82	Chaperone protein HtpG OS=Escherichia coli OX=562 GN=htpG PE=3 SV=1	FALSE	131.202	42	21	39	21	624	71.4	5.21	76.18	21	1
High	Master Protein	A0A1Q9L2K1	Deoxyribose-phosphate aldolase OS=Escherichia coli OX=562 GN=deoC PE=3 SV=1	FALSE	129.528	64	14	36	14	259	27.8	5.73	89.24	14	1
High	Master Protein	E2QMK5	Membrane protein OS=Escherichia coli OX=562 GN=slyB PE=4 SV=1	FALSE	129.035	48	6	102	1	155	15.6	8.84	269.22	6	1
High	Master Protein	A0A2S8JSC9	Superoxide dismutase OS=Escherichia coli OX=562 GN=sodB PE=3 SV=1	FALSE	127.444	81	9	42	9	193	21.3	5.95	98.02	9	1
High	Master Protein	E1J4G0	Pyruvate kinase OS=Escherichia coli MS 124-1 OX=679205 GN=pyk PE=3 SV=1	FALSE	125.666	46	20	38	20	542	58.7	7.11	87.32	20	1
High	Master Protein	Q1RF64	Nucleoid-associated protein YbaB OS=Escherichia coli (strain UTI89 / UPEC) OX=364106 GN=ybaB PE=3 SV=1	FALSE	123.967	72	6	31	6	114	12.6	5.29	78.47	6	1
High	Master Protein	A0A454A8J3	Peptidyl-prolyl cis-trans isomerase OS=Escherichia coli O6:K15:H31 (strain 536 / UPEC) OX=362663 GN=ECP_3437 PE=3 SV=1	FALSE	123.943	57	13	49	13	270	28.9	8.47	118.1	13	1
High	Master Protein	D3QN42	Serine hydroxymethyltransferase OS=Escherichia coli O55:H7 (strain CB9615 / EPEC) OX=701177 GN=glyA PE=3 SV=1	FALSE	120.239	46	15	35	15	417	45.3	6.6	82.75	15	1
High	Master Protein	P76177	Protein YdgH OS=Escherichia coli (strain K12) OX=83333 GN=ydgH PE=1 SV=1	FALSE	118.751	60	15	36	15	314	33.9	9.28	91.13	15	1
High	Master Protein	A0A4D1KG00	Serine protease EspP OS=Escherichia coli OX=562 GN=espP_3 PE=4 SV=1	FALSE	118.645	16	13	34	13	1299	141.3	7.11	70.14	13	1
High	Master Protein	F4V0D4	Formate C-acetyltransferase OS=Escherichia coli TA280 OX=656444 GN=ECNG_04442 PE=3 SV=1	FALSE	117.833	33	17	31	17	760	85.3	6.01	71.35	17	1
High	Master Protein	C3SS47	Glyoxalase OS=Escherichia coli OX=562 GN=ECs4088 PE=3 SV=1	FALSE	117.634	56	6	20	6	220	23.4	4.84	67.6	6	1
High	Master Protein	A0A6D0UNK9	Elongation factor Tu (Fragment) OS=Escherichia coli OX=562 GN=tuf PE=3 SV=1	FALSE	115.628	42	10	40	1	360	39.5	4.94	95.74	10	1
High	Master Protein	A0A140N7U4	6-phosphogluconate dehydrogenase, decarboxylating OS=Escherichia coli (strain B / BL21-DE3) OX=469008 GN=ECBD_1630 PE=3 SV=1	FALSE	114.475	58	19	27	1	468	51.5	5.07	73.28	19	1
High	Master Protein	A0A193LUQ4	Histidine ABC transporter substrate-binding protein HisJ OS=Escherichia coli OX=562 GN=GJ11_15480 PE=3 SV=1	FALSE	114.266	64	13	22	8	260	28.5	5.44	52.22	13	1
High	Master Protein	A0A1M0LXL8	Flagellin OS=Escherichia coli OX=562 GN=fliC_2 PE=3 SV=1	FALSE	112.795	31	10	108	2	443	46.4	4.75	250.62	10	1
High	Master Protein	A0A6D0SJ33	Transketolase OS=Escherichia coli OX=562 GN=tkt PE=3 SV=1	FALSE	111.893	36	17	32	15	663	72.1	5.73	72.41	17	1
High	Master Protein	A0A5F1DVD8	DNA-binding protein OS=Escherichia coli OX=562 GN=hns PE=3 SV=1	FALSE	111.472	61	9	51	9	137	15.5	5.47	112.77	9	1
High	Master Protein	A0A3J1YUM9	Attaching and effacing protein OS=Escherichia coli OX=562 GN=eae PE=3 SV=1	FALSE	111.034	27	16	35	13	934	101.8	8.63	81.09	16	1
High	Master Protein	A0A6G3HLR4	Periplasmic serine endoprotease DegP-like (Fragment) OS=Escherichia coli OX=562 GN=degP PE=3 SV=1	FALSE	110.65	53	14	38	1	360	37.5	8.9	76.94	14	1
High	Master Protein	A0A4C3FYN3	Beta-barrel assembly-enhancing protease OS=Escherichia coli OX=562 GN=bepA PE=3 SV=1	FALSE	109.376	40	11	18	11	487	53.9	7.68	54.45	11	1
High	Master Protein	lcl	[locus_tag=EDL933_0025] [db_xref=GO:0004822] [protein=Isoleucyl-tRNA synthetase] [protein_id=AIG66233.1] [location=26803..29619] [gbkey=CDS]	FALSE	108.547	32	22	28	22	938	104.3	5.95	63.63	22	1
High	Master Protein	A0A1X3KCP9	6-phosphogluconate dehydrogenase, decarboxylating OS=Escherichia coli H461 OX=656403 GN=EARG_00846 PE=3 SV=1	FALSE	108.004	58	19	27	1	468	51.4	5.2	68	19	1
High	Master Protein	A0A7U9AVC1	Peroxiredoxin OS=Escherichia coli TA206 OX=656440 GN=ECKG_00441 PE=4 SV=1	FALSE	106.364	64	13	62	13	187	20.8	5.17	92.81	13	1
High	Master Protein	A0A1X3LK76	2-dehydro-3-deoxy-phosphogluconate aldolase OS=Escherichia coli TA054 OX=656433 GN=EAXG_01372 PE=3 SV=1	FALSE	106.125	81	11	27	11	213	22.2	5.39	61.27	11	1
High	Master Protein	H4LBB9	Thiol peroxidase OS=Escherichia coli DEC2E OX=868142 GN=tpx PE=3 SV=1	FALSE	105.052	74	7	18	7	168	17.8	5.24	50.14	7	1
High	Master Protein	A0A4Q8DW18	Thiol:disulfide interchange protein OS=Escherichia coli OX=562 GN=dsbA PE=3 SV=1	FALSE	104.535	50	8	40	1	208	23.1	6.34	84.4	8	1
High	Master Protein	F4T849	Putative endoribonuclease L-PSP OS=Escherichia coli M605 OX=656417 GN=ECIG_03185 PE=3 SV=1	FALSE	103.639	70	6	32	5	141	15.2	6.11	79.56	6	1
High	Master Protein	lcl	[locus_tag=EDL933_2746] [protein=MltA-interacting protein MipA] [protein_id=AIG68918.1] [location=complement(2561793..2562539)] [gbkey=CDS]	FALSE	103.614	58	8	26	8	248	27.8	5.85	75.41	8	1
High	Master Protein	F4NHG1	Isocitrate dehydrogenase [NADP] OS=Escherichia coli D9 OX=556266 GN=icd PE=4 SV=1	FALSE	101.824	41	13	24	13	416	45.7	5.33	58.72	13	1
High	Master Protein	D7ZCV4	L-asparaginase, type II OS=Escherichia coli MS 69-1 OX=749531 GN=HMPREF9534_02063 PE=4 SV=1	FALSE	100.96	58	9	29	1	206	22	8.25	63.66	9	1
High	Master Protein	A0A7U9BEV6	Molybdate ABC transporter, periplasmic molybdate-binding protein OS=Escherichia coli TA271 OX=656443 GN=ECLG_03768 PE=4 SV=1	FALSE	100.544	68	14	39	14	257	27.4	7.47	71.7	14	1
High	Master Protein	Q8XB46	Hyperosmotically inducible periplasmic protein OS=Escherichia coli O157:H7 OX=83334 GN=osmY PE=4 SV=2	FALSE	99.961	52	8	44	2	201	21.1	6.37	122.7	8	1
High	Master Protein	lcl	[locus_tag=EDL933_1860] [protein=Protease VII (Omptin) precursor] [protein_id=AIG68048.1] [location=complement(1746753..1747706)] [gbkey=CDS]	FALSE	99.939	64	17	36	17	317	35.6	5.78	81.79	17	1
High	Master Protein	Q83XM5	Flagellin OS=Escherichia coli OX=562 GN=fliC PE=3 SV=1	FALSE	97.867	35	9	110	1	349	36.3	5.25	245.92	9	1
High	Master Protein	D7ZCG8	Tol-pal system protein YbgF (Fragment) OS=Escherichia coli MS 69-1 OX=749531 GN=ygbF PE=3 SV=1	FALSE	97.457	84	13	27	13	225	24.4	7.23	60.14	13	1
High	Master Protein	A0A0K3W6E5	Peptidoglycan-associated protein OS=Escherichia coli OX=562 GN=pal PE=3 SV=1	FALSE	96.416	68	7	26	7	173	18.8	6.8	74.09	7	1
High	Master Protein	A0A5E8M1W1	Glutamate decarboxylase (Fragment) OS=Escherichia coli OX=562 GN=D9F32_09840 PE=4 SV=1	FALSE	96.39	82	8	27	1	116	13.2	5.27	74.43	8	1
High	Master Protein	A0A7L5L2Z2	Thiol:disulfide interchange protein OS=Escherichia coli OX=562 GN=dsbC PE=3 SV=1	FALSE	96.354	54	7	30	2	236	25.6	6.79	66.94	7	1
High	Master Protein	A0A478GYP6	Co-chaperone YbbN OS=Escherichia coli OX=562 GN=ybbN PE=4 SV=1	FALSE	96.193	61	10	17	10	284	31.8	4.59	58.77	10	1
High	Master Protein	A0A3W2Y9Z8	Amino acid ABC transporter substrate-binding protein OS=Escherichia coli OX=562 GN=D6X76_10810 PE=4 SV=1	FALSE	96.115	52	12	30	12	302	33.4	8.53	61.73	12	1
High	Master Protein	A0A376Q3N1	DUF3313 domain-containing protein OS=Escherichia coli OX=562 GN=DL637_17630 PE=4 SV=1	FALSE	95.748	60	10	24	10	222	24.4	7.91	62.39	10	1
High	Master Protein	lcl	[locus_tag=EDL933_3581] [db_xref=GO:0008982] [protein=PTS system, glucose-specific IIA component] [protein_id=AIG69741.1] [location=3347116..3347625] [gbkey=CDS]	FALSE	95.21	63	7	56	7	169	18.3	4.84	121.75	7	1
High	Master Protein	A0A3K0QIJ6	Phosphate-binding protein PstS OS=Escherichia coli OX=562 GN=pstS PE=3 SV=1	FALSE	94.528	58	17	29	17	346	37	8.47	60.75	17	1
High	Master Protein	V0SM18	Uridine phosphorylase OS=Escherichia coli 907672 OX=1268982 GN=HMPREF1595_01764 PE=3 SV=1	FALSE	94.077	71	11	24	11	254	27.3	6.43	61.41	11	1
High	Master Protein	C3SDV5	LPS-assembly protein LptD OS=Escherichia coli OX=562 GN=lptD PE=3 SV=1	FALSE	94.061	35	18	21	18	784	89.6	5.16	54.9	18	1
High	Master Protein	D3GXT1	Putative organic solvent tolerance protein OS=Escherichia coli O44:H18 (strain 042 / EAEC) OX=216592 GN=EC042_3482 PE=4 SV=1	FALSE	93.989	58	9	30	9	211	23.9	9.36	61.92	9	1
High	Master Protein	A0A161QWB8	Adenylosuccinate synthetase OS=Escherichia coli OX=562 GN=purA PE=3 SV=1	FALSE	93.726	46	15	25	2	432	47.3	5.49	57.67	15	1
High	Master Protein	A0A6G4BPS2	Ribosome-associated translation inhibitor RaiA OS=Escherichia coli OX=562 GN=raiA PE=4 SV=1	FALSE	93.155	60	5	47	5	113	12.8	7.06	90.21	5	1
High	Master Protein	A0A771GZ87	Elongation factor Tu (Fragment) OS=Escherichia coli OX=562 GN=HH129_24200 PE=4 SV=1	FALSE	92.928	77	8	31	1	142	15.8	4.44	74.17	8	1
High	Master Protein	A0A193LPU1	Porin OS=Escherichia coli OX=562 GN=GJ11_05150 PE=3 SV=1	FALSE	92.804	57	13	29	4	361	39.2	4.96	71.24	13	1
High	Master Protein	A0A5C9APX5	Peptidylprolyl isomerase (Fragment) OS=Escherichia coli OX=562 GN=ppiD PE=4 SV=1	FALSE	92.758	38	18	29	18	592	64.8	5.03	68.58	18	1
High	Master Protein	A0A7I8Y789	30S ribosomal protein S1 OS=Escherichia coli OX=562 GN=rpsA PE=3 SV=1	FALSE	91.897	43	18	26	18	557	61	5	57.89	18	1
High	Master Protein	A0A4S1UEN8	Outer membrane protein X OS=Escherichia coli OX=562 GN=ompX PE=3 SV=1	FALSE	90.825	53	8	30	8	171	18.6	8.03	75.33	8	1
High	Master Protein	A0A193LMB8	Chaperone protein Skp OS=Escherichia coli OX=562 GN=GJ11_00930 PE=3 SV=1	FALSE	90.692	48	6	45	1	161	17.7	9.7	126.6	6	1
High	Master Protein	A0A023Z3Y5	Penicillin-binding protein activator LpoA OS=Escherichia coli O145:H28 (strain RM12581) OX=1248823 GN=yraM PE=3 SV=1	FALSE	90.349	41	18	29	18	678	72.8	5.52	58.4	18	1
High	Master Protein	A0A7U5DLY6	Rare lipoprotein A OS=Escherichia coli OX=562 GN=BFL24_03605 PE=4 SV=1	FALSE	88.787	48	10	26	10	362	37.6	6.21	64.44	10	1
High	Master Protein	D7Y8S5	Lactaldehyde reductase OS=Escherichia coli (strain MS 115-1) OX=749537 GN=fucO PE=4 SV=1	FALSE	88.787	39	10	17	10	383	40.6	5.44	49.37	10	1
High	Master Protein	A0A366YBF7	Glutamate-1-semialdehyde 2,1-aminomutase OS=Escherichia coli OX=562 GN=hemL PE=3 SV=1	FALSE	87.706	43	13	27	4	426	45.4	4.86	64.18	13	1
High	Master Protein	A0A271QQA2	C-lysozyme inhibitor OS=Escherichia coli OX=562 GN=ivy PE=3 SV=1	FALSE	87.23	69	7	33	7	157	16.9	6.77	57.45	7	1
High	Master Protein	A0A377LAN5	Peptidyl-prolyl cis-trans isomerase OS=Escherichia coli OX=562 GN=ppiA PE=3 SV=1	FALSE	87.124	59	8	21	1	186	20.1	8.85	52.41	8	1
High	Master Protein	A0A2I6LPF2	50S ribosomal protein L7/L12 OS=Escherichia coli OX=562 GN=rplL PE=3 SV=1	FALSE	86.777	57	8	45	1	122	12.4	4.65	125.96	8	1
High	Master Protein	A0A7U2W516	ACP S-malonyltransferase OS=Escherichia coli O84:H7 OX=2697517 GN=fabD PE=4 SV=1	FALSE	85.988	45	8	17	8	309	32.4	5.03	45.86	8	1
High	Master Protein	A0A7J4WQ05	Osmotically-inducible lipoprotein OsmB OS=Escherichia coli OX=562 GN=osmB PE=4 SV=1	FALSE	85.291	58	2	8	2	72	6.9	9.74	48.09	2	1
High	Master Protein	sp	ALBU_BOVIN	TRUE	85.077	26	17	38	14	607	69.2	6.18	82.69	17	1
High	Master Protein	A0A1X3LD21	Acid stress chaperone HdeA OS=Escherichia coli TA054 OX=656433 GN=hdeA PE=3 SV=1	FALSE	84.436	55	2	95	1	110	11.9	5.25	308.89	2	1
High	Master Protein	A0A444R4Y5	Molecular chaperone OsmY (Fragment) OS=Escherichia coli OX=562 GN=osmY PE=4 SV=1	FALSE	84.233	52	7	38	1	173	18.2	5.67	98.65	7	1
High	Master Protein	A0A1X3LHT6	Glucose-1-phosphatase (G1Pase) OS=Escherichia coli TA054 OX=656433 GN=EAXG_00401 PE=4 SV=1	FALSE	83.891	49	14	30	14	413	45.6	5.74	59.39	14	1
High	Master Protein	A0A6M0PV20	ATP synthase subunit alpha OS=Escherichia coli OX=562 GN=atpA PE=3 SV=1	FALSE	83.328	23	10	23	1	513	55.2	5.59	52.6	10	1
High	Master Protein	E1J5I6	DNA protection during starvation protein OS=Escherichia coli MS 124-1 OX=679205 GN=dps PE=3 SV=1	FALSE	83.151	50	9	32	9	208	23.2	6.05	54.26	9	1
High	Master Protein	A0A3J1EKD5	DUF2756 family protein OS=Escherichia coli OX=562 GN=ED648_11710 PE=4 SV=1	FALSE	82.598	68	7	34	1	146	16.6	10.89	62.96	7	1
High	Master Protein	J7QRU0	Protein chain elongation factor EF-Tu OS=Escherichia coli chi7122 OX=475609 GN=tufA PE=4 SV=1	FALSE	82.536	50	8	48	1	206	22.6	5.73	92.39	8	1
High	Master Protein	Q5MDC2	Malate dehydrogenase (Fragment) OS=Escherichia coli OX=562 GN=mdh PE=3 SV=1	FALSE	82.476	62	8	19	2	161	16.7	6.55	48.69	8	1
High	Master Protein	A0A2W6PV85	Nucleoside-specific channel-forming protein Tsx OS=Escherichia coli OX=562 GN=DNQ45_27140 PE=3 SV=1	FALSE	82.049	40	7	25	7	294	33.6	5.21	66.62	7	1
High	Master Protein	A0A786ZMQ2	50S ribosomal protein L1 OS=Escherichia coli OX=562 GN=rplA PE=3 SV=1	FALSE	82.028	48	10	18	10	234	24.7	9.64	43.76	10	1
High	Master Protein	lcl	[locus_tag=EDL933_2137] [protein=mannose-specific adhesin FimH] [protein_id=AIG68325.1] [location=1986806..1987720] [gbkey=CDS]	FALSE	81.84	54	10	21	10	304	32	8.12	54.75	10	1
High	Master Protein	F4NQ82	2,3-bisphosphoglycerate-independent phosphoglycerate mutase OS=Escherichia coli D9 OX=556266 GN=gpmI PE=3 SV=1	FALSE	81.64	36	12	23	1	523	57.1	5.25	52.59	12	1
High	Master Protein	A0A4Y9WRS7	Adenylosuccinate synthetase OS=Escherichia coli OX=562 GN=purA PE=3 SV=1	FALSE	81.557	42	14	23	1	432	47.4	5.49	50.31	14	1
High	Master Protein	A0A369FG97	Outer membrane protein assembly factor BamB OS=Escherichia coli OX=562 GN=bamB PE=3 SV=1	FALSE	80.768	54	15	24	15	392	41.8	4.91	55.61	15	1
High	Master Protein	A0A246NZI2	2,3,4,5-tetrahydropyridine-2,6-dicarboxylate N-succinyltransferase OS=Escherichia coli OX=562 GN=dapD PE=3 SV=1	FALSE	80.605	37	8	21	8	274	29.9	5.74	49.69	8	1
High	Master Protein	A0A070FBN0	Phosphoenolpyruvate carboxykinase (ATP) OS=Escherichia coli O128:H2 str. 2011C-3317 OX=1446581 GN=pckA PE=3 SV=1	FALSE	80.483	37	14	20	14	540	59.6	5.71	46.4	14	1
High	Master Protein	A0A454AAU8	Fumarate reductase flavoprotein subunit OS=Escherichia coli O6:K15:H31 (strain 536 / UPEC) OX=362663 GN=ECP_4400 PE=3 SV=1	FALSE	79.079	35	16	27	16	602	65.9	6.28	53.91	16	1
High	Master Protein	A0A4V4SBS9	Triosephosphate isomerase OS=Escherichia coli OX=562 GN=tpiA PE=3 SV=1	FALSE	78.92	72	9	20	2	255	27	5.78	44.92	9	1
High	Master Protein	A0A777PSC9	Peptidyl-prolyl cis-trans isomerase (Fragment) OS=Escherichia coli OX=562 GN=GF208_03355 PE=3 SV=1	FALSE	78.763	63	8	19	1	186	20	8.37	48.35	8	1
High	Master Protein	A0A4C3PXL3	Outer membrane lipoprotein OS=Escherichia coli OX=562 GN=yraP PE=4 SV=1	FALSE	78.495	61	9	20	9	191	20	8.63	46.82	9	1
High	Master Protein	A0A5C9AJJ8	Methionine adenosyltransferase (Fragment) OS=Escherichia coli OX=562 GN=metK PE=3 SV=1	FALSE	78.469	46	9	16	9	372	40.7	5.12	36.07	9	1
High	Master Protein	U9XFY1	Glycerol kinase OS=Escherichia coli 113290 OX=1268976 GN=glpK PE=3 SV=1	FALSE	77.746	41	14	17	5	509	56.9	5.5	47.68	14	1
High	Master Protein	A0A1X3KKM3	Inositol-1-monophosphatase OS=Escherichia coli H605 OX=656410 GN=EATG_02645 PE=3 SV=1	FALSE	77.708	61	11	19	7	267	29.1	6.96	44.25	11	1
High	Master Protein	lcl	[locus_tag=EDL933_1191] [db_xref=GO:0004069] [protein=Aspartate aminotransferase] [protein_id=AIG67386.1] [location=complement(1201322..1202512)] [gbkey=CDS]	FALSE	76.891	46	18	32	18	396	43.6	5.62	65.89	18	1
High	Master Protein	U9ZK11	Thioredoxin OS=Escherichia coli 907713 OX=1268986 GN=HMPREF1599_03322 PE=3 SV=1	FALSE	76.525	68	7	26	7	127	14	5.24	54.97	7	1
High	Master Protein	A0A1X3LA91	Elongation factor Tu (EF-Tu) (P-43) OS=Escherichia coli TA054 OX=656433 GN=EAXG_05057 PE=4 SV=1	FALSE	76.462	57	8	48	1	171	18.8	8.13	91.13	8	1
High	Master Protein	A0A3R0MLE5	DUF945 domain-containing protein OS=Escherichia coli OX=562 GN=DNX30_01930 PE=4 SV=1	FALSE	75.933	33	13	21	13	502	54.7	5.17	51.09	13	1
High	Master Protein	A0A3T3QLH8	2',3'-cyclic-nucleotide 2'-phosphodiesterase/3'-nucleotidase OS=Escherichia coli OX=562 GN=cpdB PE=3 SV=1	FALSE	75.814	34	15	21	15	647	70.9	5.82	52.83	15	1
High	Master Protein	M9GVE7	Inner membrane lipoprotein yiaD OS=Escherichia coli MP021561.2 OX=1116136 GN=yiaD PE=4 SV=1	FALSE	75.572	36	4	13	4	219	22.1	9.7	44.08	4	1
High	Master Protein	A0A3Z8FNC3	Triosephosphate isomerase OS=Escherichia coli OX=562 GN=tpiA PE=3 SV=1	FALSE	75.559	72	9	19	2	255	27	5.96	40.07	9	1
High	Master Protein	A0A7Z2UDT0	Multidrug efflux RND transporter periplasmic adaptor subunit AcrA OS=Escherichia coli OX=562 GN=acrA PE=4 SV=1	FALSE	75.374	48	13	22	13	397	42.2	8	41.31	13	1
High	Master Protein	A0A0E1LIA7	Porphobilinogen deaminase OS=Escherichia coli OX=562 GN=hemC PE=3 SV=1	FALSE	75.058	52	10	19	1	320	34.5	5.35	51.23	10	1
High	Master Protein	A0A6D0J9D7	Peptidyl-prolyl cis-trans isomerase OS=Escherichia coli OX=562 GN=ppiA PE=3 SV=1	FALSE	74.8	62	8	18	1	190	20.4	8.88	45.46	8	1
High	Master Protein	A0A0B5HLG4	Glutamate--tRNA ligase OS=Escherichia coli OX=562 GN=gltX PE=3 SV=1	FALSE	74.586	34	12	21	12	471	53.8	6.01	53.53	12	1
High	Master Protein	C3T047	Uracil phosphoribosyltransferase OS=Escherichia coli OX=562 GN=upp PE=3 SV=1	FALSE	74.552	60	8	12	8	217	23.5	6.23	29.56	8	1
High	Master Protein	U9YFF1	Glycosyl hydrolase family 3 protein OS=Escherichia coli 113290 OX=1268976 GN=HMPREF1589_01435 PE=3 SV=1	FALSE	74.243	29	17	24	17	789	86	6.65	52.3	17	1
High	Master Protein	A0A0K4JDU6	Ecotin OS=Escherichia coli OX=562 GN=eco PE=3 SV=1	FALSE	73.772	61	9	30	9	162	18.2	7.9	59	9	1
High	Master Protein	A0A210G7C8	DNA-binding protein HU-alpha OS=Escherichia coli OX=562 GN=hupA PE=3 SV=1	FALSE	73.557	58	4	44	4	90	9.5	9.58	110.17	4	1
High	Master Protein	D6IGX6	Maltoporin OS=Escherichia coli B185 OX=550676 GN=lamB PE=2 SV=1	FALSE	73.123	41	11	18	11	446	49.9	5.02	41.91	11	1
High	Master Protein	A0A2W6PA55	6-phosphogluconolactonase OS=Escherichia coli OX=562 GN=pgl PE=3 SV=1	FALSE	72.817	43	9	16	9	331	36.5	5.45	36.71	9	1
High	Master Protein	A0A2A6QA66	Chaperone SurA OS=Escherichia coli OX=562 GN=surA PE=3 SV=1	FALSE	71.922	37	14	18	14	428	47.3	6.98	44.19	14	1
High	Master Protein	lcl	[locus_tag=EDL933_3744] [db_xref=GO:0008861] [protein=Pyruvate formate-lyase] [protein_id=AIG69904.1] [location=complement(3523154..3523537)] [gbkey=CDS]	FALSE	71.52	64	7	26	7	127	14.3	5.17	52.01	7	1
High	Master Protein	A0A1X3LCR3	Putative outer membrane protein OS=Escherichia coli TA054 OX=656433 GN=EAXG_03140 PE=4 SV=1	FALSE	71.464	68	7	31	1	146	16.6	10.89	57.04	7	1
High	Master Protein	A0A3Y7WH95	Elongation factor Tu (Fragment) OS=Escherichia coli OX=562 GN=D4023_28585 PE=4 SV=1	FALSE	71.413	56	7	43	1	176	19.6	6.81	78.04	7	1
High	Master Protein	A0A193LMR7	Uncharacterized protein OS=Escherichia coli OX=562 GN=GJ11_02695 PE=4 SV=1	FALSE	71.052	57	5	12	5	190	19.4	8.15	40.87	5	1
High	Master Protein	W8ZQR6	Penicillin-binding protein activator LpoB OS=Escherichia coli O25b:H4-ST131 OX=941322 GN=lpoB PE=3 SV=1	FALSE	70.708	40	6	18	6	214	22.7	6.93	45.33	6	1
High	Master Protein	A0A3W4D5N3	Flagellar hook protein FlgE OS=Escherichia coli OX=562 GN=EBP16_07265 PE=3 SV=1	FALSE	70.632	42	9	16	9	401	42	4.64	39.84	9	1
High	Master Protein	lcl	[locus_tag=EDL933_4526] [protein=LSU ribosomal protein L24p (L26e)] [protein_id=AIG70674.1] [location=complement(4270092..4270406)] [gbkey=CDS]	FALSE	70.603	63	7	37	7	104	11.3	10.21	85.11	7	1
High	Master Protein	A0A0P7NC44	Bacterial OB fold family protein OS=Escherichia coli OX=562 GN=ACU90_20300 PE=4 SV=1	FALSE	69.88	56	6	21	1	114	12.4	5.14	52.1	6	1
High	Master Protein	A0A3S6ZF22	Lipoprotein OS=Escherichia coli OX=562 GN=CDC27_09860 PE=4 SV=1	FALSE	69.135	69	10	26	10	137	15	4.98	39.79	10	1
High	Master Protein	A0A6M0PH94	Periplasmic serine endoprotease DegP-like OS=Escherichia coli OX=562 GN=degP PE=3 SV=1	FALSE	68.005	20	7	20	1	481	49.8	8.94	47.87	7	1
High	Master Protein	A0A1X3IGL3	Phosphopentomutase OS=Escherichia coli E1114 OX=550691 GN=deoB PE=3 SV=1	FALSE	67.995	36	12	22	12	407	44.4	5.29	55.06	12	1
High	Master Protein	A0A7I9ANW0	Porphobilinogen deaminase OS=Escherichia coli OX=562 GN=hemC PE=3 SV=1	FALSE	67.936	52	10	18	1	320	34.6	5.59	50.94	10	1
High	Master Protein	A0A5C8YTV5	2,3-bisphosphoglycerate-independent phosphoglycerate mutase OS=Escherichia coli OX=562 GN=gpmM PE=3 SV=1	FALSE	67.435	36	12	20	1	514	56.1	5.34	45.23	12	1
High	Master Protein	A0A271UEQ3	DNA-binding protein OS=Escherichia coli OX=562 GN=stpA PE=3 SV=1	FALSE	67.303	61	7	22	2	134	15.4	8.4	49.76	7	1
High	Master Protein	A0A2A6Q306	Outer membrane protein assembly factor BamD OS=Escherichia coli OX=562 GN=bamD PE=3 SV=1	FALSE	67.118	45	9	23	9	245	27.9	6.09	37.5	9	1
High	Master Protein	A0A0K3JM78	Slp family outer membrane lipoprotein OS=Escherichia coli OX=562 GN=slp_1 PE=4 SV=1	FALSE	66.983	38	6	21	6	243	27.5	7.05	51.92	6	1
High	Master Protein	B7MRB4	DNA-directed RNA polymerase subunit beta' OS=Escherichia coli O81 (strain ED1a) OX=585397 GN=rpoC PE=3 SV=1	FALSE	66.829	14	13	15	13	1407	155.1	7.08	31	13	1
High	Master Protein	A0A776IB00	Glucans biosynthesis protein G OS=Escherichia coli OX=562 GN=mdoG PE=3 SV=1	FALSE	66.384	35	12	19	3	511	57.9	6.92	41.25	12	1
High	Master Protein	lcl	[locus_tag=EDL933_0336] [protein=hypothetical protein] [protein_id=AIG66542.1] [location=complement(352242..352598)] [gbkey=CDS]	FALSE	66.174	59	4	19	2	118	13.2	5.22	39.94	4	1
High	Master Protein	C3TA97	Osmotically inducible protein OS=Escherichia coli OX=562 GN=ECs2086 PE=4 SV=1	FALSE	66.147	55	7	20	7	143	15.1	5.86	49.4	7	1
High	Master Protein	A0A7D4RKY6	Aspartate-semialdehyde dehydrogenase OS=Escherichia coli O10:H32 OX=2603836 GN=asd PE=3 SV=1	FALSE	66.072	37	7	11	7	367	40	5.58	35.84	7	1
High	Master Protein	C3SUB7	Outer membrane channel TolC OS=Escherichia coli OX=562 GN=ECs3923 PE=3 SV=1	FALSE	65.508	38	11	14	11	495	54	5.66	42.55	11	1
High	Master Protein	extdb	translation initiation factor IF-3 [Escherichia coli]	FALSE	65.076	49	6	16	6	180	20.6	9.52	39.05	6	1
High	Master Protein	A0A192CJU0	OmpF OS=Escherichia coli O25b:H4 OX=941280 GN=ompF PE=3 SV=1	FALSE	64.877	44	10	21	1	362	39.3	4.92	54.01	10	1
High	Master Protein	F4V180	Outer-membrane lipoprotein LolB OS=Escherichia coli TA280 OX=656444 GN=lolB PE=3 SV=1	FALSE	64.548	63	10	21	10	207	23.6	9.04	48.56	10	1
High	Master Protein	C3T5T2	High-affinity zinc uptake system protein ZnuA OS=Escherichia coli OX=562 GN=ECs2567 PE=3 SV=1	FALSE	64.059	30	7	15	7	328	36	6.01	34.32	7	1
High	Master Protein	A0A2W6PE79	Sulfate ABC transporter substrate-binding protein (Fragment) OS=Escherichia coli OX=562 GN=DNQ45_09535 PE=4 SV=1	FALSE	63.952	57	8	20	1	164	18	9.33	55.63	8	1
High	Master Protein	A0A4C4JKH4	DNA-directed RNA polymerase subunit alpha OS=Escherichia coli OX=562 GN=rpoA PE=3 SV=1	FALSE	63.939	37	9	15	1	329	36.5	5.06	32.31	9	1
High	Master Protein	Q8X881	Uncharacterized protein OS=Escherichia coli O157:H7 OX=83334 GN=Z0955 PE=4 SV=2	FALSE	63.589	34	9	19	9	319	34.9	6.35	49.04	9	1
High	Master Protein	A0A271QQR8	7-alpha-hydroxysteroid dehydrogenase OS=Escherichia coli OX=562 GN=hdhA PE=4 SV=1	FALSE	63.437	40	8	18	8	255	26.8	5.4	43.17	8	1
High	Master Protein	A0A7Z2UIH1	Outer membrane lipoprotein chaperone LolA OS=Escherichia coli OX=562 GN=lolA PE=4 SV=1	FALSE	63.216	48	7	28	1	203	22.5	6.8	55.05	7	1
High	Master Protein	A0A6M0PC40	Adenylate kinase OS=Escherichia coli OX=562 GN=adk PE=3 SV=1	FALSE	63.123	38	7	22	1	214	23.5	5.74	45.37	7	1
High	Master Protein	A0A073HBR2	Long-chain fatty acid transport protein OS=Escherichia coli 5-366-08_S1_C3 OX=1444102 GN=AB67_2679 PE=3 SV=1	FALSE	62.483	19	5	14	5	446	48.5	5.41	40.3	5	1
High	Master Protein	Q1R833	DNA-binding protein OS=Escherichia coli (strain UTI89 / UPEC) OX=364106 GN=stpA PE=3 SV=1	FALSE	62.415	54	6	20	1	134	15.4	6.87	47.07	6	1
High	Master Protein	A0A368IM23	50S ribosomal protein L6 OS=Escherichia coli OX=562 GN=rplF PE=3 SV=1	FALSE	62.34	51	8	21	8	177	18.9	9.7	49.27	8	1
High	Master Protein	A0A1V3VXM4	Tol-Pal system protein TolB OS=Escherichia coli OX=562 GN=tolB PE=3 SV=1	FALSE	61.969	49	12	21	12	430	45.9	7.59	39.81	12	1
High	Master Protein	A0A376Y640	Peptidyl-prolyl cis-trans isomerase OS=Escherichia coli OX=562 GN=ppiA_2 PE=3 SV=1	FALSE	61.947	70	7	14	1	121	13.3	9.04	36.89	7	1
High	Master Protein	A0A3W5XVL0	Fructose-bisphosphate aldolase OS=Escherichia coli OX=562 GN=EAN77_06185 PE=3 SV=1	FALSE	61.91	29	6	11	6	359	39.2	5.86	35.12	6	1
High	Master Protein	A0A7X1VS58	YjbH domain-containing protein OS=Escherichia coli OX=562 GN=E4K51_09385 PE=4 SV=1	FALSE	60.388	25	12	18	12	698	78.7	6.18	40.04	12	1
High	Master Protein	A0A2W6P8I1	Amino acid ABC transporter substrate-binding protein (Fragment) OS=Escherichia coli OX=562 GN=DNQ45_20955 PE=4 SV=1	FALSE	60.155	59	5	10	1	119	13.2	4.91	30.68	5	1
High	Master Protein	A0A3Z1IQT5	Acid stress chaperone HdeA OS=Escherichia coli OX=562 GN=hdeA PE=3 SV=1	FALSE	59.343	55	2	61	1	110	11.9	5.25	222.09	2	1
High	Master Protein	A0A0K3T4P0	Putative lipoprotein OS=Escherichia coli OX=562 GN=ERS085366_02366 PE=4 SV=1	FALSE	59.024	63	3	11	2	117	12	5.78	28.38	3	1
High	Master Protein	C3TGW8	Putative enzyme OS=Escherichia coli OX=562 GN=ECs0948 PE=4 SV=1	FALSE	58.994	59	6	18	6	173	19.1	6.67	45.1	6	1
High	Master Protein	V0YB56	Protein GrpE OS=Escherichia coli 908525 OX=1268995 GN=grpE PE=3 SV=1	FALSE	58.976	47	6	15	6	196	21.7	4.75	31.51	6	1
High	Master Protein	F4TL18	DNA-directed RNA polymerase subunit alpha OS=Escherichia coli M718 OX=656419 GN=rpoA PE=3 SV=1	FALSE	58.707	37	9	14	1	329	36.5	5.06	29.19	9	1
High	Master Protein	D6IBG5	Pyruvate kinase OS=Escherichia coli B185 OX=550676 GN=ECDG_01725 PE=3 SV=1	FALSE	58.394	31	10	14	10	480	51.4	6.9	34.32	10	1
High	Master Protein	A0A1X3K9N1	Universal stress protein OS=Escherichia coli H605 OX=656410 GN=EATG_03926 PE=3 SV=1	FALSE	58.021	44	5	45	3	146	16.7	6.42	86.91	5	1
High	Master Protein	A0A3S4K5N5	Acid-resistance protein HdeA OS=Escherichia coli OX=562 GN=hdeA PE=4 SV=1	FALSE	57.304	71	2	59	1	66	7.3	4.88	217.97	2	1
High	Master Protein	lcl	[locus_tag=EDL933_1147] [db_xref=GO:0003723,GO:0003743,GO:0006413] [protein=Translation initiation factor 1] [protein_id=AIG67342.1] [location=complement(1144634..1144852)] [gbkey=CDS]	FALSE	57.248	71	4	12	4	72	8.2	9.25	30.52	4	1
High	Master Protein	A0A7U0RZ83	Lipoprotein OS=Escherichia coli OX=562 GN=JK368_02315 PE=4 SV=1	FALSE	57.134	58	7	18	7	192	20.9	8.63	46.91	7	1
High	Master Protein	A0A085P3Q7	TIGR00156 family protein OS=Escherichia coli OX=562 GN=D4023_27365 PE=4 SV=1	FALSE	56.918	56	6	17	1	114	12.4	5.01	35.34	6	1
High	Master Protein	A0A4Y8GY88	Fimbrial protein OS=Escherichia coli OX=562 GN=BON96_05815 PE=4 SV=1	FALSE	56.624	47	5	16	5	187	19.2	4.94	40.65	5	1
High	Master Protein	A0A376HZF3	Phosphocarrier protein Hpr OS=Escherichia coli OX=562 GN=ptsH PE=4 SV=1	FALSE	56.599	79	4	18	4	85	9.1	5.83	54.66	4	1
High	Master Protein	lcl	[locus_tag=EDL933_4520] [db_xref=GO:0003735,GO:0005622,GO:0005840,GO:0006412] [protein=SSU ribosomal protein S5p (S2e)] [protein_id=AIG70668.1] [location=complement(4267365..4267868)] [gbkey=CDS]	FALSE	56.492	72	9	19	9	167	17.6	10.11	33.6	9	1
High	Master Protein	A0A7U9FY43	Phospholipase A(1) OS=Escherichia coli TA143 OX=656437 GN=ECMG_04604 PE=4 SV=1	FALSE	56.451	55	11	14	11	289	33.1	5.33	39.28	11	1
High	Master Protein	A0A377C730	Peptidylprolyl isomerase OS=Escherichia coli OX=562 GN=ppiA_1 PE=4 SV=1	FALSE	56.418	82	7	12	2	113	12.2	9.04	39.73	7	1
High	Master Protein	A0A069XNY9	SmpA / OmlA family protein OS=Escherichia coli 3-373-03_S4_C2 OX=1444252 GN=AD17_2076 PE=4 SV=1	FALSE	56.239	68	4	22	1	108	11.5	7.24	48.47	4	1
High	Master Protein	lcl	[locus_tag=EDL933_2252] [protein=Heat shock protein hslJ] [protein_id=AIG68439.1] [location=2116540..2116962] [gbkey=CDS]	FALSE	56	60	6	23	2	140	15.2	7.21	45.09	6	1
High	Master Protein	A0A0K4PX90	Glycerol kinase OS=Escherichia coli OX=562 GN=glpK PE=3 SV=1	FALSE	55.907	28	10	14	1	502	56.1	5.78	36.13	10	1
High	Master Protein	lcl	[locus_tag=EDL933_3595] [protein=putative outer membrane lipoprotein YfeY] [protein_id=AIG69755.1] [location=complement(3360635..3361210)] [gbkey=CDS]	FALSE	55.89	38	4	11	4	191	20.8	5.22	32.71	4	1
High	Master Protein	D7Y521	Polyribonucleotide nucleotidyltransferase OS=Escherichia coli (strain MS 115-1) OX=749537 GN=pnp PE=3 SV=1	FALSE	55.813	20	11	16	11	734	79.8	5.53	31.08	11	1
High	Master Protein	A0A6D0JI41	Thiosulfate sulfurtransferase PspE OS=Escherichia coli OX=562 GN=pspE PE=4 SV=1	FALSE	55.786	43	3	23	3	104	11.5	8.15	52.23	3	1
High	Master Protein	A0A0K9T6Z5	META domain-containing protein OS=Escherichia coli M114 OX=656416 GN=ERYG_05286 PE=4 SV=1	FALSE	55.296	49	5	20	1	140	15.1	8.28	45.02	5	1
High	Master Protein	A0A7L6Y0B1	4-hydroxy-tetrahydrodipicolinate synthase OS=Escherichia coli OX=562 GN=dapA PE=3 SV=1	FALSE	55.26	31	7	18	7	292	31.2	6.44	42.52	7	1
High	Master Protein	A0A5E9S917	DUF2884 family protein OS=Escherichia coli OX=562 GN=E2135_03970 PE=4 SV=1	FALSE	55.212	44	9	20	9	239	26.4	9.19	35.6	9	1
High	Master Protein	A0A1X3KA42	DNA-directed RNA polymerase subunit omega OS=Escherichia coli H605 OX=656410 GN=rpoZ PE=3 SV=1	FALSE	55.094	70	6	15	6	91	10.2	4.92	27.63	6	1
High	Master Protein	A0A1V2GF16	Iron-sulfur cluster assembly scaffold protein IscU (Fragment) OS=Escherichia coli OX=562 GN=BXT93_12685 PE=3 SV=1	FALSE	54.998	57	6	15	3	127	13.7	4.93	36.61	6	1
High	Master Protein	A0A6M0PGG5	Glutamate-1-semialdehyde 2,1-aminomutase OS=Escherichia coli OX=562 GN=hemL PE=3 SV=1	FALSE	54.755	32	10	20	1	426	45.4	4.88	45.06	10	1
High	Master Protein	A0A7U9BHM8	Elongation factor Tu (EF-Tu) (P-43) OS=Escherichia coli H299 OX=656393 GN=ECOG_05349 PE=4 SV=1	FALSE	54.361	66	5	35	1	92	10.2	6.54	72.08	5	1
High	Master Protein	A0A3Q0P191	Glutaredoxin OS=Escherichia coli OX=562 GN=AJ318_19400 PE=3 SV=1	FALSE	54.043	69	4	18	4	83	9.2	7.24	48.47	4	1
High	Master Protein	A0A246P199	OB fold stress tolerance protein YgiW OS=Escherichia coli OX=562 GN=ygiW PE=4 SV=1	FALSE	53.861	49	8	33	3	130	14	5.26	64.68	8	1
High	Master Protein	extdb	DNA-binding protein HU-beta [Escherichia coli]	FALSE	53.784	52	4	28	4	90	9.2	9.7	68.83	4	1
High	Master Protein	lcl	[locus_tag=EDL933_4404] [db_xref=GO:0008966] [protein=Phosphoglucosamine mutase] [protein_id=AIG70552.1] [location=complement(4152858..4154195)] [gbkey=CDS]	FALSE	53.45	31	10	14	10	445	47.5	6.02	33.37	10	1
High	Master Protein	A0A3W5XZT5	Dimethylsulfoxide reductase subunit A OS=Escherichia coli OX=562 GN=EAN77_13950 PE=3 SV=1	FALSE	53.178	19	11	13	11	814	90.4	6.93	33.11	11	1
High	Master Protein	D3QWJ7	Outer membrane lipoprotein RcsF OS=Escherichia coli O55:H7 (strain CB9615 / EPEC) OX=701177 GN=rcsF PE=3 SV=1	FALSE	52.698	65	5	13	5	134	14.2	9.13	34.51	5	1
High	Master Protein	V0YFL6	50S ribosomal protein L29 OS=Escherichia coli 908525 OX=1268995 GN=rpmC PE=3 SV=1	FALSE	52.297	46	2	28	2	63	7.3	10.36	43.9	2	1
High	Master Protein	A0A3L5Q668	Nickel ABC transporter, nickel/metallophore periplasmic binding protein OS=Escherichia coli OX=562 GN=nikA PE=3 SV=1	FALSE	51.522	33	11	15	2	524	58.7	6.23	33.48	11	1
High	Master Protein	A0A3J1PE54	5'-methylthioadenosine/S-adenosylhomocysteine nucleosidase OS=Escherichia coli OX=562 GN=mtnN PE=3 SV=1	FALSE	51.49	42	5	9	5	232	24.4	5.25	24.99	5	1
High	Master Protein	A0A7Z6MES6	Bifunctional protein-disulfide isomerase/oxidoreductase DsbC OS=Escherichia coli OX=562 GN=DTM25_15215 PE=4 SV=1	FALSE	51.487	35	6	18	1	236	25.7	6.79	33.28	6	1
High	Master Protein	A0A7U9ARM8	Xaa-Pro dipeptidase (X-Pro dipeptidase) (Prolinedipeptidase) (Prolidase) (Imidodipeptidase) OS=Escherichia coli TA206 OX=656440 GN=ECKG_04987 PE=4 SV=1	FALSE	51.423	28	9	16	9	443	50.1	6.15	29.44	9	1
High	Master Protein	A0A2T1LEN1	50S ribosomal protein L22 OS=Escherichia coli OX=562 GN=rplV PE=3 SV=1	FALSE	51.358	52	6	13	5	110	12.2	10.18	35.74	6	1
High	Master Protein	A0A376LJ99	Adenine phosphoribosyltransferase OS=Escherichia coli OX=562 GN=apt PE=3 SV=1	FALSE	50.96	48	6	11	6	183	19.8	5.64	32.17	6	1
High	Master Protein	A0A1X3KA41	50S ribosomal protein L31 OS=Escherichia coli H605 OX=656410 GN=rpmE PE=3 SV=1	FALSE	50.863	53	3	33	3	70	7.8	9.32	70.88	3	1
High	Master Protein	A0A3A6TBE1	DNA-directed RNA polymerase subunit beta OS=Escherichia coli OX=562 GN=rpoB PE=3 SV=1	FALSE	50.77	13	13	14	6	1342	150.5	5.26	32.27	13	1
High	Master Protein	A0A3K9RFU0	Secreted effector protein Tir OS=Escherichia coli OX=562 GN=tir PE=3 SV=1	FALSE	50.632	26	10	10	10	552	57.4	5.15	27.21	10	1
High	Master Protein	A0A5C9AN60	50S ribosomal protein L7/L12 (Fragment) OS=Escherichia coli OX=562 GN=FWK02_11190 PE=4 SV=1	FALSE	50.603	73	8	33	1	83	8.4	4.88	72.26	8	1
High	Master Protein	A0A1M2TW09	Trigger factor OS=Escherichia coli OX=562 GN=tig PE=3 SV=1	FALSE	50.539	30	11	14	11	432	48.1	4.86	26.64	11	1
High	Master Protein	A0A7U9BBM2	Putative thiosulfate sulfurtransferase YnjE OS=Escherichia coli TA271 OX=656443 GN=ECLG_00204 PE=4 SV=1	FALSE	50.486	20	7	17	2	435	48.1	6.81	31	7	1
High	Master Protein	A0A2X1MZ94	Glucans biosynthesis protein G OS=Escherichia coli OX=562 GN=mdoG_1 PE=3 SV=1	FALSE	50.473	37	10	15	1	425	47.8	6.24	35.26	10	1
High	Master Protein	A0A3S7CL53	Histidine ABC transporter substrate-binding protein HisJ OS=Escherichia coli OX=562 GN=BWI89_01590 PE=3 SV=1	FALSE	50.321	41	8	12	7	260	27.9	5.59	31.33	8	1
High	Master Protein	A0A7U9AVW0	Outer membrane lipoprotein carrier protein LolA OS=Escherichia coli TA206 OX=656440 GN=ECKG_00771 PE=4 SV=1	FALSE	50.229	61	7	24	1	159	17.8	5.27	44.77	7	1
High	Master Protein	A0A7U8W7D5	3-hydroxydecanoyl-(Acyl carrier protein) dehydratase OS=Escherichia coli FVEC1412 OX=656380 GN=ECGG_02644 PE=4 SV=1	FALSE	50.183	34	8	23	8	238	26.3	8.25	51.88	8	1
High	Master Protein	F4NKE3	10 kDa chaperonin (Fragment) OS=Escherichia coli D9 OX=556266 GN=groS PE=3 SV=1	FALSE	50.023	45	4	31	1	114	12.1	4.97	61.08	4	1
High	Master Protein	A0A6C9TKU4	Hydrogenase large subunit OS=Escherichia coli OX=562 GN=hycE PE=4 SV=1	FALSE	49.547	21	8	11	8	569	65	6.6	29.8	8	1
High	Master Protein	A0A6M0PGK5	Chaperone protein Skp OS=Escherichia coli OX=562 GN=skp PE=3 SV=1	FALSE	49.545	22	3	16	1	161	17.6	9.82	42.55	3	1
High	Master Protein	A0A3S4NJU3	Ribosome-recycling factor OS=Escherichia coli OX=562 GN=frr PE=3 SV=1	FALSE	49.213	46	9	14	9	185	20.6	6.89	30.78	9	1
High	Master Protein	A0A6C9BYI4	Multidrug transporter subunit MdtE OS=Escherichia coli OX=562 GN=mdtE PE=3 SV=1	FALSE	49.113	35	10	13	10	385	41.2	5.91	30.18	10	1
High	Master Protein	A0A377CPD5	Thiamine-binding periplasmic protein OS=Escherichia coli OX=562 GN=tbpA PE=3 SV=1	FALSE	48.727	30	8	13	8	327	36.2	7.72	29.3	8	1
High	Master Protein	A0A3S4KC62	Pyridoxal phosphate homeostasis protein OS=Escherichia coli OX=562 GN=yggS PE=3 SV=1	FALSE	48.621	41	7	15	7	234	25.7	6.3	25.68	7	1
High	Master Protein	lcl	[locus_tag=EDL933_5547] [db_xref=GO:0003735,GO:0005622,GO:0005840,GO:0006412] [protein=LSU ribosomal protein L9p] [protein_id=AIG71686.1] [location=5328700..5329149] [gbkey=CDS]	FALSE	48.539	63	8	17	8	149	15.8	6.58	41.33	8	1
High	Master Protein	A0A376JGT9	Putative fimbrial FimF OS=Escherichia coli OX=562 GN=fimF_2 PE=4 SV=1	FALSE	48.462	48	4	9	4	176	18.9	5.24	26.91	4	1
High	Master Protein	A0A3E1W016	Oxidative stress defense protein OS=Escherichia coli OX=562 GN=yggE PE=4 SV=1	FALSE	48.281	44	7	14	7	246	26.6	6.57	28.16	7	1
High	Master Protein	A0A5C9AIQ4	OB fold stress tolerance protein YgiW (Fragment) OS=Escherichia coli OX=562 GN=ygiW PE=4 SV=1	FALSE	48.208	88	6	26	1	59	6.7	4.88	51.71	6	1
High	Master Protein	A0A4C9WKT1	Glucose-6-phosphate isomerase OS=Escherichia coli OX=562 GN=pgi PE=3 SV=1	FALSE	47.516	23	11	15	11	549	61.5	6.28	36.31	11	1
High	Master Protein	A0A4Q0FHR9	DUF1471 domain-containing protein OS=Escherichia coli OX=562 GN=EPS91_24515 PE=4 SV=1	FALSE	47.359	53	4	24	4	88	9.5	5.01	65.27	4	1
High	Master Protein	F4SVI6	Glutathione-binding protein GsiB OS=Escherichia coli M605 OX=656417 GN=ECIG_00432 PE=3 SV=1	FALSE	47.249	18	7	9	1	564	62.2	8.56	22.62	7	1
High	Master Protein	A0A3U2IVP4	Periplasmic serine endoprotease DegP-like OS=Escherichia coli OX=562 GN=degQ PE=3 SV=1	FALSE	47.141	39	12	12	4	455	47.2	5.95	29.87	12	1
High	Master Protein	A0A1X3I1D3	Glycine betaine-binding periplasmic protein OS=Escherichia coli M056 OX=656415 GN=EAMG_01047 PE=4 SV=1	FALSE	46.937	26	5	9	5	344	37.4	6.95	24.23	5	1
High	Master Protein	U9XMU7	UPF0253 protein YaeP OS=Escherichia coli 113290 OX=1268976 GN=yaeP PE=3 SV=1	FALSE	46.918	74	3	8	3	72	7.8	4.72	27.83	3	1
High	Master Protein	D7XEI7	Universal stress family protein OS=Escherichia coli MS 198-1 OX=749549 GN=HMPREF9552_05110 PE=3 SV=1	FALSE	46.251	59	7	13	7	153	17.3	6.68	33.8	7	1
High	Master Protein	D6JBH6	UPF0033 domain-containing protein OS=Escherichia coli B354 OX=550677 GN=ECEG_01246 PE=3 SV=1	FALSE	46.189	82	4	7	4	77	8.6	4.83	22.34	4	1
High	Master Protein	A0A0B5HL41	Aspartate--tRNA ligase OS=Escherichia coli OX=562 GN=aspS PE=3 SV=1	FALSE	46.169	30	11	14	9	590	65.8	5.68	31.73	11	1
High	Master Protein	A0A781XBA3	DUF406 domain-containing protein OS=Escherichia coli OX=562 GN=HH460_002997 PE=3 SV=1	FALSE	45.946	45	3	12	3	99	10.7	4.68	28.78	3	1
High	Master Protein	A0A6H3MWB8	2,5-didehydrogluconate reductase DkgA OS=Escherichia coli OX=562 GN=dkgA PE=4 SV=1	FALSE	45.738	45	9	11	9	275	31.1	6.81	30.92	9	1
High	Master Protein	Q9LAN8	Putative tellurium resistance protein C OS=Escherichia coli O157:H7 OX=83334 GN=tlrC PE=4 SV=1	FALSE	45.414	49	8	17	8	192	20.5	4.78	42.97	8	1
High	Master Protein	A0A080JA76	Thioredoxin reductase OS=Escherichia coli 1-250-04_S3_C2 OX=1444163 GN=trxB PE=3 SV=1	FALSE	45.333	45	9	14	9	321	34.6	5.77	28.3	9	1
High	Master Protein	A0A5E8HLC4	Serine--tRNA ligase OS=Escherichia coli OX=562 GN=serS PE=3 SV=1	FALSE	45.209	29	9	14	9	430	48.4	5.5	26.71	9	1
High	Master Protein	A0A4V2BMS5	Uncharacterized protein OS=Escherichia coli OX=562 GN=EVY14_22790 PE=4 SV=1	FALSE	44.952	59	4	12	4	91	10.4	4.7	31.81	4	1
High	Master Protein	E9XSF4	Orotate phosphoribosyltransferase OS=Escherichia coli TW10509 OX=656449 GN=pyrE PE=3 SV=1	FALSE	44.899	35	5	10	5	213	23.5	5.92	28.16	5	1
High	Master Protein	A0A7U9B4S0	Phosphoheptose isomerase OS=Escherichia coli TA143 OX=656437 GN=ECMG_01349 PE=4 SV=1	FALSE	44.796	57	9	18	9	192	20.8	6.42	37.05	9	1
High	Master Protein	A0A2R9V6E8	Nickel ABC transporter, nickel/metallophore periplasmic binding protein OS=Escherichia coli OX=562 GN=nikA PE=3 SV=1	FALSE	44.665	29	10	13	1	524	58.8	6.23	28.95	10	1
High	Master Protein	A0A0K4AJJ4	3-oxoacyl-[acyl-carrier-protein] synthase 2 OS=Escherichia coli OX=562 GN=fabF_2 PE=3 SV=1	FALSE	44.631	24	6	11	6	413	43	6.09	25.97	6	1
High	Master Protein	A0A0K4M2K3	2,3-bisphosphoglycerate-dependent phosphoglycerate mutase OS=Escherichia coli OX=562 GN=gpmA PE=3 SV=1	FALSE	44.481	35	8	14	8	250	28.6	6.18	29.61	8	1
High	Master Protein	A0A3S4NPI3	50S ribosomal protein L16 OS=Escherichia coli OX=562 GN=rplP PE=3 SV=1	FALSE	44.435	35	3	11	3	125	13.9	10.86	24.61	3	1
High	Master Protein	A0A3W3FJZ4	50S ribosomal protein L10 OS=Escherichia coli OX=562 GN=rplJ PE=1 SV=1	FALSE	44.399	43	6	20	6	165	17.7	8.98	43.96	6	1
High	Master Protein	A0A0K4VL53	50S ribosomal protein L3 OS=Escherichia coli OX=562 GN=rplC PE=3 SV=1	FALSE	43.677	46	8	14	8	209	22.2	9.91	25.65	8	1
High	Master Protein	A0A0F3U9R9	Acidic protein MsyB OS=Escherichia coli OX=562 GN=msyB PE=4 SV=1	FALSE	43.431	62	4	8	4	124	14.2	3.73	26.2	4	1
High	Master Protein	A0A0K4GFX6	Periplasmic protein DcrB OS=Escherichia coli OX=562 GN=dcrB PE=4 SV=1	FALSE	43.225	49	7	13	7	185	19.8	5.33	23.78	7	1
High	Master Protein	F4UXZ0	Fumarate reductase iron-sulfur subunit OS=Escherichia coli TA280 OX=656444 GN=ECNG_01233 PE=3 SV=1	FALSE	43.123	40	6	13	6	263	29.6	8.6	23.94	6	1
High	Master Protein	A0A5C9A7P7	Adenylate kinase (Fragment) OS=Escherichia coli OX=562 GN=FWK02_35515 PE=3 SV=1	FALSE	43.115	44	7	20	1	182	20.2	5.69	36.46	7	1
High	Master Protein	A0A0L6XXZ7	3'(2'),5'-bisphosphate nucleotidase CysQ OS=Escherichia coli OX=562 GN=cysQ PE=3 SV=1	FALSE	43.069	40	7	10	7	246	27.2	5.96	19.34	7	1
High	Master Protein	lcl	[locus_tag=EDL933_0715] [protein=LPS-assembly lipoprotein RlpB precursor (Rare lipoprotein B)] [protein_id=AIG66917.1] [location=complement(752740..753321)] [gbkey=CDS]	FALSE	42.932	40	6	11	6	193	21.3	7.2	24.54	6	1
High	Master Protein	A0A0D8WGP7	Pectinesterase OS=Escherichia coli OX=562 GN=BK375_20215 PE=4 SV=1	FALSE	42.866	27	7	12	7	427	46	6.27	27.05	7	1
High	Master Protein	A0A6M0PFH3	Peptidyl-prolyl cis-trans isomerase OS=Escherichia coli OX=562 GN=ppiA PE=3 SV=1	FALSE	42.508	34	5	9	1	190	20.3	8.94	25.37	5	1
High	Master Protein	extdb	co-chaperone GroES [Escherichia coli]	FALSE	42.445	47	4	26	1	97	10.4	5.24	58.31	4	1
High	Master Protein	A0A777WEH7	Copper-exporting P-type ATPase CopA OS=Escherichia coli OX=562 GN=copA PE=3 SV=1	FALSE	42.391	8	3	12	3	833	87.9	5.58	28.61	3	1
High	Master Protein	Q8XAA8	Ancillary SecYEG translocon subunit OS=Escherichia coli O157:H7 OX=83334 GN=Z3776 PE=3 SV=2	FALSE	42.07	38	5	11	1	206	22.2	5.16	29.49	5	1
High	Master Protein	A0A3T8K1X1	Nif3-like dinuclear metal center protein (Fragment) OS=Escherichia coli OX=562 GN=DM962_26565 PE=3 SV=1	FALSE	41.813	46	6	10	6	216	23.5	5.72	19.24	6	1
High	Master Protein	F4VIF1	Putative metalloprotease YggG OS=Escherichia coli H591 OX=656408 GN=ECPG_04225 PE=3 SV=1	FALSE	41.768	27	6	9	6	294	31.8	7.31	22.75	6	1
High	Master Protein	A0A5P0PUB5	RNA polymerase-binding transcription factor DksA OS=Escherichia coli OX=562 GN=dksA PE=3 SV=1	FALSE	41.716	53	7	19	7	151	17.6	5.05	20.3	7	1
High	Master Protein	A0A478LB55	Glutathione ABC transporter periplasmic binding protein OS=Escherichia coli OX=562 GN=gsiB PE=3 SV=1	FALSE	41.646	17	7	9	1	512	56.4	8.28	20.92	7	1
High	Master Protein	A0A2I6FJR1	Lysine decarboxylase OS=Escherichia coli OX=562 GN=CR538_23330 PE=3 SV=1	FALSE	41.619	23	11	14	11	715	81.2	6.34	22.56	11	1
High	Master Protein	A0A7H5D8I1	Major outer membrane lipoprotein Lpp OS=Escherichia coli OX=562 GN=lpp PE=3 SV=1	FALSE	41.607	51	4	40	4	78	8.2	8.79	82.98	4	1
High	Master Protein	A0A1X3I376	Periplasmic serine endoprotease DegP-like OS=Escherichia coli M056 OX=656415 GN=EAMG_01663 PE=3 SV=1	FALSE	41.503	37	9	10	1	352	36.5	6.33	25.86	9	1
High	Master Protein	A0A0E1L8U0	Phosphoglucomutase OS=Escherichia coli OX=562 GN=pgm PE=3 SV=1	FALSE	41.392	18	7	10	7	546	58.4	5.71	28.6	7	1
High	Master Protein	A0A6M0PNP8	Outer membrane lipoprotein SlyB OS=Escherichia coli OX=562 GN=slyB PE=4 SV=1	FALSE	41.356	29	4	45	1	155	15.6	9.38	83.54	4	1
High	Master Protein	E9XUP7	Glutamine synthetase OS=Escherichia coli TW10509 OX=656449 GN=ERFG_04801 PE=3 SV=1	FALSE	41.345	23	9	14	9	469	51.9	5.53	27.12	9	1
High	Master Protein	Q8X9B0	Citrate synthase OS=Escherichia coli O157:H7 OX=83334 GN=gltA PE=3 SV=2	FALSE	41.226	22	8	14	8	427	47.9	6.62	21.29	8	1
High	Master Protein	D8E2M2	Transaldolase OS=Escherichia coli MS 119-7 OX=679206 GN=tkt PE=3 SV=1	FALSE	41.163	10	7	11	3	990	109.4	6.51	25.09	7	1
High	Master Protein	E1J1N8	30S ribosomal protein S7 OS=Escherichia coli MS 124-1 OX=679205 GN=rpsG PE=3 SV=1	FALSE	41.105	43	5	11	5	156	17.6	10.3	24.34	5	1
High	Master Protein	A0A4C4IGI0	Glutathione synthetase OS=Escherichia coli OX=562 GN=gshB PE=3 SV=1	FALSE	40.782	23	5	11	5	316	35.5	5.3	21.42	5	1
High	Master Protein	F4V7Q4	Putative lipoprotein OS=Escherichia coli TA280 OX=656444 GN=ECNG_02973 PE=4 SV=1	FALSE	40.686	32	6	12	6	276	30.2	9.23	30.55	6	1
High	Master Protein	A0A660HE83	Uncharacterized protein OS=Escherichia coli OX=562 GN=A9X72_14540 PE=4 SV=1	FALSE	40.423	67	4	9	4	83	9.3	6.14	26.33	4	1
High	Master Protein	A0A6M0PQE0	Outer membrane protein A OS=Escherichia coli OX=562 GN=ompA PE=3 SV=1	FALSE	40.379	14	7	47	1	350	37.9	6.06	82.94	7	1
High	Master Protein	A0A0H3JD81	Soluble cytochrome b562 (Fragment) OS=Escherichia coli O157:H7 OX=83334 PE=3 SV=1	FALSE	40.32	57	6	14	6	113	12.8	4.88	23.39	6	1
High	Master Protein	A0A140NA05	Probable endonuclease 4 OS=Escherichia coli (strain B / BL21-DE3) OX=469008 GN=nfo PE=3 SV=1	FALSE	40.299	31	7	9	7	285	31.4	5.59	18.95	7	1
High	Master Protein	F4NG45	PQQ enzyme repeat protein OS=Escherichia coli D9 OX=556266 GN=SSJG_01123 PE=4 SV=1	FALSE	39.982	29	7	9	7	353	38.6	9.31	21.98	7	1
High	Master Protein	A0A0K4G3F2	Peptidyl-prolyl cis-trans isomerase OS=Escherichia coli OX=562 GN=slyD PE=3 SV=1	FALSE	39.735	42	4	11	4	194	20.6	5.03	21.42	4	1
High	Master Protein	A0A1X3ICA1	30S ribosomal protein S2 OS=Escherichia coli M056 OX=656415 GN=rpsB PE=3 SV=1	FALSE	39.689	28	6	11	6	306	34.3	7.62	30.49	6	1
High	Master Protein	A0A2D0P0D6	Superoxide dismutase OS=Escherichia coli O127:H6 OX=168807 GN=sodA PE=3 SV=1	FALSE	39.575	31	7	14	7	206	23.1	6.96	33.83	7	1
High	Master Protein	A0A7U5MX18	F0F1 ATP synthase subunit gamma OS=Escherichia coli OX=562 GN=RM34_10990 PE=4 SV=1	FALSE	39.552	38	10	14	10	287	31.6	8.76	21.27	10	1
High	Master Protein	A0A403D123	Methionine--tRNA ligase OS=Escherichia coli OX=562 GN=metG PE=3 SV=1	FALSE	39.478	17	9	10	9	677	76.3	5.86	25.58	9	1
High	Master Protein	D8EAB5	GroES-like protein OS=Escherichia coli MS 119-7 OX=679206 GN=HMPREF9346_03459 PE=3 SV=1	FALSE	39.472	34	7	8	7	354	38.2	8.94	22.63	7	1
High	Master Protein	A0A1X9TN23	Glutaredoxin OS=Escherichia coli OX=562 GN=grxD PE=3 SV=1	FALSE	39.148	46	4	8	4	115	12.9	4.75	20.58	4	1
High	Master Protein	C3SLI8	Tryptophanase OS=Escherichia coli OX=562 GN=tnaA PE=3 SV=1	FALSE	39.013	22	6	10	6	476	53.4	6.23	23.04	6	1
High	Master Protein	lcl	[locus_tag=EDL933_2623] [protein=Protein ydhR precursor] [protein_id=AIG68795.1] [location=2440872..2441177] [gbkey=CDS]	FALSE	38.96	58	6	17	3	101	11.3	5.15	33.3	6	1
High	Master Protein	lcl	[locus_tag=EDL933_3448] [db_xref=GO:0008137] [protein=NADH-ubiquinone oxidoreductase chain E] [protein_id=AIG69612.1] [location=complement(3214728..3215228)] [gbkey=CDS]	FALSE	38.448	52	5	9	5	166	18.6	5.5	21.34	5	1
High	Master Protein	D3Y2X0	Cold shock-like protein OS=Escherichia coli OX=562 GN=cspC PE=4 SV=1	FALSE	38.385	78	4	36	4	69	7.4	7.24	99.04	4	1
High	Master Protein	sp	K2C1_HUMAN	TRUE	38.368	15	9	15	9	643	65.8	8.12	24.67	9	1
High	Master Protein	A0A2S8JR35	Lipoprotein OS=Escherichia coli OX=562 GN=metQ PE=3 SV=1	FALSE	38.336	31	6	11	6	271	29.4	5.19	22.91	6	1
High	Master Protein	J7QJM7	Uncharacterized protein OS=Escherichia coli OX=562 GN=yjeI PE=4 SV=1	FALSE	38.3	58	3	11	2	128	13.1	5.78	23.54	3	1
High	Master Protein	E9Z084	Catalase-peroxidase OS=Escherichia coli M863 OX=656420 GN=katG PE=3 SV=1	FALSE	38.161	20	11	14	11	736	81.8	6.4	21.9	11	1
High	Master Protein	A0A6M0PX58	Inositol-1-monophosphatase OS=Escherichia coli OX=562 GN=suhB PE=3 SV=1	FALSE	37.924	23	5	9	1	267	29.2	8.13	21.05	5	1
High	Master Protein	A0A786KPT9	Pyridoxine/pyridoxal/pyridoxamine kinase OS=Escherichia coli OX=562 GN=pdxK PE=3 SV=1	FALSE	37.793	35	7	11	7	283	30.8	5.34	28.19	7	1
High	Master Protein	A0A3R0MQE3	4-hydroxy-tetrahydrodipicolinate reductase OS=Escherichia coli OX=562 GN=dapB PE=3 SV=1	FALSE	37.703	35	6	7	6	273	28.8	5.76	21	6	1
High	Master Protein	A0A4D2R7Z2	Alpha-1,4 glucan phosphorylase OS=Escherichia coli OX=562 GN=glgP_1 PE=3 SV=1	FALSE	37.36	20	14	16	14	797	90.5	7.52	21.7	14	1
High	Master Protein	A0A085P478	ABC transporter arginine-binding protein 1 OS=Escherichia coli OX=562 GN=artJ PE=3 SV=1	FALSE	37.003	55	9	13	9	243	26.8	7.36	18.49	9	1
High	Master Protein	A0A140NGG7	30S ribosomal protein S6 OS=Escherichia coli (strain B / BL21-DE3) OX=469008 GN=rpsF PE=3 SV=1	FALSE	36.952	40	4	12	4	131	15.2	5.39	24.44	4	1
High	Master Protein	lcl	[locus_tag=EDL933_0755] [db_xref=GO:0003700] [protein=Ferric uptake regulation protein FUR] [protein_id=AIG66957.1] [location=complement(790001..790447)] [gbkey=CDS]	FALSE	36.907	57	7	13	7	148	16.8	6.11	28.48	7	1
High	Master Protein	A0A2X1JA99	Murein hydrolase activator NlpD OS=Escherichia coli OX=562 GN=nlpD PE=4 SV=1	FALSE	36.841	35	9	14	9	379	40.1	9.51	22.99	9	1
High	Master Protein	lcl	[locus_tag=EDL933_2092] [protein=hypothetical protein] [protein_id=AIG68280.1] [location=complement(1940472..1940675)] [gbkey=CDS]	FALSE	36.565	79	6	25	6	67	7.3	8.21	40.8	6	1
High	Master Protein	A0A0V7X3S8	Aspartate ammonia-lyase OS=Escherichia coli OX=562 GN=aspA PE=3 SV=1	FALSE	36.565	26	11	14	11	478	52.3	5.22	21.97	11	1
High	Master Protein	B7UR10	Thymidine phosphorylase OS=Escherichia coli O127:H6 (strain E2348/69 / EPEC) OX=574521 GN=deoA PE=3 SV=1	FALSE	36.511	22	8	12	8	440	47.2	5.38	17.73	8	1
High	Master Protein	A0A7U9G8Q3	1-phosphofructokinase OS=Escherichia coli H299 OX=656393 GN=ECOG_03598 PE=4 SV=1	FALSE	36.476	36	8	13	8	309	32.4	5.35	27.7	8	1
High	Master Protein	A0A3A6RW96	DUF2511 domain-containing protein OS=Escherichia coli OX=562 GN=D3822_16285 PE=4 SV=1	FALSE	36.395	63	5	10	5	115	12.9	6.64	22.38	5	1
High	Master Protein	A0A0Q3B606	Superoxide dismutase [Cu-Zn] OS=Escherichia coli OX=562 GN=AM270_03715 PE=3 SV=1	FALSE	36.227	61	7	13	7	173	17.7	6.64	21.18	7	1
High	Master Protein	lcl	[locus_tag=EDL933_3718] [db_xref=GO:0006808,GO:0030234] [protein=Nitrogen regulatory protein P-II] [protein_id=AIG69878.1] [location=complement(3494327..3494665)] [gbkey=CDS]	FALSE	36.16	42	3	9	3	112	12.4	5.34	18.4	3	1
High	Master Protein	A0A5B3B7F1	N-acetyltransferase OS=Escherichia coli OX=562 GN=EA834_13645 PE=4 SV=1	FALSE	35.723	51	3	9	3	89	10.4	7.34	25.1	3	1
High	Master Protein	lcl	[locus_tag=EDL933_3687] [db_xref=GO:0005506,GO:0006118,GO:0009055] [protein=Ferredoxin, 2Fe-2S] [protein_id=AIG69847.1] [location=complement(3464294..3464629)] [gbkey=CDS]	FALSE	35.457	67	5	10	5	111	12.3	4.59	24.09	5	1
High	Master Protein	A0A6M7GX12	Universal stress protein OS=Escherichia coli O157:H7 OX=83334 GN=uspA PE=3 SV=1	FALSE	35.425	50	3	10	3	144	16	5.29	28.1	3	1
High	Master Protein	A0A0D8W5G8	Sulfurtransferase OS=Escherichia coli OX=562 GN=D9D31_03440 PE=4 SV=1	FALSE	35.302	15	6	14	1	435	48.3	6.81	22.83	6	1
High	Master Protein	A0A5F1DLT9	Protein-export protein SecB OS=Escherichia coli OX=562 GN=secB PE=3 SV=1	FALSE	34.956	23	2	7	2	155	17.2	4.37	21.62	2	1
High	Master Protein	A0A6M0PEW2	50S ribosomal protein L17 OS=Escherichia coli OX=562 GN=rplQ PE=3 SV=1	FALSE	34.913	38	6	16	6	128	14.5	11.05	33.44	6	1
High	Master Protein	A0A6G4BWA7	Periplasmic nitrate reductase OS=Escherichia coli OX=562 GN=napA PE=3 SV=1	FALSE	34.692	11	7	10	7	828	93	8.03	25.8	7	1
High	Master Protein	A0A246P0W3	Citrate lyase alpha chain OS=Escherichia coli OX=562 GN=citF PE=4 SV=1	FALSE	34.681	18	7	8	7	510	55.2	6.54	19.25	7	1
High	Master Protein	B7NMH9	Fe/S biogenesis protein NfuA OS=Escherichia coli O7:K1 (strain IAI39 / ExPEC) OX=585057 GN=nfuA PE=3 SV=1	FALSE	34.678	49	6	11	6	191	21	4.64	27.67	6	1
High	Master Protein	A0A2A3VRV9	Soluble cytochrome b562 OS=Escherichia coli OX=562 GN=cybC PE=3 SV=1	FALSE	34.039	38	5	14	5	128	14.1	7.4	30.89	5	1
High	Master Protein	A0A7U9QC98	Heat shock chaperone OS=Escherichia coli O145:H28 OX=1078034 GN=ibpA PE=4 SV=1	FALSE	34.028	61	6	9	6	137	15.8	5.83	22.48	6	1
High	Master Protein	V0VWN1	Uncharacterized protein OS=Escherichia coli 908519 OX=1268991 GN=HMPREF1604_02775 PE=4 SV=1	FALSE	33.944	35	8	9	8	296	33	8.65	22.28	8	1
High	Master Protein	A0A6L6S7E6	Ancillary SecYEG translocon subunit OS=Escherichia coli OX=562 GN=GNZ05_14280 PE=3 SV=1	FALSE	33.935	31	5	10	1	206	22.2	5.47	27.48	5	1
High	Master Protein	A0A7M3D646	Stringent starvation protein A OS=Escherichia coli OX=562 GN=EPS70_03125 PE=3 SV=1	FALSE	33.876	42	7	11	7	212	24.3	5.49	24.67	7	1
High	Master Protein	A0A3R1AGM6	Uridylate kinase OS=Escherichia coli OX=562 GN=pyrH PE=3 SV=1	FALSE	33.664	25	4	10	4	241	26	8.38	16.35	4	1
High	Master Protein	Q0TDT9	Ribose-5-phosphate isomerase A OS=Escherichia coli O6:K15:H31 (strain 536 / UPEC) OX=362663 GN=rpiA PE=3 SV=1	FALSE	33.639	22	4	14	4	231	24.6	6.8	35.84	4	1
High	Master Protein	A0A6M0PNV1	Xanthine-guanine phosphoribosyltransferase OS=Escherichia coli OX=562 GN=gpt PE=3 SV=1	FALSE	33.568	33	4	8	4	152	16.9	5.85	21.47	4	1
High	Master Protein	A0A5P0JCC8	Succinate--CoA ligase [ADP-forming] subunit beta OS=Escherichia coli OX=562 GN=sucC PE=3 SV=1	FALSE	33.489	24	8	9	8	388	41.3	5.41	15.49	8	1
High	Master Protein	B7M9U1	Oxidoreductase subunit OS=Escherichia coli O45:K1 (strain S88 / ExPEC) OX=585035 GN=ynfF PE=3 SV=1	FALSE	33.414	16	8	13	7	807	89.9	7.11	23.3	8	1
High	Master Protein	A0A1X3I2L1	Protein YgaD OS=Escherichia coli M056 OX=656415 GN=EAMG_01062 PE=4 SV=1	FALSE	33.377	51	5	7	5	166	17.7	5.12	19.94	5	1
High	Master Protein	A0A3J2BS80	Protein CreA OS=Escherichia coli OX=562 GN=creA PE=4 SV=1	FALSE	33.375	46	6	11	6	157	17.1	8.95	23.56	6	1
High	Master Protein	A0A6C9QIE4	Zinc ribbon-containing protein (Fragment) OS=Escherichia coli OX=562 GN=GKE65_26225 PE=4 SV=1	FALSE	33.365	52	6	11	6	121	14.2	4.86	28.69	6	1
High	Master Protein	A0A0K4JHU9	Ribonucleoside-diphosphate reductase OS=Escherichia coli OX=562 GN=nrdB PE=3 SV=1	FALSE	33.298	22	7	11	7	376	43.5	4.84	20.81	7	1
High	Master Protein	A0A0H3JJ33	Dipeptide/heme ABC transporter periplasmic binding protein OS=Escherichia coli O157:H7 OX=83334 GN=dppA PE=3 SV=1	FALSE	33.058	24	8	8	8	535	60.3	6.65	22.33	8	1
High	Master Protein	F4NQL2	Uncharacterized protein OS=Escherichia coli D9 OX=556266 GN=SSJG_04480 PE=4 SV=1	FALSE	33.051	57	4	8	4	99	11.4	6.13	22.02	4	1
High	Master Protein	C3SCK5	Uncharacterized protein OS=Escherichia coli OX=562 GN=ECs2913 PE=4 SV=1	FALSE	32.977	35	4	8	4	172	19.4	6.89	20.46	4	1
High	Master Protein	A0A6M0PW43	Iron-sulfur cluster assembly scaffold protein IscU OS=Escherichia coli OX=562 GN=iscU PE=3 SV=1	FALSE	32.931	51	4	7	1	128	13.7	5.52	16.76	4	1
High	Master Protein	A0A330AAI6	Hydroxyacylglutathione hydrolase GloC OS=Escherichia coli OX=562 GN=gloC PE=4 SV=1	FALSE	32.635	46	7	11	7	215	23.7	5.22	21.12	7	1
High	Master Protein	A0A1M1W9W5	Chromate reductase OS=Escherichia coli OX=562 GN=azr PE=4 SV=1	FALSE	32.274	69	5	6	5	188	20.4	5.02	14.13	5	1
High	Master Protein	A0A3J2BVB0	Anti-sigma-E factor RseA OS=Escherichia coli OX=562 GN=rseA PE=3 SV=1	FALSE	32.071	31	4	10	3	212	23.8	5.2	13.84	4	1
High	Master Protein	A0A5N3CY36	Orotidine 5'-phosphate decarboxylase OS=Escherichia coli OX=562 GN=pyrF PE=3 SV=1	FALSE	31.993	49	9	11	9	245	26.1	6.93	27.19	9	1
High	Master Protein	lcl	[locus_tag=EDL933_1638] [db_xref=GO:0004151] [protein=Dihydroorotase] [protein_id=AIG67826.1] [location=complement(1568440..1569486)] [gbkey=CDS]	FALSE	31.868	36	8	9	8	348	38.8	6.43	23.37	8	1
High	Master Protein	A0A5F1VBW1	Fimbrial chaperone protein FimC OS=Escherichia coli OX=562 GN=E5S58_17490 PE=3 SV=1	FALSE	31.839	30	3	7	3	236	26.1	9.47	19.33	3	1
High	Master Protein	A0A077K5Q0	30S ribosomal protein S10 OS=Escherichia coli O157 OX=1045010 GN=rpsJ PE=3 SV=1	FALSE	31.771	35	4	11	4	103	11.7	9.32	28.44	4	1
High	Master Protein	A0A1X3KKI1	Arsenate reductase OS=Escherichia coli H605 OX=656410 GN=EATG_02602 PE=3 SV=1	FALSE	31.745	38	2	4	2	119	13.5	5.6	15.52	2	1
High	Master Protein	A0A6H3MRK0	DUF481 domain-containing protein OS=Escherichia coli OX=562 GN=E5S56_07700 PE=4 SV=1	FALSE	31.377	35	5	9	5	252	27.6	5.27	19.22	5	1
High	Master Protein	A0A140RRF3	Cysteine desulfurase IscS OS=Escherichia coli OX=562 GN=iscS PE=3 SV=1	FALSE	31.294	21	7	10	7	404	45	6.25	17.89	7	1
High	Master Protein	A0A070V1H5	Protein/nucleic acid deglycase HchA OS=Escherichia coli 2-177-06_S3_C2 OX=1444151 GN=hchA PE=2 SV=1	FALSE	31.272	33	8	10	8	283	31.2	6.02	17.33	8	1
High	Master Protein	A0A070SP47	Phage shock protein A OS=Escherichia coli 2-210-07_S3_C3 OX=1444180 GN=pspA PE=3 SV=1	FALSE	31.207	41	8	10	8	222	25.5	5.39	22.54	8	1
High	Master Protein	A0A4Q0E762	Purine nucleoside phosphoramidase OS=Escherichia coli OX=562 GN=EO241_06825 PE=4 SV=1	FALSE	31.037	39	4	9	4	119	13.2	6.18	16.63	4	1
High	Master Protein	B1IQH7	UPF0325 protein YaeH OS=Escherichia coli (strain ATCC 8739 / DSM 1576 / NBRC 3972 / NCIMB 8545 / WDCM 00012 / Crooks) OX=481805 GN=yaeH PE=3 SV=1	FALSE	30.722	51	6	11	6	128	15.2	8.06	19.4	6	1
High	Master Protein	lcl	[locus_tag=EDL933_2594] [db_xref=GO:0004733] [protein=Pyridoxamine 5'-phosphate oxidase] [protein_id=AIG68766.1] [location=complement(2411539..2412195)] [gbkey=CDS]	FALSE	30.636	39	7	10	7	218	25.5	9.16	22.56	7	1
High	Master Protein	D6JGR5	Uncharacterized protein OS=Escherichia coli B354 OX=550677 GN=ECEG_04110 PE=4 SV=1	FALSE	30.477	40	4	9	4	120	13.7	9.5	17.36	4	1
High	Master Protein	A0A7U9APH9	Lysine--tRNA ligase OS=Escherichia coli TA206 OX=656440 GN=ECKG_03208 PE=4 SV=1	FALSE	30.285	15	7	9	5	505	57.8	5.27	17.04	7	1
High	Master Protein	lcl	[locus_tag=EDL933_0161] [db_xref=GO:0005554] [protein=putative iron binding protein from the HesB_IscA_SufA family] [protein_id=AIG66369.1] [location=180810..181154] [gbkey=CDS]	FALSE	30.2	61	4	8	4	114	12.1	4.31	22	4	1
High	Master Protein	F4TEG6	Universal stress protein F OS=Escherichia coli M718 OX=656419 GN=ECJG_04680 PE=3 SV=1	FALSE	30.097	28	4	10	4	168	18.4	6.42	22.5	4	1
High	Master Protein	A0A7U8MQX6	Metalloprotease StcE OS=Escherichia coli O157:H7 OX=83334 GN=stcE PE=4 SV=1	FALSE	30.069	8	5	8	5	898	99.5	6.87	16.28	5	1
High	Master Protein	WP_001138117.1	MULTISPECIES: 30S ribosomal protein S19 [Proteobacteria]	FALSE	30.034	28	3	12	2	92	10.4	10.52	11.58	3	1
High	Master Protein	lcl	[locus_tag=EDL933_2533] [protein=putative secreted protein] [protein_id=AIG68707.1] [location=2350071..2350412] [gbkey=CDS]	FALSE	30.015	48	5	14	5	113	12.9	8.31	30.59	5	1
High	Master Protein	A0A6C9HFT6	Small heat shock protein IbpB OS=Escherichia coli OX=562 GN=ibpB PE=3 SV=1	FALSE	29.976	37	4	15	4	142	16.1	5.29	28.45	4	1
High	Master Protein	A0A6L2GFR1	50S ribosomal protein L11 OS=Escherichia coli OX=562 GN=rplK PE=3 SV=1	FALSE	29.624	38	5	12	5	142	14.9	9.63	27.14	5	1
High	Master Protein	A0A368ITM0	Delta-aminolevulinic acid dehydratase OS=Escherichia coli OX=562 GN=hemB PE=3 SV=1	FALSE	29.579	22	5	7	5	324	35.5	5.6	16.32	5	1
High	Master Protein	A0A2W6PHV2	Aminopeptidase PepB (Fragment) OS=Escherichia coli OX=562 GN=DNQ45_01245 PE=3 SV=1	FALSE	29.543	29	8	11	8	354	38.6	5.63	18.1	8	1
High	Master Protein	D3QW90	Uncharacterized protein OS=Escherichia coli O55:H7 (strain CB9615 / EPEC) OX=701177 GN=yidB PE=4 SV=1	FALSE	29.457	34	2	5	2	135	14.2	4.48	13.73	2	1
High	Master Protein	D3QQM5	Glycine dehydrogenase (decarboxylating) OS=Escherichia coli O55:H7 (strain CB9615 / EPEC) OX=701177 GN=gcvP PE=3 SV=1	FALSE	29.39	11	7	10	7	957	104.3	6	19.19	7	1
High	Master Protein	U9XXW3	3-deoxy-manno-octulosonate cytidylyltransferase OS=Escherichia coli 113290 OX=1268976 GN=kdsB PE=3 SV=1	FALSE	29.384	37	6	10	6	248	27.6	5.64	21.16	6	1
High	Master Protein	D8ACZ7	Thiol:disulfide interchange protein OS=Escherichia coli (strain MS 21-1) OX=749527 GN=dsbG PE=3 SV=1	FALSE	29.353	31	7	10	7	268	29.7	7.87	22.66	7	1
High	Master Protein	A0A1I9X2G1	Superoxide dismutase [Cu-Zn] OS=Escherichia coli OX=562 GN=AU473_12830 PE=3 SV=1	FALSE	29.259	47	5	10	5	175	18.2	7.36	16.75	5	1
High	Master Protein	A0A6M0PYE8	DNA-directed RNA polymerase subunit beta OS=Escherichia coli OX=562 GN=rpoB PE=3 SV=1	FALSE	29.016	8	8	9	1	1342	150.4	5.26	16.57	8	1
High	Master Protein	A0A0K4FIG2	DNA gyrase inhibitor YacG OS=Escherichia coli OX=562 GN=yacG PE=3 SV=1	FALSE	28.983	74	3	5	3	65	7.3	4.56	13.26	3	1
High	Master Protein	A0A4Q7GTJ6	30S ribosomal protein S8 (Fragment) OS=Escherichia coli OX=562 GN=EXM29_10285 PE=3 SV=1	FALSE	28.965	68	8	16	8	120	13.1	9.74	22.22	8	1
High	Master Protein	U9ZLD5	Pyridoxine 5'-phosphate synthase OS=Escherichia coli 907713 OX=1268986 GN=pdxJ PE=3 SV=1	FALSE	28.88	38	5	5	5	248	27	6.13	12.97	5	1
High	Master Protein	A0A7U8MMH1	Secreted protein EspA OS=Escherichia coli O157:H7 OX=83334 GN=espA PE=4 SV=1	FALSE	28.639	40	6	8	6	192	20.6	5.01	17.56	6	1
High	Master Protein	D6IED7	50S ribosomal protein L13 OS=Escherichia coli B185 OX=550676 GN=rplM PE=3 SV=1	FALSE	28.591	40	6	11	6	167	18.8	9.66	20.37	6	1
High	Master Protein	A0A5F1DZ58	Osmotically-inducible lipoprotein OsmE OS=Escherichia coli OX=562 GN=osmE PE=4 SV=1	FALSE	28.54	65	4	15	1	112	12	7.87	24.43	4	1
High	Master Protein	A0A3W4D6A0	2-C-methyl-D-erythritol 2,4-cyclodiphosphate synthase OS=Escherichia coli OX=562 GN=ispF PE=3 SV=1	FALSE	28.514	50	5	7	5	159	16.9	6.42	12.84	5	1
High	Master Protein	A0A6L4XG38	Ribose-phosphate pyrophosphokinase OS=Escherichia coli OX=562 GN=prs PE=3 SV=1	FALSE	28.444	30	7	9	7	315	34.2	5.44	12.38	7	1
High	Master Protein	lcl	[locus_tag=EDL933_3106] [db_xref=GO:0008446] [protein=GDP-mannose 4,6-dehydratase] [protein_id=AIG69272.1] [location=complement(2868052..2869170)] [gbkey=CDS]	FALSE	28.437	20	5	7	5	372	41.6	5.82	15.79	5	1
High	Master Protein	B7MVQ9	Peptide methionine sulfoxide reductase MsrB OS=Escherichia coli O81 (strain ED1a) OX=585397 GN=msrB PE=3 SV=1	FALSE	28.436	59	5	7	5	137	15.5	6.11	12.53	5	1
High	Master Protein	A0A4Y8H1W5	Protein YebF OS=Escherichia coli OX=562 GN=yebF PE=3 SV=1	FALSE	28.354	39	3	5	3	118	12.9	8.9	13.71	3	1
High	Master Protein	U9XWM4	YebG protein OS=Escherichia coli 113303 OX=1268978 GN=HMPREF1591_01622 PE=4 SV=1	FALSE	28.296	57	3	5	3	96	10.7	4.59	12.18	3	1
High	Master Protein	A0A366YLD4	Acyl carrier protein OS=Escherichia coli OX=562 GN=acpP PE=3 SV=1	FALSE	28.208	42	4	33	4	78	8.6	4.16	80.23	4	1
High	Master Protein	sp	K1C10_HUMAN	TRUE	28.098	17	9	10	8	593	59.5	5.21	12.46	9	1
High	Master Protein	A0A0D8W4W2	Probable Fe(2+)-trafficking protein OS=Escherichia coli OX=562 GN=yggX PE=3 SV=1	FALSE	27.945	74	6	8	6	91	10.9	5.94	15.11	6	1
High	Master Protein	A0A4Q0CGW3	Oxidoreductase OS=Escherichia coli OX=562 GN=EQ830_06910 PE=4 SV=1	FALSE	27.924	32	8	8	8	345	38.7	6.29	15.76	8	1
High	Master Protein	lcl	[locus_tag=EDL933_3767] [db_xref=GO:0003735,GO:0005622,GO:0005840,GO:0006412] [protein=LSU ribosomal protein L19p] [protein_id=AIG69927.1] [location=complement(3551192..3551539)] [gbkey=CDS]	FALSE	27.855	66	7	11	7	115	13.1	10.62	18.97	7	1
High	Master Protein	C3SXM3	HypE protein OS=Escherichia coli OX=562 GN=ECs3586 PE=3 SV=1	FALSE	27.851	25	6	7	6	322	33.8	5.1	17.16	6	1
High	Master Protein	A0A0L6NRX8	Multicopper oxidase OS=Escherichia coli OX=562 GN=cueO PE=4 SV=1	FALSE	27.818	15	5	7	5	516	56.6	6.7	17.77	5	1
High	Master Protein	A0A0C2B4R3	MmcQ/YjbR family DNA-binding protein OS=Escherichia coli OX=562 GN=yjbR_2 PE=4 SV=1	FALSE	27.57	37	4	9	4	118	13.5	6.52	17.82	4	1
High	Master Protein	A0A4D4EJE5	Sugar-specific enzyme IIA component of PTS OS=Escherichia coli OX=562 GN=ptsN PE=4 SV=1	FALSE	27.485	26	3	4	3	163	18	5.86	14.54	3	1
High	Master Protein	A0A0B0UZP0	Protein YtfJ OS=Escherichia coli OX=562 GN=ytfJ_1 PE=4 SV=1	FALSE	27.45	41	5	9	3	184	20.5	8.6	20.46	5	1
High	Master Protein	A0A271R7E2	Uncharacterized protein OS=Escherichia coli OX=562 GN=BIZ41_05470 PE=4 SV=1	FALSE	27.349	27	3	8	3	180	18.6	5.03	14.6	3	1
High	Master Protein	A0A2X1K8G8	Putative translation initiation inhibitor OS=Escherichia coli OX=562 GN=yoaB PE=3 SV=1	FALSE	27.24	40	4	7	4	115	12.6	5.16	16.77	4	1
High	Master Protein	A8A0Q4	Integration host factor subunit alpha OS=Escherichia coli O9:H4 (strain HS) OX=331112 GN=ihfA PE=3 SV=1	FALSE	26.695	52	6	14	6	99	11.4	9.35	23.95	6	1
High	Master Protein	A0A787U4V7	Peptidase E OS=Escherichia coli OX=562 GN=pepE PE=3 SV=1	FALSE	26.641	26	4	7	4	229	24.6	6.02	17.89	4	1
High	Master Protein	A0A2D0NLL4	Chaperone protein Skp OS=Escherichia coli O127:H6 OX=168807 GN=skp PE=3 SV=1	FALSE	26.526	35	5	20	1	133	14.9	9.7	29.49	5	1
High	Master Protein	E9XQ08	Uncharacterized protein OS=Escherichia coli TW10509 OX=656449 GN=ERFG_03155 PE=4 SV=1	FALSE	26.504	70	3	8	1	53	6.2	8.16	16.01	3	1
High	Master Protein	B7UJP9	UPF0234 protein YajQ OS=Escherichia coli O127:H6 (strain E2348/69 / EPEC) OX=574521 GN=yajQ PE=3 SV=1	FALSE	26.482	47	6	7	6	163	18.3	6.24	19.04	6	1
High	Master Protein	A0A5C9AFJ7	Molecular chaperone OsmY (Fragment) OS=Escherichia coli OX=562 GN=osmY PE=4 SV=1	FALSE	26.476	43	4	14	1	111	11.6	5.97	31.18	4	1
High	Master Protein	D6JGR4	Uncharacterized protein OS=Escherichia coli B354 OX=550677 GN=ECEG_04109 PE=4 SV=1	FALSE	26.304	59	3	7	3	69	8	9.09	16.04	3	1
High	Master Protein	A0A5B7KWF8	UPF0304 protein YfbU OS=Escherichia coli OX=562 GN=yfbU PE=3 SV=1	FALSE	26.286	33	5	8	5	164	19.6	6.52	14.7	5	1
High	Master Protein	A0A366YQS4	Pyridoxal kinase PdxY OS=Escherichia coli OX=562 GN=pdxY PE=3 SV=1	FALSE	26.221	24	5	8	5	287	31.3	6.62	13.95	5	1
High	Master Protein	C3TJS3	Citrate (pro-3S)-lyase subunit beta OS=Escherichia coli OX=562 GN=ECs0655 PE=3 SV=1	FALSE	26.208	31	6	7	6	307	33.6	5.74	13.44	6	1
High	Master Protein	A0A7D4R6E5	Potassium binding protein Kbp OS=Escherichia coli O10:H32 OX=2603836 GN=kbp PE=4 SV=1	FALSE	26.149	45	5	6	5	149	16.1	6	14.79	5	1
High	Master Protein	A0A0K3ZUX7	Copper homeostasis protein (Lipoprotein nlpE) OS=Escherichia coli OX=562 GN=cutF PE=4 SV=1	FALSE	26.109	37	7	9	7	236	25.8	5.2	21.36	7	1
High	Master Protein	A0A376JKU3	Universal stress protein E OS=Escherichia coli OX=562 GN=uspE PE=4 SV=1	FALSE	26.001	23	4	5	4	287	32.6	6.52	13.73	4	1
High	Master Protein	F4NJX2	Maltose operon periplasmic protein (MalM) OS=Escherichia coli D9 OX=556266 GN=SSJG_02502 PE=4 SV=1	FALSE	25.955	32	5	15	5	309	32.3	8.75	23.88	5	1
High	Master Protein	A0A6G4C3L9	Sulfatase-like hydrolase/transferase OS=Escherichia coli OX=562 GN=G4V04_14210 PE=3 SV=1	FALSE	25.796	17	7	10	7	560	62.7	6.05	16.63	7	1
High	Master Protein	A0A2D0P9U5	Succinate--CoA ligase [ADP-forming] subunit alpha OS=Escherichia coli O127:H6 OX=168807 GN=sucD PE=3 SV=1	FALSE	25.635	26	7	10	7	289	29.8	6.54	17.32	7	1
High	Master Protein	C3SG77	Oligoribonuclease OS=Escherichia coli OX=562 GN=orn PE=3 SV=1	FALSE	25.613	30	6	8	6	204	23.4	5.21	20.22	6	1
High	Master Protein	lcl	[locus_tag=EDL933_3092] [db_xref=GO:0004399] [protein=Histidinol dehydrogenase] [protein_id=AIG69258.1] [location=2851470..2852774] [gbkey=CDS]	FALSE	25.595	19	7	7	7	434	46	5.31	13.55	7	1
High	Master Protein	A0A6M0PZM1	Translational regulator CsrA OS=Escherichia coli OX=562 GN=csrA PE=3 SV=1	FALSE	25.477	43	2	9	2	61	6.9	8.62	15.87	2	1
High	Master Protein	D6I5T1	Alkyl hydroperoxide reductase subunit F OS=Escherichia coli B185 OX=550676 GN=ECDG_00452 PE=3 SV=1	FALSE	25.368	16	7	7	7	531	57.4	5.8	14.74	7	1
High	Master Protein	B7MGE9	Glutamine--fructose-6-phosphate aminotransferase [isomerizing] OS=Escherichia coli O45:K1 (strain S88 / ExPEC) OX=585035 GN=glmS PE=3 SV=1	FALSE	25.323	12	5	6	5	609	66.8	5.87	10.6	5	1
High	Master Protein	A0A070UZD3	Outer membrane protein W OS=Escherichia coli 2-177-06_S3_C2 OX=1444151 GN=ompW PE=4 SV=1	FALSE	25.235	25	3	9	1	212	22.9	6.52	10.73	3	1
High	Master Protein	lcl	[locus_tag=EDL933_4693] [protein=Acyl carrier protein (ACP2)] [protein_id=AIG70838.1] [location=4423509..4423760] [gbkey=CDS]	FALSE	25.126	51	3	6	3	83	9.6	4.7	10.95	3	1
High	Master Protein	B7L9L3	NagA protein OS=Escherichia coli (strain 55989 / EAEC) OX=585055 GN=nagA PE=3 SV=1	FALSE	24.91	18	4	4	4	382	40.8	5.82	11.76	4	1
High	Master Protein	A0A2A3V6H8	Glucose-1-phosphate adenylyltransferase OS=Escherichia coli OX=562 GN=glgC PE=3 SV=1	FALSE	24.817	14	5	6	5	431	48.7	6.14	13.57	5	1
High	Master Protein	A0A3R0NE37	Cell division protein DamX OS=Escherichia coli OX=562 GN=damX PE=3 SV=1	FALSE	24.817	14	6	11	6	428	46.1	5.81	23.73	6	1
High	Master Protein	A0A6M9RUW1	Two-component system QseEF-associated lipoprotein QseG OS=Escherichia coli OX=562 GN=qseG PE=4 SV=1	FALSE	24.806	32	6	7	6	237	27.3	6.54	13.73	6	1
High	Master Protein	V0VHJ6	Outer membrane protein assembly factor BamE OS=Escherichia coli 908519 OX=1268991 GN=bamE PE=3 SV=1	FALSE	24.766	49	2	7	2	113	12.3	8.51	14.74	2	1
High	Master Protein	A0AB39	Tellurite resistance protein TerZ OS=Escherichia coli OX=562 GN=terZ PE=4 SV=1	FALSE	24.693	42	5	6	5	193	20.9	6.1	14.93	5	1
High	Master Protein	A0A6D0R0F3	Uroporphyrinogen-III C-methyltransferase OS=Escherichia coli OX=562 GN=hemX PE=4 SV=1	FALSE	24.6	31	9	12	1	393	43	4.75	16.63	9	1
High	Master Protein	F4TAS6	6,7-dimethyl-8-ribityllumazine synthase OS=Escherichia coli M718 OX=656419 GN=ribH PE=3 SV=1	FALSE	24.599	22	3	5	3	188	19.8	9.55	15.3	3	1
High	Master Protein	F4UZK8	Cold shock protein OS=Escherichia coli TA280 OX=656444 GN=ECNG_04809 PE=4 SV=1	FALSE	24.534	59	4	18	4	79	8.6	9.19	32.39	4	1
High	Master Protein	E0IWA5	Proline aminopeptidase P II OS=Escherichia coli (strain ATCC 9637 / CCM 2024 / DSM 1116 / LMG 11080 / NBRC 13500 / NCIMB 8666 / NRRL B-766 / W) OX=566546 GN=pepP PE=4 SV=1	FALSE	24.456	20	5	6	5	441	49.8	5.34	9.74	5	1
High	Master Protein	F4V713	30S ribosomal protein S13 OS=Escherichia coli TA280 OX=656444 GN=rpsM PE=3 SV=1	FALSE	24.373	42	4	6	4	118	13.1	10.78	14.35	4	1
High	Master Protein	A0A6C8HCR1	Tryptophan--tRNA ligase OS=Escherichia coli P0299917.1 OX=1116047 GN=trpS PE=3 SV=1	FALSE	24.312	16	5	8	5	334	37.4	6.74	11.8	5	1
High	Master Protein	D7XCZ2	ATP-dependent Clp protease proteolytic subunit OS=Escherichia coli MS 198-1 OX=749549 GN=clpP PE=3 SV=1	FALSE	24.267	38	4	8	4	194	21.7	5.82	17.17	4	1
High	Master Protein	A0A4D2R619	Universal stress protein OS=Escherichia coli OX=562 GN=uspC PE=3 SV=1	FALSE	24.138	32	3	6	3	142	15.6	5.24	19.95	3	1
High	Master Protein	sp	K1C9_HUMAN	TRUE	24.087	17	8	9	7	623	62.1	5.3	20.4	8	1
High	Master Protein	lcl	[locus_tag=EDL933_4521] [db_xref=GO:0003735,GO:0005622,GO:0005840,GO:0006412] [protein=LSU ribosomal protein L18p (L5e)] [protein_id=AIG70669.1] [location=complement(4267883..4268236)] [gbkey=CDS]	FALSE	23.984	54	6	13	6	117	12.8	10.42	24.91	6	1
High	Master Protein	F4NFN6	Glutathione S-transferase OS=Escherichia coli D9 OX=556266 GN=gst PE=4 SV=1	FALSE	23.951	41	7	10	7	199	22.6	5.91	16.3	7	1
High	Master Protein	A0A792X3Q6	PhnA family protein OS=Escherichia coli OX=562 GN=APX88_03770 PE=3 SV=1	FALSE	23.879	73	5	14	1	111	12.3	5	24.89	5	1
High	Master Protein	D3QJP1	Uncharacterized protein OS=Escherichia coli O55:H7 (strain CB9615 / EPEC) OX=701177 GN=G2583_2639 PE=4 SV=1	FALSE	23.878	33	3	10	2	115	12.5	5.86	17.79	3	1
High	Master Protein	lcl	[locus_tag=EDL933_4533] [db_xref=GO:0003735,GO:0005622,GO:0005840,GO:0006412] [protein=SSU ribosomal protein S19p (S15e)] [protein_id=AIG70681.1] [location=complement(4272887..4273036)] [gbkey=CDS]	FALSE	23.847	55	2	8	1	49	5.4	10.11	5.94	2	1
High	Master Protein	A0A3W2ZKX4	ATP synthase subunit delta OS=Escherichia coli OX=562 GN=atpH PE=3 SV=1	FALSE	23.836	42	5	5	5	177	19.4	5.02	17.05	5	1
High	Master Protein	A0A7I8ZTE4	YcgM protein OS=Escherichia coli OX=562 GN=ycgM PE=4 SV=1	FALSE	23.719	26	3	6	1	219	23.6	6.52	13.9	3	1
High	Master Protein	A0A6G3HJC3	Anaerobic glycerol-3-phosphate dehydrogenase subunit C (Fragment) OS=Escherichia coli OX=562 GN=glpC PE=4 SV=1	FALSE	23.696	22	7	8	7	384	42.7	8.66	16.49	7	1
High	Master Protein	B7ML09	Outer membrane protein W OS=Escherichia coli O45:K1 (strain S88 / ExPEC) OX=585035 GN=ompW PE=4 SV=1	FALSE	23.598	16	3	8	1	212	22.9	7.06	13.11	3	1
High	Master Protein	A0A2W6Q516	Ribosome-binding membrane protein YqjD (Fragment) OS=Escherichia coli OX=562 GN=yqjD PE=4 SV=1	FALSE	23.507	44	3	4	3	78	8.8	7.42	14.76	3	1
High	Master Protein	A0A454A329	Anti-sigma-28 factor OS=Escherichia coli O6:K15:H31 (strain 536 / UPEC) OX=362663 GN=ECP_1063 PE=3 SV=1	FALSE	23.483	72	5	9	5	97	10.4	5.45	17.54	5	1
High	Master Protein	D7Y388	PsiF repeat protein OS=Escherichia coli (strain MS 115-1) OX=749537 GN=HMPREF9540_02034 PE=4 SV=1	FALSE	23.385	29	3	8	3	112	12.4	9.82	14.67	3	1
High	Master Protein	A0A143E7L8	Uncharacterized protein OS=Escherichia coli OX=562 GN=ARC77_00265 PE=4 SV=1	FALSE	23.355	53	3	8	3	112	12.2	8.46	19.26	3	1
High	Master Protein	A0A4D3MII4	Inosine-5'-monophosphate dehydrogenase OS=Escherichia coli OX=562 GN=guaB PE=3 SV=1	FALSE	23.339	24	6	7	6	488	52	6.35	9.3	6	1
High	Master Protein	A0A6G4BP77	Flavodoxin OS=Escherichia coli OX=562 GN=G4V05_09770 PE=4 SV=1	FALSE	23.339	34	3	6	3	149	16.3	4.17	10.79	3	1
High	Master Protein	A0A0E0U195	Neutral zinc metallopeptidase OS=Escherichia coli UMNK88 OX=696406 GN=UMNK88_3070 PE=4 SV=1	FALSE	23.235	31	6	7	6	287	31.4	5.67	13.86	6	1
High	Master Protein	D8ADF8	Molybdenum cofactor biosynthesis protein B OS=Escherichia coli (strain MS 21-1) OX=749527 GN=moaB PE=3 SV=1	FALSE	23.227	36	5	8	5	170	18.7	6.1	16.5	5	1
High	Master Protein	A0A023YSF1	Aminoacyl-histidine dipeptidase (Peptidase D) OS=Escherichia coli O145:H28 (strain RM12581) OX=1248823 GN=pepD PE=4 SV=1	FALSE	23.18	20	7	8	7	485	52.9	5.39	12.85	7	1
High	Master Protein	A0A5C8YSQ5	Fumarylacetoacetate hydrolase family protein OS=Escherichia coli OX=562 GN=FV438_12505 PE=4 SV=1	FALSE	23.152	26	3	6	1	219	23.7	6.52	13.16	3	1
High	Master Protein	A0A0L6Y2Z4	Exodeoxyribonuclease 7 small subunit OS=Escherichia coli OX=562 GN=xseB PE=3 SV=1	FALSE	23.152	48	3	5	3	80	9	4.41	13.53	3	1
High	Master Protein	A0A0K9T8C2	ATP-dependent dethiobiotin synthetase BioD OS=Escherichia coli M114 OX=656416 GN=bioD PE=3 SV=1	FALSE	23.137	16	3	8	3	231	25	6.55	10.93	3	1
High	Master Protein	E6BEX8	Spheroplast protein Y OS=Escherichia coli MS 85-1 OX=679202 GN=spy PE=3 SV=1	FALSE	23.053	35	6	9	6	161	18.2	9.66	17.68	6	1
High	Master Protein	D6IAN5	BOF domain-containing protein OS=Escherichia coli B185 OX=550676 GN=ECDG_01441 PE=4 SV=1	FALSE	22.983	45	4	8	4	130	14.1	6.95	19.15	4	1
High	Master Protein	A0A1V2GJH1	Enoyl-[acyl-carrier-protein] reductase [NADH] FabI (Fragment) OS=Escherichia coli OX=562 GN=BXT93_06955 PE=3 SV=1	FALSE	22.894	36	5	8	5	202	21.5	6.33	14	5	1
High	Master Protein	lcl	[locus_tag=EDL933_1078] [protein=Tellurium resistance protein TerD] [protein_id=AIG67277.1] [location=1102753..1103328] [gbkey=CDS]	FALSE	22.816	36	4	5	4	191	20.5	4.87	11.6	4	1
High	Master Protein	A0A3Y4XXU7	UPF0181 protein YoaH OS=Escherichia coli OX=562 GN=yoaH PE=3 SV=1	FALSE	22.816	64	2	4	2	59	6.6	4.65	11.26	2	1
High	Master Protein	D8A9Q3	ATP-dependent 6-phosphofructokinase OS=Escherichia coli (strain MS 21-1) OX=749527 GN=pfkA PE=3 SV=1	FALSE	22.626	19	5	10	5	340	37.1	6.2	18.2	5	1
High	Master Protein	A0A7U9BP66	Hydrolase OS=Escherichia coli H299 OX=656393 GN=ECOG_04456 PE=4 SV=1	FALSE	22.599	14	5	9	5	455	50.5	5.96	22.11	5	1
High	Master Protein	V0UP01	S-adenosylmethionine decarboxylase proenzyme OS=Escherichia coli 908519 OX=1268991 GN=speD PE=3 SV=1	FALSE	22.582	25	5	6	5	264	30.4	5.39	15.14	5	1
High	Master Protein	A0A0E0U0L3	NADH-quinone oxidoreductase OS=Escherichia coli UMNK88 OX=696406 GN=nuoG PE=3 SV=1	FALSE	22.533	10	6	6	6	908	100.3	6.25	12.95	6	1
High	Master Protein	C3T885	LysM peptidoglycan-binding domain-containing protein OS=Escherichia coli OX=562 GN=ECs2385 PE=3 SV=1	FALSE	22.44	22	4	9	1	334	36.1	9.51	24.34	4	1
High	Master Protein	E1J6I8	Putative glucose-6-phosphate 1-epimerase OS=Escherichia coli MS 124-1 OX=679205 GN=HMPREF9347_02526 PE=3 SV=1	FALSE	22.44	25	5	7	1	301	33.5	6.4	13.42	5	1
High	Master Protein	lcl	[locus_tag=EDL933_5573] [db_xref=GO:0004427] [protein=Inorganic pyrophosphatase] [protein_id=AIG71712.1] [location=complement(5353468..5353998)] [gbkey=CDS]	FALSE	22.44	34	6	10	6	176	19.7	5.17	17.13	6	1
High	Master Protein	A0A244BM86	Ferritin OS=Escherichia coli OX=562 GN=ftnA PE=3 SV=1	FALSE	22.351	33	4	7	4	165	19.4	4.83	17.47	4	1
High	Master Protein	V0Z2I1	Iron uptake system component EfeO OS=Escherichia coli 908573 OX=1268998 GN=HMPREF1611_02293 PE=3 SV=1	FALSE	22.238	21	6	7	6	375	41.1	5.17	7.78	6	1
High	Master Protein	Q8X5R7	Putative membrane protein OS=Escherichia coli O157:H7 OX=83334 GN=yhiI PE=4 SV=2	FALSE	22.218	17	6	9	6	355	38.8	6.86	21.81	6	1
High	Master Protein	A0A2T1LPQ6	30S ribosomal protein S20 OS=Escherichia coli OX=562 GN=rpsT PE=3 SV=1	FALSE	22.09	34	3	16	3	87	9.7	11.18	27.36	3	1
High	Master Protein	D8A7U2	Methylglyoxal synthase OS=Escherichia coli (strain MS 21-1) OX=749527 GN=mgsA PE=3 SV=1	FALSE	21.975	32	2	3	2	155	17.3	6.64	7.49	2	1
High	Master Protein	A0A6M0PJ07	50S ribosomal protein L32 OS=Escherichia coli OX=562 GN=rpmF PE=3 SV=1	FALSE	21.965	46	3	10	3	57	6.4	11	14.86	3	1
High	Master Protein	A0A5C8XMP2	Tyrosine--tRNA ligase OS=Escherichia coli OX=562 GN=tyrS PE=3 SV=1	FALSE	21.892	18	6	9	6	424	47.6	5.81	14.65	6	1
High	Master Protein	A0A070V2Q8	ABC_trans_aux domain-containing protein OS=Escherichia coli 2-177-06_S3_C2 OX=1444151 GN=AC16_0582 PE=4 SV=1	FALSE	21.705	31	3	3	3	182	20	5.21	11.55	3	1
High	Master Protein	A0A7B2BJT0	Uroporphyrinogen-III C-methyltransferase OS=Escherichia coli OX=562 GN=hemX PE=4 SV=1	FALSE	21.68	29	9	11	1	399	43.5	4.78	11.73	9	1
High	Master Protein	Q9JN24	Peptide deformylase OS=Escherichia coli OX=562 GN=def PE=3 SV=1	FALSE	21.67	37	4	4	4	150	16.9	5.14	13.32	4	1
High	Master Protein	A0A5D1FLT1	Aspartate carbamoyltransferase OS=Escherichia coli OX=562 GN=pyrB PE=3 SV=1	FALSE	21.551	27	7	7	7	311	34.4	6.76	13.53	7	1
High	Master Protein	A0A454RLU9	50S ribosomal protein L15 OS=Escherichia coli OX=562 GN=rplO PE=3 SV=1	FALSE	21.497	42	5	8	5	144	15	11.18	11.89	5	1
High	Master Protein	A0A1X1LUS8	Putative glucose-6-phosphate 1-epimerase OS=Escherichia coli OX=562 GN=BHS87_10070 PE=3 SV=1	FALSE	21.497	26	5	7	1	294	32.6	6.14	13.42	5	1
High	Master Protein	A0A4C4ZJ07	50S ribosomal protein L5 OS=Escherichia coli OX=562 GN=rplE PE=3 SV=1	FALSE	21.317	35	5	7	5	179	20.3	9.48	15.45	5	1
High	Master Protein	A0A6H3MQT9	2-C-methyl-D-erythritol 4-phosphate cytidylyltransferase OS=Escherichia coli OX=562 GN=ispD PE=3 SV=1	FALSE	21.297	32	5	5	5	236	25.7	6.6	11.47	5	1
High	Master Protein	A0A3L9DHP4	Thioredoxin peroxidase OS=Escherichia coli OX=562 GN=bcp PE=4 SV=1	FALSE	21.274	40	5	8	5	156	17.6	5.38	11.52	5	1
High	Master Protein	A0A222QLU3	YkuD multi-domain protein OS=Escherichia coli NCCP15648 OX=1200752 GN=A610_2009 PE=3 SV=1	FALSE	21.127	22	4	10	1	334	36	9.41	20.93	4	1
High	Master Protein	extdb	phnA family protein [Escherichia coli]	FALSE	21.116	73	5	14	1	111	12.3	5.12	24.89	5	1
High	Master Protein	lcl	[locus_tag=EDL933_3260] [protein=hypothetical protein] [protein_id=AIG69426.1] [location=3021839..3022120] [gbkey=CDS]	FALSE	21.031	34	3	9	3	93	10.3	4.88	21.5	3	1
High	Master Protein	A0A6M0PN65	Cell division topological specificity factor OS=Escherichia coli OX=562 GN=minE PE=3 SV=1	FALSE	20.947	69	6	7	6	89	10.3	5.24	11.07	6	1
High	Master Protein	V0X6W0	LysM domain-containing protein OS=Escherichia coli 908525 OX=1268995 GN=HMPREF1608_04317 PE=3 SV=1	FALSE	20.934	22	4	9	1	334	36	9.41	20.93	4	1
High	Master Protein	A0A1X3KJV4	50S ribosomal protein L25 OS=Escherichia coli H605 OX=656410 GN=rplY PE=3 SV=1	FALSE	20.934	47	4	10	4	94	10.7	9.6	20.95	4	1
High	Master Protein	A0A2I5STV1	Transcription elongation factor GreA OS=Escherichia coli OX=562 GN=greA PE=3 SV=1	FALSE	20.531	33	5	7	5	158	17.6	4.84	9.27	5	1
High	Master Protein	sp	DHE3_BOVIN	TRUE	20.525	12	7	10	7	558	61.5	7.59	9.97	7	1
High	Master Protein	H4L9L2	Glutathione S-transferase OS=Escherichia coli DEC2E OX=868142 GN=yliJ PE=4 SV=1	FALSE	20.416	40	6	6	6	192	21.8	4.94	12.51	6	1
High	Master Protein	A0A5N3D5X6	Class I fructose-bisphosphate aldolase OS=Escherichia coli OX=562 GN=fbaB PE=4 SV=1	FALSE	20.402	23	6	8	6	350	38.1	6.73	8.92	6	1
High	Master Protein	lcl	[locus_tag=EDL933_4821] [protein=Cold shock protein CspA] [protein_id=AIG70962.1] [location=4555247..4555459] [gbkey=CDS]	FALSE	20.304	67	4	11	4	70	7.4	5.95	19.92	4	1
High	Master Protein	D7Y1J3	Peptidase, S41 family OS=Escherichia coli (strain MS 115-1) OX=749537 GN=prc PE=3 SV=1	FALSE	20.215	9	6	8	6	682	76.6	6.55	16.83	6	1
High	Master Protein	A0A6C9I847	Lipopolysaccharide export system protein LptA OS=Escherichia coli OX=562 GN=lptA PE=3 SV=1	FALSE	20.083	24	3	6	3	185	20.1	8.98	14.77	3	1
High	Master Protein	A0A4S1PUR1	DUF406 family protein OS=Escherichia coli OX=562 GN=yfcZ PE=3 SV=1	FALSE	20.04	28	2	5	2	94	10.3	4.36	13.07	2	1
High	Master Protein	A0A1X3J022	Iron-sulfur cluster carrier protein OS=Escherichia coli TA447 OX=656447 GN=ECXG_00555 PE=3 SV=1	FALSE	20.016	15	5	6	5	379	41.1	6.52	12.52	5	1
High	Master Protein	sp	PRDX1_HUMAN	TRUE	19.926	20	5	7	5	199	22.1	8.13	13.52	5	1
High	Master Protein	C3SEJ8	Uncharacterized protein OS=Escherichia coli OX=562 GN=ECs5298 PE=3 SV=1	FALSE	19.92	14	3	3	3	390	43.6	5.54	9.29	3	1
High	Master Protein	A0A789BRA1	Lipoprotein OS=Escherichia coli OX=562 GN=WP7S17E04_12990 PE=3 SV=1	FALSE	19.877	18	3	4	3	251	28	5.05	12.5	3	1
High	Master Protein	A0A6N7N6W5	30S ribosomal protein S15 OS=Escherichia coli OX=562 GN=rpsO PE=3 SV=1	FALSE	19.875	53	3	8	3	89	10.3	10.18	17.02	3	1
High	Master Protein	A0A5B1F526	Dimethylsulfoxide reductase subunit B OS=Escherichia coli OX=562 GN=dmsB PE=4 SV=1	FALSE	19.499	27	4	5	3	205	22.8	6.61	12.25	4	1
High	Master Protein	A0A5E9RNB8	LPS O-antigen chain length determinant protein WzzB OS=Escherichia coli OX=562 GN=wzzB PE=4 SV=1	FALSE	19.421	12	4	5	4	325	36.2	5.59	12.46	4	1
High	Master Protein	A0A0K4QZI9	UPF0438 protein YifE OS=Escherichia coli OX=562 GN=yifE PE=3 SV=1	FALSE	19.412	56	6	11	6	112	13.1	6.55	17.56	6	1
High	Master Protein	A0A073FT15	UDP-4-amino-4-deoxy-L-arabinose--oxoglutarate aminotransferase OS=Escherichia coli 2-427-07_S4_C3 OX=1444266 GN=arnB PE=3 SV=1	FALSE	19.391	21	5	6	5	379	41.6	6.71	10.4	5	1
High	Master Protein	A0A2I7QGY0	Lipoprotein OS=Escherichia coli OX=562 GN=ygiB PE=4 SV=1	FALSE	19.343	21	4	8	4	191	19.8	8.05	16.76	4	1
High	Master Protein	A0A5F1VCC7	Multifunctional acyl-CoA thioesterase I/protease I/lysophospholipase L1 OS=Escherichia coli OX=562 GN=tesA PE=4 SV=1	FALSE	19.274	25	4	6	4	210	23.9	7.58	13.32	4	1
High	Master Protein	A0A023Z6A4	Cytochrome c-552 OS=Escherichia coli O145:H28 (strain RM12581) OX=1248823 GN=nrfA PE=3 SV=1	FALSE	19.223	15	5	6	5	478	53.7	7.25	11.02	5	1
High	Master Protein	A0A026VAR9	NADPH quinone reductase MdaB OS=Escherichia coli O174:H8 str. 04-3038 OX=1446704 GN=BW70_07465 PE=4 SV=1	FALSE	19.149	30	4	5	4	193	21.8	6.54	13.86	4	1
High	Master Protein	E9XRN6	Entericidin EcnA/B family protein OS=Escherichia coli TW10509 OX=656449 GN=ERFG_03734 PE=3 SV=1	FALSE	19.079	40	1	7	1	48	4.8	8.21	17.19	1	1
High	Master Protein	D3QUE6	Acid stress chaperone HdeB OS=Escherichia coli O55:H7 (strain CB9615 / EPEC) OX=701177 GN=hdeB PE=3 SV=1	FALSE	19.016	27	2	8	2	112	12.5	7.12	10.83	2	1
High	Master Protein	A0A366YKU8	Shikimate kinase 1 OS=Escherichia coli OX=562 GN=aroK PE=3 SV=1	FALSE	18.991	31	4	5	4	173	19.5	5.34	9.27	4	1
High	Master Protein	A0A0K3UXP1	Periplasmic AppA protein [includes: phosphoanhydrid phosphohydrolase and 4-phytase] OS=Escherichia coli OX=562 GN=appA_2 PE=4 SV=1	FALSE	18.901	14	4	4	4	432	47.1	6.35	8.77	4	1
High	Master Protein	D7Y875	Acetyl-coenzyme A carboxylase carboxyl transferase subunit alpha OS=Escherichia coli (strain MS 115-1) OX=749537 GN=accA PE=3 SV=1	FALSE	18.817	13	3	4	3	319	35.3	6.04	7.67	3	1
High	Master Protein	A0A0K4GHQ6	Acid stress chaperone HdeA OS=Escherichia coli OX=562 GN=hdeA PE=3 SV=1	FALSE	18.787	54	2	16	2	111	11.9	5.58	28.5	2	1
High	Master Protein	A0A6C9QFZ1	30S ribosomal protein S12 OS=Escherichia coli OX=562 GN=rpsL PE=3 SV=1	FALSE	18.675	31	5	7	5	124	13.7	10.87	17.09	5	1
High	Master Protein	A0A3L4X506	Uncharacterized protein OS=Escherichia coli OX=562 GN=CQP61_12555 PE=4 SV=1	FALSE	18.667	44	1	2	1	66	7.1	4.35	2.58	1	1
High	Master Protein	A0A0K3Z0I1	Signal recognition particle receptor FtsY OS=Escherichia coli OX=562 GN=ftsY PE=3 SV=1	FALSE	18.54	22	6	7	6	498	54.7	4.49	9.56	6	1
High	Master Protein	Q8XAD5	Uncharacterized protein OS=Escherichia coli O157:H7 OX=83334 GN=ECs_2280 PE=1 SV=2	FALSE	18.38	67	2	4	2	63	7.5	8.62	8.14	2	1
High	Master Protein	A0A3U9M071	Ribonuclease I OS=Escherichia coli OX=562 GN=D6D43_17210 PE=3 SV=1	FALSE	18.249	31	5	5	5	268	29.6	8.43	8.99	5	1
High	Master Protein	A0A271R3I6	Phosphoesterase OS=Escherichia coli OX=562 GN=BIZ41_10320 PE=3 SV=1	FALSE	18.204	23	3	5	3	184	20.1	6.05	8.05	3	1
High	Master Protein	A0A6M1IFZ6	L,D-transpeptidase OS=Escherichia coli OX=562 GN=ldtB PE=3 SV=1	FALSE	18.119	19	3	4	1	306	33.3	6.4	9.58	3	1
High	Master Protein	A0A6M0PM99	Met repressor OS=Escherichia coli OX=562 GN=metJ PE=3 SV=1	FALSE	18.118	35	5	7	5	105	12.2	5.31	10.25	5	1
High	Master Protein	D7ZJL9	Transcriptional repressor FrmR OS=Escherichia coli MS 69-1 OX=749531 GN=frmR PE=3 SV=1	FALSE	18.006	36	3	4	3	107	12.2	6.11	7.85	3	1
High	Master Protein	D6J529	UPF0337 protein YjbJ OS=Escherichia coli B354 OX=550677 GN=ECEG_02698 PE=3 SV=1	FALSE	17.914	41	4	10	4	71	8.6	5.55	13.84	4	1
High	Master Protein	A0A792FKM7	4-hydroxy-3-methylbut-2-en-1-yl diphosphate synthase (flavodoxin) OS=Escherichia coli OX=562 GN=ispG PE=3 SV=1	FALSE	17.904	22	7	9	7	372	40.7	6.46	6.57	7	1
High	Master Protein	W8ZYH0	Glutathione reductase OS=Escherichia coli O25b:H4-ST131 OX=941322 GN=gorA PE=3 SV=1	FALSE	17.866	15	3	3	3	450	48.7	6	4.56	3	1
High	Master Protein	extdb	30S ribosomal protein S4 [Escherichia coli]	FALSE	17.204	25	4	4	4	206	23.5	10.05	10.73	4	1
High	Master Protein	B7MXK9	Uncharacterized protein OS=Escherichia coli O81 (strain ED1a) OX=585397 GN=ECED1_2644 PE=4 SV=1	FALSE	17.193	22	1	2	1	63	7.2	9.77	6.92	1	1
High	Master Protein	A0A0H3EFM9	Protein YceI OS=Escherichia coli O83:H1 (strain NRG 857C / AIEC) OX=685038 GN=yceI PE=3 SV=1	FALSE	17.167	31	5	5	5	191	20.9	6.57	10.67	5	1
High	Master Protein	A0A0K4M0D2	Molybdopterin synthase sulfur carrier subunit OS=Escherichia coli OX=562 GN=moaD PE=3 SV=1	FALSE	17.14	48	3	4	3	81	8.7	4.42	10.24	3	1
High	Master Protein	A0A3Q9VVK9	TerB OS=Escherichia coli O157 OX=1045010 GN=terB PE=4 SV=1	FALSE	17.122	28	4	6	4	151	16.7	5.43	10.21	4	1
High	Master Protein	A0A6G6L4A5	Hydroxyacylglutathione hydrolase OS=Escherichia coli OX=562 GN=gloB PE=3 SV=1	FALSE	17.067	32	4	4	4	251	28.4	6.06	9.16	4	1
High	Master Protein	A0A788TW54	Putative NAD(P)H nitroreductase OS=Escherichia coli OX=562 GN=ydjA PE=3 SV=1	FALSE	17.012	30	4	6	4	183	20	7.34	10.28	4	1
High	Master Protein	A0A1X3KIH0	Single-stranded DNA-binding protein OS=Escherichia coli H605 OX=656410 GN=EATG_02228 PE=3 SV=1	FALSE	16.908	35	5	8	5	178	18.9	5.58	16.82	5	1
High	Master Protein	A0A792SZI7	Monooxygenase OS=Escherichia coli OX=562 GN=APX88_03270 PE=4 SV=1	FALSE	16.894	44	4	7	1	101	11.3	5	14.09	4	1
High	Master Protein	A0A376I3F2	Osmotically inducible lipoprotein E OS=Escherichia coli OX=562 GN=osmE PE=4 SV=1	FALSE	16.879	35	3	9	1	113	12.1	7.87	15.34	3	1
High	Master Protein	A0A6C9QH07	Integration host factor subunit beta OS=Escherichia coli OX=562 GN=ihfB PE=3 SV=1	FALSE	16.802	37	3	9	3	89	10.1	9.41	21.66	3	1
High	Master Protein	A0A7U9B6G6	Putative deoxyribonuclease YcfH OS=Escherichia coli TA143 OX=656437 GN=ECMG_02239 PE=4 SV=1	FALSE	16.732	23	4	4	4	265	29.8	5.52	12.54	4	1
High	Master Protein	sp	ALBU_HUMAN	TRUE	16.675	7	5	12	2	609	69.3	6.28	27.86	5	1
High	Master Protein	A0A5N3D643	Quinone-dependent D-lactate dehydrogenase OS=Escherichia coli OX=562 GN=dld PE=3 SV=1	FALSE	16.653	12	6	6	6	571	64.6	6.7	10.53	6	1
High	Master Protein	A0A7U9FTC2	Dimethylsulfoxide reductase, chain B OS=Escherichia coli TA206 OX=656440 GN=ECKG_04728 PE=4 SV=1	FALSE	16.636	20	3	6	2	205	22.7	6.4	8.58	3	1
High	Master Protein	A0A7A0MYH2	Glutaredoxin 2 OS=Escherichia coli OX=562 GN=grxB PE=4 SV=1	FALSE	16.543	18	2	2	2	215	24.3	7.96	7.97	2	1
High	Master Protein	A0A400LGT2	Glutathionylspermidine synthase preATP-grasp family protein OS=Escherichia coli OX=562 GN=ygiC PE=4 SV=1	FALSE	16.501	12	4	5	4	386	45	4.77	10.09	4	1
High	Master Protein	lcl	[locus_tag=EDL933_5546] [db_xref=GO:0003735,GO:0005622,GO:0005840,GO:0006412] [protein=SSU ribosomal protein S18p, zinc-independent] [protein_id=AIG71685.1] [location=5328431..5328658] [gbkey=CDS]	FALSE	16.44	40	3	4	3	75	9	10.59	5.42	3	1
High	Master Protein	A0A0K4PXE6	Universal stress protein OS=Escherichia coli OX=562 GN=uspD PE=3 SV=1	FALSE	16.391	34	3	27	1	142	16.3	6.42	37.21	3	1
High	Master Protein	D3QSW8	Biotin carboxyl carrier protein of acetyl-CoA carboxylase OS=Escherichia coli O55:H7 (strain CB9615 / EPEC) OX=701177 GN=accB PE=4 SV=1	FALSE	16.339	20	2	3	2	156	16.7	4.81	10.52	2	1
High	Master Protein	A0A0F3U9K3	HAD-IIA family hydrolase OS=Escherichia coli OX=562 GN=C9Z23_01185 PE=4 SV=1	FALSE	16.23	26	4	4	4	250	27.2	5.41	9.82	4	1
High	Master Protein	A0A061KQV5	Mechanosensitive channel MscK OS=Escherichia coli OX=562 GN=mscK PE=3 SV=1	FALSE	16.196	6	5	5	5	1120	127.1	8.03	6.32	5	1
High	Master Protein	A0A271UJE1	UPF0434 protein YcaR OS=Escherichia coli OX=562 GN=ycaR PE=3 SV=1	FALSE	16.184	42	2	4	2	60	6.8	5.01	11.29	2	1
High	Master Protein	A0A3Y3V6F0	Bifunctional protein FolD OS=Escherichia coli OX=562 GN=folD PE=3 SV=1	FALSE	16.173	13	4	7	4	288	31	6.09	13.82	4	1
High	Master Protein	A0A7U8LR82	Molecular chaperone DnaJ OS=Escherichia coli O11 OX=1095705 GN=dnaJ PE=4 SV=1	FALSE	16.151	15	4	5	4	371	40.6	7.84	5.96	4	1
High	Master Protein	lcl	[locus_tag=EDL933_5257] [protein=Putative cytoplasmic protein] [protein_id=AIG71396.1] [location=5006202..5006441] [gbkey=CDS]	FALSE	16.077	65	4	11	1	79	9.4	4.67	14.39	4	1
High	Master Protein	A0A2W6PDZ0	2-amino-3-ketobutyrate coenzyme A ligase OS=Escherichia coli OX=562 GN=kbl PE=3 SV=1	FALSE	16.032	16	5	5	5	398	43.1	5.83	11.09	5	1
High	Master Protein	A0A0F3SKW2	DNA-damage-inducible protein DinI OS=Escherichia coli OX=562 GN=dinI_2 PE=4 SV=1	FALSE	16.021	37	3	5	3	82	9.4	5.58	14.29	3	1
High	Master Protein	A0A376SXV3	Regulator of ribonuclease activity A OS=Escherichia coli OX=562 GN=rraA PE=3 SV=1	FALSE	15.864	32	4	4	4	197	22	5.02	8.81	4	1
High	Master Protein	D3QWD7	Ribosomal RNA small subunit methyltransferase G OS=Escherichia coli O55:H7 (strain CB9615 / EPEC) OX=701177 GN=gidB PE=3 SV=1	FALSE	15.851	21	4	7	4	207	23.4	6.54	13.22	4	1
High	Master Protein	F4VMD0	Divalent-cation tolerance protein CutA OS=Escherichia coli H591 OX=656408 GN=cutA PE=3 SV=1	FALSE	15.819	45	3	3	3	114	12.6	4.96	8.89	3	1
High	Master Protein	B7MQS3	Uncharacterized protein OS=Escherichia coli O81 (strain ED1a) OX=585397 GN=ybiS PE=3 SV=1	FALSE	15.798	19	3	4	1	306	33.3	6.7	8.82	3	1
High	Master Protein	sp	HBA_HUMAN	TRUE	15.785	19	2	5	2	141	15.1	8.68	15.99	2	1
High	Master Protein	A0A7U9FZE9	Putative alpha helix protein (Fragment) OS=Escherichia coli TA143 OX=656437 GN=ECMG_00654 PE=4 SV=1	FALSE	15.78	31	3	8	3	98	11.6	9.36	12.31	3	1
High	Master Protein	A0A2T1LEM2	50S ribosomal protein L14 OS=Escherichia coli OX=562 GN=rplN PE=3 SV=1	FALSE	15.736	37	3	5	3	123	13.6	10.42	12.82	3	1
High	Master Protein	A0A5P0J5T2	Cytoskeleton protein RodZ OS=Escherichia coli OX=562 GN=rodZ PE=3 SV=1	FALSE	15.73	13	3	4	3	337	36.2	5.74	6.8	3	1
High	Master Protein	A0A1Y2XXE3	Capsule biosynthesis GfcC family protein OS=Escherichia coli OX=562 GN=gfcC PE=4 SV=1	FALSE	15.7	23	4	5	4	248	27.2	5.8	6.96	4	1
High	Master Protein	A0A192CCN1	HtrG OS=Escherichia coli O25b:H4 OX=941280 GN=EWT55_06230 PE=4 SV=1	FALSE	15.669	23	3	5	3	206	23.2	9.31	8.06	3	1
High	Master Protein	Q1RG65	Carbonic anhydrase OS=Escherichia coli (strain UTI89 / UPEC) OX=364106 GN=yadF PE=3 SV=1	FALSE	15.62	21	4	4	4	220	25.1	6.65	8.13	4	1
High	Master Protein	A0A3Z6G9Z0	Putative cation transport regulator ChaB OS=Escherichia coli OX=562 GN=chaB PE=4 SV=1	FALSE	15.619	26	2	5	2	88	10.3	9.09	5.37	2	1
High	Master Protein	A0A6C7CL09	DNA-binding protein YbiB OS=Escherichia coli OX=562 GN=trpD2 PE=4 SV=1	FALSE	15.611	16	4	4	3	320	35	6.86	8.51	4	1
High	Master Protein	A0A7U8R3U9	Transcription factor OS=Escherichia coli O157:H7 OX=83334 GN=Z3269 PE=4 SV=1	FALSE	15.559	47	4	6	4	79	8.9	8.75	11.26	4	1
High	Master Protein	A0A7U9BPF3	Bor protein lambdoid prophage DLP12-like protein OS=Escherichia coli H299 OX=656393 GN=ECOG_05437 PE=4 SV=1	FALSE	15.541	26	2	6	2	97	10.5	9.22	7.43	2	1
High	Master Protein	G7ZU81	rRNA N-glycosylase (Fragment) OS=Escherichia coli OX=562 GN=stx1 PE=4 SV=1	FALSE	15.532	20	4	4	4	209	23.2	9.76	9.08	4	1
High	Master Protein	A0A2T3T1K7	Citrate lyase acyl carrier protein OS=Escherichia coli OX=562 GN=citD PE=3 SV=1	FALSE	15.513	38	3	5	3	98	10.7	4.81	10.83	3	1
High	Master Protein	A0A3J1F3U4	Type III secretion system LEE translocon pore-forming subunit EspD OS=Escherichia coli OX=562 GN=ED648_26285 PE=4 SV=1	FALSE	15.467	11	3	3	3	374	39.1	5.38	9.84	3	1
High	Master Protein	C3SJ47	CDP-diacylglycerol phosphotidylhydrolase OS=Escherichia coli OX=562 GN=sbp PE=3 SV=1	FALSE	15.393	14	4	4	4	329	36.7	7.15	8.43	4	1
High	Master Protein	A0A0K3S386	30S ribosomal protein S22 OS=Escherichia coli OX=562 GN=rpsV PE=3 SV=1	FALSE	15.376	58	4	7	4	45	5.1	11.5	15.26	4	1
High	Master Protein	A0A0K4A6Y0	Transcriptional regulator PchABC-homolog OS=Escherichia coli OX=562 GN=ERS085366_05098 PE=4 SV=1	FALSE	15.372	36	4	5	4	104	12	10.32	10.13	4	1
High	Master Protein	A0A193LYE6	Uncharacterized protein OS=Escherichia coli OX=562 GN=GJ11_21665 PE=4 SV=1	FALSE	15.369	23	3	7	3	134	14.5	5.81	9.65	3	1
High	Master Protein	F4NHV3	Ribosome-binding factor A OS=Escherichia coli D9 OX=556266 GN=rbfA PE=3 SV=1	FALSE	15.354	26	3	5	3	139	15.8	5.68	12.1	3	1
High	Master Protein	A0A4T4Z8E0	UPF0307 protein YjgA OS=Escherichia coli OX=562 GN=yjgA PE=3 SV=1	FALSE	15.243	27	4	6	4	181	21.1	5.82	12.71	4	1
High	Master Protein	A0A140JXX6	Component of T3SS OS=Escherichia coli OX=562 PE=4 SV=1	FALSE	15.194	26	3	7	3	107	12.3	9.45	13.2	3	1
High	Master Protein	A0A3T4J2W9	Hypothetical protein OS=Escherichia coli OX=562 GN=EBP16_11175 PE=4 SV=1	FALSE	15.137	22	5	5	5	313	32.7	5.6	8.76	5	1
High	Master Protein	A0A6M9QL35	Ribulose-phosphate 3-epimerase OS=Escherichia coli OX=562 GN=rpe PE=3 SV=1	FALSE	14.978	19	2	3	2	225	24.5	5.31	6.57	2	1
High	Master Protein	A0A4D7UU40	Zinc-binding dehydrogenase OS=Escherichia coli OX=562 GN=C9E67_24100 PE=3 SV=1	FALSE	14.954	11	3	5	3	349	38	6.29	10.07	3	1
High	Master Protein	A0A0L7AGV2	Succinate dehydrogenase flavoprotein subunit OS=Escherichia coli OX=562 GN=sdhA PE=3 SV=1	FALSE	14.913	11	4	4	4	588	64.4	6.27	8.47	4	1
High	Master Protein	B7VEN4	Attaching and effacing protein OS=Escherichia coli OX=562 GN=eae PE=3 SV=1	FALSE	14.894	7	4	5	1	935	101.6	8.72	9.19	4	1
High	Master Protein	A0A073GZD9	TolA C-terminal family protein OS=Escherichia coli 5-366-08_S1_C3 OX=1444102 GN=AB67_5258 PE=4 SV=1	FALSE	14.867	23	3	8	3	131	14.6	8.98	13.22	3	1
High	Master Protein	A0A2A3V795	MOSC domain-containing protein OS=Escherichia coli OX=562 GN=COD46_16450 PE=4 SV=1	FALSE	14.807	23	4	8	4	224	25.4	6.23	10.44	4	1
High	Master Protein	A0A426NBT0	ClpXP protease specificity-enhancing factor OS=Escherichia coli OX=562 GN=sspB PE=4 SV=1	FALSE	14.672	24	3	5	3	165	18.3	4.55	6.59	3	1
High	Master Protein	D6J5B2	HTH-type transcriptional regulator yjdC OS=Escherichia coli B354 OX=550677 GN=ECEG_02784 PE=4 SV=1	FALSE	14.65	24	4	4	4	191	22	5.17	10.21	4	1
High	Master Protein	A0A271R4N6	Uncharacterized lipoprotein YifL OS=Escherichia coli OX=562 GN=BIZ41_08775 PE=4 SV=1	FALSE	14.576	45	2	4	2	67	7.2	8.79	5.98	2	1
High	Master Protein	A0A377KG86	Acetolactate synthase OS=Escherichia coli OX=562 GN=ybl178 PE=3 SV=1	FALSE	14.556	20	4	4	4	300	32.7	6.92	7.2	4	1
High	Master Protein	sp	K22E_HUMAN	TRUE	14.516	7	4	5	4	645	65.8	8	9.4	4	1
High	Master Protein	A0A6G6L612	UPF0194 membrane protein YbhG OS=Escherichia coli OX=562 GN=hlyD PE=3 SV=1	FALSE	14.413	19	4	5	4	332	36.5	5.35	13.03	4	1
High	Master Protein	A0A271QS67	Uncharacterized protein OS=Escherichia coli OX=562 GN=BIZ41_20255 PE=4 SV=1	FALSE	14.409	22	2	6	2	104	11.6	5.39	6.33	2	1
High	Master Protein	A0A193LNB2	Cys-tRNA(Pro)/Cys-tRNA(Cys) deacylase OS=Escherichia coli OX=562 GN=GJ11_02835 PE=3 SV=1	FALSE	14.3	25	3	4	3	159	17.1	9.04	11.9	3	1
High	Master Protein	A0A7D5GRR9	50S ribosomal protein L21 OS=Escherichia coli OX=562 GN=rplU PE=3 SV=1	FALSE	14.238	21	2	6	2	103	11.6	10.05	14.11	2	1
High	Master Protein	A0A377CQJ1	Insulinase family protein OS=Escherichia coli OX=562 GN=yhjJ PE=3 SV=1	FALSE	14.141	7	3	4	3	498	55.5	6.02	8.12	3	1
High	Master Protein	A0A2S8JVP3	FMN dependent NADH:quinone oxidoreductase OS=Escherichia coli OX=562 GN=azoR PE=3 SV=1	FALSE	14.133	20	3	3	3	201	21.7	5.11	9.13	3	1
High	Master Protein	V0YEJ4	Ribosomal protein S16 (Fragment) OS=Escherichia coli 908525 OX=1268995 GN=HMPREF1608_00705 PE=4 SV=1	FALSE	14.104	61	3	7	3	57	6.3	8.73	12.37	3	1
High	Master Protein	A0A787WHP0	Imidazole glycerol phosphate synthase subunit HisF OS=Escherichia coli OX=562 GN=hisF PE=3 SV=1	FALSE	14.036	17	4	4	4	258	28.4	5.2	6.67	4	1
High	Master Protein	A0A246NUH0	DUF1508 domain-containing protein OS=Escherichia coli OX=562 GN=B7C53_14240 PE=3 SV=1	FALSE	14.014	30	3	4	3	110	12.1	9.6	8.54	3	1
High	Master Protein	A0A5B9S930	50S ribosomal protein L4 OS=Escherichia coli OX=562 GN=rplD PE=3 SV=1	FALSE	13.974	19	4	6	1	201	22.1	9.63	13.13	4	1
High	Master Protein	A0A4Q0CSM9	Metalloprotease TldD OS=Escherichia coli OX=562 GN=tldD PE=3 SV=1	FALSE	13.945	14	3	4	3	481	51.2	5.06	6.31	3	1
High	Master Protein	lcl	[locus_tag=EDL933_1347] [protein=Phage protein] [protein_id=AIG67541.1] [location=complement(1335245..1335544)] [gbkey=CDS]	FALSE	13.918	46	3	4	3	99	11	5.5	7.84	3	1
High	Master Protein	V0VG09	Hypoxanthine phosphoribosyltransferase OS=Escherichia coli 908519 OX=1268991 GN=HMPREF1604_04693 PE=3 SV=1	FALSE	13.891	20	3	4	3	182	20.5	5.1	12	3	1
High	Master Protein	A0A0H3EPS6	Uncharacterized protein OS=Escherichia coli O83:H1 (strain NRG 857C / AIEC) OX=685038 GN=NRG857_15415 PE=4 SV=1	FALSE	13.875	21	5	8	5	122	13.9	9.11	16.55	5	1
High	Master Protein	A0A2G8ZRV2	Alpha/beta hydrolase OS=Escherichia coli OX=562 GN=ycjY_2 PE=4 SV=1	FALSE	13.804	21	4	5	4	306	33.5	5.01	7.54	4	1
High	Master Protein	C3TCM7	Thymidine kinase OS=Escherichia coli OX=562 GN=tdk PE=3 SV=1	FALSE	13.741	26	3	3	3	205	23.4	7.36	6.21	3	1
High	Master Protein	A0A0K4B4I8	Protein YciE OS=Escherichia coli OX=562 GN=yciE_2 PE=4 SV=1	FALSE	13.73	18	2	2	2	168	19	5.14	6.45	2	1
High	Master Protein	A0A5E9RQI7	Sulfur carrier protein TusA OS=Escherichia coli OX=562 GN=tusA PE=3 SV=1	FALSE	13.691	42	2	2	2	81	9.1	5.39	6.95	2	1
High	Master Protein	A0A3Y4Y005	50S ribosomal protein L28 OS=Escherichia coli OX=562 GN=rpmB PE=3 SV=1	FALSE	13.662	32	3	5	3	78	9	11.41	12.02	3	1
High	Master Protein	A0A7A0MX38	Cytochrome c nitrite reductase Fe-S protein OS=Escherichia coli OX=562 GN=nrfC PE=4 SV=1	FALSE	13.643	18	3	5	3	223	24.6	8.63	10.15	3	1
High	Master Protein	A0A0H3EI74	N-methyl-L-tryptophan oxidase OS=Escherichia coli O83:H1 (strain NRG 857C / AIEC) OX=685038 GN=solA PE=3 SV=1	FALSE	13.607	15	4	4	4	372	40.9	5.36	9.17	4	1
High	Master Protein	E9TJ49	Peptidase T OS=Escherichia coli MS 117-3 OX=749539 GN=pepT PE=3 SV=1	FALSE	13.595	10	3	4	3	409	45	5.58	6.14	3	1
High	Master Protein	A0A3T8K3Z8	Beta-lactamase OS=Escherichia coli OX=562 GN=DM962_29790 PE=3 SV=1	FALSE	13.563	14	4	6	4	377	41.5	8.81	6.91	4	1
High	Master Protein	A0A1X3LKC0	Putative outer membrane protein OS=Escherichia coli TA054 OX=656433 GN=EAXG_01325 PE=4 SV=1	FALSE	13.55	33	4	5	4	193	20.9	9.54	4.75	4	1
High	Master Protein	A0A4Q0F7V7	LexA repressor OS=Escherichia coli OX=562 GN=lexA PE=3 SV=1	FALSE	13.547	25	4	5	4	202	22.4	7.06	7.42	4	1
High	Master Protein	A0A5F1ULM4	Coproporphyrinogen-III oxidase OS=Escherichia coli OX=562 GN=hemN PE=3 SV=1	FALSE	13.542	9	3	3	3	457	52.7	6.23	6.58	3	1
High	Master Protein	A0A3L4JPW7	Fructokinase OS=Escherichia coli OX=562 GN=D9E35_06785 PE=4 SV=1	FALSE	13.538	15	3	3	3	302	32.5	5.69	6.18	3	1
High	Master Protein	A0A7U9GAC3	HAD superfamily (Subfamily IIIB) phosphatase OS=Escherichia coli H299 OX=656393 GN=ECOG_02147 PE=4 SV=1	FALSE	13.434	19	4	9	4	237	26.1	7.43	9.77	4	1
High	Master Protein	A0A085PB91	Outer membrane lipoprotein carrier protein LolA OS=Escherichia coli OX=562 GN=CDC27_18550 PE=4 SV=1	FALSE	13.272	15	3	5	3	201	23.2	6.35	8.14	3	1
High	Master Protein	A0A1X3KA32	Catalase-peroxidase OS=Escherichia coli H605 OX=656410 GN=katG PE=3 SV=1	FALSE	13.268	6	3	3	3	739	81.3	5.35	8.55	3	1
High	Master Protein	A0A7Z1LAE0	2-hydroxyacid dehydrogenase OS=Escherichia coli OX=562 GN=CT144_14730 PE=4 SV=1	FALSE	13.107	13	4	5	4	329	36.5	5.44	6.84	4	1
High	Master Protein	A0A3T9KK04	50S ribosomal protein L27 OS=Escherichia coli OX=562 GN=rpmA PE=3 SV=1	FALSE	12.853	38	3	11	3	85	9.1	10.58	23.01	3	1
High	Master Protein	A0A1X3LU77	S4 RNA-binding domain-containing protein OS=Escherichia coli TA249 OX=656441 GN=EAZG_00333 PE=4 SV=1	FALSE	12.793	41	3	4	3	70	7.4	8.03	7.75	3	1
High	Master Protein	A0A6N8Q358	ADP-glyceromanno-heptose 6-epimerase (Fragment) OS=Escherichia coli OX=562 GN=rfaD PE=3 SV=1	FALSE	12.751	18	4	4	4	289	32.5	4.88	7.35	4	1
High	Master Protein	A0A5N9VXC4	Malate dehydrogenase (Fragment) OS=Escherichia coli OX=562 GN=EI041_30010 PE=4 SV=1	FALSE	12.743	43	3	7	1	49	5.4	4.89	7.44	3	1
High	Master Protein	lcl	[locus_tag=EDL933_4524] [db_xref=GO:0003735,GO:0005622,GO:0005840,GO:0006412] [protein=SSU ribosomal protein S14p (S29e), zinc-independent] [protein_id=AIG70672.1] [location=complement(4269218..4269523)] [gbkey=CDS]	FALSE	12.726	33	4	9	4	101	11.6	11.17	17.04	4	1
High	Master Protein	A0A3L5H8P0	DUF2525 domain-containing protein OS=Escherichia coli OX=562 GN=D9E49_18960 PE=4 SV=1	FALSE	12.65	44	2	4	2	75	8.6	4.7	9.16	2	1
High	Master Protein	A0A0F3WHB3	Siderophore enterobactin receptor FepA OS=Escherichia coli OX=562 GN=fepA PE=3 SV=1	FALSE	12.633	11	4	4	4	746	82	5.45	2.38	4	1
High	Master Protein	B7MMQ3	Glyceraldehyde-3-phosphate dehydrogenase OS=Escherichia coli O45:K1 (strain S88 / ExPEC) OX=585035 GN=gapC PE=3 SV=1	FALSE	12.602	9	3	6	2	333	35.8	6.65	12.45	3	1
High	Master Protein	A0A2A6Q9R2	Aerobic respiration control sensor protein OS=Escherichia coli OX=562 GN=arcB PE=4 SV=1	FALSE	12.539	2	2	3	2	778	87.9	5.1	5.81	2	1
High	Master Protein	A0A6M0PUJ0	Flagellin OS=Escherichia coli OX=562 GN=G4V03_08525 PE=3 SV=1	FALSE	12.418	3	1	9	1	441	45.4	4.96	6.88	1	1
High	Master Protein	V0XVM1	Colicin I receptor OS=Escherichia coli 908525 OX=1268995 GN=HMPREF1608_02291 PE=3 SV=1	FALSE	12.409	8	4	4	4	728	81.3	5.5	7.49	4	1
High	Master Protein	A0A0K9T8W5	23S rRNA accumulation protein YceD OS=Escherichia coli M114 OX=656416 GN=ERYG_03913 PE=3 SV=1	FALSE	12.397	18	3	6	3	173	19.3	4.55	10.56	3	1
High	Master Protein	A0A376TTX9	Sigma-E factor regulatory protein OS=Escherichia coli OX=562 GN=rseB PE=3 SV=1	FALSE	12.351	5	2	4	1	535	60.2	6.48	8.48	2	1
High	Master Protein	A0A1X3KU61	Modulator of Rho-dependent transcription termination (ROF) OS=Escherichia coli H605 OX=656410 GN=EATG_03483 PE=4 SV=1	FALSE	12.333	36	2	5	1	86	9.7	4.74	4.62	2	1
High	Master Protein	WP_001296623.1	MULTISPECIES: septal ring assembly protein ZapB [Enterobacteriaceae]	FALSE	12.321	65	4	6	1	81	9.6	4.67	10.74	4	1
High	Master Protein	Q8XEH1	Uncharacterized protein OS=Escherichia coli O157:H7 OX=83334 GN=yffB PE=3 SV=1	FALSE	12.306	26	2	2	2	118	13.6	7.28	6.23	2	1
High	Master Protein	A0A0B5HLE3	Cell division protein FtsZ OS=Escherichia coli OX=562 GN=ftsZ PE=3 SV=1	FALSE	12.265	16	3	3	3	383	40.3	4.78	6.03	3	1
High	Master Protein	sp	TRYP_PIG	TRUE	12.255	16	3	3	3	231	24.4	7.18	7.28	3	1
High	Master Protein	A0A6M0PU82	Sulfate ABC transporter substrate-binding protein OS=Escherichia coli OX=562 GN=G4V03_04595 PE=4 SV=1	FALSE	12.172	13	4	4	2	334	37.1	8.59	10.14	4	1
High	Master Protein	A0A3J9B2D4	Metal-binding protein ZinT OS=Escherichia coli OX=562 GN=zinT PE=4 SV=1	FALSE	12.153	24	4	4	4	223	25.5	6.46	8.22	4	1
High	Master Protein	lcl	[locus_tag=EDL933_4528] [db_xref=GO:0003735,GO:0005622,GO:0005840,GO:0006412] [protein=SSU ribosomal protein S17p (S11e)] [protein_id=AIG70676.1] [location=complement(4270953..4271207)] [gbkey=CDS]	FALSE	12.148	32	2	5	2	84	9.7	9.6	8.03	2	1
High	Master Protein	F4SWA5	Pyruvate formate-lyase-activating enzyme OS=Escherichia coli M605 OX=656417 GN=ECIG_00551 PE=3 SV=1	FALSE	12.112	21	4	5	4	255	29.3	6.65	4.83	4	1
High	Master Protein	A0A7I8ZWW9	Hypothetical protein OS=Escherichia coli OX=562 GN=ETECE36_03716 PE=4 SV=1	FALSE	12.078	48	3	5	3	69	7.8	9.38	13.38	3	1
High	Master Protein	V0W749	OriC-binding nucleoid-associated protein OS=Escherichia coli 908519 OX=1268991 GN=HMPREF1604_01258 PE=3 SV=1	FALSE	12.015	65	4	7	4	71	8.4	7.42	8.99	4	1
High	Master Protein	A0A5F1DQ32	Flavodoxin OS=Escherichia coli OX=562 GN=fldA PE=3 SV=1	FALSE	11.941	34	3	4	3	176	19.7	4.39	4.14	3	1
High	Master Protein	A0A0M1UIV7	RelE/ParE family plasmid stabilization system protein OS=Escherichia coli OX=562 GN=FY127_25130 PE=4 SV=1	FALSE	11.84	31	2	2	2	91	10.8	9.6	6.03	2	1
High	Master Protein	A0A3W4JLB1	DUF2543 family protein OS=Escherichia coli OX=562 GN=EF082_18070 PE=4 SV=1	FALSE	11.835	57	2	2	2	81	9.3	4.22	5.2	2	1
High	Master Protein	A0A3R1B487	Polyamine aminopropyltransferase OS=Escherichia coli OX=562 GN=speE PE=3 SV=1	FALSE	11.826	19	3	4	3	288	32.3	5.76	7.68	3	1
High	Master Protein	A0A5D8MQB4	Dimethyl sulfoxide reductase subunit A OS=Escherichia coli OX=562 GN=FKO60_10665 PE=3 SV=1	FALSE	11.824	6	4	5	3	808	89.5	8.13	8.13	4	1
High	Master Protein	A0A7U2W8B2	Bifunctional glutathionylspermidine amidase/synthase OS=Escherichia coli O84:H7 OX=2697517 GN=GUK18_10725 PE=4 SV=1	FALSE	11.668	9	4	4	4	619	70.4	5.17	8.7	4	1
High	Master Protein	A0A6C9BPJ2	Alpha-galactosidase OS=Escherichia coli OX=562 GN=melA PE=3 SV=1	FALSE	11.66	8	3	3	3	451	50.6	5.83	8.68	3	1
High	Master Protein	A0A0B1N352	Aldoketomutase (Fragment) OS=Escherichia coli OX=562 GN=PU06_10150 PE=3 SV=1	FALSE	11.54	34	4	5	4	134	14.6	4.74	4.42	4	1
High	Master Protein	A0A0H3MNH5	Alanine--tRNA ligase OS=Escherichia coli O7:K1 (strain IAI39 / ExPEC) OX=585057 GN=alaS PE=3 SV=1	FALSE	11.517	7	6	6	6	876	96	5.81	1.71	6	1
High	Master Protein	A0A193RQH9	Branched chain amino acid ABC transporter substrate-binding protein LivJ OS=Escherichia coli OX=562 GN=livJ PE=3 SV=1	FALSE	11.504	13	3	4	1	367	39	5.8	9.61	3	1
High	Master Protein	E9TD13	Glycerol dehydrogenase OS=Escherichia coli MS 117-3 OX=749539 GN=gldA PE=3 SV=1	FALSE	11.484	8	2	4	2	380	40	4.98	7.61	2	1
High	Master Protein	A0A192C9S1	Iron-binding protein IscA OS=Escherichia coli O25b:H4 OX=941280 GN=iscA PE=3 SV=1	FALSE	11.477	13	1	2	1	109	11.8	4.88	7.33	1	1
High	Master Protein	D7X262	Membrane-bound hydrogenase 1 large subunit OS=Escherichia coli MS 198-1 OX=749549 GN=hyaB PE=3 SV=1	FALSE	11.344	10	5	5	5	597	66.2	5.97	8.97	5	1
High	Master Protein	A0A3Q0P7K9	Uncharacterized protein OS=Escherichia coli OX=562 GN=AJ318_05800 PE=4 SV=1	FALSE	11.322	40	3	6	3	126	12.9	5.03	9.24	3	1
High	Master Protein	A0A1V3W179	Biotin carboxylase OS=Escherichia coli OX=562 GN=BMT91_11300 PE=4 SV=1	FALSE	11.295	5	2	4	2	449	49.3	7.11	4.48	2	1
High	Master Protein	A0A7M3ITV1	DNA-binding protein OS=Escherichia coli OX=562 GN=E5S44_17060 PE=4 SV=1	FALSE	11.282	18	3	4	3	227	25.2	6.95	6.03	3	1
High	Master Protein	G0F8B8	Copper homeostasis protein CutC OS=Escherichia coli UMNF18 OX=1050617 GN=cutC PE=3 SV=1	FALSE	11.246	13	2	2	2	248	26.6	5.95	5.78	2	1
High	Master Protein	A0A7U8TNZ2	Glycerol-3-phosphate dehydrogenase OS=Escherichia coli O157:H7 OX=83334 GN=glpD PE=4 SV=1	FALSE	11.192	8	3	5	3	501	56.8	7.68	5.24	3	1
High	Master Protein	A0A0H3EII8	GTP cyclohydrolase-2 OS=Escherichia coli O83:H1 (strain NRG 857C / AIEC) OX=685038 GN=ribA PE=3 SV=1	FALSE	11.132	20	2	3	1	196	21.8	5.95	6.78	2	1
High	Master Protein	A0A1X3K474	L-threonine 3-dehydrogenase OS=Escherichia coli H461 OX=656403 GN=tdh PE=3 SV=1	FALSE	11.076	12	3	3	3	341	37.3	6.38	7.13	3	1
High	Master Protein	A0A402ZCT3	DUF3251 domain-containing protein OS=Escherichia coli OX=562 GN=DL455_04320 PE=4 SV=1	FALSE	11.06	22	3	4	3	179	19.7	5.94	9.22	3	1
High	Master Protein	A0A454A7I4	Endonuclease I OS=Escherichia coli O6:K15:H31 (strain 536 / UPEC) OX=362663 GN=ECP_2939 PE=3 SV=1	FALSE	11.054	15	3	4	3	235	26.7	8.82	5.07	3	1
High	Master Protein	A0A1X3KQJ2	Protein TolA OS=Escherichia coli H605 OX=656410 GN=EATG_00511 PE=4 SV=1	FALSE	10.982	11	4	4	4	425	43.5	9.13	6.38	4	1
High	Master Protein	A0A3T4WKR8	Uncharacterized protein OS=Escherichia coli OX=562 GN=DT034_11240 PE=4 SV=1	FALSE	10.981	37	3	4	3	105	11.4	8.91	10.32	3	1
High	Master Protein	A0A1X3KJE0	Serine-type D-Ala-D-Ala carboxypeptidase OS=Escherichia coli H461 OX=656403 GN=EARG_04233 PE=3 SV=1	FALSE	10.979	8	3	4	3	407	44.5	8.03	8.68	3	1
High	Master Protein	lcl	[locus_tag=EDL933_3175] [protein=hypothetical protein] [protein_id=AIG69341.1] [location=2948936..2949112] [gbkey=CDS]	FALSE	10.925	38	2	3	1	58	6.5	4.64	5.17	2	1
High	Master Protein	B7MYA2	Putative fused malic enzyme oxidoreductase putative phosphotransacetylase OS=Escherichia coli O81 (strain ED1a) OX=585397 GN=maeB PE=3 SV=1	FALSE	10.914	6	3	3	3	759	82.3	5.55	5.48	3	1
High	Master Protein	A0A1L4J1G4	Quinol monooxygenase OS=Escherichia coli OX=562 GN=RG28_19985 PE=4 SV=1	FALSE	10.9	33	4	7	4	104	11.5	6.24	11.3	4	1
High	Master Protein	A0A2W6QND9	DrsE domain-containing protein (Fragment) OS=Escherichia coli OX=562 GN=DNQ45_30635 PE=4 SV=1	FALSE	10.899	54	2	2	2	54	5.9	8.73	7.45	2	1
High	Master Protein	lcl	[locus_tag=EDL933_2757] [protein=hypothetical protein] [protein_id=AIG68929.1] [location=complement(2573345..2573599)] [gbkey=CDS]	FALSE	10.876	48	3	3	3	84	8.9	7.03	7.72	3	1
High	Master Protein	A0A0E0TY52	Fimbrial protein FimG OS=Escherichia coli UMNK88 OX=696406 GN=UMNK88_1908 PE=4 SV=1	FALSE	10.851	15	2	5	2	167	18.2	5.96	8.74	2	1
High	Master Protein	D6I810	Pyruvate dehydrogenase [ubiquinone] OS=Escherichia coli B185 OX=550676 GN=poxB PE=3 SV=1	FALSE	10.729	8	4	5	4	572	61.9	6.28	8.52	4	1
High	Master Protein	A0A0K4WAB3	Asparagine--tRNA ligase OS=Escherichia coli OX=562 GN=asnS PE=3 SV=1	FALSE	10.641	5	2	3	2	466	52.5	5.31	8.81	2	1
High	Master Protein	lcl	[locus_tag=EDL933_1249] [protein=hypothetical protein] [protein_id=AIG67444.1] [location=complement(1255074..1255265)] [gbkey=CDS]	FALSE	10.616	41	1	1	1	63	7	4.35	4.88	1	1
High	Master Protein	A0A0K5V851	AMP nucleosidase OS=Escherichia coli OX=562 GN=ygdH PE=4 SV=1	FALSE	10.562	8	3	3	3	454	50.9	6.42	6.54	3	1
High	Master Protein	A0A6C8HDF8	Dihydropteroate synthase OS=Escherichia coli P0299917.1 OX=1116047 GN=ECP02999171_4053 PE=3 SV=1	FALSE	10.548	14	4	5	4	282	30.7	5.88	10.66	4	1
High	Master Protein	A0A423CSY4	Two-component system response regulator ArcA OS=Escherichia coli OX=562 GN=BFD68_03280 PE=4 SV=1	FALSE	10.547	19	3	4	3	238	27.3	5.33	8.53	3	1
High	Master Protein	A0A069XGT2	Agmatinase OS=Escherichia coli 3-373-03_S4_C2 OX=1444252 GN=speB PE=3 SV=1	FALSE	10.546	8	2	3	2	306	33.6	5.39	5.13	2	1
High	Master Protein	A0A0A0F8I5	Acylphosphatase OS=Escherichia coli G3/10 OX=1455601 GN=yccX PE=3 SV=1	FALSE	10.515	39	3	4	3	92	10.2	8	5.07	3	1
High	Master Protein	A0A4D1KFF6	Lipoprotein OS=Escherichia coli OX=562 GN=ygdI PE=4 SV=1	FALSE	10.462	27	1	3	1	75	8.2	5.97	2.99	1	1
High	Master Protein	A0A6M0PEQ6	50S ribosomal protein L2 OS=Escherichia coli OX=562 GN=rplB PE=3 SV=1	FALSE	10.443	18	5	5	5	273	29.8	10.93	7.96	5	1
High	Master Protein	V0XCK2	RNA polymerase sigma factor (Fragment) OS=Escherichia coli 908525 OX=1268995 GN=HMPREF1608_03538 PE=3 SV=1	FALSE	10.39	29	4	4	4	189	21.4	5.17	5.79	4	1
High	Master Protein	A0A1X3KA02	Deoxyuridine 5'-triphosphate nucleotidohydrolase OS=Escherichia coli H605 OX=656410 GN=dut PE=3 SV=1	FALSE	10.37	44	3	5	3	152	16.3	5.11	6.71	3	1
High	Master Protein	F4VJZ8	Nitrite reductase [NAD(P)H], small subunit OS=Escherichia coli H591 OX=656408 GN=ECPG_02678 PE=4 SV=1	FALSE	10.304	30	2	3	2	108	12.3	5.24	5.11	2	1
High	Master Protein	A0A2D0P326	Lysine--tRNA ligase OS=Escherichia coli O127:H6 OX=168807 GN=lysS PE=3 SV=1	FALSE	10.273	8	3	4	1	505	57.6	5.24	6.14	3	1
High	Master Protein	A0A4Q0BJJ8	Valine--tRNA ligase OS=Escherichia coli OX=562 GN=valS PE=3 SV=1	FALSE	10.242	4	3	3	3	951	108.1	5.36	7.31	3	1
High	Master Protein	A0A4T9JVH9	Type II toxin-antitoxin system antitoxin DinJ OS=Escherichia coli OX=562 GN=dinJ PE=3 SV=1	FALSE	10.237	24	2	3	2	86	9.4	6.06	2.78	2	1
High	Master Protein	V0Z9Z7	FCD domain protein OS=Escherichia coli 908573 OX=1268998 GN=HMPREF1611_00638 PE=4 SV=1	FALSE	10.215	14	2	2	2	230	26.1	6.15	6.16	2	1
High	Master Protein	A0A6S5M4R9	Der GTPase-activating protein YihI OS=Escherichia coli OX=562 GN=yihI PE=3 SV=1	FALSE	10.164	17	2	4	2	169	19.1	7.5	8.82	2	1
High	Master Protein	A0A1X3L2I9	Tautomerase PptA OS=Escherichia coli H420 OX=656400 GN=pptA PE=3 SV=1	FALSE	10.136	15	1	2	1	88	10	5.86	4.46	1	1
High	Master Protein	A0A1E5MEF0	NAD(P)H nitroreductase OS=Escherichia coli OX=562 GN=A9R57_22925 PE=3 SV=1	FALSE	10.12	14	3	3	3	217	23.9	6.23	8.38	3	1
High	Master Protein	A0A6M0PS24	Leucine-responsive transcriptional regulator Lrp OS=Escherichia coli OX=562 GN=lrp PE=4 SV=1	FALSE	10.071	15	3	5	3	164	18.9	8.78	9.03	3	1
High	Master Protein	A0A2S8JRZ4	High-affinity branched-chain amino acid ABC transporter substrate-binding protein LivK OS=Escherichia coli OX=562 GN=livk PE=3 SV=1	FALSE	10.062	9	3	4	1	369	39.4	5.81	8.64	3	1
High	Master Protein	E9XHG6	S-ribosylhomocysteine lyase OS=Escherichia coli TW10509 OX=656449 GN=luxS PE=3 SV=1	FALSE	10.022	25	3	4	3	171	19.4	5.36	7.16	3	1
High	Master Protein	A0A028E6T3	Probable cytosol aminopeptidase OS=Escherichia coli O118:H16 str. 2009C-4446 OX=1446549 GN=pepA PE=3 SV=1	FALSE	10.006	12	4	4	4	503	54.9	7.23	0	4	1
High	Master Protein	A0A6C9H4N3	XRE family transcriptional regulator OS=Escherichia coli OX=562 GN=GKG07_08105 PE=4 SV=1	FALSE	10.004	23	1	1	1	96	10.7	5.76	4.34	1	1
High	Master Protein	A0A2H9GBJ4	L-serine dehydratase OS=Escherichia coli OX=562 GN=sdaA PE=3 SV=1	FALSE	9.976	7	3	4	3	454	48.9	5.4	4.37	3	1
High	Master Protein	A0A1V3W2A9	ATP synthase epsilon chain OS=Escherichia coli OX=562 GN=atpC PE=3 SV=1	FALSE	9.933	22	2	3	2	139	15	5.72	5.6	2	1
High	Master Protein	A0A6C9G4Q4	F0F1 ATP synthase subunit beta (Fragment) OS=Escherichia coli OX=562 GN=GKG12_25850 PE=3 SV=1	FALSE	9.933	8	2	3	1	325	35.3	5.45	5.05	2	1
High	Master Protein	Q1RF12	N5-carboxyaminoimidazole ribonucleotide mutase OS=Escherichia coli (strain UTI89 / UPEC) OX=364106 GN=purE PE=3 SV=1	FALSE	9.827	17	2	2	2	178	18.8	7.12	6.04	2	1
High	Master Protein	A0A6C9EFL0	F0F1 ATP synthase subunit alpha (Fragment) OS=Escherichia coli OX=562 GN=GKG27_28215 PE=3 SV=1	FALSE	9.813	6	2	3	1	348	37.3	7.99	5.59	2	1
High	Master Protein	A0A7B5YRM7	DNA gyrase inhibitor OS=Escherichia coli OX=562 GN=sbmC PE=3 SV=1	FALSE	9.786	44	3	3	3	157	18.1	4.7	5.97	3	1
High	Master Protein	A0A0K3YW62	Hydrogenase-2 large subunit OS=Escherichia coli OX=562 GN=hybC PE=3 SV=1	FALSE	9.774	10	4	5	4	567	62.5	6.28	4.01	4	1
High	Master Protein	A0A4C9ZMU0	Shiga toxin 1 subunit B OS=Escherichia coli OX=562 GN=stx1B PE=4 SV=1	FALSE	9.774	29	2	4	2	89	9.8	7.97	9.73	2	1
High	Master Protein	A0A7Z1EWR4	Alpha/beta hydrolase OS=Escherichia coli OX=562 GN=APX88_11605 PE=4 SV=1	FALSE	9.773	4	1	3	1	378	41.5	7.64	10.54	1	1
High	Master Protein	W9AKW6	30S ribosomal protein S11 OS=Escherichia coli O25b:H4-ST131 OX=941322 GN=rpsK PE=3 SV=1	FALSE	9.763	22	2	4	2	129	13.9	11.33	6.94	2	1
High	Master Protein	A0A3L4XQN0	Galactose-1-phosphate uridylyltransferase OS=Escherichia coli OX=562 GN=galT PE=3 SV=1	FALSE	9.756	7	2	2	2	348	39.6	6.42	6.5	2	1
High	Master Protein	A0A6M0Q077	2-iminobutanoate/2-iminopropanoate deaminase OS=Escherichia coli OX=562 GN=ridA PE=3 SV=1	FALSE	9.715	34	2	8	1	128	13.7	5.21	15.03	2	1
High	Master Protein	A0A3T8R4B3	YtfJ family protein OS=Escherichia coli OX=562 GN=DND16_14120 PE=4 SV=1	FALSE	9.694	22	3	4	1	185	20.6	9.16	7.25	3	1
High	Master Protein	A0A0K4J9L8	Phosphofructokinase OS=Escherichia coli OX=562 GN=fruK PE=3 SV=1	FALSE	9.623	8	2	2	2	312	33.7	5.73	5.79	2	1
High	Master Protein	A0A1X3IM88	NADH-quinone oxidoreductase subunit F OS=Escherichia coli E1114 OX=550691 GN=EADG_01883 PE=3 SV=1	FALSE	9.495	10	3	5	3	445	49.3	6.86	8.79	3	1
High	Master Protein	A0A7X1T2H1	Rop family plasmid primer RNA-binding protein OS=Escherichia coli OX=562 GN=E4K51_27190 PE=4 SV=1	FALSE	9.454	63	2	2	2	48	5.5	4.13	2.68	2	1
High	Master Protein	A0A0K4HEV6	Putative cytoplasmic protein YciI OS=Escherichia coli OX=562 GN=yciI PE=3 SV=1	FALSE	9.424	19	2	3	2	98	10.6	5.12	5.26	2	1
High	Master Protein	A0A1X3KNQ1	Carbamoyl-phosphate synthase small chain OS=Escherichia coli H461 OX=656403 GN=carA PE=3 SV=1	FALSE	9.409	11	3	3	3	391	42.4	6.27	6.21	3	1
High	Master Protein	A0A193LQV2	Tryptophan synthase alpha chain OS=Escherichia coli OX=562 GN=trpA PE=3 SV=1	FALSE	9.326	7	1	1	1	268	28.7	5.48	3.33	1	1
High	Master Protein	sp	PPIA_HUMAN	TRUE	9.311	11	2	2	2	164	17.9	7.81	5.09	2	1
High	Master Protein	D6I6R3	Negative modulator of initiation of replication OS=Escherichia coli B185 OX=550676 GN=seqA PE=3 SV=1	FALSE	9.304	8	1	1	1	226	25.3	8.92	4.02	1	1
High	Master Protein	D3GTJ9	Mannose-6-phosphate isomerase OS=Escherichia coli O44:H18 (strain 042 / EAEC) OX=216592 GN=manA PE=3 SV=1	FALSE	9.268	9	3	3	3	391	42.8	5.57	6.54	3	1
High	Master Protein	A6MTV2	Shiga toxin 2 B subunit OS=Escherichia coli OX=562 PE=4 SV=1	FALSE	9.265	34	2	2	2	89	9.9	6	5.18	2	1
High	Master Protein	B7USS5	Uncharacterized protein OS=Escherichia coli O127:H6 (strain E2348/69 / EPEC) OX=574521 GN=yecJ PE=4 SV=1	FALSE	9.253	28	2	2	2	83	9.2	5.33	5.46	2	1
High	Master Protein	A0A6C9QAF4	50S ribosomal protein L30 OS=Escherichia coli OX=562 GN=rpmD PE=3 SV=1	FALSE	9.228	58	3	5	3	59	6.6	11.33	6.95	3	1
High	Master Protein	B7URS5	Uncharacterized protein OS=Escherichia coli O127:H6 (strain E2348/69 / EPEC) OX=574521 GN=ynfD PE=4 SV=1	FALSE	9.197	38	1	4	1	101	10.6	5.26	7.14	1	1
High	Master Protein	A0A1M2J4G4	Cytochrome c nitrite reductase pentaheme subunit OS=Escherichia coli OX=562 GN=nrfB PE=4 SV=1	FALSE	9.193	19	3	4	3	188	20.6	7.87	2.16	3	1
High	Master Protein	A0A5E9S3J8	Thymidylate kinase OS=Escherichia coli OX=562 GN=tmk PE=3 SV=1	FALSE	9.164	16	3	3	3	213	23.8	5.52	4.06	3	1
High	Master Protein	D6IE08	Oxidoreductase YgjR OS=Escherichia coli B185 OX=550676 GN=ECDG_03281 PE=4 SV=1	FALSE	9.149	10	2	2	2	334	37	6.27	6.78	2	1
High	Master Protein	A0A4Q0BWU5	Ribosomal RNA large subunit methyltransferase I OS=Escherichia coli OX=562 GN=rlmI PE=3 SV=1	FALSE	9.145	13	4	6	4	396	44.4	7.77	10.34	4	1
High	Master Protein	A0A4T5UPV9	Fe-S cluster assembly scaffold SufA OS=Escherichia coli OX=562 GN=sufA PE=3 SV=1	FALSE	9.103	23	2	2	2	122	13.3	4.87	3.76	2	1
High	Master Protein	D3H492	Pyruvate dehydrogenase E1 component OS=Escherichia coli O44:H18 (strain 042 / EAEC) OX=216592 GN=aceE PE=4 SV=1	FALSE	8.975	5	5	8	5	887	99.6	5.68	11.55	5	1
High	Master Protein	A0A3J1YTW2	Acetyltransferase (Fragment) OS=Escherichia coli OX=562 GN=EEA45_25045 PE=4 SV=1	FALSE	8.951	12	2	2	2	212	22.7	8.31	5.22	2	1
High	Master Protein	lcl	[locus_tag=EDL933_1670] [db_xref=GO:0004316] [protein=3-oxoacyl-[acyl-carrier protein] reductase] [protein_id=AIG67858.1] [location=1597500..1598234] [gbkey=CDS]	FALSE	8.932	19	3	4	3	244	25.6	7.42	2.9	3	1
High	Master Protein	A0A0F3UYM5	ABC transporter substrate-binding protein OS=Escherichia coli OX=562 GN=ytfQ PE=4 SV=1	FALSE	8.922	12	4	5	4	318	34.3	7.14	8.68	4	1
High	Master Protein	C3SYK8	UPF0125 protein ECs3480 OS=Escherichia coli OX=562 GN=ECs3480 PE=3 SV=1	FALSE	8.899	33	3	3	3	102	11.6	9.64	4.19	3	1
High	Master Protein	A0A6D0USM6	Glycerophosphodiester phosphodiesterase (Fragment) OS=Escherichia coli OX=562 GN=glpQ PE=4 SV=1	FALSE	8.835	4	1	2	1	257	29.5	5.33	6.75	1	1
High	Master Protein	A0A646JAG4	Protein-methionine-sulfoxide reductase catalytic subunit MsrP OS=Escherichia coli OX=562 GN=msrP PE=3 SV=1	FALSE	8.815	9	2	2	2	334	37.4	9.03	5.23	2	1
High	Master Protein	A0A6M0PSX7	GTP cyclohydrolase-2 OS=Escherichia coli OX=562 GN=ribA PE=3 SV=1	FALSE	8.756	12	2	3	1	195	21.6	6.21	9.13	2	1
High	Master Protein	C3T6P7	Uncharacterized protein OS=Escherichia coli OX=562 GN=ECs2501 PE=4 SV=1	FALSE	8.748	30	3	3	3	122	14.1	8.13	8.67	3	1
High	Master Protein	A0A3L1GG86	3',5'-cyclic adenosine monophosphate phosphodiesterase CpdA OS=Escherichia coli OX=562 GN=cpdA PE=3 SV=1	FALSE	8.746	13	3	3	3	275	30.9	5.95	5.03	3	1
High	Master Protein	sp	HBB_HUMAN	TRUE	8.658	13	2	5	2	146	15.9	7.28	14.13	2	1
High	Master Protein	W8ZQJ8	Probable phosphatase YcdX OS=Escherichia coli O25b:H4-ST131 OX=941322 GN=ycdX PE=3 SV=1	FALSE	8.635	22	4	4	4	245	26.8	5.95	4.28	4	1
High	Master Protein	Q1R4Y1	Rhodanese domain-containing protein OS=Escherichia coli (strain UTI89 / UPEC) OX=364106 GN=yibN PE=4 SV=1	FALSE	8.553	16	2	2	2	147	16	9.33	5.3	2	1
High	Master Protein	D3QSU7	Uncharacterized protein OS=Escherichia coli O55:H7 (strain CB9615 / EPEC) OX=701177 GN=yhcB PE=4 SV=1	FALSE	8.503	25	2	2	2	134	15.2	5.54	4.98	2	1
High	Master Protein	A0A6M0PY67	30S ribosomal protein S3 OS=Escherichia coli OX=562 GN=rpsC PE=3 SV=1	FALSE	8.479	13	2	2	2	233	26	10.32	3.97	2	1
High	Master Protein	A0A1Q4PGW7	C-type lysozyme inhibitor OS=Escherichia coli OX=562 GN=BMT49_10755 PE=4 SV=1	FALSE	8.348	22	2	2	2	109	12.6	8.16	4.15	2	1
High	Master Protein	A0A070UZH5	Ribonuclease PH OS=Escherichia coli 2-177-06_S3_C2 OX=1444151 GN=rph PE=3 SV=1	FALSE	8.3	16	3	3	3	238	25.3	5.71	4.52	3	1
High	Master Protein	A0A070FDI6	Endoribonuclease L-PSP OS=Escherichia coli O128:H2 str. 2011C-3317 OX=1446581 GN=BU64_15790 PE=3 SV=1	FALSE	8.233	17	2	7	1	129	14	5.21	15.03	2	1
High	Master Protein	A0A7H9QTA2	Acetyltransferase component of pyruvate dehydrogenase complex OS=Escherichia coli OX=562 GN=aceF PE=3 SV=1	FALSE	8.192	3	1	1	1	630	66	5.2	4.41	1	1
High	Master Protein	A0A369FHU9	UPF0235 protein YggU OS=Escherichia coli OX=562 GN=yggU PE=3 SV=1	FALSE	8.15	15	1	1	1	96	10.4	9.47	3.33	1	1
High	Master Protein	A0A7U8MSN6	Uncharacterized protein OS=Escherichia coli O157:H7 OX=83334 GN=CQJ22_004083 PE=4 SV=1	FALSE	8.14	20	1	1	1	93	10.2	6.96	3.67	1	1
High	Master Protein	A0A0L6ZFJ6	Aspartate carbamoyltransferase regulatory chain OS=Escherichia coli OX=562 GN=pyrI PE=3 SV=1	FALSE	8.036	15	2	2	2	153	17	8.18	5.86	2	1
High	Master Protein	A0A376FSI6	Toxin-antitoxin biofilm protein OS=Escherichia coli OX=562 GN=tabA PE=4 SV=1	FALSE	8.022	20	2	3	2	150	16.9	5.76	2.74	2	1
High	Master Protein	B1B6T3	Nucleoside diphosphate kinase (Fragment) OS=Escherichia coli OX=562 GN=ndk PE=3 SV=1	FALSE	7.972	30	2	2	2	134	14.3	5.24	2.24	2	1
High	Master Protein	A0A080G1G0	Glutaredoxin, GrxA family OS=Escherichia coli 1-392-07_S4_C3 OX=1444275 GN=grxA PE=4 SV=1	FALSE	7.888	47	2	2	2	85	9.7	5.45	3.03	2	1
High	Master Protein	A0A2S1YB30	Elongation factor P OS=Escherichia coli OX=562 GN=efp PE=3 SV=1	FALSE	7.887	6	1	3	1	188	20.6	5.02	5.04	1	1
High	Master Protein	E9XQY6	Trp operon repressor OS=Escherichia coli TW10509 OX=656449 GN=trpR PE=3 SV=1	FALSE	7.879	15	2	3	2	108	12.4	5.85	5.3	2	1
High	Master Protein	A0A403TWL4	Membrane protein insertase YidC OS=Escherichia coli OX=562 GN=yidC PE=3 SV=1	FALSE	7.871	6	3	3	3	548	61.5	7.99	2.67	3	1
High	Master Protein	A0A3W5XUZ2	Signal peptidase I OS=Escherichia coli OX=562 GN=EAN77_05305 PE=3 SV=1	FALSE	7.824	9	4	4	4	324	35.9	7.33	5.01	4	1
High	Master Protein	A7ZH72	Post-segregation antitoxin CcdA OS=Escherichia coli O139:H28 (strain E24377A / ETEC) OX=331111 GN=ccdA1 PE=4 SV=1	FALSE	7.739	23	1	1	1	82	9.6	7.97	3.66	1	1
High	Master Protein	A0A6G8BCM4	UPF0033 domain-containing protein OS=Escherichia coli OX=562 GN=F0L67_05115 PE=3 SV=1	FALSE	7.702	23	1	1	1	75	8.1	4.28	3.85	1	1
High	Master Protein	A0A5P0J4W5	Electron transport protein HydN OS=Escherichia coli OX=562 GN=hydN PE=4 SV=1	FALSE	7.604	15	3	3	3	175	19	8.13	6.22	3	1
High	Master Protein	A0A377JYW8	50S ribosomal protein L4 OS=Escherichia coli OX=562 GN=rplD_1 PE=3 SV=1	FALSE	7.582	40	4	4	1	96	10.2	11.27	6.03	4	1
High	Master Protein	A0A3A6RSU6	50S ribosomal protein L22 (Fragment) OS=Escherichia coli OX=562 GN=rplV PE=3 SV=1	FALSE	7.489	38	2	4	1	52	5.8	9.41	6.76	2	1
High	Master Protein	O07849	DegT/DnrJ/EryC1/StrS aminotransferase family protein OS=Escherichia coli OX=562 GN=per PE=3 SV=2	FALSE	7.487	7	2	2	2	366	41.8	6.4	6.45	2	1
High	Master Protein	A0A1I9XBK3	Chaperone lipoprotein OS=Escherichia coli OX=562 GN=AU473_28455 PE=4 SV=1	FALSE	7.467	26	3	3	3	132	14.9	9.28	4.02	3	1
High	Master Protein	A0A4C9DJ96	Periplasmic-iron-binding protein OS=Escherichia coli OX=562 GN=BvCmsKKP036_04308 PE=4 SV=1	FALSE	7.436	7	2	2	2	343	37.4	8.03	6.28	2	1
High	Master Protein	A0A1X3LHH8	3-phosphoshikimate 1-carboxyvinyltransferase OS=Escherichia coli TA054 OX=656433 GN=aroA PE=3 SV=1	FALSE	7.422	6	2	2	2	427	46.1	5.59	3.48	2	1
High	Master Protein	A0A4T5FZY6	Uncharacterized protein OS=Escherichia coli OX=562 GN=BvCmsNSP006_00291 PE=4 SV=1	FALSE	7.416	15	1	1	1	74	8.6	5.16	3.4	1	1
High	Master Protein	A0A5P0ZDM8	F0F1 ATP synthase subunit beta (Fragment) OS=Escherichia coli OX=562 GN=atpD PE=3 SV=1	FALSE	7.412	15	2	2	1	237	26.3	4.94	5.26	2	1
High	Master Protein	A0A0K3KXM0	Phosphoribosylaminoimidazole-succinocarboxamide synthase OS=Escherichia coli OX=562 GN=purC PE=3 SV=1	FALSE	7.36	11	2	3	2	237	27	5.16	2.23	2	1
High	Master Protein	A0A4T8WWM6	Beta-ketoacyl-ACP synthase I OS=Escherichia coli OX=562 GN=EXM29_04365 PE=3 SV=1	FALSE	7.343	6	2	2	2	406	42.6	5.44	4.51	2	1
High	Master Protein	A0A3L5H676	Histidine--tRNA ligase OS=Escherichia coli OX=562 GN=hisS PE=3 SV=1	FALSE	7.232	8	2	2	2	424	47	5.91	2.78	2	1
High	Master Protein	A0A7H5DAF2	Formate dehydrogenase subunit alpha OS=Escherichia coli OX=562 GN=EBP16_11225 PE=3 SV=1	FALSE	7.15	6	4	4	4	715	79.3	6.32	4.32	4	1
High	Master Protein	D8ACN9	UTP--glucose-1-phosphate uridylyltransferase OS=Escherichia coli (strain MS 21-1) OX=749527 GN=galU PE=3 SV=1	FALSE	7.143	10	3	4	3	302	32.9	5.24	3.73	3	1
High	Master Protein	A0A271RCC2	Cytidylate kinase OS=Escherichia coli OX=562 GN=cmk PE=3 SV=1	FALSE	7.084	24	3	3	3	227	24.7	5.67	4.8	3	1
High	Master Protein	A0A0T5XN63	50S ribosomal protein L33 OS=Escherichia coli OX=562 GN=rpmG PE=3 SV=1	FALSE	7.067	38	2	5	2	55	6.4	10.24	11.49	2	1
High	Master Protein	A0A2I6EYK6	Chaperone protein YcdY OS=Escherichia coli OX=562 GN=ycdY PE=4 SV=1	FALSE	7.036	16	2	2	2	184	20.7	4.27	3.71	2	1
High	Master Protein	A0A5F1DZR0	DUF1480 domain-containing protein OS=Escherichia coli OX=562 GN=CQB02_07115 PE=4 SV=1	FALSE	7.017	24	1	3	1	78	8.7	4.81	5.26	1	1
High	Master Protein	D6JFK3	3-deoxy-D-manno-octulosonate 8-phosphate phosphatase KdsC OS=Escherichia coli B354 OX=550677 GN=ECEG_02585 PE=3 SV=1	FALSE	6.996	15	2	4	2	188	19.9	5.24	10.01	2	1
High	Master Protein	A0A0K4UZH8	Tol-Pal system protein TolR OS=Escherichia coli OX=562 GN=tolR PE=3 SV=1	FALSE	6.989	14	2	4	2	142	15.4	5.53	6.95	2	1
High	Master Protein	A0A3X9FEJ8	Bis(5'-nucleosyl)-tetraphosphatase, symmetrical OS=Escherichia coli OX=562 GN=apaH PE=3 SV=1	FALSE	6.897	10	2	2	1	282	31.5	5.53	4.42	2	1
High	Master Protein	A0A7U8MRV4	Arc family DNA-binding protein OS=Escherichia coli O157:H7 OX=83334 GN=CQJ22_005128 PE=4 SV=1	FALSE	6.859	26	2	2	2	84	9.5	9.07	2.59	2	1
High	Master Protein	sp	GSTA1_HUMAN	TRUE	6.819	4	1	2	1	221	25.5	8.88	5.92	1	1
High	Master Protein	A0A0K4CKG6	Formyltetrahydrofolate deformylase OS=Escherichia coli OX=562 GN=purU PE=3 SV=1	FALSE	6.783	9	2	4	2	280	31.9	7.18	1.84	2	1
High	Master Protein	lcl	[locus_tag=EDL933_0514] [protein=Putative exported protein] [protein_id=AIG66718.1] [location=529989..530360] [gbkey=CDS]	FALSE	6.721	18	2	2	2	123	12.7	8.69	3.18	2	1
High	Master Protein	F4TLK5	Toxin-antitoxin system, antitoxin component, ribbon-helix-helix fold protein OS=Escherichia coli M718 OX=656419 GN=ECJG_03108 PE=4 SV=1	FALSE	6.658	27	2	3	2	88	9.9	9.32	2.13	2	1
High	Master Protein	A0A3E1WCL1	Lipopolysaccharide core heptose(II)-phosphate phosphatase OS=Escherichia coli OX=562 GN=ais PE=3 SV=1	FALSE	6.583	11	2	3	2	200	22.3	9.14	8.14	2	1
High	Master Protein	A0A7H9KSL0	NADH-quinone oxidoreductase subunit B OS=Escherichia coli OX=562 GN=nuoB PE=3 SV=1	FALSE	6.546	13	2	2	2	220	25.1	6.21	2.62	2	1
High	Master Protein	A0A3U2F8C8	DksA/TraR family C4-type zinc finger protein OS=Escherichia coli OX=562 GN=D8Y65_13065 PE=4 SV=1	FALSE	6.539	20	1	1	1	88	9.8	5.17	3.95	1	1
High	Master Protein	A0A6M7H5U6	Transcription termination/antitermination protein NusG OS=Escherichia coli O157:H7 OX=83334 GN=nusG PE=3 SV=1	FALSE	6.525	18	2	3	2	181	20.5	6.81	5.83	2	1
High	Master Protein	A0A0L7AKX7	Mannonate dehydratase OS=Escherichia coli OX=562 GN=uxuA PE=3 SV=1	FALSE	6.485	9	2	2	2	394	44.8	5.62	2.57	2	1
High	Master Protein	A0A330C3M0	Cell division protein FtsN OS=Escherichia coli OX=562 GN=ftsN PE=3 SV=1	FALSE	6.467	12	3	3	3	319	35.9	10.13	1.73	3	1
High	Master Protein	V0ZCP1	Recombination-associated protein RdgC OS=Escherichia coli 908573 OX=1268998 GN=rdgC PE=3 SV=1	FALSE	6.458	8	2	2	2	316	35.4	5.41	2.55	2	1
High	Master Protein	A0A4S1NIF8	dITP/XTP pyrophosphatase OS=Escherichia coli OX=562 GN=rdgB PE=3 SV=1	FALSE	6.457	19	2	2	2	197	21	5.59	4.52	2	1
High	Master Protein	A0A2I5SLT5	Curved DNA-binding protein OS=Escherichia coli OX=562 GN=cbpA PE=3 SV=1	FALSE	6.442	14	2	2	2	306	34.5	6.81	5.07	2	1
High	Master Protein	A0A0J2BD99	Cell division protein DedD OS=Escherichia coli OX=562 GN=dedD PE=3 SV=1	FALSE	6.422	9	2	4	2	216	22.5	8.22	6.38	2	1
High	Master Protein	A0A0K4S7A1	Peptidyl-prolyl cis-trans isomerase OS=Escherichia coli OX=562 GN=fklB PE=3 SV=1	FALSE	6.41	16	3	3	3	206	22.2	4.89	6.36	3	1
High	Master Protein	A0A070SV39	Ribosomal subunit interface protein OS=Escherichia coli 2-210-07_S3_C3 OX=1444180 GN=AC45_0301 PE=4 SV=1	FALSE	6.379	9	1	2	1	95	10.8	7.06	5.07	1	1
High	Master Protein	A0A5C9AJ78	30S ribosomal protein S21 (Fragment) OS=Escherichia coli OX=562 GN=rpsU PE=1 SV=1	FALSE	6.358	29	2	7	2	62	7.3	10.98	10.37	2	1
High	Master Protein	A0A5P0JBA0	ATP synthase subunit b OS=Escherichia coli OX=562 GN=atpF PE=3 SV=1	FALSE	6.351	13	2	3	2	156	17.3	6.24	5.5	2	1
High	Master Protein	A0A6G6L4R6	Cytosine/isoguanine deaminase OS=Escherichia coli OX=562 GN=codA PE=4 SV=1	FALSE	6.314	4	1	1	1	427	47.6	6.09	2.26	1	1
High	Master Protein	B7USA9	Predicted hydrolase OS=Escherichia coli O127:H6 (strain E2348/69 / EPEC) OX=574521 GN=yniC PE=4 SV=1	FALSE	6.239	5	1	2	1	222	24.3	5.11	2.63	1	1
High	Master Protein	A0A7U5MTB3	Glutamate-5-semialdehyde dehydrogenase OS=Escherichia coli OX=562 GN=proA PE=4 SV=1	FALSE	6.23	7	2	2	2	391	41.8	5.4	3.12	2	1
High	Master Protein	A0A029INY8	Protein IscX OS=Escherichia coli 2-005-03_S4_C2 OX=1444228 GN=iscX PE=3 SV=1	FALSE	6.216	24	1	1	1	66	7.7	4.16	3.31	1	1
High	Master Protein	D7Y6X3	Peptidoglycan D,D-transpeptidase FtsI OS=Escherichia coli (strain MS 115-1) OX=749537 GN=ftsI PE=3 SV=1	FALSE	6.093	2	1	2	1	588	63.9	9.64	3.07	1	1
High	Master Protein	B7ND36	Ubiquinone biosynthesis accessory factor UbiK OS=Escherichia coli O17:K52:H18 (strain UMN026 / ExPEC) OX=585056 GN=yqiC PE=3 SV=1	FALSE	6.091	21	2	2	2	119	13.9	6.16	2.3	2	1
High	Master Protein	A0A073UME2	Protein FdhE OS=Escherichia coli 5-366-08_S1_C1 OX=1444047 GN=fdhE PE=3 SV=1	FALSE	6.08	5	1	1	1	309	34.7	5.26	2.99	1	1
High	Master Protein	A0A0K9TAB8	50S ribosomal protein L31 type B OS=Escherichia coli M114 OX=656416 GN=rpmE2 PE=3 SV=1	FALSE	6.06	24	2	3	2	88	10	9.31	4.43	2	1
High	Master Protein	F4SL23	Aspartyl-tRNA synthetase (Aspartate--tRNA ligase)(AspRS) OS=Escherichia coli H736 OX=656414 GN=ECHG_01744 PE=3 SV=1	FALSE	6.057	29	3	3	1	200	21.5	4.94	3.96	3	1
High	Master Protein	K4VL68	Acetyl-coenzyme A carboxylase carboxyl transferase subunit beta OS=Escherichia coli O111:H8 str. CVM9634 OX=1165944 GN=accD PE=3 SV=1	FALSE	6.043	6	2	5	2	304	33.2	7.99	4.19	2	1
High	Master Protein	A0A1M0CMM8	DUF1454 family protein OS=Escherichia coli OX=562 GN=BEN53_24305 PE=4 SV=1	FALSE	6.036	11	2	2	2	199	21.8	9.19	2.68	2	1
High	Master Protein	A0A1J1DNT3	Histidine biosynthesis bifunctional protein HisIE OS=Escherichia coli OX=562 GN=hisI PE=3 SV=1	FALSE	6.03	17	1	1	1	203	22.8	5.41	2.64	1	1
High	Master Protein	A0A2D0NNV1	Outer membrane lipoprotein OS=Escherichia coli O127:H6 OX=168807 GN=gfcB PE=4 SV=1	FALSE	6.014	16	2	2	2	192	21.8	5.35	3.38	2	1
High	Master Protein	A0A3K2YEL7	2-oxoglutarate reductase OS=Escherichia coli OX=562 GN=serA PE=3 SV=1	FALSE	6.013	8	3	3	3	410	44.2	6.35	2.37	3	1
High	Master Protein	A0A1X3KET9	Putative cytoplasmic protein OS=Escherichia coli H605 OX=656410 GN=EATG_03568 PE=4 SV=1	FALSE	6.007	34	2	2	2	68	7.9	7.83	0	2	1
High	Master Protein	A0A3X9LR29	Rho-binding antiterminator OS=Escherichia coli OX=562 GN=rof PE=4 SV=1	FALSE	5.974	36	2	3	1	86	9.7	4.74	0	2	1
High	Master Protein	D7ZHI9	Dihydroneopterin aldolase OS=Escherichia coli MS 69-1 OX=749531 GN=folB PE=4 SV=1	FALSE	5.931	28	3	3	3	120	14.1	7.64	4.24	3	1
High	Master Protein	A0A792STI6	Flagellar L-ring protein OS=Escherichia coli OX=562 GN=flgH PE=3 SV=1	FALSE	5.905	9	2	2	2	232	24.6	8.15	4.58	2	1
High	Master Protein	A0A073H7V9	Cysteine desulfurase, catalytic subunit CsdA OS=Escherichia coli 5-366-08_S1_C3 OX=1444102 GN=csdA PE=3 SV=1	FALSE	5.865	6	2	2	2	401	43.3	5.66	3.13	2	1
High	Master Protein	sp	CATA_HUMAN	TRUE	5.843	6	3	4	3	526	59.6	7.39	4.23	3	1
High	Master Protein	A0A026V5E3	Transcription antitermination protein NusB OS=Escherichia coli O174:H8 str. 04-3038 OX=1446704 GN=nusB PE=3 SV=1	FALSE	5.836	21	3	3	3	139	15.6	8.07	4.07	3	1
High	Master Protein	W8ZPC5	Cold shock-like protein CspD OS=Escherichia coli O25b:H4-ST131 OX=941322 GN=cspD PE=4 SV=1	FALSE	5.773	17	1	1	1	84	9.1	6.76	2.38	1	1
High	Master Protein	E9XPR9	Pyrroline-5-carboxylate reductase OS=Escherichia coli TW10509 OX=656449 GN=proC PE=3 SV=1	FALSE	5.752	9	2	2	2	269	28.1	5.63	2.4	2	1
High	Master Protein	A0A0A0F6X1	Uroporphyrinogen decarboxylase OS=Escherichia coli G3/10 OX=1455601 GN=hemE PE=3 SV=1	FALSE	5.718	9	2	2	2	354	39.2	6.3	2.18	2	1
High	Master Protein	A0A4D1PUV6	Cysteine--tRNA ligase OS=Escherichia coli OX=562 GN=cysS PE=3 SV=1	FALSE	5.717	5	2	2	2	461	52.2	5.57	3.93	2	1
High	Master Protein	A0A0D8WM50	ATP-dependent protease subunit HslV OS=Escherichia coli OX=562 GN=hslV PE=2 SV=1	FALSE	5.7	6	1	2	1	176	19.1	6.39	2.77	1	1
High	Master Protein	A0A1Q4P9Z9	Gamma carbonic anhydrase family protein OS=Escherichia coli OX=562 GN=BMT49_25175 PE=4 SV=1	FALSE	5.651	11	1	1	1	184	20.2	5.81	3.57	1	1
High	Master Protein	A0A3H8WD59	YceK/YidQ family lipoprotein OS=Escherichia coli OX=562 GN=C9E63_00290 PE=4 SV=1	FALSE	5.602	15	1	2	1	110	11.8	5.86	4.38	1	1
High	Master Protein	A0A7U9FT75	GMP reductase OS=Escherichia coli TA206 OX=656440 GN=ECKG_03650 PE=4 SV=1	FALSE	5.571	4	1	1	1	347	37.4	6.54	2.4	1	1
High	Master Protein	J7R784	Uncharacterized protein (Fragment) OS=Escherichia coli OX=562 GN=BN17_17961 PE=4 SV=1	FALSE	5.565	17	1	2	1	84	9.3	6.83	5.18	1	1
High	Master Protein	A0A073H561	Efflux pump membrane transporter OS=Escherichia coli 5-366-08_S1_C3 OX=1444102 GN=mdtF PE=3 SV=1	FALSE	5.552	1	1	2	1	1037	111.5	5.47	4.03	1	1
High	Master Protein	A0A2S8JQX7	D-cysteine desulfhydrase OS=Escherichia coli OX=562 GN=yedO PE=3 SV=1	FALSE	5.539	7	2	2	2	328	35.1	5.11	0	2	1
High	Master Protein	A0A163FZ32	DUF1496 domain-containing protein OS=Escherichia coli OX=562 GN=ynjH PE=4 SV=1	FALSE	5.535	21	2	3	2	90	9.9	7.05	2.62	2	1
High	Master Protein	A0A0E0XUT3	Isopentenyl-diphosphate Delta-isomerase OS=Escherichia coli O104:H4 (strain 2011C-3493) OX=1133852 GN=idi PE=3 SV=1	FALSE	5.517	22	2	2	2	182	20.4	5.74	4.71	2	1
High	Master Protein	A0A5F1DLR4	Protein SlyX OS=Escherichia coli OX=562 GN=slyX PE=3 SV=1	FALSE	5.5	26	1	4	1	72	8.2	4.92	6.58	1	1
High	Master Protein	A0A3S6ZI84	Co-chaperone protein HscB OS=Escherichia coli OX=562 GN=hscB PE=3 SV=1	FALSE	5.417	12	1	1	1	171	20.1	5.19	2.2	1	1
High	Master Protein	A0A403FXC0	Mannitol-1-phosphate 5-dehydrogenase OS=Escherichia coli OX=562 GN=mtlD PE=3 SV=1	FALSE	5.415	7	1	1	1	382	41.2	5.49	2.7	1	1
High	Master Protein	A0A4Y8AEX1	Probable transcriptional regulatory protein YebC OS=Escherichia coli OX=562 GN=yebC PE=3 SV=1	FALSE	5.414	8	2	4	2	246	26.5	4.93	9.68	2	1
High	Master Protein	A0A7Z6MHT5	Translation initiation factor IF-2 OS=Escherichia coli OX=562 GN=DTM25_06730 PE=4 SV=1	FALSE	5.386	2	2	2	2	890	97.4	6.14	3.61	2	1
High	Master Protein	A0A3A6T2M7	DUF2526 domain-containing protein OS=Escherichia coli OX=562 GN=D3821_04090 PE=4 SV=1	FALSE	5.381	13	1	2	1	77	8.7	5.67	5.15	1	1
High	Master Protein	F4T7Y8	Putative lipoprotein OS=Escherichia coli M605 OX=656417 GN=ECIG_03124 PE=4 SV=1	FALSE	5.368	17	2	2	2	109	12.1	9.48	1.89	2	1
High	Master Protein	A0A5F1DQJ4	UPF0250 protein YbeD OS=Escherichia coli OX=562 GN=ybeD PE=3 SV=1	FALSE	5.357	22	1	2	1	87	9.8	5.76	5.29	1	1
High	Master Protein	A0A1X3KAB6	Beta sliding clamp OS=Escherichia coli H605 OX=656410 GN=EATG_04058 PE=3 SV=1	FALSE	5.335	4	1	1	1	366	40.6	5.39	2.01	1	1
High	Master Protein	A0A377CNR0	Outer membrane lipoprotein Blc OS=Escherichia coli OX=562 GN=blc PE=3 SV=1	FALSE	5.289	6	1	2	1	177	19.9	8.76	4.28	1	1
High	Master Protein	A0A3E1WDG7	Cytotoxic protein CcdB OS=Escherichia coli OX=562 GN=ccdB PE=3 SV=1	FALSE	5.263	29	2	3	2	99	11.4	6.55	2.95	2	1
High	Master Protein	K4VI10	Autoinducer 2-binding protein LsrB OS=Escherichia coli O111:H8 str. CVM9634 OX=1165944 GN=ECO9634_11440 PE=3 SV=1	FALSE	5.26	5	1	1	1	302	32.7	5.4	3.11	1	1
High	Master Protein	A0A209N9B1	Dihydrolipoyllysine-residue succinyltransferase component of 2-oxoglutarate dehydrogenase complex OS=Escherichia coli OX=562 GN=A6581_21560 PE=3 SV=1	FALSE	5.247	4	1	1	1	405	44	5.81	3.13	1	1
High	Master Protein	A0A1M0M596	DUF3820 family protein OS=Escherichia coli OX=562 GN=ypeB PE=4 SV=1	FALSE	5.194	21	1	1	1	72	8.4	8.47	3.33	1	1
High	Master Protein	A0A1X3JG26	50S ribosomal protein L35 OS=Escherichia coli H386 OX=656397 GN=rpmI PE=3 SV=1	FALSE	5.169	19	1	2	1	70	7.9	11.52	2.99	1	1
High	Master Protein	A0A6C9L0I2	DUF826 domain-containing protein (Fragment) OS=Escherichia coli OX=562 GN=GKF20_24985 PE=4 SV=1	FALSE	5.143	23	1	1	1	60	6.5	4.36	3.43	1	1
High	Master Protein	A0A7U2W6B6	Phosphoenolpyruvate synthase OS=Escherichia coli O84:H7 OX=2697517 GN=ppsA PE=4 SV=1	FALSE	5.14	2	1	1	1	792	87.4	5.06	0	1	1
High	Master Protein	A0A0V9HAN9	6-N-hydroxylaminopurine detoxification oxidoreductase OS=Escherichia coli OX=562 GN=ycbX PE=4 SV=1	FALSE	5.11	13	2	2	2	369	40.6	7.65	2.07	2	1
High	Master Protein	A0A6M0PYF5	Carbamoyl-phosphate synthase large chain OS=Escherichia coli OX=562 GN=carB PE=3 SV=1	FALSE	5.082	3	2	2	1	1074	117.5	5.3	3.91	2	1
High	Master Protein	D6J9E2	YcgK protein OS=Escherichia coli B354 OX=550677 GN=ECEG_00493 PE=4 SV=1	FALSE	5.042	14	1	1	1	133	14.8	9.41	2.41	1	1
High	Master Protein	B6IB69	Ion-translocating oxidoreductase complex subunit G OS=Escherichia coli (strain SE11) OX=409438 GN=rsxG PE=3 SV=1	FALSE	5.015	11	2	2	2	206	21.9	7.11	2.02	2	1
High	Master Protein	D3QSR1	STAS domain-containing protein OS=Escherichia coli O55:H7 (strain CB9615 / EPEC) OX=701177 GN=yrbB PE=4 SV=1	FALSE	5.009	9	1	3	1	129	14.4	5.27	6.67	1	1
High	Master Protein	A0A0G4E7M5	CopG family protein OS=Escherichia coli OX=562 GN=pEC012_00005 PE=4 SV=1	FALSE	4.979	14	1	2	1	92	10.2	5.87	2.58	1	1
High	Master Protein	A0A3W5XSN4	Stress response protein ElaB OS=Escherichia coli OX=562 GN=elaB PE=3 SV=1	FALSE	4.976	19	2	2	2	101	11.3	5.57	2.5	2	1
High	Master Protein	A0A4C4JGS0	Protein-export membrane protein SecG OS=Escherichia coli OX=562 GN=secG PE=3 SV=1	FALSE	4.912	11	1	1	1	110	11.4	5.19	2.36	1	1
High	Master Protein	A0A0A1A5I2	Carbamoyl-phosphate synthase large chain OS=Escherichia coli OX=562 GN=carB PE=3 SV=1	FALSE	4.895	2	2	2	1	1073	117.8	5.34	1.73	2	1
High	Master Protein	Q1R392	t(6)A37 threonylcarbamoyladenosine biosynthesis protein TsaE OS=Escherichia coli (strain UTI89 / UPEC) OX=364106 GN=yjeE PE=3 SV=1	FALSE	4.888	10	1	1	1	153	16.9	4.65	3.13	1	1
High	Master Protein	A0A4C7B620	ABC transporter periplasmic binding protein OS=Escherichia coli OX=562 GN=osmF PE=4 SV=1	FALSE	4.882	8	3	4	3	305	32.5	5.54	8.09	3	1
High	Master Protein	C3SU32	7,8-dihydroneopterin aldolase OS=Escherichia coli OX=562 GN=ECs3941 PE=3 SV=1	FALSE	4.878	28	2	2	2	123	13.7	4.86	0	2	1
High	Master Protein	A0A3U2F9C9	Protein translocase subunit SecD OS=Escherichia coli OX=562 GN=secD PE=3 SV=1	FALSE	4.872	4	2	3	2	615	66.5	8.35	1.95	2	1
High	Master Protein	A0A1X3I9A4	YceB OS=Escherichia coli M056 OX=656415 GN=EAMG_00555 PE=4 SV=1	FALSE	4.784	7	1	1	1	205	22.6	5.94	2.68	1	1
High	Master Protein	A0A5F1DL70	ATP-dependent protease ATPase subunit HslU OS=Escherichia coli OX=562 GN=hslU PE=2 SV=1	FALSE	4.739	5	2	2	2	443	49.5	5.35	2.49	2	1
High	Master Protein	A0A6L2GIB8	Bacterioferritin (Fragment) OS=Escherichia coli OX=562 GN=bfr PE=3 SV=1	FALSE	4.715	8	1	2	1	151	17.6	4.67	2.24	1	1
High	Master Protein	A0A2T3TI53	Hexitol phosphatase HpxA OS=Escherichia coli OX=562 GN=hxpA PE=4 SV=1	FALSE	4.71	13	1	1	1	216	23	5.99	3.22	1	1
High	Master Protein	A0A7B9P086	Metalloprotease PmbA OS=Escherichia coli OX=562 GN=pmbA PE=3 SV=1	FALSE	4.695	9	2	2	2	450	48.4	5.6	1.64	2	1
High	Master Protein	A0A3R0ZNA0	30S ribosomal protein S9 OS=Escherichia coli OX=562 GN=rpsI PE=3 SV=1	FALSE	4.691	18	2	3	2	130	14.8	10.65	1.64	2	1
High	Master Protein	A0A454PLA1	5'-deoxynucleotidase YfbR OS=Escherichia coli OX=562 GN=yfbR PE=3 SV=1	FALSE	4.678	9	1	1	1	199	22.7	5.6	0	1	1
High	Master Protein	A0A1X3IMW3	Carboxy-S-adenosyl-L-methionine synthase OS=Escherichia coli E1114 OX=550691 GN=cmoA PE=3 SV=1	FALSE	4.676	8	2	2	2	247	27.8	5.77	4.22	2	1
High	Master Protein	D3QYN6	Type II secretion system core protein G OS=Escherichia coli O55:H7 (strain CB9615 / EPEC) OX=701177 GN=etpG PE=3 SV=1	FALSE	4.666	19	2	3	2	144	16.2	5.96	2.29	2	1
High	Master Protein	lcl	[locus_tag=EDL933_2643] [protein=ydiI hotdog fold superfamily] [protein_id=AIG68815.1] [location=complement(2459395..2459805)] [gbkey=CDS]	FALSE	4.638	15	1	1	1	136	14.8	7.43	0	1	1
High	Master Protein	A0A271UD00	L,D-transpeptidase OS=Escherichia coli OX=562 GN=BIU72_12085 PE=3 SV=1	FALSE	4.608	4	1	1	1	310	34.4	9.14	1.73	1	1
High	Master Protein	A0A0F3SRM4	Alcohol dehydrogenase OS=Escherichia coli OX=562 GN=yqhD PE=4 SV=1	FALSE	4.581	3	1	2	1	387	42.1	6	2.64	1	1
High	Master Protein	A0A210G1D5	LexA regulated protein OS=Escherichia coli OX=562 GN=ybfE PE=4 SV=1	FALSE	4.566	16	1	1	1	97	11.3	9.86	2.67	1	1
High	Master Protein	A0A7U9AWH8	Periplasmic oligopeptide-binding protein OS=Escherichia coli TA206 OX=656440 GN=ECKG_01101 PE=4 SV=1	FALSE	4.553	72	2	3	1	25	2.9	8.62	4.56	2	1
High	Master Protein	A0A0H0PZP2	Flagellar hook-associated protein 2 OS=Escherichia coli OX=562 GN=fliD PE=3 SV=1	FALSE	4.471	9	2	2	2	468	48.5	5.08	0	2	1
High	Master Protein	M9GYS6	Transposase family protein OS=Escherichia coli MP021561.2 OX=1116136 GN=ECMP0215612_4961 PE=3 SV=1	FALSE	4.455	19	2	2	2	91	10.6	7.14	3.12	2	1
High	Master Protein	A0A6M0PFL5	DNA-binding protein YbiB OS=Escherichia coli OX=562 GN=ybiB PE=4 SV=1	FALSE	4.453	6	2	2	1	322	35	7.2	2.83	2	1
High	Master Protein	A0A1X3LIG3	Protein YcgL OS=Escherichia coli TA054 OX=656433 GN=ycgL PE=3 SV=1	FALSE	4.427	19	1	1	1	108	12.4	9.13	2.75	1	1
High	Master Protein	A0A6M0PJJ4	Bis(5'-nucleosyl)-tetraphosphatase, symmetrical OS=Escherichia coli OX=562 GN=apaH PE=3 SV=1	FALSE	4.423	10	2	2	1	282	31.6	4.98	1.9	2	1
High	Master Protein	A0A3W5XZJ5	Multidrug export protein EmrA OS=Escherichia coli OX=562 GN=EAN77_13470 PE=3 SV=1	FALSE	4.361	6	2	4	2	390	42.7	9.33	4.3	2	1
High	Master Protein	A0A6M0PTC8	Superoxide dismutase OS=Escherichia coli OX=562 GN=sodB PE=3 SV=1	FALSE	4.354	9	1	1	1	192	21.4	6.42	3.14	1	1
High	Master Protein	A0A7D7TPN7	YjbQ family protein OS=Escherichia coli OX=562 GN=HZT35_15965 PE=3 SV=1	FALSE	4.243	10	1	2	1	138	15.7	6.8	4.49	1	1
High	Master Protein	A0A029HTN9	Signal transduction protein pmrD OS=Escherichia coli 2-005-03_S4_C3 OX=1444258 GN=pmrD PE=4 SV=1	FALSE	4.206	16	1	1	1	88	9.9	8.25	3.08	1	1
High	Master Protein	A0A0K3YS18	Protein/nucleic acid deglycase OS=Escherichia coli OX=562 GN=yhbO PE=3 SV=1	FALSE	4.189	15	1	1	1	172	18.9	5.47	2.28	1	1
High	Master Protein	D6IHI9	Regulator of ribonuclease activity B OS=Escherichia coli B185 OX=550676 GN=rraB PE=3 SV=1	FALSE	4.168	16	2	3	2	138	15.5	3.81	3.85	2	1
High	Master Protein	A0A2D0P626	Uncharacterized protein OS=Escherichia coli O127:H6 OX=168807 GN=yecH PE=4 SV=1	FALSE	4.123	18	1	2	1	79	8.7	5.69	4.85	1	1
High	Master Protein	D3QPM3	Uncharacterized protein OS=Escherichia coli O55:H7 (strain CB9615 / EPEC) OX=701177 GN=ygaM PE=3 SV=1	FALSE	4.112	10	1	1	1	113	12.3	8.02	2.25	1	1
High	Master Protein	A0A7U9G9W3	Putrescine-binding periplasmic protein OS=Escherichia coli H299 OX=656393 GN=ECOG_01550 PE=4 SV=1	FALSE	4.101	7	2	3	2	370	40.8	6.2	1.63	2	1
High	Master Protein	A0A080J6R6	tRNA threonylcarbamoyl adenosine modification protein, Sua5/YciO/YrdC/YwlC family OS=Escherichia coli 1-250-04_S3_C2 OX=1444163 GN=AC28_1417 PE=4 SV=1	FALSE	4.1	7	1	1	1	206	23.2	6.35	2.74	1	1
High	Master Protein	A0A5C9ARW6	Holliday junction branch migration protein RuvA (Fragment) OS=Escherichia coli OX=562 GN=ruvA PE=3 SV=1	FALSE	4.092	7	1	1	1	181	19.6	5.63	2.97	1	1
High	Master Protein	A0A0E0Y0J9	Outer membrane Lom OS=Escherichia coli O104:H4 (strain 2011C-3493) OX=1133852 GN=O3K_12600 PE=4 SV=1	FALSE	4.086	11	2	2	2	241	26.2	7.99	2.51	2	1
High	Master Protein	O85340	GDP-L-fucose synthase OS=Escherichia coli OX=562 GN=fcl PE=3 SV=1	FALSE	4.017	5	1	2	1	323	36.5	7.39	2.6	1	1
High	Master Protein	J7QJ23	Transcriptional regulator in 2-component system (Fragment) OS=Escherichia coli OX=562 GN=cpxR PE=4 SV=1	FALSE	4.004	9	1	1	1	158	17.8	4.68	2.69	1	1
High	Master Protein	A0A2W6NTH9	5-hydroxyisourate hydrolase (Fragment) OS=Escherichia coli OX=562 GN=uraH PE=3 SV=1	FALSE	3.983	28	2	2	2	93	10.8	8.37	4.67	2	1
High	Master Protein	A0A6M0PVA5	50S ribosomal protein L34 OS=Escherichia coli OX=562 GN=rpmH PE=3 SV=1	FALSE	3.96	17	1	4	1	46	5.4	13	9.25	1	1
High	Master Protein	A0A6M0PWU8	Small heat shock protein IbpB OS=Escherichia coli OX=562 GN=ibpB PE=3 SV=1	FALSE	3.95	13	1	2	1	157	17.4	5.02	3.49	1	1
High	Master Protein	G0FCV8	Diheme cytochrome c NapB OS=Escherichia coli UMNF18 OX=1050617 GN=UMNF18_2820 PE=3 SV=1	FALSE	3.927	15	2	2	2	134	14.5	7.37	4.64	2	1
High	Master Protein	A0A1Q5ZMQ3	Proline--tRNA ligase OS=Escherichia coli OX=562 GN=proS PE=3 SV=1	FALSE	3.868	3	1	1	1	572	63.6	5.19	4.11	1	1
High	Master Protein	A0A271QT01	Glycine cleavage system H protein OS=Escherichia coli OX=562 GN=gcvH PE=3 SV=1	FALSE	3.861	7	1	8	1	129	13.8	4.09	15.92	1	1
High	Master Protein	A0A4S1VEP3	NADH-quinone oxidoreductase subunit C/D OS=Escherichia coli OX=562 GN=nuoC PE=3 SV=1	FALSE	3.852	4	2	2	2	600	68.7	6.51	1.73	2	1
High	Master Protein	A0A085NXP0	DUF465 domain-containing protein OS=Escherichia coli OX=562 GN=AML35_28070 PE=4 SV=1	FALSE	3.819	22	2	3	2	74	8.9	9.31	4.49	2	1
High	Master Protein	A0A0L7ALZ3	ECA polysaccharide chain length modulation protein OS=Escherichia coli OX=562 GN=wzzE PE=3 SV=1	FALSE	3.812	3	1	3	1	348	39.4	6.65	6.19	1	1
High	Master Protein	A0A023Z1Y3	Programmed cell death toxin OS=Escherichia coli O145:H28 (strain RM12581) OX=1248823 GN=chpA PE=3 SV=1	FALSE	3.745	12	1	1	1	111	12.2	8.46	2.86	1	1
High	Master Protein	A0A1X3KTE0	RNA-binding protein YhbY OS=Escherichia coli H605 OX=656410 GN=EATG_03211 PE=4 SV=1	FALSE	3.735	10	1	1	1	116	13	9.94	2.13	1	1
High	Master Protein	A0A3W4D711	Leucine--tRNA ligase OS=Escherichia coli OX=562 GN=leuS PE=3 SV=1	FALSE	3.707	2	1	1	1	860	97.2	5.24	2.92	1	1
High	Master Protein	A0A1X3KRR4	DNA polymerase III, theta subunit OS=Escherichia coli H605 OX=656410 GN=EATG_00986 PE=4 SV=1	FALSE	3.703	12	1	2	1	105	12.2	9.54	5.32	1	1
High	Master Protein	A0A5E9SFL9	Uncharacterized protein OS=Escherichia coli OX=562 GN=E2135_07295 PE=4 SV=1	FALSE	3.702	13	1	1	1	96	11	5.9	2.41	1	1
High	Master Protein	E9YYR8	Methionine aminopeptidase OS=Escherichia coli M863 OX=656420 GN=map PE=3 SV=1	FALSE	3.612	8	2	2	2	264	29.3	5.96	0	2	1
High	Master Protein	A0A6M0PK57	Serine acetyltransferase OS=Escherichia coli OX=562 GN=cysE PE=3 SV=1	FALSE	3.604	7	2	2	2	273	29.2	6.52	4.11	2	1
High	Master Protein	sp	SODC_HUMAN	TRUE	3.601	7	1	2	1	153	15.8	6.13	5.95	1	1
High	Master Protein	A0A768K1M3	UPF0352 protein YejL OS=Escherichia coli OX=562 GN=yejL PE=3 SV=1	FALSE	3.589	13	1	2	1	75	8.3	5.78	1.91	1	1
High	Master Protein	A0A3W3CR84	AcfC family adhesin Paa OS=Escherichia coli OX=562 GN=paa PE=4 SV=1	FALSE	3.584	6	1	1	1	252	27.7	6.38	2.48	1	1
High	Master Protein	A0A1Q6AGB1	D-alanine--D-alanine ligase OS=Escherichia coli OX=562 GN=ddl PE=3 SV=1	FALSE	3.577	4	1	1	1	306	32.8	4.84	2.41	1	1
High	Master Protein	A0A0A0FFA6	Cysteine desulfurase OS=Escherichia coli G3/10 OX=1455601 GN=sufS PE=3 SV=1	FALSE	3.577	5	1	1	1	406	44.4	6.34	0	1	1
High	Master Protein	A0A444RHX9	ATP-dependent metalloprotease (Fragment) OS=Escherichia coli OX=562 GN=hflB PE=4 SV=1	FALSE	3.548	6	2	2	2	339	37.3	6.76	2.41	2	1
High	Master Protein	A0A1Q4PF61	NiFe hydrogenase OS=Escherichia coli OX=562 GN=BMT49_07565 PE=3 SV=1	FALSE	3.547	7	2	2	2	372	40.6	7.14	0	2	1
High	Master Protein	sp	CYB5_HUMAN	TRUE	3.495	7	1	1	1	133	15.2	4.96	2.61	1	1
High	Master Protein	E9XGR8	Short chain dehydrogenase OS=Escherichia coli TW10509 OX=656449 GN=ERFG_00263 PE=4 SV=1	FALSE	3.479	8	2	2	2	294	31.4	6.8	3.76	2	1
High	Master Protein	K4WHW3	Serine-type D-Ala-D-Ala carboxypeptidase OS=Escherichia coli O111:H11 str. CVM9455 OX=1165939 GN=ECO9455_11896 PE=3 SV=1	FALSE	3.474	4	2	2	2	403	44.4	8.54	2.08	2	1
High	Master Protein	A0A1X3J6X2	Putative acyl-CoA dehydrogenase OS=Escherichia coli TA447 OX=656447 GN=ECXG_02713 PE=3 SV=1	FALSE	3.469	3	1	1	1	546	61	7.33	2.15	1	1
High	Master Protein	A0A6M9R9V0	Glucosamine-6-phosphate deaminase OS=Escherichia coli OX=562 GN=nagB PE=3 SV=1	FALSE	3.455	9	2	2	2	266	29.7	6.74	1.65	2	1
High	Master Protein	A0A070UYQ6	Lipopolysaccharide export system protein LptC OS=Escherichia coli 2-177-06_S3_C2 OX=1444151 GN=lptC PE=3 SV=1	FALSE	3.448	8	2	2	2	191	21.7	6.81	0	2	1
High	Master Protein	A0A348E5S4	ABC-type organic solvent transporter OS=Escherichia coli OX=562 GN=mlaD PE=4 SV=1	FALSE	3.417	12	1	1	1	186	19.9	5.2	2.02	1	1
High	Master Protein	A0A152X889	L,D-transpeptidase OS=Escherichia coli OX=562 GN=ldtD PE=3 SV=1	FALSE	3.397	2	1	2	1	615	67.8	8.73	4.5	1	1
High	Master Protein	A0A080GHG8	Molybdopterin adenylyltransferase OS=Escherichia coli 1-392-07_S4_C3 OX=1444275 GN=mog PE=4 SV=1	FALSE	3.371	6	1	1	1	195	21.1	5	2.6	1	1
High	Master Protein	A0A4V3QNY6	Uncharacterized protein OS=Escherichia coli OX=562 GN=ymdF_2 PE=4 SV=1	FALSE	3.345	17	1	1	1	60	6.2	9.99	2.36	1	1
High	Master Protein	A0A1V3VVP5	DUF1315 domain-containing protein OS=Escherichia coli OX=562 GN=yeaC PE=4 SV=1	FALSE	3.322	13	1	1	1	90	10.3	4.93	2.14	1	1
High	Master Protein	A0A4D0EP09	DUF3261 domain-containing protein OS=Escherichia coli OX=562 GN=BvCmsKSP026_04874 PE=4 SV=1	FALSE	3.318	13	1	1	1	194	21.4	9.7	2.47	1	1
High	Master Protein	A0A0L7AM70	Assembly protein OS=Escherichia coli OX=562 GN=asmA PE=4 SV=1	FALSE	3.278	1	1	2	1	617	68.9	5.48	2.42	1	1
High	Master Protein	A0A029ILY4	Thioredoxin OS=Escherichia coli 2-005-03_S4_C2 OX=1444228 GN=AC93_2764 PE=3 SV=1	FALSE	3.268	9	1	1	1	139	15.5	5.17	0	1	1
High	Master Protein	A0A3L9GVF5	Sec-independent protein translocase protein TatA OS=Escherichia coli OX=562 GN=tatA PE=3 SV=1	FALSE	3.246	11	1	1	1	89	9.7	7.24	3.05	1	1
High	Master Protein	A0A368IV19	H(+)-transporting two-sector ATPase OS=Escherichia coli OX=562 GN=lgiI PE=3 SV=1	FALSE	3.241	3	1	2	1	446	47.9	6.95	1.78	1	1
High	Master Protein	V0Z701	Hydrogenase maturation peptidase HycI OS=Escherichia coli 908573 OX=1268998 GN=HMPREF1611_04172 PE=3 SV=1	FALSE	3.17	14	1	1	1	145	16	4.27	2.4	1	1
High	Master Protein	A0A1X3M085	Nucleoside permease OS=Escherichia coli TA249 OX=656441 GN=EAZG_02456 PE=3 SV=1	FALSE	3.166	3	1	1	1	400	43.5	8.48	2.09	1	1
High	Master Protein	A0A271UAW6	Catabolite activator protein OS=Escherichia coli OX=562 GN=BIU72_15430 PE=4 SV=1	FALSE	3.157	8	2	2	2	210	23.6	8.76	1.87	2	1
High	Master Protein	A0A3J6PAL4	Helix-turn-helix domain-containing protein OS=Escherichia coli OX=562 GN=BvCmsOUP014_03033 PE=4 SV=1	FALSE	3.149	11	1	1	1	133	15.3	9	0	1	1
High	Master Protein	A0A3I9VQH5	3-methyl-2-oxobutanoate hydroxymethyltransferase OS=Escherichia coli OX=562 GN=panB PE=3 SV=1	FALSE	3.139	4	1	1	1	264	28.3	5.6	2.03	1	1
High	Master Protein	A0A7D4MMA4	Cell division protein YtfB OS=Escherichia coli O10:H32 OX=2603836 GN=ytfB PE=4 SV=1	FALSE	3.13	9	1	1	1	212	23.5	5.22	2.06	1	1
High	Master Protein	A0A7U2WA61	Acetylornithine deacetylase OS=Escherichia coli O84:H7 OX=2697517 GN=argE PE=4 SV=1	FALSE	3.122	6	2	2	2	383	42.3	5.9	2.18	2	1
High	Master Protein	A0A1X3KTD0	Putative transcriptional regulator (BolA family) OS=Escherichia coli H605 OX=656410 GN=EATG_03201 PE=3 SV=1	FALSE	3.116	26	2	2	2	89	10.1	5.36	2.96	2	1
High	Master Protein	A0A1X3HY89	D-mannonate oxidoreductase (Fructuronate reductase) OS=Escherichia coli M056 OX=656415 GN=EAMG_02582 PE=4 SV=1	FALSE	3.107	3	1	1	1	486	53.7	5.44	2.43	1	1
High	Master Protein	A0A6L2GCV6	YhfL family protein (Fragment) OS=Escherichia coli OX=562 GN=EB525_RS06370 PE=4 SV=1	FALSE	3.106	31	1	1	1	52	5.4	7.9	2.39	1	1
High	Master Protein	A0A0H3EPK7	Sulfatase domain-containing protein OS=Escherichia coli O83:H1 (strain NRG 857C / AIEC) OX=685038 GN=NRG857_19760 PE=4 SV=1	FALSE	3.093	3	2	2	2	577	66.6	7.15	3.85	2	1
High	Master Protein	A0A067H9Y3	Restriction endonuclease subunit S OS=Escherichia coli OX=562 GN=hsdS PE=3 SV=1	FALSE	3.087	2	1	1	1	428	48.1	7.05	2.25	1	1
High	Master Protein	A0A5D7BMX1	TraR/DksA family transcriptional regulator OS=Escherichia coli OX=562 GN=E0L12_28125 PE=4 SV=1	FALSE	3.083	51	2	2	2	72	8.3	5.41	0	2	1
High	Master Protein	A0A3Q0P917	DnaA initiator-associating protein DiaA OS=Escherichia coli OX=562 GN=diaA PE=3 SV=1	FALSE	3.083	4	1	1	1	196	21	5.76	2.74	1	1
High	Master Protein	A0A1X3K9N5	Periplasmic protein CpxP OS=Escherichia coli H605 OX=656410 GN=EATG_03936 PE=3 SV=1	FALSE	3.04	8	1	1	1	167	19	6.96	1.9	1	1
High	Master Protein	A0A3L9HZ69	Ribonuclease E (Fragment) OS=Escherichia coli OX=562 GN=rne PE=4 SV=1	FALSE	3.019	6	1	1	1	216	23.1	4.01	2.76	1	1
High	Master Protein	A0A0K4L3Y8	50S ribosomal protein L20 OS=Escherichia coli OX=562 GN=rplT PE=3 SV=1	FALSE	2.996	7	1	1	1	118	13.5	11.47	1.7	1	1
High	Master Protein	A0A0K3S4Q2	4Fe-4S binding protein OS=Escherichia coli OX=562 GN=yfhL PE=4 SV=1	FALSE	2.994	26	2	3	2	86	9.8	5.38	2.04	2	1
High	Master Protein	A0A7U9LZN9	Uncharacterized protein OS=Escherichia coli O145:H28 OX=1078034 GN=yciF PE=4 SV=1	FALSE	2.982	7	1	1	1	166	18.6	5.44	2.08	1	1
High	Master Protein	A0A7X1MN97	50S ribosomal protein L36 OS=Escherichia coli OX=562 GN=DL637_23270 PE=4 SV=1	FALSE	2.976	21	1	3	1	38	4.3	10.61	4.28	1	1
High	Master Protein	D6IH55	Cell division protein OS=Escherichia coli B185 OX=550676 GN=ECDG_02536 PE=4 SV=1	FALSE	2.956	2	1	1	1	547	61.6	6.96	2.5	1	1
High	Master Protein	A0A377CQF9	D-xylose ABC transporter substrate-binding protein OS=Escherichia coli OX=562 GN=xylF PE=4 SV=1	FALSE	2.93	6	2	2	2	330	35.7	5.48	2.04	2	1
High	Master Protein	D6JCG1	o-succinylbenzoate synthase OS=Escherichia coli B354 OX=550677 GN=menC PE=3 SV=1	FALSE	2.876	7	2	2	2	320	35.5	4.92	4.5	2	1
High	Master Protein	C3T1U2	Uncharacterized protein OS=Escherichia coli OX=562 GN=ECs3209 PE=4 SV=1	FALSE	2.866	11	1	1	1	92	10	4.48	0	1	1
High	Master Protein	A0A234Y764	Lipoprotein YgeR OS=Escherichia coli OX=562 GN=DMZ30_12905 PE=4 SV=1	FALSE	2.866	8	2	2	2	251	26.6	10.11	2.48	2	1
High	Master Protein	A0A1U9SWD8	Ketodeoxygluconokinase OS=Escherichia coli OX=562 GN=BE963_08665 PE=4 SV=1	FALSE	2.859	7	1	1	1	309	34.1	4.98	2.29	1	1
High	Master Protein	A0A6M0PZR8	DNA-binding protein Fis OS=Escherichia coli OX=562 GN=fis PE=3 SV=1	FALSE	2.852	9	1	1	1	98	11.2	9.35	0	1	1
High	Master Protein	A0A070UCF2	3-ketoacyl-CoA thiolase OS=Escherichia coli 2-177-06_S3_C2 OX=1444151 GN=fadA PE=3 SV=1	FALSE	2.842	4	1	1	1	387	40.8	6.8	0	1	1
High	Master Protein	A0A2H9A5A1	AAA family ATPase OS=Escherichia coli OX=562 GN=ftsH_2 PE=4 SV=1	FALSE	2.827	2	1	1	1	328	37.1	8.25	1.94	1	1
High	Master Protein	A0A271QLV6	UPF0178 protein YaiI OS=Escherichia coli OX=562 GN=yaiI PE=3 SV=1	FALSE	2.819	9	1	1	1	152	16.9	5.36	2.11	1	1
High	Master Protein	A0A3A6S7D1	Translation inhibitor protein RaiA (Fragment) OS=Escherichia coli OX=562 GN=D3821_30300 PE=4 SV=1	FALSE	2.702	21	1	2	1	42	4.8	5.29	0	1	1
High	Master Protein	A0A4S1Q4Q6	Furfural resistance protein OS=Escherichia coli OX=562 GN=ucpA PE=4 SV=1	FALSE	2.702	8	2	2	2	263	27.8	5.17	2.13	2	1
High	Master Protein	A0A7L7WQK4	Succinate dehydrogenase iron-sulfur subunit SdhB OS=Escherichia coli O15:H12 OX=2773704 GN=sdhB PE=4 SV=1	FALSE	2.696	4	1	1	1	238	26.8	6.34	1.73	1	1
High	Master Protein	A0A2A6Q7T0	Aldo/keto reductase OS=Escherichia coli OX=562 GN=BER14_12505 PE=4 SV=1	FALSE	2.679	6	1	1	1	294	33.2	6.18	0	1	1
High	Master Protein	A0A6S5RBX2	Sulfurtransferase OS=Escherichia coli OX=562 GN=tusE PE=3 SV=1	FALSE	2.66	9	1	1	1	128	14.6	7.94	2.51	1	1
High	Master Protein	A0A1X3LXM2	3-hydroxy-5-phosphonooxypentane-2,4-dione thiolase OS=Escherichia coli TA249 OX=656441 GN=lsrF PE=3 SV=1	FALSE	2.642	3	1	1	1	291	31.8	6.09	1.82	1	1
High	Master Protein	A0A6C9Q9Y8	RNA chaperone ProQ (Fragment) OS=Escherichia coli OX=562 GN=proQ PE=3 SV=1	FALSE	2.549	4	1	1	1	206	22.8	9.79	1.61	1	1
High	Master Protein	A0A376KYU3	Peptidyl-prolyl cis-trans isomerase OS=Escherichia coli OX=562 GN=ppiB PE=3 SV=1	FALSE	2.547	6	1	1	1	157	17.6	8.44	2.6	1	1
High	Master Protein	V8K354	N-acetylmuramoyl-L-alanine amidase OS=Escherichia coli LAU-EC10 OX=1417796 GN=V415_20620 PE=4 SV=1	FALSE	2.506	7	2	2	2	289	31.4	10.13	4.33	2	1
High	Master Protein	A0A7U8Y6Y8	D-tyrosyl-tRNA(Tyr) deacylase OS=Escherichia coli O157:H7 OX=83334 GN=dtd PE=4 SV=1	FALSE	2.506	8	1	1	1	145	15.9	4.88	0	1	1
High	Master Protein	A0A069XJD7	Flagellar motor switch protein FliN OS=Escherichia coli 3-373-03_S4_C2 OX=1444252 GN=fliN PE=3 SV=1	FALSE	2.499	7	1	1	1	137	14.8	4.61	0	1	1
High	Master Protein	A0A7Z8HVP1	Aldehyde dehydrogenase family protein OS=Escherichia coli OX=562 GN=E5S43_08530 PE=4 SV=1	FALSE	2.483	2	1	1	1	499	53.8	5.63	2.73	1	1
High	Master Protein	A0A7A8WV30	Nitrate reductase (quinone) OS=Escherichia coli OX=562 GN=EA211_23320 PE=3 SV=1	FALSE	2.468	1	1	1	1	1247	140.5	6.54	0	1	1
High	Master Protein	M9H9S5	4-hydroxythreonine-4-phosphate dehydrogenase OS=Escherichia coli MP021561.2 OX=1116136 GN=pdxA PE=3 SV=1	FALSE	2.464	5	1	1	1	329	35.2	5.73	2.06	1	1
High	Master Protein	E1IKT7	4Fe-4S binding domain protein OS=Escherichia coli MS 145-7 OX=679204 GN=HMPREF9348_00720 PE=4 SV=1	FALSE	2.45	4	1	1	1	289	32.1	6.81	2.47	1	1
High	Master Protein	A0A5D4IAP2	Phage tail tape measure protein OS=Escherichia coli OX=562 GN=FY127_25945 PE=4 SV=1	FALSE	2.43	2	2	3	2	911	99.8	9.38	1.64	2	1
High	Master Protein	A0A037YHS0	Pyrimidine-specific ribonucleoside hydrolase RihA OS=Escherichia coli OX=562 GN=rihA PE=3 SV=1	FALSE	2.427	3	1	1	1	311	33.8	4.97	0	1	1
High	Master Protein	A0A0K3R644	L-arabinose-binding periplasmic protein OS=Escherichia coli OX=562 GN=araF PE=3 SV=1	FALSE	2.415	4	1	1	1	329	35.5	6.96	0	1	1
High	Master Protein	A0A6M0PJ16	Flagellar hook-associated protein 1 OS=Escherichia coli OX=562 GN=flgK PE=3 SV=1	FALSE	2.414	3	1	1	1	554	58.5	4.83	0	1	1
High	Master Protein	A0A140NCW9	Uncharacterized protein OS=Escherichia coli (strain B / BL21-DE3) OX=469008 GN=ECBD_3905 PE=4 SV=1	FALSE	2.376	14	1	1	1	76	8.5	8.75	1.65	1	1
High	Master Protein	A0A6M0PYT3	Phospholipid-binding protein MlaC OS=Escherichia coli OX=562 GN=mlaC PE=4 SV=1	FALSE	2.345	6	1	1	1	213	24.1	9.19	2.44	1	1
High	Master Protein	A0A1M2J1G7	Glycine zipper 2TM domain-containing protein OS=Escherichia coli OX=562 GN=ycfJ PE=4 SV=1	FALSE	2.335	5	1	1	1	179	18.9	9.41	2.19	1	1
High	Master Protein	A0A6H1Q4R4	Error-prone, lesion bypass DNA polymerase V (UmuC) OS=Escherichia coli OX=562 PE=3 SV=1	FALSE	2.302	4	1	2	1	395	43.3	9.7	1.63	1	1
High	Master Protein	A0A5F1DPN3	Acyl-CoA thioesterase II OS=Escherichia coli OX=562 GN=CQB02_16775 PE=3 SV=1	FALSE	2.271	3	1	1	1	286	32	6.67	2.23	1	1
High	Master Protein	A0A5P0Z1X7	Cytochrome c-type biogenesis protein OS=Escherichia coli OX=562 GN=E4K60_03025 PE=3 SV=1	FALSE	2.249	3	1	1	1	350	39.1	7.28	1.62	1	1
High	Master Protein	A0A7I8YSK1	2-hydroxy-3-oxopropionate reductase OS=Escherichia coli OX=562 GN=garR_1 PE=3 SV=1	FALSE	2.24	4	1	1	1	296	30.7	5.9	1.61	1	1
High	Master Protein	V0ADZ5	Zinc metalloprotease OS=Escherichia coli 907713 OX=1268986 GN=HMPREF1599_01508 PE=3 SV=1	FALSE	2.237	2	1	2	1	450	49	6.81	2.67	1	1
High	Master Protein	lcl	[locus_tag=EDL933_5125] [protein=Frataxin-like protein CyaY, facilitates iron supply for heme A synthesis or Fe-S cluster assembly] [protein_id=AIG71264.1] [location=complement(4875023..4875343)] [gbkey=CDS]	FALSE	2.235	17	1	1	1	106	12.2	4.49	0	1	1
High	Master Protein	A0A0H3PKV9	YehR OS=Escherichia coli O157:H7 (strain EC869) OX=478008 GN=ECH7EC869_2358 PE=4 SV=1	FALSE	2.215	15	1	1	1	48	5.2	6.62	2.18	1	1
High	Master Protein	A0A0K4AW81	Membrane-bound lytic murein transglycosylase C OS=Escherichia coli OX=562 GN=mltC PE=3 SV=1	FALSE	2.215	5	1	1	1	359	40.2	9.41	1.97	1	1
High	Master Protein	A0A026V917	Transcriptional repressor MprA OS=Escherichia coli O174:H8 str. 04-3038 OX=1446704 GN=BW70_16420 PE=4 SV=1	FALSE	2.209	7	1	1	1	176	20.6	6.42	2.09	1	1
High	Master Protein	A0A478FTT0	Phage tail component OS=Escherichia coli OX=562 GN=BvCms12BK_00232 PE=4 SV=1	FALSE	2.2	1	1	1	1	749	79.2	4.65	0	1	1
High	Master Protein	E9XQK9	Aconitate hydratase B OS=Escherichia coli TW10509 OX=656449 GN=ERFG_03356 PE=3 SV=1	FALSE	2.195	1	1	1	1	865	93.4	5.36	0	1	1
High	Master Protein	A0A3H7U0U0	Pyrimidine/purine nucleoside phosphorylase (Fragment) OS=Escherichia coli OX=562 GN=ED607_24880 PE=4 SV=1	FALSE	2.169	14	1	1	1	79	8.5	4.26	0	1	1
High	Master Protein	A0A1X3K9R0	Guanylate kinase OS=Escherichia coli H605 OX=656410 GN=gmk PE=3 SV=1	FALSE	2.165	8	1	1	1	226	25.8	7.69	0	1	1
High	Master Protein	A0A6M7GUE3	Type II toxin-antitoxin system PrlF family antitoxin OS=Escherichia coli O157:H7 OX=83334 GN=E3158_03540 PE=4 SV=1	FALSE	2.156	10	1	1	1	119	13.4	6.54	0	1	1
High	Master Protein	E9TM81	Isochorismatase family protein OS=Escherichia coli MS 117-3 OX=749539 GN=HMPREF9542_04949 PE=4 SV=1	FALSE	2.153	4	1	1	1	219	24.1	4.83	1.71	1	1
High	Master Protein	A0A3R1BCA9	Endoribonuclease YbeY OS=Escherichia coli OX=562 GN=ybeY PE=3 SV=1	FALSE	2.152	10	1	1	1	155	17.5	4.3	1.93	1	1
High	Master Protein	A0A2A6QBX6	CTP synthase OS=Escherichia coli OX=562 GN=pyrG PE=3 SV=1	FALSE	2.147	2	1	1	1	545	60.4	5.94	1.7	1	1
High	Master Protein	A0A444R098	IcmF_C domain-containing protein (Fragment) OS=Escherichia coli OX=562 GN=EPS76_35620 PE=4 SV=1	FALSE	2.146	4	1	1	1	193	22	6.6	2.01	1	1
High	Master Protein	A0A454A425	Respiratory nitrate reductase 2 beta chain OS=Escherichia coli O6:K15:H31 (strain 536 / UPEC) OX=362663 GN=ECP_1469 PE=4 SV=1	FALSE	2.14	2	1	1	1	514	58.4	5.92	2.31	1	1
High	Master Protein	A0A327I5F3	Uncharacterized protein OS=Escherichia coli OX=562 GN=D3C88_28055 PE=4 SV=1	FALSE	2.139	1	1	2	1	705	75.6	8.07	3.44	1	1
High	Master Protein	A0A3L3VQ07	Xylulose kinase OS=Escherichia coli OX=562 GN=xylB PE=3 SV=1	FALSE	2.138	4	1	1	1	484	52.6	5.8	0	1	1
High	Master Protein	W8ZN48	Glycine cleavage system H protein OS=Escherichia coli O25b:H4-ST131 OX=941322 GN=gcvH PE=3 SV=1	FALSE	2.129	8	1	1	1	130	13.9	4.09	2.3	1	1
High	Master Protein	A0A0J2GU72	DUF1615 domain-containing protein OS=Escherichia coli OX=562 GN=yaiW PE=4 SV=1	FALSE	2.102	3	1	1	1	364	40.4	9.6	0	1	1
High	Master Protein	A0A426PNN8	dCTP deaminase OS=Escherichia coli OX=562 GN=dcd PE=3 SV=1	FALSE	2.087	7	1	2	1	193	21.2	6.13	0	1	1
High	Master Protein	A0A4S1NY85	Porphyrinogen oxidase OS=Escherichia coli OX=562 GN=yfeX PE=4 SV=1	FALSE	2.057	4	1	1	1	299	33	5.67	0	1	1
High	Master Protein	A0A377LD45	Murein hydrolase B OS=Escherichia coli OX=562 GN=mltB_2 PE=4 SV=1	FALSE	1.978	8	1	2	1	160	17.5	7.62	4.31	1	1
High	Master Protein	A0A1X3J703	Glutaminase OS=Escherichia coli TA447 OX=656447 GN=glsA PE=3 SV=1	FALSE	1.975	3	1	1	1	310	32.9	5.07	1.64	1	1
High	Master Protein	E1J5M5	RecF/RecN/SMC N-terminal domain protein OS=Escherichia coli MS 124-1 OX=679205 GN=HMPREF9347_02204 PE=4 SV=1	FALSE	1.968	2	1	1	1	399	45.5	5.74	1.86	1	1
High	Master Protein	A0A0F3UW28	Purine nucleoside phosphorylase OS=Escherichia coli OX=562 GN=yfiH PE=3 SV=1	FALSE	1.959	4	1	2	1	243	26.3	6.39	1.92	1	1
High	Master Protein	A0A7U8MRZ3	Sel1 repeat family protein OS=Escherichia coli O157:H7 OX=83334 GN=CQJ22_005142 PE=4 SV=1	FALSE	1.947	4	1	1	1	181	20.4	5.05	0	1	1
High	Master Protein	A0A2D0NLN3	UDP-N-acetylglucosamine acyltransferase OS=Escherichia coli O127:H6 OX=168807 GN=lpxA PE=4 SV=1	FALSE	1.934	6	1	1	1	145	15.6	7.87	1.82	1	1
High	Master Protein	A0A7U8QMA2	Nitrate/nitrite two-component system sensor histidine kinase NarX OS=Escherichia coli O11 OX=1095705 GN=narX PE=4 SV=1	FALSE	1.913	1	1	1	1	812	90.6	6.58	2.09	1	1
High	Master Protein	Q8XEB8	Isochorismatase domain-containing protein OS=Escherichia coli O157:H7 OX=83334 GN=ycaC PE=4 SV=2	FALSE	1.909	12	1	1	1	208	23.1	5.41	0	1	1
High	Master Protein	A0A6M0PXA3	DUF1778 domain-containing protein OS=Escherichia coli OX=562 GN=G4V03_11595 PE=4 SV=1	FALSE	1.882	7	1	1	1	94	11	5.54	1.95	1	1
High	Master Protein	F4SMA0	Capsule polysaccharide export protein OS=Escherichia coli H736 OX=656414 GN=ECHG_01943 PE=3 SV=1	FALSE	1.87	2	1	1	1	376	41.3	6.96	1.83	1	1
High	Master Protein	A0A3R0I3N3	Spermidine N1-acetyltransferase OS=Escherichia coli O26 OX=404399 GN=speG PE=4 SV=1	FALSE	1.861	6	1	1	1	186	21.9	6.52	0	1	1
High	Master Protein	A0A6M0PZ60	PTS ascorbate transporter subunit IIC OS=Escherichia coli OX=562 GN=G4V03_16910 PE=4 SV=1	FALSE	1.857	2	1	1	1	461	48.9	9.28	0	1	1
High	Master Protein	A0A3W5Y261	Uncharacterized lipoprotein YsaB OS=Escherichia coli OX=562 GN=EAN77_18410 PE=4 SV=1	FALSE	1.846	26	1	1	1	99	11.3	8.31	0	1	1
High	Master Protein	A0A0K4H152	Glutamate dehydrogenase OS=Escherichia coli OX=562 GN=gdhA PE=3 SV=1	FALSE	1.839	4	1	1	1	447	48.6	6.4	0	1	1
High	Master Protein	E1J0U8	3,4-dihydroxy-2-butanone 4-phosphate synthase OS=Escherichia coli MS 124-1 OX=679205 GN=ribB PE=3 SV=1	FALSE	1.838	7	1	2	1	217	23.3	5.01	0	1	1
High	Master Protein	F4SR33	Phosphopantetheine adenylyltransferase OS=Escherichia coli H736 OX=656414 GN=coaD PE=3 SV=1	FALSE	1.811	6	1	1	1	194	22.1	8.48	0	1	1
High	Master Protein	A0A152V2F5	Phage repressor protein OS=Escherichia coli OX=562 GN=ARC77_04460 PE=4 SV=1	FALSE	1.765	11	1	1	1	134	14.8	8.38	0	1	1
High	Master Protein	F4NIT0	GroES-like protein OS=Escherichia coli D9 OX=556266 GN=SSJG_02075 PE=3 SV=1	FALSE	1.744	3	1	1	1	357	39.2	6.1	2.13	1	1
High	Master Protein	A0A7U8ZDK1	Aminopeptidase N OS=Escherichia coli FVEC1412 OX=656380 GN=ECGG_02626 PE=4 SV=1	FALSE	1.74	2	1	1	1	870	98.9	5.25	0	1	1
High	Master Protein	A0A3I9MFM2	Type II toxin-antitoxin system RelE/ParE family toxin OS=Escherichia coli OX=562 GN=ED225_19920 PE=4 SV=1	FALSE	1.738	8	1	1	1	112	13.2	8.98	1.85	1	1
High	Master Protein	A0A6C9SP06	Stress-induced protein OS=Escherichia coli OX=562 GN=GKG31_04665 PE=4 SV=1	FALSE	1.728	18	1	2	1	57	5.8	9.61	3.53	1	1
High	Master Protein	A0A7U9FT74	Phosphoribosylaminoimidazolecarboxamide formyltransferase/IMP cyclohydrolase OS=Escherichia coli TA206 OX=656440 GN=ECKG_05025 PE=4 SV=1	FALSE	1.71	2	1	1	1	529	57.3	5.88	0	1	1
High	Master Protein	A0A6M9RVD5	3-oxoacyl-ACP reductase FabG OS=Escherichia coli OX=562 GN=fabG PE=4 SV=1	FALSE	1.674	3	1	1	1	239	25.9	7.78	2.36	1	1
High	Master Protein	A0A792X0R1	Uncharacterized protein OS=Escherichia coli OX=562 GN=ETECE1441_04400 PE=4 SV=1	FALSE	1.671	6	1	1	1	147	16.3	5.48	0	1	1
High	Master Protein	A0A1M2TU90	Uncharacterized protein OS=Escherichia coli OX=562 GN=EXX13_26445 PE=4 SV=1	FALSE	1.65	4	1	1	1	250	27.6	8.73	0	1	1
High	Master Protein	A0A7Z2UHN6	Formate hydrogenlyase subunit HycG OS=Escherichia coli OX=562 GN=hycG PE=4 SV=1	FALSE	1.643	9	1	1	1	255	28.1	6.3	0	1	1
High	Master Protein	U9YI33	Cysteine-rich domain protein OS=Escherichia coli 113303 OX=1268978 GN=HMPREF1591_00521 PE=4 SV=1	FALSE	1.64	5	1	1	1	222	24.2	6.74	0	1	1
High	Master Protein	A0A6D0SMA5	DNA primase OS=Escherichia coli OX=562 GN=GUI34_25985 PE=4 SV=1	FALSE	1.638	5	1	1	1	321	36.9	8.7	0	1	1
High	Master Protein	A0A423BW77	UDP-N-acetylglucosamine 1-carboxyvinyltransferase OS=Escherichia coli OX=562 GN=murA PE=3 SV=1	FALSE	1.632	3	1	1	1	419	44.8	6.16	0	1	1
High	Master Protein	A0A085P2C0	Excisionase OS=Escherichia coli OX=562 GN=AML35_07955 PE=4 SV=1	FALSE	1.631	11	1	1	1	84	9.5	8.85	0	1	1
High	Master Protein	A0A1M0CSP5	RNA-binding protein Hfq OS=Escherichia coli OX=562 GN=hfq PE=3 SV=1	FALSE	1.63	13	1	1	1	102	11.2	7.65	0	1	1
High	Master Protein	F4SHE1	Cysteine synthase OS=Escherichia coli H736 OX=656414 GN=ECHG_02313 PE=3 SV=1	FALSE	1.626	5	1	1	1	329	35.9	7.5	0	1	1
High	Master Protein	A0A073H5W8	ADP-ribose diphosphatase OS=Escherichia coli 5-366-08_S1_C3 OX=1444102 GN=nudF PE=3 SV=1	FALSE	1.61	5	1	2	1	209	23.6	5.24	2.28	1	1
High	Master Protein	sp	ALDOA_RABIT	TRUE	1.6	2	1	1	1	360	38.8	8.09	2.38	1	1
High	Master Protein	A0A6M7GW78	Uncharacterized protein OS=Escherichia coli O157:H7 OX=83334 GN=E3157_13140 PE=4 SV=1	FALSE	1.593	21	1	1	1	57	5.9	9.36	0	1	1
High	Master Protein	A0A7I6SV18	Transposase OS=Escherichia coli OX=562 GN=WP5S18E09_42020 PE=4 SV=1	FALSE	1.591	2	1	1	1	295	33.7	9.52	1.97	1	1
High	Master Protein	B7MTR5	Phosphatase NudJ OS=Escherichia coli O81 (strain ED1a) OX=585397 GN=ymfB PE=3 SV=1	FALSE	1.586	11	1	1	1	153	17.5	5.14	0	1	1
High	Master Protein	A0A4C3QGH9	Uncharacterized protein OS=Escherichia coli OX=562 GN=BvCmsHHP019_03734 PE=4 SV=1	FALSE	1.564	6	1	1	1	167	17.4	9.33	1.7	1	1
High	Master Protein	A0A377C5Z7	Murein hydrolase B OS=Escherichia coli OX=562 GN=mltB PE=4 SV=1	FALSE	1.563	3	1	1	1	269	30	9.66	1.92	1	1
High	Master Protein	A0A3H9GML7	Putative lipoprotein OS=Escherichia coli OX=562 GN=BvCmsKSP058_03365 PE=4 SV=1	FALSE	1.56	10	1	1	1	125	13.7	9.54	0	1	1
High	Master Protein	A0A7A3C1F7	Alpha-glycosidase OS=Escherichia coli OX=562 GN=HJ980_001092 PE=4 SV=1	FALSE	1.537	1	1	1	1	599	70.1	5.25	0	1	1
High	Master Protein	H4LLD9	N-acetylneuraminate epimerase OS=Escherichia coli DEC2E OX=868142 GN=nanM PE=3 SV=1	FALSE	1.535	2	1	1	1	368	39.6	7.68	1.85	1	1
High	Master Protein	A0A023Z530	Secretion system effector espB OS=Escherichia coli O145:H28 (strain RM12581) OX=1248823 GN=espB PE=4 SV=1	FALSE	1.532	3	1	1	1	302	31.5	5.6	0	1	1
High	Master Protein	A0A6D0T457	Stress response kinase A OS=Escherichia coli OX=562 GN=srkA PE=3 SV=1	FALSE	1.529	4	1	1	1	328	38.1	5.07	0	1	1
High	Master Protein	A0A3T3ZUL6	Phage tail tape measure protein OS=Escherichia coli OX=562 GN=DLW88_24855 PE=4 SV=1	FALSE	1.527	1	1	1	1	931	98.9	9.88	1.81	1	1
High	Master Protein	A0A4T4SWK5	Uncharacterized protein OS=Escherichia coli OX=562 GN=BvCmsOUP014_04694 PE=4 SV=1	FALSE	1.513	13	1	1	1	103	12	4.2	0	1	1
High	Master Protein	Q0TAX9	Bifunctional protein GlmU OS=Escherichia coli O6:K15:H31 (strain 536 / UPEC) OX=362663 GN=glmU PE=3 SV=1	FALSE	1.511	2	1	1	1	456	49.1	6.48	1.61	1	1
High	Master Protein	A0A3K3SU85	Copper-translocating P-type ATPase OS=Escherichia coli OX=562 GN=D9I97_23710 PE=3 SV=1	FALSE	1.506	1	1	1	1	831	87.7	5.38	1.69	1	1
High	Master Protein	A0A3L4JPJ7	Phage portal protein OS=Escherichia coli OX=562 GN=D4023_08835 PE=4 SV=1	FALSE	1.486	2	1	1	1	523	58.2	7.23	0	1	1
High	Master Protein	A0A6C8HAD4	Cytochrome c family protein OS=Escherichia coli P0299917.1 OX=1116047 GN=ECP02999171_4596 PE=4 SV=1	FALSE	1.485	2	1	1	1	465	51.5	6.18	0	1	1
High	Master Protein	A0A029HFM0	Sec-independent protein translocase protein TatB OS=Escherichia coli 2-005-03_S4_C3 OX=1444258 GN=tatB PE=3 SV=1	FALSE	1.48	7	1	1	1	171	18.5	5.22	0	1	1
High	Master Protein	A0A234Y5G1	Protein YaiA OS=Escherichia coli OX=562 GN=yaiA PE=4 SV=1	FALSE	1.468	14	1	1	1	63	7.3	5.41	0	1	1
High	Master Protein	A0A0H3EXE8	Putative small terminase subunit OS=Escherichia coli (strain ATCC 9637 / CCM 2024 / DSM 1116 / LMG 11080 / NBRC 13500 / NCIMB 8666 / NRRL B-766 / W) OX=566546 GN=gpM2 PE=4 SV=1	FALSE	1.451	8	1	1	1	247	27.4	10.05	0	1	1
High	Master Protein	A0A0S3PN13	UmuC OS=Escherichia coli O169:H41 OX=1446701 GN=umuC PE=3 SV=1	FALSE	1.45	2	1	1	1	424	47.6	8.41	2.3	1	1
High	Master Protein	A0A5F1DT62	Uncharacterized protein OS=Escherichia coli OX=562 GN=CQB02_12080 PE=4 SV=1	FALSE	1.446	7	1	1	1	133	15	6.62	2.24	1	1
High	Master Protein	A0A1X3IYW4	Uncharacterized protein OS=Escherichia coli TA447 OX=656447 GN=ECXG_00183 PE=4 SV=1	FALSE	1.443	4	1	1	1	178	20.4	7.44	0	1	1
High	Master Protein	A0A6S4W5R1	dTDP-4-dehydrorhamnose 3,5-epimerase OS=Escherichia coli OX=562 GN=WP2S18E08_18620 PE=3 SV=1	FALSE	1.436	14	1	1	1	184	20.7	5.57	0	1	1
High	Master Protein	A0A4C4KWC3	EIII-Fru OS=Escherichia coli OX=562 GN=fruB PE=4 SV=1	FALSE	1.417	3	1	1	1	376	39.5	4.94	2.07	1	1
High	Master Protein	A0A4T2NJV5	Hydrolase OS=Escherichia coli OX=562 GN=EYY34_06295 PE=4 SV=1	FALSE	1.415	5	1	1	1	191	20.7	5.57	0	1	1
High	Master Protein	A0A7D4QZN0	GTP cyclohydrolase 1 OS=Escherichia coli OX=562 GN=folE PE=3 SV=1	FALSE	1.411	3	1	1	1	222	24.8	7.66	2.07	1	1
High	Master Protein	E1IXQ3	H-NS histone family protein OS=Escherichia coli MS 145-7 OX=679204 GN=HMPREF9348_05010 PE=3 SV=1	FALSE	1.41	7	1	2	1	151	17.3	5.25	0	1	1
High	Master Protein	A0A0A0FIE5	Putative lipoprotein YgdR OS=Escherichia coli G3/10 OX=1455601 GN=EL76_1005 PE=4 SV=1	FALSE	1.41	13	1	2	1	72	7.8	4.83	0	1	1
High	Master Protein	D8AFF8	Uncharacterized protein (Fragment) OS=Escherichia coli (strain MS 21-1) OX=749527 GN=HMPREF9530_05321 PE=4 SV=1	FALSE	1.401	8	1	1	1	157	16.4	9.44	0	1	1
High	Master Protein	A0A6C9G536	F0F1 ATP synthase subunit alpha (Fragment) OS=Escherichia coli OX=562 GN=GKG12_26605 PE=3 SV=1	FALSE	1.399	5	1	1	1	199	21.6	5.19	2.33	1	1
High	Master Protein	A0A5N9YAM1	Type I glyceraldehyde-3-phosphate dehydrogenase (Fragment) OS=Escherichia coli OX=562 GN=EI032_27100 PE=4 SV=1	FALSE	1.374	6	1	1	1	126	13.3	4.88	2.45	1	1
High	Master Protein	F4SGG0	Uncharacterized protein OS=Escherichia coli H736 OX=656414 GN=ECHG_00962 PE=4 SV=1	FALSE	1.368	6	1	1	1	122	13.3	6.52	2	1	1
High	Master Protein	A0A4D4ELT1	sn-glycerol-3-phosphate ABC transporter periplasmic binding protein OS=Escherichia coli OX=562 GN=ugpB PE=3 SV=1	FALSE	1.358	2	1	2	1	438	48.4	7.44	1.92	1	1
High	Master Protein	A0A3T8JPP7	Hemin ABC transporter substrate-binding protein OS=Escherichia coli OX=562 GN=DM962_04325 PE=4 SV=1	FALSE	1.345	5	1	1	1	330	36	9.45	0	1	1
High	Master Protein	A0A3Q0MYR4	Oxidoreductase OS=Escherichia coli OX=562 GN=CR539_12755 PE=4 SV=1	FALSE	1.34	4	1	1	1	346	38.2	5.92	0	1	1
High	Master Protein	E9XPU5	S-(hydroxymethyl)glutathione dehydrogenase OS=Escherichia coli TW10509 OX=656449 GN=ERFG_03092 PE=3 SV=1	FALSE	1.336	2	1	1	1	369	39.3	6.15	2.1	1	1
High	Master Protein	A0A3A6RTB7	Glucans biosynthesis glucosyltransferase H OS=Escherichia coli OX=562 GN=mdoH PE=3 SV=1	FALSE	1.335	2	1	1	1	847	96.9	8.66	1.9	1	1
High	Master Protein	A0A6M0Q1N9	DUF3828 domain-containing protein OS=Escherichia coli OX=562 GN=G4V03_20740 PE=4 SV=1	FALSE	1.329	11	1	1	1	150	17	5.02	0	1	1
High	Master Protein	D8E2R0	Phosphoenolpyruvate-protein phosphotransferase OS=Escherichia coli MS 119-7 OX=679206 GN=ptsP PE=3 SV=1	FALSE	1.314	2	1	1	1	575	63.4	4.88	0	1	1
High	Master Protein	A0A6C9RCS4	WG repeat-containing protein OS=Escherichia coli OX=562 GN=GKE58_27200 PE=4 SV=1	FALSE	1.306	2	1	2	1	629	72.1	5.74	2.01	1	1
High	Master Protein	A0A426P3H4	Peptidase S74 domain-containing protein OS=Escherichia coli OX=562 GN=AWF59_000255 PE=4 SV=1	FALSE	1.305	3	1	1	1	901	98.4	5.52	0	1	1
High	Master Protein	D8AF64	Uncharacterized protein OS=Escherichia coli (strain MS 21-1) OX=749527 GN=HMPREF9530_05226 PE=4 SV=1	FALSE	1.296	10	1	1	1	86	9.6	9.2	1.76	1	1
High	Master Protein	A0A070V6E8	D-alanine--D-alanine ligase OS=Escherichia coli 2-177-06_S3_C2 OX=1444151 GN=ddlA PE=3 SV=1	FALSE	1.285	2	1	1	1	364	39.3	5.19	1.75	1	1
High	Master Protein	A0A7M3J3S4	Phosphopentomutase OS=Escherichia coli OX=562 GN=E5S34_23140 PE=3 SV=1	FALSE	1.282	20	1	1	1	61	6.8	6.93	0	1	1
High	Master Protein	A0A4D3RVI1	Transcriptional regulator OS=Escherichia coli OX=562 GN=BvCmsSIP024_03470 PE=4 SV=1	FALSE	1.282	4	1	1	1	271	31	7.11	0	1	1
High	Master Protein	A0A4V4XNU2	Membrane-anchored diguanylate cyclase OS=Escherichia coli OX=562 GN=yfiN PE=4 SV=1	FALSE	1.267	2	1	1	1	407	45.6	8.09	1.76	1	1
High	Master Protein	sp	CAS2_BOVIN	TRUE	1.256	3	1	2	1	222	26	8.43	3.71	1	1
High	Master Protein	A0A6C9KRG7	Uncharacterized protein OS=Escherichia coli OX=562 GN=GKF20_07120 PE=4 SV=1	FALSE	1.248	9	1	1	1	93	11.2	9.85	0	1	1
High	Master Protein	A0A0K5TIX1	Integral membrane protein OS=Escherichia coli OX=562 GN=yagU_2 PE=4 SV=1	FALSE	1.239	13	1	1	1	83	9.2	8.6	0	1	1
High	Master Protein	J7R8S0	Uncharacterized protein OS=Escherichia coli OX=562 GN=yggL PE=4 SV=1	FALSE	1.236	8	1	1	1	118	14	4.91	0	1	1
High	Master Protein	A0A7A0R4C9	Major tail tube protein OS=Escherichia coli OX=562 GN=GIJ97_10520 PE=4 SV=1	FALSE	1.233	5	1	1	1	171	18.9	5.12	0	1	1
High	Master Protein	F4NFF3	Phenylalanine--tRNA ligase alpha subunit OS=Escherichia coli D9 OX=556266 GN=pheS PE=3 SV=1	FALSE	1.218	2	1	1	1	331	37.3	6.47	0	1	1
High	Master Protein	A0A0K4YB11	Adenylosuccinate lyase OS=Escherichia coli OX=562 GN=purB PE=3 SV=1	FALSE	1.218	2	1	1	1	456	51.6	5.91	1.97	1	1
High	Master Protein	sp	REF_HEVBR	TRUE	1.216	8	1	1	1	138	14.7	5.19	0	1	1
High	Master Protein	A0A515RT36	Methyl-accepting chemotaxis protein OS=Escherichia coli OX=562 GN=CUB99_09565 PE=4 SV=1	FALSE	1.212	2	1	1	1	554	59.8	4.93	0	1	1
High	Master Protein	H4LKE0	Uncharacterized protein OS=Escherichia coli DEC2E OX=868142 GN=ECDEC2E_4863 PE=4 SV=1	FALSE	1.211	22	1	1	1	90	10.6	10.18	0	1	1
High	Master Protein	A0A0M1UIV6	Alpha-tubulin-specific protease OS=Escherichia coli OX=562 GN=espG PE=3 SV=1	FALSE	1.202	5	1	1	1	400	44.7	5.91	0	1	1
High	Master Protein	A0A4T9E7T9	Branched-chain-amino-acid aminotransferase OS=Escherichia coli OX=562 GN=ilvE PE=3 SV=1	FALSE	1.196	4	1	1	1	309	34	5.82	0	1	1
High	Master Protein	A0A6H3MLF9	Uncharacterized protein OS=Escherichia coli OX=562 GN=E5S56_18235 PE=4 SV=1	FALSE	1.195	18	1	1	1	90	10.9	6.15	0	1	1
High	Master Protein	A0A0A0F8E0	Uncharacterized protein OS=Escherichia coli G3/10 OX=1455601 GN=EL76_2974 PE=4 SV=1	FALSE	1.194	7	1	1	1	82	9.3	8.19	2.02	1	1
High	Master Protein	A0A0H3PSM7	TonB-dependent outer membrane ferric coprogen receptor FitA OS=Escherichia coli O157:H7 (strain EC869) OX=478008 GN=fitA PE=3 SV=1	FALSE	1.191	2	1	1	1	713	78.5	5.31	1.65	1	1
High	Master Protein	A0A7H0XB31	Terminase OS=Escherichia coli phage vB_EcoM_Shy OX=2769805 GN=Shy_0050 PE=4 SV=1	FALSE	1.179	1	1	1	1	533	60.1	6.21	1.73	1	1
High	Master Protein	A0A3W3CXW7	Phage tail protein (Fragment) OS=Escherichia coli OX=562 GN=EAM59_25830 PE=4 SV=1	FALSE	1.174	5	1	1	1	266	26	4.92	2.25	1	1
High	Master Protein	A0A271UJ69	Spermidine/putrescine import ATP-binding protein PotA OS=Escherichia coli OX=562 GN=potA PE=3 SV=1	FALSE	1.166	5	1	1	1	378	43	5.24	0	1	1
High	Master Protein	A0A6D0ZTQ9	ATP-binding protein (Fragment) OS=Escherichia coli OX=562 GN=G3565_31770 PE=4 SV=1	FALSE	1.162	14	1	1	1	102	11.7	8.38	0	1	1
High	Master Protein	A0A426PPJ3	Glucose-6-phosphate 1-dehydrogenase OS=Escherichia coli OX=562 GN=zwf PE=3 SV=1	FALSE	1.16	2	1	1	1	491	55.7	5.88	1.65	1	1
High	Master Protein	A0A4S1W898	NADPH-dependent 7-cyano-7-deazaguanine reductase OS=Escherichia coli OX=562 GN=queF PE=3 SV=1	FALSE	1.154	4	1	1	1	282	32.6	6.13	0	1	1
High	Master Protein	A0A4Q0F593	Monomeric porin OmpG OS=Escherichia coli OX=562 GN=EPT01_20530 PE=4 SV=1	FALSE	1.154	3	1	1	1	301	34.9	4.61	2.49	1	1
High	Master Protein	A0A6L6S1Q4	Uncharacterized protein OS=Escherichia coli OX=562 GN=GNZ05_06480 PE=4 SV=1	FALSE	1.146	5	1	1	1	172	20.3	4.83	1.69	1	1
High	Master Protein	A0A1X3LHC5	Fimbrial domain-containing protein OS=Escherichia coli TA054 OX=656433 GN=EAXG_00337 PE=4 SV=1	FALSE	1.136	4	1	1	1	356	37.6	4.63	0	1	1
High	Master Protein	A0A478FYJ0	IS91 transposase OS=Escherichia coli OX=562 GN=BvCms12BK_00843 PE=4 SV=1	FALSE	1.129	9	1	1	1	81	9.3	9.39	2.41	1	1
High	Master Protein	A0A0C5F8A2	DNA-invertase bin3 OS=Escherichia coli OX=562 GN=bin3 PE=4 SV=1	FALSE	1.129	3	1	1	1	220	25.3	9.47	1.78	1	1
High	Master Protein	A0A3L0Y8Y9	AI-2E family transporter OS=Escherichia coli OX=562 GN=D9F05_05005 PE=3 SV=1	FALSE	1.125	2	1	1	1	356	39.2	9.11	1.77	1	1
High	Master Protein	A0A271UPS0	Ferredoxin-like protein OS=Escherichia coli OX=562 GN=BIU72_01030 PE=3 SV=1	FALSE	1.12	12	1	1	1	97	10.7	6.11	1.75	1	1
High	Master Protein	A0A769KKD1	Acyl-coenzyme A dehydrogenase OS=Escherichia coli OX=562 GN=fadE PE=3 SV=1	FALSE	1.117	3	1	1	1	814	89.2	8.09	0	1	1
High	Master Protein	A0A0F3VHT6	AAA family ATPase OS=Escherichia coli OX=562 GN=DIV22_06870 PE=4 SV=1	FALSE	1.115	2	1	1	1	401	45	6.19	2.3	1	1
High	Master Protein	A0A2R4AB48	Uncharacterized protein OS=Escherichia coli OX=562 GN=CCZ17_25060 PE=4 SV=1	FALSE	1.107	5	1	2	1	131	15.6	9.79	4.1	1	1
High	Master Protein	A0A1X3KRE4	Ribosomal-protein-alanine acetyltransferase OS=Escherichia coli H605 OX=656410 GN=EATG_00834 PE=4 SV=1	FALSE	1.105	5	1	1	1	194	22.7	9.14	0	1	1
High	Master Protein	A0A1X3KRQ3	tRNA-specific 2-thiouridylase MnmA OS=Escherichia coli H605 OX=656410 GN=mnmA PE=3 SV=1	FALSE	1.105	3	1	1	1	383	42.6	5.03	0	1	1
High	Master Protein	A0A4D3PZ60	3-hydroxyisobutyrate dehydrogenase GhbD OS=Escherichia coli OX=562 GN=ghbD PE=4 SV=1	FALSE	1.103	4	1	1	1	295	31.5	6.27	0	1	1

## Sheet: Table S2
Protein FDR Confidence: Combined	Master	Accession	Description	Contaminant	Sum PEP Score	Coverage [%]	# Peptides	# PSMs	# Unique Peptides	# AAs	MW [kDa]	calc. pI	Score Sequest HT: Sequest HT	# Peptides (by Search Engine): Sequest HT	# Protein Groups
High	Master Protein	WP_073927806.1	autotransporter adhesin Ag43 [Escherichia coli]	FALSE	362.59	43	25	89	2	1039	106.5	5.87	255.3	25	1	60 62
High	Master Protein	A0A7D7XSY4	Autotransporter adhesin Ag43 OS=Escherichia coli OX=562 GN=ag43 PE=4 SV=1	FALSE	348.214	46	26	89	3	1039	106.8	6.2	245.38	26	1
High	Master Protein	WP_024222486.1	autotransporter adhesin AIDA-I [Escherichia coli]	FALSE	345.871	28	21	103	21	1286	132.1	6.04	274.26	21	1
High	Master Protein	A0A478L7M3	Outer membrane porin OmpC OS=Escherichia coli OX=562 GN=ompC PE=3 SV=1	FALSE	325.267	86	22	171	0	363	40.1	4.78	389.66	22	1
High	Master Protein	WP_000969393.1	peptidylprolyl isomerase [Escherichia coli]	FALSE	321.683	63	30	84	30	623	68.1	5.07	204.9	30	1
High	Master Protein	C3TPR4	Periplasmic serine endoprotease DegP-like OS=Escherichia coli OX=562 GN=degP PE=3 SV=1	FALSE	295.53	67	22	73	1	474	49.3	8.56	188.12	22	1
High	Master Protein	lcl	[locus_tag=EDL933_3381] [protein=Outer membrane protein C precursor] [protein_id=AIG69547.1] [location=complement(3132952..3134055)] [gbkey=CDS]	FALSE	295.332	80	20	143	1	367	40.5	4.78	333.5	20	1
High	Master Protein	WP_000753945.1	MULTISPECIES: serine endoprotease DegP [Enterobacteriaceae]	FALSE	293.025	71	23	73	1	474	49.3	8.56	178.75	23	1
High	Master Protein	A0A6N4NSW3	Periplasmic serine endoprotease DegP-like OS=Escherichia coli OX=562 GN=degP PE=3 SV=1	FALSE	285.344	68	22	69	1	474	49.4	8.76	170.68	22	1
High	Master Protein	F4NDT5	Outer membrane protein N OS=Escherichia coli D9 OX=556266 GN=ompN PE=3 SV=1	FALSE	278.258	75	20	147	1	367	40.4	4.82	322.9	20	1
High	Master Protein	A0A0A0F4K3	Periplasmic serine endoprotease DegP-like OS=Escherichia coli G3/10 OX=1455601 GN=EL76_3864 PE=3 SV=1	FALSE	270.79	69	22	70	1	474	49.3	8.28	168.5	22	1
High	Master Protein	A0A5E9SB53	L-asparaginase 2 (Fragment) OS=Escherichia coli OX=562 GN=ansB PE=3 SV=1	FALSE	262.712	65	14	73	2	326	34.6	6.38	182.65	14	1
High	Master Protein	A0A2Y0I8K0	Outer membrane protein A OS=Escherichia coli OX=562 GN=ompA PE=3 SV=1	FALSE	252.396	61	15	195	1	346	37.2	6.7	387.38	15	1
High	Master Protein	A0A2Y0TBT9	Maltodextrin-binding protein OS=Escherichia coli OX=562 GN=malE PE=3 SV=1	FALSE	238.311	72	23	71	11	396	43.4	5.71	157	23	1
High	Master Protein	A0A641H1Q8	Amino acid ABC transporter substrate-binding protein OS=Escherichia coli OX=562 GN=glnH PE=4 SV=1	FALSE	237.082	72	19	111	2	248	27.2	8.51	268.21	19	1
High	Master Protein	D7ZI93	Outer membrane protein assembly factor BamC OS=Escherichia coli MS 69-1 OX=749531 GN=bamC PE=3 SV=1	FALSE	236.244	82	17	65	6	344	36.8	5.57	191.12	17	1
High	Master Protein	A0A6D0U3E7	Outer membrane protein A OS=Escherichia coli OX=562 GN=ompA PE=3 SV=1	FALSE	232.418	57	14	168	1	350	37.4	5.57	350.76	14	1
High	Master Protein	B7MU30	Oligopeptide transporter subunit periplasmic-binding component of ABC superfamily OS=Escherichia coli O81 (strain ED1a) OX=585397 GN=oppA PE=3 SV=1	FALSE	230.076	55	21	65	21	543	61	6.37	171.56	21	1
High	Master Protein	J7QY25	UDP-sugar hydrolase (5'-nucleotidase) (Fragment) OS=Escherichia coli OX=562 GN=ushA PE=3 SV=1	FALSE	229.189	66	23	53	23	541	59.8	5.54	141.1	23	1
High	Master Protein	A0A7B4KCG4	Chaperone protein DnaK OS=Escherichia coli OX=562 GN=dnaK PE=2 SV=1	FALSE	228.992	60	25	44	25	638	69.1	4.97	122.18	25	1
High	Master Protein	A0A1X3KW01	Vitamin B12 transporter BtuB OS=Escherichia coli H420 OX=656400 GN=btuB PE=3 SV=1	FALSE	223.42	53	21	45	21	628	69.9	5.67	120.35	21	1
High	Master Protein	A0A7U9M2B0	Periplasmic L-asparaginase 2 OS=Escherichia coli O145:H28 OX=1078034 GN=ansB PE=4 SV=1	FALSE	222.814	54	13	69	1	348	36.8	6.38	159.87	13	1
High	Master Protein	A0A3W2Y9Z8	Amino acid ABC transporter substrate-binding protein OS=Escherichia coli OX=562 GN=D6X76_10810 PE=4 SV=1	FALSE	222.391	52	13	73	1	302	33.4	8.53	179.54	13	1
High	Master Protein	A0A4S1R6F7	Glutamate/aspartate ABC transporter substrate-binding protein GltI OS=Escherichia coli OX=562 GN=gltI PE=4 SV=1	FALSE	221.417	56	13	73	1	302	33.3	8.53	177.75	13	1
High	Master Protein	A0A4Q0DK67	L-asparaginase 2 (Fragment) OS=Escherichia coli OX=562 GN=ansB PE=3 SV=1	FALSE	215.517	67	13	70	1	273	29.3	5.99	159.95	13	1
High	Master Protein	A0A3R0IHS0	DUF945 domain-containing protein OS=Escherichia coli O26 OX=404399 GN=CW396_07065 PE=4 SV=1	FALSE	207.212	58	22	52	22	502	54.7	5.17	120.72	22	1
High	Master Protein	E9XIS7	Extracellular solute-binding protein 3 OS=Escherichia coli TW10509 OX=656449 GN=ERFG_01421 PE=3 SV=1	FALSE	205.957	67	20	74	20	266	29	6.64	164.9	20	1
High	Master Protein	A0A1X3KKB8	Thiosulfate-binding protein OS=Escherichia coli H605 OX=656410 GN=EATG_02553 PE=3 SV=1	FALSE	202.379	63	20	63	13	338	37.6	8.15	150.59	20	1
High	Master Protein	A0A5N2LAM1	Elongation factor Ts OS=Escherichia coli OX=562 GN=tsf PE=3 SV=1	FALSE	199.605	74	19	55	1	283	30.4	5.29	126.05	19	1
High	Master Protein	A0A0K9T8Z5	Putrescine-binding periplasmic protein OS=Escherichia coli M114 OX=656416 GN=ERYG_03875 PE=3 SV=1	FALSE	198.336	63	17	58	17	348	38.8	5.39	138.65	17	1
High	Master Protein	A0A3Z4KHQ7	60 kDa chaperonin OS=Escherichia coli OX=562 GN=groL PE=3 SV=1	FALSE	196.826	53	21	57	21	548	57.3	4.94	127.43	21	1
High	Master Protein	A0A6G6KVW9	Enolase OS=Escherichia coli OX=562 GN=eno PE=3 SV=1	FALSE	193.499	63	17	38	17	432	45.7	5.4	114.74	17	1
High	Master Protein	A0A6N9S2P9	Elongation factor Ts OS=Escherichia coli OX=562 GN=tsf PE=3 SV=1	FALSE	190.914	73	19	52	1	283	30.4	5.29	120.66	19	1
High	Master Protein	A0A2W6NZV0	Phosphoglycerate kinase OS=Escherichia coli OX=562 GN=pgk PE=3 SV=1	FALSE	189.676	66	17	38	17	382	40.5	5.29	95.37	17	1
High	Master Protein	A0A163CXN4	ATP synthase subunit beta OS=Escherichia coli OX=562 GN=atpD PE=3 SV=1	FALSE	185.218	58	18	37	18	460	50.3	5.01	107.23	18	1
High	Master Protein	A0A6M1ITU6	Arginine ABC transporter substrate-binding protein OS=Escherichia coli OX=562 GN=artJ PE=3 SV=1	FALSE	183.439	77	15	68	11	243	26.9	6.6	159.64	15	1
High	Master Protein	A0A426PLI7	LPS-assembly protein LptD OS=Escherichia coli OX=562 GN=lptD PE=3 SV=1	FALSE	182.778	49	27	45	27	784	89.6	5.35	98.69	27	1
High	Master Protein	A0A1V3VXM4	Tol-Pal system protein TolB OS=Escherichia coli OX=562 GN=tolB PE=3 SV=1	FALSE	177.831	53	14	43	14	430	45.9	7.59	121.81	14	1
High	Master Protein	A0A1X3IEA9	Thiol:disulfide interchange protein DsbA OS=Escherichia coli E1114 OX=550691 GN=EADG_04238 PE=3 SV=1	FALSE	177.717	81	10	88	1	150	16.6	7.39	195.21	10	1
High	Master Protein	A0A4C9BVH3	D-ribose transporter subunit RbsB OS=Escherichia coli OX=562 GN=rbsB_1 PE=4 SV=1	FALSE	176.51	63	13	46	13	296	30.9	7.47	107.24	13	1
High	Master Protein	A0A1X3JKA5	Peptidoglycan-associated protein OS=Escherichia coli H386 OX=656397 GN=pal PE=3 SV=1	FALSE	176.108	65	7	50	7	181	19.7	6.8	114.58	7	1
High	Master Protein	D3QUE6	Acid stress chaperone HdeB OS=Escherichia coli O55:H7 (strain CB9615 / EPEC) OX=701177 GN=hdeB PE=3 SV=1	FALSE	174.901	61	6	286	3	112	12.5	7.12	703.2	6	1
High	Master Protein	A0A0H2UL03	Thiol:disulfide interchange protein OS=Escherichia coli (strain B / BL21-DE3) OX=469008 PE=1 SV=1	FALSE	173.751	64	10	87	1	189	21.1	5.63	191.81	10	1
High	Master Protein	A0A2W6P0D8	Glutamine ABC transporter substrate-binding protein GlnH (Fragment) OS=Escherichia coli OX=562 GN=DNQ45_27055 PE=4 SV=1	FALSE	171.725	79	16	109	2	175	19.2	8.91	250.54	16	1
High	Master Protein	A0A444R4Y5	Molecular chaperone OsmY (Fragment) OS=Escherichia coli OX=562 GN=osmY PE=4 SV=1	FALSE	169.522	75	11	215	1	173	18.2	5.67	556.31	11	1
High	Master Protein	A0A026UY06	2',3'-cyclic-nucleotide 2'-phosphodiesterase/3'-nucleotidase OS=Escherichia coli O174:H8 str. 04-3038 OX=1446704 GN=cpdB PE=3 SV=1	FALSE	169.309	51	22	41	22	647	70.8	5.73	99.06	22	1
High	Master Protein	P76177	Protein YdgH OS=Escherichia coli (strain K12) OX=83333 GN=ydgH PE=1 SV=1	FALSE	168.037	64	18	67	18	314	33.9	9.28	128.17	18	1
High	Master Protein	A0A4Q0BVV2	ATP synthase subunit alpha OS=Escherichia coli OX=562 GN=atpA PE=3 SV=1	FALSE	164.635	50	20	44	12	513	55.2	6.13	96.34	20	1
High	Master Protein	A0A0J2E7C3	Elongation factor G OS=Escherichia coli OX=562 GN=fusA PE=3 SV=1	FALSE	164.382	42	21	36	21	704	77.5	5.38	86.6	21	1
High	Master Protein	A0A3T9E4X1	Outer membrane protein assembly factor BamA OS=Escherichia coli OX=562 GN=bamA PE=3 SV=1	FALSE	162.29	40	23	43	23	810	90.5	5.12	96.72	23	1
High	Master Protein	A0A5D8M8W6	Omptin family outer membrane protease OmpP OS=Escherichia coli OX=562 GN=ompP PE=3 SV=1	FALSE	161.21	58	15	79	12	315	35.5	7.46	176.7	15	1
High	Master Protein	A0A2W6Q9I3	Maltodextrin-binding protein (Fragment) OS=Escherichia coli OX=562 GN=DNQ45_09415 PE=3 SV=1	FALSE	160.078	72	13	51	1	242	26.4	5.24	106.9	13	1
High	Master Protein	WP_001339235.1	nucleoside-specific channel-forming protein Tsx [Escherichia coli]	FALSE	154.682	49	8	37	8	292	33.4	5.33	111.05	8	1
High	Master Protein	E2QMK5	Membrane protein OS=Escherichia coli OX=562 GN=slyB PE=4 SV=1	FALSE	154.597	48	6	104	6	155	15.6	8.84	274.95	6	1
High	Master Protein	A0A3Z7VG60	Attaching and effacing protein OS=Escherichia coli OX=562 GN=eae PE=3 SV=1	FALSE	152.209	25	18	35	18	939	101.6	8.92	86.32	18	1
High	Master Protein	A0A210GCF7	Phosphate-binding protein PstS OS=Escherichia coli OX=562 GN=pstS PE=3 SV=1	FALSE	147.241	64	18	43	18	346	37	8.47	98.07	18	1
High	Master Protein	A0A2A6QA66	Chaperone SurA OS=Escherichia coli OX=562 GN=surA PE=3 SV=1	FALSE	147.205	50	17	33	17	428	47.3	6.98	82.44	17	1
High	Master Protein	A0A1X3KTM1	Osmotically-inducible protein Y OS=Escherichia coli H605 OX=656410 GN=EATG_03274 PE=4 SV=1	FALSE	145.974	51	10	191	1	227	24.1	8.46	526.69	10	1
High	Master Protein	A0A7Z2UDT0	Multidrug efflux RND transporter periplasmic adaptor subunit AcrA OS=Escherichia coli OX=562 GN=acrA PE=4 SV=1	FALSE	143.341	55	16	42	16	397	42.2	8	104.65	16	1
High	Master Protein	A0A0K9TJ89	Autotransporter beta-domain-containing protein OS=Escherichia coli M114 OX=656416 GN=ERYG_00146 PE=4 SV=1	FALSE	142.83	22	10	35	1	703	72.8	5.9	103.66	10	1
High	Master Protein	E9XM72	Aldehyde-alcohol dehydrogenase OS=Escherichia coli TW10509 OX=656449 GN=ERFG_02192 PE=3 SV=1	FALSE	142.336	42	26	36	26	891	96.1	6.79	78.16	26	1
High	Master Protein	WP_000249151.1	penicillin-binding protein activator LpoA [Escherichia coli]	FALSE	141.229	42	21	41	21	678	72.8	5.52	85.36	21	1
High	Master Protein	V0SBN7	Arginine ABC transporter, periplasmic arginine-binding protein ArtJ OS=Escherichia coli 907672 OX=1268982 GN=HMPREF1595_03485 PE=3 SV=1	FALSE	141.11	68	12	31	1	260	28.7	8.44	62.23	12	1
High	Master Protein	A0A4D3MIT3	Cysteine synthase OS=Escherichia coli OX=562 GN=cysK PE=3 SV=1	FALSE	139.396	63	14	27	14	323	34.5	6.06	71.97	14	1
High	Master Protein	A0A1X3LKR2	MltA-interacting protein OS=Escherichia coli TA054 OX=656433 GN=EAXG_01298 PE=3 SV=1	FALSE	138.049	64	9	35	9	238	26.8	5.4	88.19	9	1
High	Master Protein	WP_001429211.1	glyceraldehyde-3-phosphate dehydrogenase [Escherichia coli]	FALSE	137.794	76	20	44	19	331	35.5	7.47	96.86	20	1
High	Master Protein	A0A454A8J3	Peptidyl-prolyl cis-trans isomerase OS=Escherichia coli O6:K15:H31 (strain 536 / UPEC) OX=362663 GN=ECP_3437 PE=3 SV=1	FALSE	137.542	58	13	52	13	270	28.9	8.47	131.3	13	1
High	Master Protein	A0A5F1DTR8	Outer membrane protein assembly factor BamC OS=Escherichia coli OX=562 GN=bamC PE=3 SV=1	FALSE	136.314	61	13	51	2	344	36.9	5.58	114.98	13	1
High	Master Protein	E9XKB2	Glutamate decarboxylase OS=Escherichia coli TW10509 OX=656449 GN=ERFG_01861 PE=3 SV=1	FALSE	136.082	52	15	37	1	466	52.7	5.49	72.72	15	1
High	Master Protein	A0A454A9S6	Thiol:disulfide interchange protein OS=Escherichia coli O6:K15:H31 (strain 536 / UPEC) OX=362663 GN=ECP_4070 PE=3 SV=1	FALSE	135.992	50	9	83	1	208	23.1	6.34	179.19	9	1
High	Master Protein	A0A271QQA2	C-lysozyme inhibitor OS=Escherichia coli OX=562 GN=ivy PE=3 SV=1	FALSE	135.103	69	7	65	5	157	16.9	6.77	156.75	7	1
High	Master Protein	A0A0D8WBA4	Arginine ABC transporter periplasmic binding protein OS=Escherichia coli OX=562 GN=artJ PE=3 SV=1	FALSE	134.836	72	12	28	1	243	26.9	7.36	54.55	12	1
High	Master Protein	A0A3L5K207	Zinc resistance-associated protein OS=Escherichia coli OX=562 GN=zraP PE=3 SV=1	FALSE	134.673	50	6	68	6	141	15.1	9.11	121.1	6	1
High	Master Protein	A0A6N0IKY2	Acid-activated periplasmic chaperone HdeB OS=Escherichia coli OX=562 GN=hdeB PE=4 SV=1	FALSE	134.264	50	4	198	1	96	10.6	5.1	525.24	4	1
High	Master Protein	A0A0K4XBA6	Thiol:disulfide interchange protein OS=Escherichia coli OX=562 GN=dsbA PE=3 SV=1	FALSE	134.077	55	9	80	1	208	23.1	6.79	170.76	9	1
High	Master Protein	D6I122	Outer membrane protein tolC OS=Escherichia coli B088 OX=550672 GN=ECCG_02407 PE=3 SV=1	FALSE	133.521	48	14	25	14	490	53.3	5.39	67.85	14	1
High	Master Protein	A0A5B1EZ50	Glutamate decarboxylase OS=Escherichia coli OX=562 GN=F1E19_10055 PE=3 SV=1	FALSE	132.768	52	15	35	1	466	52.6	5.34	69.82	15	1
High	Master Protein	A0A271R777	Porin OS=Escherichia coli OX=562 GN=ompC PE=3 SV=1	FALSE	132.703	46	13	86	1	364	40.2	4.7	165.5	13	1
High	Master Protein	A0A6G4BWX1	Ecotin OS=Escherichia coli OX=562 GN=eco PE=3 SV=1	FALSE	131.877	66	11	40	11	162	18.2	7.12	99.43	11	1
High	Master Protein	A0A444R1M7	L-asparaginase 2 (Fragment) OS=Escherichia coli OX=562 GN=ansB PE=4 SV=1	FALSE	130.624	67	8	43	1	152	16.3	8.81	100.13	8	1
High	Master Protein	A0A376Q3N1	DUF3313 domain-containing protein OS=Escherichia coli OX=562 GN=DL637_17630 PE=4 SV=1	FALSE	129.293	60	10	31	3	222	24.4	7.91	86.94	10	1
High	Master Protein	A0A5B1F7G2	OmpF protein OS=Escherichia coli OX=562 GN=ompF PE=3 SV=1	FALSE	127.362	54	15	40	14	362	39.3	4.96	83.4	15	1
High	Master Protein	A0A7U9BL63	Protein HdeA OS=Escherichia coli H299 OX=656393 GN=ECOG_03053 PE=4 SV=1	FALSE	126.828	55	3	178	1	110	11.9	5.58	700.92	3	1
High	Master Protein	D3GTQ8	Thiol:disulfide interchange protein OS=Escherichia coli O44:H18 (strain 042 / EAEC) OX=216592 GN=dsbC PE=3 SV=1	FALSE	123.674	70	11	40	11	236	25.6	6.79	81.09	11	1
High	Master Protein	A0A2X5FFN5	Omptin family outer membrane protease OmpT OS=Escherichia coli OX=562 GN=ompT PE=3 SV=1	FALSE	123.643	59	17	37	15	317	35.6	5.78	70.99	17	1
High	Master Protein	A0A5E9SZD2	Molecular chaperone OsmY OS=Escherichia coli OX=562 GN=osmY PE=4 SV=1	FALSE	123.33	52	10	149	1	201	21.1	7.49	358.39	10	1
High	Master Protein	WP_000124431.1	ferrichrome porin FhuA [Escherichia coli]	FALSE	122.962	47	24	30	24	747	82.1	5.69	65.81	24	1
High	Master Protein	A0A4D0S8T3	Maltoporin OS=Escherichia coli OX=562 GN=lamB PE=2 SV=1	FALSE	122.961	50	14	26	14	446	50	5.03	73.69	14	1
High	Master Protein	A0A1L4J2J5	Uncharacterized protein OS=Escherichia coli OX=562 GN=RG28_22270 PE=4 SV=1	FALSE	121.641	68	7	80	7	146	16.6	10.89	164.28	7	1
High	Master Protein	A0A193LUQ4	Histidine ABC transporter substrate-binding protein HisJ OS=Escherichia coli OX=562 GN=GJ11_15480 PE=3 SV=1	FALSE	120.674	57	12	25	8	260	28.5	5.44	68.86	12	1
High	Master Protein	A0A193LMB8	Chaperone protein Skp OS=Escherichia coli OX=562 GN=GJ11_00930 PE=3 SV=1	FALSE	120.362	48	6	71	2	161	17.7	9.7	179.59	6	1
High	Master Protein	A0A377LAN5	Peptidyl-prolyl cis-trans isomerase OS=Escherichia coli OX=562 GN=ppiA PE=3 SV=1	FALSE	119.722	55	7	29	1	186	20.1	8.85	90.59	7	1
High	Master Protein	M9GVE7	Inner membrane lipoprotein yiaD OS=Escherichia coli MP021561.2 OX=1116136 GN=yiaD PE=4 SV=1	FALSE	115.683	65	7	17	7	219	22.1	9.7	61.34	7	1
High	Master Protein	K4Y655	Outer membrane porin protein (Fragment) OS=Escherichia coli O111:H11 str. CVM9455 OX=1165939 GN=ECO9455_10239 PE=3 SV=1	FALSE	115.358	51	9	23	2	323	35.6	4.77	69.78	9	1
High	Master Protein	A0A073FNM8	Multidrug resistance protein mdtE OS=Escherichia coli 2-427-07_S4_C3 OX=1444266 GN=mdtE PE=3 SV=1	FALSE	114.633	62	16	34	1	318	34	5.83	75.27	16	1
High	Master Protein	A0A6C9BYI4	Multidrug transporter subunit MdtE OS=Escherichia coli OX=562 GN=mdtE PE=3 SV=1	FALSE	114.063	55	16	34	1	385	41.2	5.91	70.62	16	1
High	Master Protein	WP_024236553.1	thiosulfate sulfurtransferase YnjE [Escherichia coli]	FALSE	112.717	34	12	31	3	435	48.2	6.54	69.43	12	1
High	Master Protein	A0A777PSC9	Peptidyl-prolyl cis-trans isomerase (Fragment) OS=Escherichia coli OX=562 GN=GF208_03355 PE=3 SV=1	FALSE	112.213	59	7	28	1	186	20	8.37	81.6	7	1
High	Master Protein	A0A4S1UEN8	Outer membrane protein X OS=Escherichia coli OX=562 GN=ompX PE=3 SV=1	FALSE	111.981	54	9	43	8	171	18.6	8.03	91.37	9	1
High	Master Protein	E9TGW6	Phospholipid-binding domain protein OS=Escherichia coli MS 117-3 OX=749539 GN=HMPREF9542_03043 PE=4 SV=1	FALSE	111.483	65	10	33	10	191	20	8.98	81.36	10	1
High	Master Protein	A0A0A0HEI6	Acid stress chaperone HdeA OS=Escherichia coli OX=562 GN=hdeA PE=3 SV=1	FALSE	110.975	59	3	119	1	110	11.8	5.55	498.25	3	1
High	Master Protein	WP_000113001.1	molybdate ABC transporter substrate-binding protein [Escherichia coli]	FALSE	110.84	67	14	36	14	257	27.5	6.81	69.64	14	1
High	Master Protein	WP_024222504.1	F41 fimbrial protein [Escherichia coli]	FALSE	110.05	40	5	16	5	277	29	4.84	53.74	5	1
High	Master Protein	A0A222QJ83	Glucose-1-phosphatase/inositol phosphatase OS=Escherichia coli NCCP15648 OX=1200752 GN=A610_1090 PE=4 SV=1	FALSE	108.399	49	14	29	1	413	45.6	5.9	72.71	14	1
High	Master Protein	A0A6G3HLF7	Formate C-acetyltransferase OS=Escherichia coli OX=562 GN=pflB PE=3 SV=1	FALSE	106.713	29	16	30	16	760	85.3	6.01	66.51	16	1
High	Master Protein	D7XUT8	Periplasmic trehalase OS=Escherichia coli MS 84-1 OX=749533 GN=treA PE=3 SV=1	FALSE	106.686	41	14	23	14	554	62.4	5.58	54.39	14	1
High	Master Protein	A0A4D1UH09	Outer membrane porin protein OS=Escherichia coli OX=562 GN=BvCmsNSP047_04924 PE=3 SV=1	FALSE	106.528	39	8	22	1	360	39.6	4.83	65.57	8	1
High	Master Protein	WP_001192991.1	fumarate reductase (quinol) flavoprotein subunit [Escherichia coli]	FALSE	105.705	39	18	28	18	602	65.9	6.28	61.98	18	1
High	Master Protein	A0A3Z1IQT5	Acid stress chaperone HdeA OS=Escherichia coli OX=562 GN=hdeA PE=3 SV=1	FALSE	105.451	59	3	115	1	110	11.9	5.25	497.98	3	1
High	Master Protein	A0A070T798	Putative phospholipid-binding protein mlaC OS=Escherichia coli 2-210-07_S3_C3 OX=1444180 GN=AC45_0312 PE=4 SV=1	FALSE	105.291	58	9	42	9	211	23.9	9.45	87.07	9	1
High	Master Protein	A0A222QIE5	DUF940 domain containing protein OS=Escherichia coli NCCP15648 OX=1200752 GN=A610_1073 PE=4 SV=1	FALSE	105.223	37	18	28	18	698	78.7	6.18	67.06	18	1
High	Master Protein	A0A6M0PKD9	Outer membrane protein A OS=Escherichia coli OX=562 GN=ompA PE=3 SV=1	FALSE	105.097	24	9	126	1	353	37.8	6.25	219.55	9	1
High	Master Protein	A0A6D0R0F3	Uroporphyrinogen-III C-methyltransferase OS=Escherichia coli OX=562 GN=hemX PE=4 SV=1	FALSE	104.653	51	14	23	4	393	43	4.75	54.2	14	1
High	Master Protein	A0A6C8HPX9	Uncharacterized protein OS=Escherichia coli P0299917.1 OX=1116047 GN=ECP02999171_0686 PE=4 SV=1	FALSE	104.295	57	5	22	5	185	18.8	8.13	72.14	5	1
High	Master Protein	A0A0Q3B606	Superoxide dismutase [Cu-Zn] OS=Escherichia coli OX=562 GN=AM270_03715 PE=3 SV=1	FALSE	104.068	71	7	49	7	173	17.7	6.64	98.48	7	1
High	Master Protein	A0A1X3LZC1	Periplasmic beta-glucosidase (Gentiobiase)(Cellobiase) (Beta-D-glucoside glucohydrolase) OS=Escherichia coli TA249 OX=656441 GN=EAZG_02154 PE=3 SV=1	FALSE	100.931	33	20	31	20	765	83.5	6.1	65.43	20	1
High	Master Protein	A0A7U9FY43	Phospholipase A(1) OS=Escherichia coli TA143 OX=656437 GN=ECMG_04604 PE=4 SV=1	FALSE	100.065	51	11	20	11	289	33.1	5.33	55.89	11	1
High	Master Protein	A0A7J4WQ05	Osmotically-inducible lipoprotein OsmB OS=Escherichia coli OX=562 GN=osmB PE=4 SV=1	FALSE	99.417	58	2	8	2	72	6.9	9.74	49.15	2	1
High	Master Protein	A0A246P199	OB fold stress tolerance protein YgiW OS=Escherichia coli OX=562 GN=ygiW PE=4 SV=1	FALSE	97.651	49	10	123	2	130	14	5.26	220.29	10	1
High	Master Protein	A7ZMV3	C-terminal processing peptidase OS=Escherichia coli O139:H28 (strain E24377A / ETEC) OX=331111 GN=prc PE=3 SV=1	FALSE	97.212	30	19	32	19	682	76.5	7.09	74.97	19	1
High	Master Protein	F4V180	Outer-membrane lipoprotein LolB OS=Escherichia coli TA280 OX=656444 GN=lolB PE=3 SV=1	FALSE	97.137	67	11	30	11	207	23.6	9.04	60.25	11	1
High	Master Protein	WP_001307415.1	MULTISPECIES: malate dehydrogenase [Enterobacteriaceae]	FALSE	96.762	67	12	19	12	312	32.3	5.77	51.15	12	1
High	Master Protein	W8ZQR6	Penicillin-binding protein activator LpoB OS=Escherichia coli O25b:H4-ST131 OX=941322 GN=lpoB PE=3 SV=1	FALSE	96.281	40	6	31	6	214	22.7	6.93	70.97	6	1
High	Master Protein	A0A2A3W1N8	Bifunctional glucose-1-phosphatase/inositol phosphatase OS=Escherichia coli OX=562 GN=agp PE=4 SV=1	FALSE	95.348	48	14	25	1	413	45.6	5.9	66.65	14	1
High	Master Protein	A0A376Y640	Peptidyl-prolyl cis-trans isomerase OS=Escherichia coli OX=562 GN=ppiA_2 PE=3 SV=1	FALSE	94.873	64	6	21	1	121	13.3	9.04	66.32	6	1
High	Master Protein	A0A4C6J7Q0	Endolytic peptidoglycan transglycosylase RlpA OS=Escherichia coli OX=562 GN=rlpA PE=3 SV=1	FALSE	94.093	50	11	22	11	362	37.5	5.73	60.47	11	1
High	Master Protein	A0A4C3FYN3	Beta-barrel assembly-enhancing protease OS=Escherichia coli OX=562 GN=bepA PE=3 SV=1	FALSE	93.922	42	12	17	12	487	53.9	7.68	41.94	12	1
High	Master Protein	E1J5I6	DNA protection during starvation protein OS=Escherichia coli MS 124-1 OX=679205 GN=dps PE=3 SV=1	FALSE	93.781	50	8	26	8	208	23.2	6.05	51.96	8	1
High	Master Protein	A0A377CSY9	Nickel ABC transporter, nickel/metallophore periplasmic binding protein OS=Escherichia coli OX=562 GN=nikA PE=3 SV=1	FALSE	89.522	43	16	28	16	524	58.8	6.23	66.87	16	1
High	Master Protein	A0A3W4K7I4	GTP-binding protein (Fragment) OS=Escherichia coli OX=562 GN=EAX79_29040 PE=4 SV=1	FALSE	89.457	87	12	21	8	219	24.1	4.88	43.35	12	1
High	Master Protein	A0A3A6SG42	Acetate kinase OS=Escherichia coli OX=562 GN=ackA PE=3 SV=1	FALSE	88.129	40	10	16	10	400	43.3	6.28	42.22	10	1
High	Master Protein	A0A024L797	Thiol:disulfide interchange protein OS=Escherichia coli OX=562 GN=dsbA PE=3 SV=1	FALSE	87.378	49	8	47	1	208	23.1	6.79	101	8	1
High	Master Protein	A0A069XNY9	SmpA / OmlA family protein OS=Escherichia coli 3-373-03_S4_C2 OX=1444252 GN=AD17_2076 PE=4 SV=1	FALSE	87.048	69	5	57	1	108	11.5	7.24	127.54	5	1
High	Master Protein	WP_001287380.1	DNA-binding transcriptional regulator H-NS [Escherichia coli]	FALSE	86.422	55	8	26	8	137	15.5	5.47	63.19	8	1
High	Master Protein	A0A1X3I1D3	Glycine betaine-binding periplasmic protein OS=Escherichia coli M056 OX=656415 GN=EAMG_01047 PE=4 SV=1	FALSE	86.285	35	7	17	7	344	37.4	6.95	51.67	7	1
High	Master Protein	A0A7Z2UIH1	Outer membrane lipoprotein chaperone LolA OS=Escherichia coli OX=562 GN=lolA PE=4 SV=1	FALSE	86.256	53	8	29	1	203	22.5	6.8	73.46	8	1
High	Master Protein	A0A2W6PE79	Sulfate ABC transporter substrate-binding protein (Fragment) OS=Escherichia coli OX=562 GN=DNQ45_09535 PE=4 SV=1	FALSE	86.186	57	8	25	2	164	18	9.33	73.33	8	1
High	Master Protein	A0A3T4WJM0	High-affinity zinc uptake system protein ZnuA OS=Escherichia coli OX=562 GN=znuA PE=3 SV=1	FALSE	84.852	45	9	18	9	310	33.8	5.86	40.39	9	1
High	Master Protein	A0A5C9AKK2	DUF4156 domain-containing protein (Fragment) OS=Escherichia coli OX=562 GN=FWK02_20575 PE=4 SV=1	FALSE	84.55	80	3	17	3	93	9.5	5.17	46.59	3	1
High	Master Protein	A0A0A1A2T9	Glucans biosynthesis protein G OS=Escherichia coli OX=562 GN=mdoG PE=3 SV=1	FALSE	84.471	35	14	24	4	517	58.6	8.06	56.72	14	1
High	Master Protein	A0A0J2AZA5	Serine-type D-Ala-D-Ala carboxypeptidase OS=Escherichia coli OX=562 GN=dacC PE=3 SV=1	FALSE	84.449	34	11	28	4	400	43.7	7.43	57.12	11	1
High	Master Protein	A0A1X3L6L1	Thiol:disulfide interchange protein OS=Escherichia coli H420 OX=656400 GN=EAVG_03880 PE=3 SV=1	FALSE	84.38	46	9	22	9	268	29.7	8.25	53.04	9	1
High	Master Protein	E1J4G0	Pyruvate kinase OS=Escherichia coli MS 124-1 OX=679205 GN=pyk PE=3 SV=1	FALSE	83.924	38	16	20	16	542	58.7	7.11	49.03	16	1
High	Master Protein	A0A5F1DVS0	OB fold stress tolerance protein YgiW OS=Escherichia coli OX=562 GN=ygiW PE=4 SV=1	FALSE	82.456	49	9	103	1	130	14.1	5.26	190.06	9	1
High	Master Protein	A0A073FUZ6	YedD-like family protein OS=Escherichia coli 2-427-07_S4_C3 OX=1444266 GN=AD31_2260 PE=4 SV=1	FALSE	82.402	63	7	27	7	137	15	5.31	51.11	7	1
High	Master Protein	A0A2S8JRM8	DUF1795 domain-containing protein OS=Escherichia coli OX=562 GN=dcrB PE=4 SV=1	FALSE	82.229	65	8	23	8	185	19.8	5.33	46.02	8	1
High	Master Protein	A0A2S8JSC9	Superoxide dismutase OS=Escherichia coli OX=562 GN=sodB PE=3 SV=1	FALSE	81.943	63	8	19	8	193	21.3	5.95	45.89	8	1
High	Master Protein	A0A0K3JM78	Slp family outer membrane lipoprotein OS=Escherichia coli OX=562 GN=slp_1 PE=4 SV=1	FALSE	81.643	38	6	29	6	243	27.5	7.05	68	6	1
High	Master Protein	A0A0D8W5G8	Sulfurtransferase OS=Escherichia coli OX=562 GN=D9D31_03440 PE=4 SV=1	FALSE	80.459	25	10	29	1	435	48.3	6.81	58.6	10	1
High	Master Protein	A0A7I8Y789	30S ribosomal protein S1 OS=Escherichia coli OX=562 GN=rpsA PE=3 SV=1	FALSE	79.969	33	15	22	15	557	61	5	54.07	15	1
High	Master Protein	A0A6H3LCN7	Pectinesterase OS=Escherichia coli OX=562 GN=DEO20_09270 PE=4 SV=1	FALSE	79	34	9	18	9	427	46.1	6	42.12	9	1
High	Master Protein	A0A7U9AVC1	Peroxiredoxin OS=Escherichia coli TA206 OX=656440 GN=ECKG_00441 PE=4 SV=1	FALSE	78.928	48	11	24	11	187	20.8	5.17	43.44	11	1
High	Master Protein	A0A026UII8	Lipoprotein OS=Escherichia coli O174:H8 str. 04-3038 OX=1446704 GN=BW70_24260 PE=4 SV=1	FALSE	77.929	53	6	19	6	171	19	7.31	48.33	6	1
High	Master Protein	A0A5C9AIQ4	OB fold stress tolerance protein YgiW (Fragment) OS=Escherichia coli OX=562 GN=ygiW PE=4 SV=1	FALSE	76.226	88	7	99	1	59	6.7	4.88	182	7	1
High	Master Protein	A0A6C8HIJ1	Putative L,D-transpeptidase YnhG OS=Escherichia coli P0299917.1 OX=1116047 GN=ECP02999171_2279 PE=3 SV=1	FALSE	75.99	35	6	23	1	334	36.1	9.41	55.87	6	1
High	Master Protein	A0A6M0PEX4	PTS glucose transporter subunit IIA OS=Escherichia coli OX=562 GN=crr PE=4 SV=1	FALSE	74.252	41	5	22	5	169	18.2	4.84	49.86	5	1
High	Master Protein	D3GRH2	ABC transporter, substrate-binding protein OS=Escherichia coli O44:H18 (strain 042 / EAEC) OX=216592 GN=EC042_1568 PE=3 SV=1	FALSE	73.71	47	13	20	13	381	42.4	7.08	35.05	13	1
High	Master Protein	sp	ALBU_BOVIN	TRUE	73.457	17	12	30	9	607	69.2	6.18	66.22	12	1
High	Master Protein	A0A0P7NL51	Cytochrome c-552 OS=Escherichia coli OX=562 GN=nrfA PE=3 SV=1	FALSE	72.563	41	14	23	14	478	53.7	7.25	42.96	14	1
High	Master Protein	A0A2A6Q306	Outer membrane protein assembly factor BamD OS=Escherichia coli OX=562 GN=bamD PE=3 SV=1	FALSE	71.96	46	10	26	10	245	27.9	6.09	49.74	10	1
High	Master Protein	A0A6L6S3I8	Outer membrane protein assembly factor BamB OS=Escherichia coli OX=562 GN=bamB PE=3 SV=1	FALSE	71.861	36	10	21	10	392	41.9	4.91	48.09	10	1
High	Master Protein	A0A1E5WQ91	DUF3313 domain-containing protein OS=Escherichia coli OX=562 GN=ydcL PE=4 SV=1	FALSE	71.584	53	8	20	1	222	24.4	8.32	52.37	8	1
High	Master Protein	E9XG54	Periplasmic serine endoprotease DegP-like OS=Escherichia coli TW10509 OX=656449 GN=ERFG_00048 PE=3 SV=1	FALSE	71.562	46	13	16	3	455	47.2	5.95	42.17	13	1
High	Master Protein	D6J9E2	YcgK protein OS=Escherichia coli B354 OX=550677 GN=ECEG_00493 PE=4 SV=1	FALSE	71.423	59	6	21	6	133	14.8	9.41	46.29	6	1
High	Master Protein	A0A377C730	Peptidylprolyl isomerase OS=Escherichia coli OX=562 GN=ppiA_1 PE=4 SV=1	FALSE	71.132	76	6	18	2	113	12.2	9.04	49.17	6	1
High	Master Protein	A0A7U9AVW0	Outer membrane lipoprotein carrier protein LolA OS=Escherichia coli TA206 OX=656440 GN=ECKG_00771 PE=4 SV=1	FALSE	70.896	67	8	27	1	159	17.8	5.27	64.98	8	1
High	Master Protein	A0A210G7C8	DNA-binding protein HU-alpha OS=Escherichia coli OX=562 GN=hupA PE=3 SV=1	FALSE	70.563	58	4	30	4	90	9.5	9.58	57.62	4	1
High	Master Protein	A0A0H2V743	Heat shock protein hslJ OS=Escherichia coli O6:H1 (strain CFT073 / ATCC 700928 / UPEC) OX=199310 GN=hslJ PE=4 SV=1	FALSE	70.501	58	6	29	2	144	15.6	7.87	44.2	6	1
High	Master Protein	D8E0X7	Chaperone protein HtpG OS=Escherichia coli MS 119-7 OX=679206 GN=htpG PE=3 SV=1	FALSE	69.617	32	14	20	14	624	71.4	5.19	32.86	14	1
High	Master Protein	V5UZV4	L8 (Fragment) OS=Escherichia coli OX=562 PE=3 SV=1	FALSE	69.587	51	5	21	5	120	12.2	4.65	57.4	5	1
High	Master Protein	A0A6G4BPS2	Ribosome-associated translation inhibitor RaiA OS=Escherichia coli OX=562 GN=raiA PE=4 SV=1	FALSE	69.401	60	5	14	5	113	12.8	7.06	39.53	5	1
High	Master Protein	Q1RF64	Nucleoid-associated protein YbaB OS=Escherichia coli (strain UTI89 / UPEC) OX=364106 GN=ybaB PE=3 SV=1	FALSE	69.352	72	6	13	6	114	12.6	5.29	35.06	6	1
High	Master Protein	B7NCH9	D-galactose-binding periplasmic protein OS=Escherichia coli O17:K52:H18 (strain UMN026 / ExPEC) OX=585056 GN=mglB PE=3 SV=1	FALSE	69.194	53	15	24	15	332	35.7	6.02	42.98	15	1
High	Master Protein	U9XQA4	Blue copper oxidase CueO OS=Escherichia coli 113303 OX=1268978 GN=HMPREF1591_02708 PE=4 SV=1	FALSE	68.766	24	7	13	7	516	56.6	6.79	30.09	7	1
High	Master Protein	A0A7D5KWE9	Cyclic di-GMP-binding protein OS=Escherichia coli OX=562 GN=bcsB PE=3 SV=1	FALSE	68.23	18	17	25	17	1102	122.6	6.14	41.9	17	1
High	Master Protein	F4UZJ6	Ribonuclease I (Enterobacter ribonuclease)(RNase I) OS=Escherichia coli TA280 OX=656444 GN=ECNG_04796 PE=3 SV=1	FALSE	67.851	43	8	16	8	274	30.2	8.57	35.6	8	1
High	Master Protein	A0A0H0PY88	ABC-type uncharacterized transport system, auxiliary component,Protein of uncharacterized function (DUF330) OS=Escherichia coli OX=562 GN=pqiC PE=4 SV=1	FALSE	67.398	61	6	10	6	187	20.7	6.1	37.14	6	1
High	Master Protein	K4X7Z7	Dipeptide transport protein OS=Escherichia coli O111:H8 str. CVM9634 OX=1165944 GN=ECO9634_29047 PE=3 SV=1	FALSE	67.085	29	11	15	7	535	60.3	6.65	37.28	11	1
High	Master Protein	F4TIW2	Chaperone protein ClpB OS=Escherichia coli M718 OX=656419 GN=clpB PE=3 SV=1	FALSE	66.204	23	14	17	14	861	95.9	5.48	42.4	14	1
High	Master Protein	A0A5D1FIR4	AppA family phytase/histidine-type acid phosphatase OS=Escherichia coli OX=562 GN=DJ503_14450 PE=4 SV=1	FALSE	65.885	32	10	19	10	432	47.1	6.73	44.59	10	1
High	Master Protein	A0A6C9SXV5	Dihydrolipoyl dehydrogenase OS=Escherichia coli OX=562 GN=lpdA PE=3 SV=1	FALSE	65.5	35	12	16	12	474	50.6	6.15	34.66	12	1
High	Master Protein	A0A7U0RZ83	Lipoprotein OS=Escherichia coli OX=562 GN=JK368_02315 PE=4 SV=1	FALSE	65.487	58	7	17	7	192	20.9	8.63	37.55	7	1
High	Master Protein	A0A4Q0C6A8	DUF1471 domain-containing protein OS=Escherichia coli OX=562 GN=EQ820_00475 PE=4 SV=1	FALSE	65.377	52	4	58	2	91	9.9	6.07	146.53	4	1
High	Master Protein	A0A2X1MZ94	Glucans biosynthesis protein G OS=Escherichia coli OX=562 GN=mdoG_1 PE=3 SV=1	FALSE	64.822	34	11	17	1	425	47.8	6.24	42.2	11	1
High	Master Protein	A0A786ZMQ2	50S ribosomal protein L1 OS=Escherichia coli OX=562 GN=rplA PE=3 SV=1	FALSE	64.317	34	6	12	6	234	24.7	9.64	36.12	6	1
High	Master Protein	A0A5E9S917	DUF2884 family protein OS=Escherichia coli OX=562 GN=E2135_03970 PE=4 SV=1	FALSE	64.093	40	7	17	7	239	26.4	9.19	37.18	7	1
High	Master Protein	A0A5C8YV47	Cellulose biosynthesis protein BcsC OS=Escherichia coli OX=562 GN=bcsC PE=4 SV=1	FALSE	63.303	18	14	17	14	1157	127.6	6.24	27.46	14	1
High	Master Protein	A0A1Q4PCL1	Outer membrane lipoprotein RcsF OS=Escherichia coli OX=562 GN=rcsF PE=3 SV=1	FALSE	62.999	65	5	14	5	134	14.2	9.13	39.32	5	1
High	Master Protein	A0A1X3I376	Periplasmic serine endoprotease DegP-like OS=Escherichia coli M056 OX=656415 GN=EAMG_01663 PE=3 SV=1	FALSE	62.381	49	11	14	1	352	36.5	6.33	35.88	11	1
High	Master Protein	A0A0K9T6Z5	META domain-containing protein OS=Escherichia coli M114 OX=656416 GN=ERYG_05286 PE=4 SV=1	FALSE	62.253	49	5	25	1	140	15.1	8.28	40.64	5	1
High	Master Protein	A7ZP28	Periplasmic nitrate reductase OS=Escherichia coli O139:H28 (strain E24377A / ETEC) OX=331111 GN=napA PE=3 SV=1	FALSE	61.75	22	14	17	14	828	93.1	7.91	35.76	14	1
High	Master Protein	D7XIR8	Uncharacterized protein OS=Escherichia coli MS 84-1 OX=749533 GN=HMPREF9536_00900 PE=4 SV=1	FALSE	61.524	41	6	17	6	218	23.8	5.55	38.63	6	1
High	Master Protein	A0A2S8JXG8	Phage shock protein E (Rhodanase-like protein) OS=Escherichia coli OX=562 GN=pspE PE=4 SV=1	FALSE	61.512	43	3	31	3	104	11.5	7.43	69.39	3	1
High	Master Protein	A0A771GZ87	Elongation factor Tu (Fragment) OS=Escherichia coli OX=562 GN=HH129_24200 PE=4 SV=1	FALSE	61.269	77	8	16	2	142	15.8	4.44	36.83	8	1
High	Master Protein	A0A6M0PV20	ATP synthase subunit alpha OS=Escherichia coli OX=562 GN=atpA PE=3 SV=1	FALSE	61.205	21	9	14	1	513	55.2	5.59	27.04	9	1
High	Master Protein	A0A140N7U4	6-phosphogluconate dehydrogenase, decarboxylating OS=Escherichia coli (strain B / BL21-DE3) OX=469008 GN=ECBD_1630 PE=3 SV=1	FALSE	60.92	31	10	13	10	468	51.5	5.07	30.82	10	1
High	Master Protein	A0A6H3MSN9	Glutathione ABC transporter substrate-binding protein GsiB OS=Escherichia coli OX=562 GN=gsiB PE=3 SV=1	FALSE	60.567	26	9	13	9	512	56.4	8.81	35.75	9	1
High	Master Protein	A0A6N9S442	Uncharacterized protein OS=Escherichia coli OX=562 GN=EPS70_07770 PE=4 SV=1	FALSE	59.448	53	5	29	5	120	13.3	9.99	48.4	5	1
High	Master Protein	lcl	[locus_tag=EDL933_3744] [db_xref=GO:0008861] [protein=Pyruvate formate-lyase] [protein_id=AIG69904.1] [location=complement(3523154..3523537)] [gbkey=CDS]	FALSE	59.43	61	7	18	7	127	14.3	5.17	37.42	7	1
High	Master Protein	E9LLX4	Putative transposase OS=Escherichia coli OX=562 GN=AC789_106pl00380 PE=3 SV=1	FALSE	59.403	16	3	11	3	313	35.9	6.14	31.23	3	1
High	Master Protein	U9Z2N6	Uncharacterized protein OS=Escherichia coli 110957 OX=1268975 GN=HMPREF1588_00013 PE=4 SV=1	FALSE	59.301	43	8	21	8	218	24.4	7.8	46.43	8	1
High	Master Protein	E6BNG5	Triosephosphate isomerase OS=Escherichia coli MS 85-1 OX=679202 GN=tpiA PE=3 SV=1	FALSE	59.205	48	8	14	8	249	26.2	5.6	31.08	8	1
High	Master Protein	A0A0A0FER1	Uncharacterized protein OS=Escherichia coli G3/10 OX=1455601 GN=EL76_3520 PE=4 SV=1	FALSE	58.562	45	10	12	10	296	33	8.65	31.59	10	1
High	Master Protein	A0A6D2FHT2	LysM peptidoglycan-binding domain-containing protein OS=Escherichia coli OX=562 GN=D4M70_08050 PE=3 SV=1	FALSE	57.529	35	6	22	1	334	36	9.41	48.8	6	1
High	Master Protein	A0A2W6P8I1	Amino acid ABC transporter substrate-binding protein (Fragment) OS=Escherichia coli OX=562 GN=DNQ45_20955 PE=4 SV=1	FALSE	57.448	61	5	7	1	119	13.2	4.91	26.66	5	1
High	Master Protein	WP_000779085.1	glycerophosphodiester phosphodiesterase [Escherichia coli]	FALSE	57.066	36	10	13	10	358	40.8	5.71	35.3	10	1
High	Master Protein	A0A376JAH4	Phosphate starvation-inducible protein OS=Escherichia coli OX=562 GN=psiF PE=4 SV=1	FALSE	56.661	54	6	29	6	106	11.6	9.88	60.91	6	1
High	Master Protein	F4T849	Putative endoribonuclease L-PSP OS=Escherichia coli M605 OX=656417 GN=ECIG_03185 PE=3 SV=1	FALSE	56.642	65	5	11	4	141	15.2	6.11	33.91	5	1
High	Master Protein	A0A4V2BMS5	Uncharacterized protein OS=Escherichia coli OX=562 GN=EVY14_22790 PE=4 SV=1	FALSE	56.532	59	4	15	4	91	10.4	4.7	42.44	4	1
High	Master Protein	A0A246NZI2	2,3,4,5-tetrahydropyridine-2,6-dicarboxylate N-succinyltransferase OS=Escherichia coli OX=562 GN=dapD PE=3 SV=1	FALSE	56.047	34	8	11	8	274	29.9	5.74	25.42	8	1
High	Master Protein	A0A778NQD8	Anti-sigma-E factor RseA OS=Escherichia coli OX=562 GN=GFX98_05155 PE=3 SV=1	FALSE	56.001	32	4	11	2	216	24.3	5.2	26.73	4	1
High	Master Protein	A0A790FKE8	Uroporphyrinogen-III C-methyltransferase OS=Escherichia coli OX=562 GN=hemX PE=4 SV=1	FALSE	55.785	38	11	14	1	397	43.2	4.75	32.64	11	1
High	Master Protein	A0A7U9G149	Putative periplasmic protein OS=Escherichia coli TA143 OX=656437 GN=ECMG_01833 PE=4 SV=1	FALSE	55.027	43	5	9	1	263	28.2	8.19	28.61	5	1
High	Master Protein	Q1R2A6	Uncharacterized protein OS=Escherichia coli (strain UTI89 / UPEC) OX=364106 GN=UTI89_C5108 PE=4 SV=1	FALSE	54.994	60	5	12	5	148	16.1	8.57	26.9	5	1
High	Master Protein	A0A5P0ZBF6	NAD(P)H dehydrogenase (quinone) OS=Escherichia coli OX=562 GN=wrbA PE=3 SV=1	FALSE	54.852	57	9	27	9	198	20.9	5.86	60.59	9	1
High	Master Protein	A0A376JII8	Glucans biosynthesis protein G OS=Escherichia coli OX=562 GN=mdoG_1 PE=3 SV=1	FALSE	54.68	32	10	15	1	414	46.5	6.47	35.5	10	1
High	Master Protein	A0A5F1E974	Acid stress chaperone HdeA OS=Escherichia coli OX=562 GN=hdeA PE=3 SV=1	FALSE	53.633	55	2	69	1	110	11.8	5.25	236.31	2	1
High	Master Protein	A0A4Y8H1W5	Protein YebF OS=Escherichia coli OX=562 GN=yebF PE=3 SV=1	FALSE	53.325	39	3	7	3	118	12.9	8.9	21.98	3	1
High	Master Protein	lcl	[locus_tag=EDL933_4526] [protein=LSU ribosomal protein L24p (L26e)] [protein_id=AIG70674.1] [location=complement(4270092..4270406)] [gbkey=CDS]	FALSE	53.278	61	6	15	6	104	11.3	10.21	35.21	6	1
High	Master Protein	V0SU16	Periplasmic murein peptide-binding protein OS=Escherichia coli 907672 OX=1268982 GN=HMPREF1595_01341 PE=3 SV=1	FALSE	53.206	19	8	17	3	544	60.7	8.7	37.87	8	1
High	Master Protein	A0A5F1DZ58	Osmotically-inducible lipoprotein OsmE OS=Escherichia coli OX=562 GN=osmE PE=4 SV=1	FALSE	53.123	67	5	38	1	112	12	7.87	73.9	5	1
High	Master Protein	A0A0K3UEF5	Copper homeostasis protein (Lipoprotein nlpE) OS=Escherichia coli OX=562 GN=cutF PE=4 SV=1	FALSE	52.988	45	8	19	1	236	25.8	5.2	43.01	8	1
High	Master Protein	B7MGE9	Glutamine--fructose-6-phosphate aminotransferase [isomerizing] OS=Escherichia coli O45:K1 (strain S88 / ExPEC) OX=585035 GN=glmS PE=3 SV=1	FALSE	52.832	25	10	14	10	609	66.8	5.87	24.83	10	1
High	Master Protein	A0A5C9AED3	D-alanyl-D-alanine carboxypeptidase OS=Escherichia coli OX=562 GN=FWK02_28255 PE=4 SV=1	FALSE	52.29	30	8	16	1	316	34.7	8.79	35.07	8	1
High	Master Protein	A0A3S7CL53	Histidine ABC transporter substrate-binding protein HisJ OS=Escherichia coli OX=562 GN=BWI89_01590 PE=3 SV=1	FALSE	51.988	43	9	14	9	260	27.9	5.59	32.51	9	1
High	Master Protein	Q8XAA8	Ancillary SecYEG translocon subunit OS=Escherichia coli O157:H7 OX=83334 GN=Z3776 PE=3 SV=2	FALSE	51.714	44	7	12	7	206	22.2	5.16	37.3	7	1
High	Master Protein	lcl	[locus_tag=EDL933_4520] [db_xref=GO:0003735,GO:0005622,GO:0005840,GO:0006412] [protein=SSU ribosomal protein S5p (S2e)] [protein_id=AIG70668.1] [location=complement(4267365..4267868)] [gbkey=CDS]	FALSE	51.625	55	7	18	7	167	17.6	10.11	36.37	7	1
High	Master Protein	E9XUP7	Glutamine synthetase OS=Escherichia coli TW10509 OX=656449 GN=ERFG_04801 PE=3 SV=1	FALSE	51.589	37	12	16	12	469	51.9	5.53	26.86	12	1
High	Master Protein	A0A074I9L3	Transaldolase OS=Escherichia coli 1-392-07_S4_C1 OX=1444219 GN=tal PE=3 SV=1	FALSE	51.31	39	9	11	9	317	35.2	5.21	31.34	9	1
High	Master Protein	A0A6M1IFZ6	L,D-transpeptidase OS=Escherichia coli OX=562 GN=ldtB PE=3 SV=1	FALSE	51.101	34	5	10	5	306	33.3	6.4	34.16	5	1
High	Master Protein	A0A7L7X7V0	Peptidoglycan glycosyltransferase/peptidoglycan DD-transpeptidase MrcA OS=Escherichia coli O18ac:H14 OX=2773705 GN=mrcA PE=4 SV=1	FALSE	50.813	16	9	15	2	850	93.5	6.51	33.42	9	1
High	Master Protein	A0A1M0D4K2	Cell division coordinator CpoB OS=Escherichia coli OX=562 GN=cpoB PE=3 SV=1	FALSE	50.788	43	5	9	1	263	28.2	8.19	25.12	5	1
High	Master Protein	A0A5F1DPR6	Thiamine-binding periplasmic protein OS=Escherichia coli OX=562 GN=thiB PE=3 SV=1	FALSE	50.287	32	8	10	8	327	36.2	6.6	24.72	8	1
High	Master Protein	A0A6C9I847	Lipopolysaccharide export system protein LptA OS=Escherichia coli OX=562 GN=lptA PE=3 SV=1	FALSE	49.808	28	5	12	5	185	20.1	8.98	25.88	5	1
High	Master Protein	A0A3T9E839	TIGR00156 family protein OS=Escherichia coli OX=562 GN=DNI21_08095 PE=4 SV=1	FALSE	49.324	62	8	17	8	130	14.1	6.95	35.19	8	1
High	Master Protein	A0A0A0FCD2	Long-chain fatty acid transport protein OS=Escherichia coli G3/10 OX=1455601 GN=EL76_1456 PE=3 SV=1	FALSE	49.163	31	7	11	7	446	48.5	5.21	27.36	7	1
High	Master Protein	A0A4C7B620	ABC transporter periplasmic binding protein OS=Escherichia coli OX=562 GN=osmF PE=4 SV=1	FALSE	48.766	33	9	16	9	305	32.5	5.54	32.06	9	1
High	Master Protein	A0A3Q0P191	Glutaredoxin OS=Escherichia coli OX=562 GN=AJ318_19400 PE=3 SV=1	FALSE	48.573	78	5	11	5	83	9.2	7.24	34.52	5	1
High	Master Protein	A0A1X3KA41	50S ribosomal protein L31 OS=Escherichia coli H605 OX=656410 GN=rpmE PE=3 SV=1	FALSE	48.122	53	3	17	3	70	7.8	9.32	46.09	3	1
High	Master Protein	A0A4C4JKH4	DNA-directed RNA polymerase subunit alpha OS=Escherichia coli OX=562 GN=rpoA PE=3 SV=1	FALSE	47.377	34	9	14	9	329	36.5	5.06	28.88	9	1
High	Master Protein	A0A7U1F3C8	Cell division protein DamX OS=Escherichia coli OX=562 GN=damX PE=4 SV=1	FALSE	47.276	32	11	18	11	428	46.1	5.81	41.22	11	1
High	Master Protein	WP_024222502.1	F4 (K88) fimbrial chaperone FaeE [Escherichia coli]	FALSE	47.105	50	10	15	10	259	28.6	9.58	25	10	1
High	Master Protein	A0A3J2BS80	Protein CreA OS=Escherichia coli OX=562 GN=creA PE=4 SV=1	FALSE	46.805	45	5	12	5	157	17.1	8.95	29.3	5	1
High	Master Protein	A0A377CQJ1	Insulinase family protein OS=Escherichia coli OX=562 GN=yhjJ PE=3 SV=1	FALSE	46.446	26	10	14	10	498	55.5	6.02	28.72	10	1
High	Master Protein	A0A5C8Y264	LPS-assembly lipoprotein LptE OS=Escherichia coli OX=562 GN=lptE PE=3 SV=1	FALSE	46.363	36	6	16	6	193	21.4	8.68	38.12	6	1
High	Master Protein	A0A5F1EMT0	DD-transpeptidase OS=Escherichia coli OX=562 GN=CQB02_21755 PE=3 SV=1	FALSE	46.144	16	9	14	2	850	93.6	6.87	30.72	9	1
High	Master Protein	U9XWS4	SmpA / OmlA family protein OS=Escherichia coli 113303 OX=1268978 GN=HMPREF1591_01739 PE=4 SV=1	FALSE	46.103	67	5	38	1	112	12.1	7.87	70.73	5	1
High	Master Protein	extdb	DNA-binding protein HU-beta [Escherichia coli]	FALSE	45.757	52	4	15	4	90	9.2	9.7	37.75	4	1
High	Master Protein	F4NKE3	10 kDa chaperonin (Fragment) OS=Escherichia coli D9 OX=556266 GN=groS PE=3 SV=1	FALSE	45.664	45	4	15	1	114	12.1	4.97	34.39	4	1
High	Master Protein	U9ZK11	Thioredoxin OS=Escherichia coli 907713 OX=1268986 GN=HMPREF1599_03322 PE=3 SV=1	FALSE	45.193	47	5	16	5	127	14	5.24	26.58	5	1
High	Master Protein	A0A1X3KA42	DNA-directed RNA polymerase subunit omega OS=Escherichia coli H605 OX=656410 GN=rpoZ PE=3 SV=1	FALSE	45.18	49	4	8	4	91	10.2	4.92	20.87	4	1
High	Master Protein	V0YB56	Protein GrpE OS=Escherichia coli 908525 OX=1268995 GN=grpE PE=3 SV=1	FALSE	44.918	40	4	7	4	196	21.7	4.75	11.67	4	1
High	Master Protein	A0A5E8M1W1	Glutamate decarboxylase (Fragment) OS=Escherichia coli OX=562 GN=D9F32_09840 PE=4 SV=1	FALSE	44.776	60	5	13	1	116	13.2	5.27	25.88	5	1
High	Master Protein	A0A1X3LA91	Elongation factor Tu (EF-Tu) (P-43) OS=Escherichia coli TA054 OX=656433 GN=EAXG_05057 PE=4 SV=1	FALSE	44.618	43	7	16	5	171	18.8	8.13	28.2	7	1
High	Master Protein	A0A3K4K6U1	50S ribosomal protein L6 OS=Escherichia coli OX=562 GN=rplF PE=3 SV=1	FALSE	44.597	46	7	11	7	177	18.9	9.7	22.93	7	1
High	Master Protein	A0A2D0NLL4	Chaperone protein Skp OS=Escherichia coli O127:H6 OX=168807 GN=skp PE=3 SV=1	FALSE	43.801	35	5	29	1	133	14.9	9.7	35.23	5	1
High	Master Protein	A0A479DV77	Transcriptional regulator OS=Escherichia coli OX=562 GN=ytfJ_2 PE=4 SV=1	FALSE	43.646	44	7	12	1	185	20.6	9.16	29.22	7	1
High	Master Protein	A0A6M0PQE0	Outer membrane protein A OS=Escherichia coli OX=562 GN=ompA PE=3 SV=1	FALSE	43.58	13	5	57	1	350	37.9	6.06	90.87	5	1
High	Master Protein	A0A0K4GHQ6	Acid stress chaperone HdeA OS=Escherichia coli OX=562 GN=hdeA PE=3 SV=1	FALSE	43.24	54	2	35	2	111	11.9	5.58	95.46	2	1
High	Master Protein	A0A222QQQ0	Glyoxalase OS=Escherichia coli NCCP15648 OX=1200752 GN=A610_3891 PE=3 SV=1	FALSE	42.788	38	4	9	4	217	23	4.77	17.41	4	1
High	Master Protein	D3Y2X0	Cold shock-like protein OS=Escherichia coli OX=562 GN=cspC PE=4 SV=1	FALSE	42.611	78	4	17	4	69	7.4	7.24	33.15	4	1
High	Master Protein	D7XDM8	NlpE_C domain-containing protein OS=Escherichia coli MS 198-1 OX=749549 GN=HMPREF9552_04797 PE=4 SV=1	FALSE	42.347	45	8	17	1	236	25.9	5.1	37.37	8	1
High	Master Protein	A0A073HGL3	50S ribosomal protein L22 OS=Escherichia coli 5-366-08_S1_C3 OX=1444102 GN=rplV PE=3 SV=1	FALSE	42.344	47	5	9	5	110	12.2	10.23	21.12	5	1
High	Master Protein	V0VHJ6	Outer membrane protein assembly factor BamE OS=Escherichia coli 908519 OX=1268991 GN=bamE PE=3 SV=1	FALSE	42.002	49	2	8	2	113	12.3	8.51	20.87	2	1
High	Master Protein	A0A2X1JA99	Murein hydrolase activator NlpD OS=Escherichia coli OX=562 GN=nlpD PE=4 SV=1	FALSE	41.966	22	7	14	7	379	40.1	9.51	30.1	7	1
High	Master Protein	A0A0D0NE57	UPF0194 membrane protein YbhG OS=Escherichia coli OX=562 GN=ybhG PE=3 SV=1	FALSE	41.875	31	7	11	1	331	36.2	5.6	24.78	7	1
High	Master Protein	A0A6M0PFH3	Peptidyl-prolyl cis-trans isomerase OS=Escherichia coli OX=562 GN=ppiA PE=3 SV=1	FALSE	41.514	31	4	10	1	190	20.3	8.94	22.05	4	1
High	Master Protein	V0Z4G9	Uncharacterized protein OS=Escherichia coli 908573 OX=1268998 GN=HMPREF1611_01888 PE=4 SV=1	FALSE	41.193	40	3	20	1	126	12.9	4.88	23.91	3	1
High	Master Protein	A0A1X3LME0	Protease 7 (Protease VII) (Omptin) (Outermembrane protein 3B) (Protease A) OS=Escherichia coli TA054 OX=656433 GN=EAXG_05135 PE=3 SV=1	FALSE	41.162	23	5	18	2	315	35.5	7.44	30.86	5	1
High	Master Protein	A0A7H5D8I1	Major outer membrane lipoprotein Lpp OS=Escherichia coli OX=562 GN=lpp PE=3 SV=1	FALSE	41.053	42	3	41	3	78	8.2	8.79	62.77	3	1
High	Master Protein	K4WHW3	Serine-type D-Ala-D-Ala carboxypeptidase OS=Escherichia coli O111:H11 str. CVM9455 OX=1165939 GN=ECO9455_11896 PE=3 SV=1	FALSE	40.958	22	8	14	8	403	44.4	8.54	30.96	8	1
High	Master Protein	A0A6D0SJ33	Transketolase OS=Escherichia coli OX=562 GN=tkt PE=3 SV=1	FALSE	40.616	13	8	9	8	663	72.1	5.73	24.17	8	1
High	Master Protein	A0A1X3LKC0	Putative outer membrane protein OS=Escherichia coli TA054 OX=656433 GN=EAXG_01325 PE=4 SV=1	FALSE	40.094	41	6	9	6	193	20.9	9.54	18.77	6	1
High	Master Protein	A0A6M0PFM1	Arginine ABC transporter substrate-binding protein OS=Escherichia coli OX=562 GN=artJ PE=3 SV=1	FALSE	40.07	24	6	18	2	243	26.7	8.29	38.02	6	1
High	Master Protein	K4W433	Putative transcriptional regulator OS=Escherichia coli O111:H8 str. CVM9634 OX=1165944 GN=ECO9634_19311 PE=4 SV=1	FALSE	39.899	43	7	11	1	185	20.7	9.33	25.73	7	1
High	Master Protein	A0A7U9QC98	Heat shock chaperone OS=Escherichia coli O145:H28 OX=1078034 GN=ibpA PE=4 SV=1	FALSE	39.245	60	6	8	6	137	15.8	5.83	22.44	6	1
High	Master Protein	A0A6L4XIU5	Peptidyl-prolyl cis-trans isomerase OS=Escherichia coli OX=562 GN=ppiA PE=3 SV=1	FALSE	39.088	26	3	7	1	190	20.3	8.34	22.5	3	1
High	Master Protein	lcl	[locus_tag=EDL933_5547] [db_xref=GO:0003735,GO:0005622,GO:0005840,GO:0006412] [protein=LSU ribosomal protein L9p] [protein_id=AIG71686.1] [location=5328700..5329149] [gbkey=CDS]	FALSE	39.015	46	6	12	6	149	15.8	6.58	26.84	6	1
High	Master Protein	F4NQ82	2,3-bisphosphoglycerate-independent phosphoglycerate mutase OS=Escherichia coli D9 OX=556266 GN=gpmI PE=3 SV=1	FALSE	38.837	22	8	10	1	523	57.1	5.25	21.61	8	1
High	Master Protein	A0A6C8HAD4	Cytochrome c family protein OS=Escherichia coli P0299917.1 OX=1116047 GN=ECP02999171_4596 PE=4 SV=1	FALSE	38.572	20	7	11	7	465	51.5	6.18	24.73	7	1
High	Master Protein	B7UN63	Caps_synth_GfcC domain-containing protein OS=Escherichia coli O127:H6 (strain E2348/69 / EPEC) OX=574521 GN=gfcC PE=1 SV=1	FALSE	38.302	23	5	10	5	248	27.3	5.58	18.47	5	1
High	Master Protein	A0A7L5HT94	Peroxiredoxin OsmC OS=Escherichia coli OX=562 GN=osmC PE=4 SV=1	FALSE	38.211	48	5	9	5	143	15.1	5.86	24.1	5	1
High	Master Protein	A0A2A3VRV9	Soluble cytochrome b562 OS=Escherichia coli OX=562 GN=cybC PE=3 SV=1	FALSE	37.654	38	5	14	5	128	14.1	7.4	37.21	5	1
High	Master Protein	F4VMS3	N-acetylneuraminate epimerase OS=Escherichia coli H591 OX=656408 GN=nanM PE=3 SV=1	FALSE	37.622	30	9	12	9	397	42.9	8.48	28.97	9	1
High	Master Protein	A0A4D1KFF6	Lipoprotein OS=Escherichia coli OX=562 GN=ygdI PE=4 SV=1	FALSE	37.532	27	1	25	1	75	8.2	5.97	26.38	1	1
High	Master Protein	A0A271UEQ3	DNA-binding protein OS=Escherichia coli OX=562 GN=stpA PE=3 SV=1	FALSE	37.516	56	6	11	6	134	15.4	8.4	25.95	6	1
High	Master Protein	A0A2W6R5S7	Glutamine ABC transporter substrate-binding protein GlnH (Fragment) OS=Escherichia coli OX=562 GN=glnH PE=3 SV=1	FALSE	37.401	59	4	7	1	78	8.5	6	20.66	4	1
High	Master Protein	A0A023YSF1	Aminoacyl-histidine dipeptidase (Peptidase D) OS=Escherichia coli O145:H28 (strain RM12581) OX=1248823 GN=pepD PE=4 SV=1	FALSE	37.383	18	7	9	7	485	52.9	5.39	20.63	7	1
High	Master Protein	K4VKM6	RpoE-regulated lipoprotein OS=Escherichia coli O111:H8 str. CVM9634 OX=1165944 GN=ECO9634_03304 PE=4 SV=1	FALSE	37.151	32	3	5	3	188	20.5	5.07	19.7	3	1
High	Master Protein	E9XHS0	Membrane-bound lytic murein transglycosylase A OS=Escherichia coli TW10509 OX=656449 GN=ERFG_00505 PE=4 SV=1	FALSE	37.14	25	5	6	5	355	39.1	8.46	24.01	5	1
High	Master Protein	A0A070FAY8	Murein L,D-transpeptidase OS=Escherichia coli O128:H2 str. 2011C-3317 OX=1446581 GN=BU64_31805 PE=3 SV=1	FALSE	36.861	16	7	11	7	615	67.7	8.57	21.38	7	1
High	Master Protein	A0A5E8HMC9	Pitrilysin OS=Escherichia coli OX=562 GN=ptrA PE=3 SV=1	FALSE	36.567	13	9	10	9	962	107.6	6.09	17.35	9	1
High	Master Protein	A0A5C8YTV5	2,3-bisphosphoglycerate-independent phosphoglycerate mutase OS=Escherichia coli OX=562 GN=gpmM PE=3 SV=1	FALSE	36.291	21	8	9	1	514	56.1	5.34	23.94	8	1
High	Master Protein	A0A2D0P0D6	Superoxide dismutase OS=Escherichia coli O127:H6 OX=168807 GN=sodA PE=3 SV=1	FALSE	36.227	21	3	6	3	206	23.1	6.96	18.36	3	1
High	Master Protein	extdb	co-chaperone GroES [Escherichia coli]	FALSE	36.223	47	4	10	1	97	10.4	5.24	24.66	4	1
High	Master Protein	M9HFG5	Purine nucleoside phosphorylase DeoD-type OS=Escherichia coli MP021561.2 OX=1116136 GN=deoD PE=3 SV=1	FALSE	35.99	44	8	9	8	239	25.9	5.66	23.11	8	1
High	Master Protein	A0A1V3VR67	Increased serum survival lipoprotein Iss OS=Escherichia coli OX=562 GN=iss PE=4 SV=1	FALSE	35.655	55	3	21	1	94	10	7.24	36	3	1
High	Master Protein	V0YFL6	50S ribosomal protein L29 OS=Escherichia coli 908525 OX=1268995 GN=rpmC PE=3 SV=1	FALSE	35.569	46	2	7	2	63	7.3	10.36	19.43	2	1
High	Master Protein	A0A0F3U9R9	Acidic protein MsyB OS=Escherichia coli OX=562 GN=msyB PE=4 SV=1	FALSE	35.404	62	4	6	4	124	14.2	3.73	16.86	4	1
High	Master Protein	A0A140NGG7	30S ribosomal protein S6 OS=Escherichia coli (strain B / BL21-DE3) OX=469008 GN=rpsF PE=3 SV=1	FALSE	35.126	40	4	8	4	131	15.2	5.39	21.5	4	1
High	Master Protein	A0A0K4V6P1	C-lysozyme inhibitor OS=Escherichia coli OX=562 GN=ivy PE=3 SV=1	FALSE	35.123	23	3	25	1	148	15.8	6.52	42.93	3	1
High	Master Protein	A0A234Y2B9	Putrescine-binding periplasmic protein OS=Escherichia coli OX=562 GN=DMZ30_13015 PE=3 SV=1	FALSE	35.115	26	6	8	6	370	40.8	6.2	22.27	6	1
High	Master Protein	extdb	translation initiation factor IF-3 [Escherichia coli]	FALSE	35.003	29	3	5	3	180	20.6	9.52	16	3	1
High	Master Protein	B7MRB4	DNA-directed RNA polymerase subunit beta' OS=Escherichia coli O81 (strain ED1a) OX=585397 GN=rpoC PE=3 SV=1	FALSE	34.996	8	9	10	9	1407	155.1	7.08	17.71	9	1
High	Master Protein	E9TBZ2	Uncharacterized protein OS=Escherichia coli MS 117-3 OX=749539 GN=HMPREF9542_01285 PE=4 SV=1	FALSE	34.607	32	6	10	1	229	26.2	5.88	18.22	6	1
High	Master Protein	C3SJ47	CDP-diacylglycerol phosphotidylhydrolase OS=Escherichia coli OX=562 GN=sbp PE=3 SV=1	FALSE	34.027	21	6	7	6	329	36.7	7.15	17.91	6	1
High	Master Protein	A0A2T3UWS5	Oligopeptide ABC transporter substrate-binding protein OppA (Fragment) OS=Escherichia coli OX=562 GN=C9E25_22380 PE=3 SV=1	FALSE	33.931	17	6	11	1	461	51.8	9.01	21.72	6	1
High	Master Protein	A0A376V7T9	UPF0194 membrane protein YbhG OS=Escherichia coli OX=562 GN=macA_2 PE=3 SV=1	FALSE	33.694	30	7	10	1	331	36.2	5.45	19.78	7	1
High	Master Protein	A0A7U1F0Y5	Protein-methionine-sulfoxide reductase catalytic subunit MsrP OS=Escherichia coli OX=562 GN=msrP PE=4 SV=1	FALSE	33.607	24	6	9	6	334	37.3	9.16	16.54	6	1
High	Master Protein	D8E6H4	Protein ErfK/srfK OS=Escherichia coli MS 119-7 OX=679206 GN=erfK PE=3 SV=1	FALSE	33.558	26	7	10	7	277	30.8	8.1	23.34	7	1
High	Master Protein	A0A7U9BP66	Hydrolase OS=Escherichia coli H299 OX=656393 GN=ECOG_04456 PE=4 SV=1	FALSE	33.229	20	7	9	7	455	50.5	5.96	20.34	7	1
High	Master Protein	A0A3L5H0F3	Deoxyribose-phosphate aldolase OS=Escherichia coli OX=562 GN=deoC PE=3 SV=1	FALSE	33.152	34	7	7	7	259	27.7	6.25	18.26	7	1
High	Master Protein	A0A1X3LK76	2-dehydro-3-deoxy-phosphogluconate aldolase OS=Escherichia coli TA054 OX=656433 GN=EAXG_01372 PE=3 SV=1	FALSE	33.071	26	4	7	4	213	22.2	5.39	20.13	4	1
High	Master Protein	U9YDN6	Maltose operon periplasmic protein OS=Escherichia coli 113290 OX=1268976 GN=HMPREF1589_01639 PE=4 SV=1	FALSE	32.598	17	4	11	4	306	31.9	8.02	29.22	4	1
High	Master Protein	D6J8P2	Aminotransferase OS=Escherichia coli B354 OX=550677 GN=ECEG_00238 PE=3 SV=1	FALSE	32.473	26	9	11	9	396	43.5	5.94	13.02	9	1
High	Master Protein	A0A478GL05	Uncharacterized protein OS=Escherichia coli OX=562 GN=ybgS PE=4 SV=1	FALSE	32.44	40	3	14	1	126	12.9	4.78	23.91	3	1
High	Master Protein	A0A0H2V705	Outer membrane protein W OS=Escherichia coli O6:H1 (strain CFT073 / ATCC 700928 / UPEC) OX=199310 GN=ompW PE=4 SV=1	FALSE	32.337	23	3	7	3	238	25.9	6.42	16.12	3	1
High	Master Protein	A0A781XBA3	DUF406 domain-containing protein OS=Escherichia coli OX=562 GN=HH460_002997 PE=3 SV=1	FALSE	32.27	45	3	7	3	99	10.7	4.68	18.61	3	1
High	Master Protein	A0A7D4R6E5	Potassium binding protein Kbp OS=Escherichia coli O10:H32 OX=2603836 GN=kbp PE=4 SV=1	FALSE	32.059	48	6	10	6	149	16.1	6	22.92	6	1
High	Master Protein	A0A0K9TDN9	Uncharacterized protein OS=Escherichia coli M114 OX=656416 GN=ERYG_02393 PE=4 SV=1	FALSE	31.946	32	6	10	1	237	27.2	6.15	15.2	6	1
High	Master Protein	A0A3W3FJZ4	50S ribosomal protein L10 OS=Escherichia coli OX=562 GN=rplJ PE=1 SV=1	FALSE	31.74	49	6	11	6	165	17.7	8.98	17.03	6	1
High	Master Protein	A0A3U5UQ40	Universal stress protein OS=Escherichia coli OX=562 GN=uspD PE=3 SV=1	FALSE	31.604	31	3	11	3	142	16.3	6.87	17.11	3	1
High	Master Protein	D6IED7	50S ribosomal protein L13 OS=Escherichia coli B185 OX=550676 GN=rplM PE=3 SV=1	FALSE	31.454	40	5	11	5	167	18.8	9.66	16.48	5	1
High	Master Protein	A0A077K5Q0	30S ribosomal protein S10 OS=Escherichia coli O157 OX=1045010 GN=rpsJ PE=3 SV=1	FALSE	31.124	35	4	7	4	103	11.7	9.32	17.26	4	1
High	Master Protein	A0A3W5XVL0	Fructose-bisphosphate aldolase OS=Escherichia coli OX=562 GN=EAN77_06185 PE=3 SV=1	FALSE	30.94	24	5	9	5	359	39.2	5.86	19.11	5	1
High	Master Protein	A0A3L4ZAS4	Lipoprotein OS=Escherichia coli OX=562 GN=metQ PE=3 SV=1	FALSE	30.904	27	5	7	5	271	29.4	5.29	23.15	5	1
High	Master Protein	A0A5D8SZ32	Copper-exporting P-type ATPase CopA OS=Escherichia coli OX=562 GN=copA PE=3 SV=1	FALSE	30.877	8	3	7	3	834	87.9	5.58	10.21	3	1
High	Master Protein	D6J529	UPF0337 protein YjbJ OS=Escherichia coli B354 OX=550677 GN=ECEG_02698 PE=3 SV=1	FALSE	30.852	41	4	14	4	71	8.6	5.55	17.99	4	1
High	Master Protein	A0A074HTA3	Bacterial extracellular solute-binding s, 3 family protein OS=Escherichia coli 1-392-07_S4_C1 OX=1444219 GN=AC84_3783 PE=3 SV=1	FALSE	30.73	21	6	7	6	341	37	5.49	18.93	6	1
High	Master Protein	A0A1X3ICA1	30S ribosomal protein S2 OS=Escherichia coli M056 OX=656415 GN=rpsB PE=3 SV=1	FALSE	30.71	28	6	12	6	306	34.3	7.62	27.64	6	1
High	Master Protein	A0A0K4JUD1	Membrane protein insertase YidC OS=Escherichia coli OX=562 GN=oxaA PE=3 SV=1	FALSE	30.571	15	5	8	5	548	61.5	7.99	13.3	5	1
High	Master Protein	WP_001342072.1	chaperedoxin [Escherichia coli]	FALSE	30.491	33	6	6	6	284	31.8	4.59	18.44	6	1
High	Master Protein	A0A4Q0CU61	30S ribosomal protein S7 OS=Escherichia coli OX=562 GN=rpsG PE=3 SV=1	FALSE	30.482	37	5	10	5	156	17.6	10.3	19.52	5	1
High	Master Protein	Q8X881	Uncharacterized protein OS=Escherichia coli O157:H7 OX=83334 GN=Z0955 PE=4 SV=2	FALSE	30.362	22	6	7	6	319	34.9	6.35	17.33	6	1
High	Master Protein	A0A6D1AUH2	Isoleucine--tRNA ligase OS=Escherichia coli OX=562 GN=ileS PE=3 SV=1	FALSE	29.077	9	7	9	7	938	104.2	6.01	14.52	7	1
High	Master Protein	A0A0V7X3S8	Aspartate ammonia-lyase OS=Escherichia coli OX=562 GN=aspA PE=3 SV=1	FALSE	28.865	16	6	8	6	478	52.3	5.22	11.21	6	1
High	Master Protein	D6J606	RNA polymerase-binding transcription factor DksA OS=Escherichia coli B354 OX=550677 GN=dksA PE=3 SV=1	FALSE	28.751	19	2	7	2	157	18.3	5.36	16.74	2	1
High	Master Protein	WP_000194053.1	hypothetical protein [Escherichia coli]	FALSE	28.735	62	6	8	6	128	14.8	5.1	16.42	6	1
High	Master Protein	A7ZUP3	Glucose-6-phosphate isomerase OS=Escherichia coli O139:H28 (strain E24377A / ETEC) OX=331111 GN=pgi PE=3 SV=1	FALSE	28.623	15	7	8	7	549	61.4	6.37	19.79	7	1
High	Master Protein	A0A6L2GFR1	50S ribosomal protein L11 OS=Escherichia coli OX=562 GN=rplK PE=3 SV=1	FALSE	28.511	38	5	9	5	142	14.9	9.63	24.03	5	1
High	Master Protein	A0A789BRA1	Lipoprotein OS=Escherichia coli OX=562 GN=WP7S17E04_12990 PE=3 SV=1	FALSE	28.307	22	4	8	4	251	28	5.05	20.52	4	1
High	Master Protein	A0A376TTX9	Sigma-E factor regulatory protein OS=Escherichia coli OX=562 GN=rseB PE=3 SV=1	FALSE	28.26	12	4	8	2	535	60.2	6.48	19.95	4	1
High	Master Protein	A0A6M0PEW2	50S ribosomal protein L17 OS=Escherichia coli OX=562 GN=rplQ PE=3 SV=1	FALSE	28.098	27	4	8	4	128	14.5	11.05	15.91	4	1
High	Master Protein	E9XRN6	Entericidin EcnA/B family protein OS=Escherichia coli TW10509 OX=656449 GN=ERFG_03734 PE=3 SV=1	FALSE	28.056	40	1	12	1	48	4.8	8.21	25.66	1	1
High	Master Protein	E9YV62	50S ribosomal protein L3 OS=Escherichia coli M863 OX=656420 GN=rplC PE=3 SV=1	FALSE	27.969	37	6	9	6	209	22.2	9.91	11.83	6	1
High	Master Protein	A0A6M0PFJ1	Outer membrane protein X OS=Escherichia coli OX=562 GN=ompX PE=3 SV=1	FALSE	27.938	18	2	15	1	169	18	8.02	31.8	2	1
High	Master Protein	lcl	[locus_tag=EDL933_2092] [protein=hypothetical protein] [protein_id=AIG68280.1] [location=complement(1940472..1940675)] [gbkey=CDS]	FALSE	27.69	66	4	14	4	67	7.3	8.21	31.69	4	1
High	Master Protein	A0A366YLD4	Acyl carrier protein OS=Escherichia coli OX=562 GN=acpP PE=3 SV=1	FALSE	27.628	41	3	14	3	78	8.6	4.16	34.72	3	1
High	Master Protein	WP_001130207.1	MULTISPECIES: S-ribosylhomocysteine lyase [Enterobacteriaceae]	FALSE	27.579	58	6	9	6	171	19.4	5.54	15.33	6	1
High	Master Protein	A0A6M0PC40	Adenylate kinase OS=Escherichia coli OX=562 GN=adk PE=3 SV=1	FALSE	27.332	35	6	8	6	214	23.5	5.74	14.54	6	1
High	Master Protein	V0Z2I1	Iron uptake system component EfeO OS=Escherichia coli 908573 OX=1268998 GN=HMPREF1611_02293 PE=3 SV=1	FALSE	27.075	15	4	5	4	375	41.1	5.17	11.54	4	1
High	Master Protein	A0A028AK29	Membrane protein OS=Escherichia coli O69:H11 str. 08-4661 OX=1446753 GN=BX06_08510 PE=4 SV=1	FALSE	27.025	35	4	5	4	252	27.6	5.26	11.69	4	1
High	Master Protein	lcl	[locus_tag=EDL933_3767] [db_xref=GO:0003735,GO:0005622,GO:0005840,GO:0006412] [protein=LSU ribosomal protein L19p] [protein_id=AIG69927.1] [location=complement(3551192..3551539)] [gbkey=CDS]	FALSE	26.916	59	6	9	6	115	13.1	10.62	23.45	6	1
High	Master Protein	A0A070F4K1	Uncharacterized protein OS=Escherichia coli O128:H2 str. 2011C-3317 OX=1446581 GN=BU64_32955 PE=4 SV=1	FALSE	26.809	40	3	12	1	126	12.8	4.88	23.91	3	1
High	Master Protein	A0A5C9AJJ8	Methionine adenosyltransferase (Fragment) OS=Escherichia coli OX=562 GN=metK PE=3 SV=1	FALSE	26.759	22	5	6	5	372	40.7	5.12	12.34	5	1
High	Master Protein	A0A4T7YQS4	Murein hydrolase activator EnvC OS=Escherichia coli OX=562 GN=envC PE=4 SV=1	FALSE	26.741	17	6	8	6	427	47.5	9.98	13.31	6	1
High	Master Protein	A0A2A3W3D3	Phosphoglucomutase OS=Escherichia coli OX=562 GN=pgm PE=3 SV=1	FALSE	26.705	8	3	5	3	546	58.4	5.71	13.69	3	1
High	Master Protein	A0A6L4XG38	Ribose-phosphate pyrophosphokinase OS=Escherichia coli OX=562 GN=prs PE=3 SV=1	FALSE	26.429	21	5	7	5	315	34.2	5.44	14.49	5	1
High	Master Protein	A0A6C9I8D6	UPF0234 protein YajQ OS=Escherichia coli OX=562 GN=yajQ PE=3 SV=1	FALSE	26.228	43	5	6	5	163	18.2	6.24	12.54	5	1
High	Master Protein	A0A417ZTM2	Protein YceI OS=Escherichia coli OX=562 GN=yceI PE=3 SV=1	FALSE	26.215	56	7	7	7	191	20.9	5.91	14.93	7	1
High	Master Protein	F4SGG0	Uncharacterized protein OS=Escherichia coli H736 OX=656414 GN=ECHG_00962 PE=4 SV=1	FALSE	26.061	22	1	3	1	122	13.3	6.52	15.98	1	1
High	Master Protein	E9T9R1	Endonuclease OS=Escherichia coli MS 117-3 OX=749539 GN=nuc PE=4 SV=1	FALSE	25.959	46	5	5	5	155	17.3	6.96	13.82	5	1
High	Master Protein	A0A0B1LWP9	Uncharacterized protein (Fragment) OS=Escherichia coli OX=562 GN=PU06_29495 PE=4 SV=1	FALSE	25.769	28	5	8	5	241	26.6	5.54	10.31	5	1
High	Master Protein	A0A026UFP8	Monooxygenase OS=Escherichia coli O174:H8 str. 04-3038 OX=1446704 GN=BW70_27535 PE=4 SV=1	FALSE	25.733	40	4	8	2	101	11.3	5.15	20.31	4	1
High	Master Protein	A0A1V2GF16	Iron-sulfur cluster assembly scaffold protein IscU (Fragment) OS=Escherichia coli OX=562 GN=BXT93_12685 PE=3 SV=1	FALSE	25.672	46	5	6	5	127	13.7	4.93	16.02	5	1
High	Master Protein	A0A1X0YLD1	Porphobilinogen deaminase OS=Escherichia coli OX=562 GN=hemC PE=3 SV=1	FALSE	25.605	25	4	5	2	313	33.8	5.95	17.95	4	1
High	Master Protein	lcl	[locus_tag=EDL933_3687] [db_xref=GO:0005506,GO:0006118,GO:0009055] [protein=Ferredoxin, 2Fe-2S] [protein_id=AIG69847.1] [location=complement(3464294..3464629)] [gbkey=CDS]	FALSE	25.2	48	3	5	3	111	12.3	4.59	12.22	3	1
High	Master Protein	A0A3S4NPI3	50S ribosomal protein L16 OS=Escherichia coli OX=562 GN=rplP PE=3 SV=1	FALSE	25.114	35	3	4	3	125	13.9	10.86	11.88	3	1
High	Master Protein	A0A3Z6J8D5	LPS O-antigen chain length determinant protein WzzB OS=Escherichia coli OX=562 GN=wzzB PE=4 SV=1	FALSE	25.066	16	4	10	3	325	36.1	5.44	28.14	4	1
High	Master Protein	A0A3W2ZKX4	ATP synthase subunit delta OS=Escherichia coli OX=562 GN=atpH PE=3 SV=1	FALSE	24.876	37	4	4	4	177	19.4	5.02	12.03	4	1
High	Master Protein	A0A3Q0PAE6	DUF2511 domain-containing protein OS=Escherichia coli OX=562 GN=AJ318_02170 PE=4 SV=1	FALSE	24.864	52	3	7	3	113	12.4	7.94	16.11	3	1
High	Master Protein	A0A7L6Y0B1	4-hydroxy-tetrahydrodipicolinate synthase OS=Escherichia coli OX=562 GN=dapA PE=3 SV=1	FALSE	24.78	25	5	5	5	292	31.2	6.44	11.19	5	1
High	Master Protein	A0A7V7IW86	Cold shock-like protein CspE OS=Escherichia coli OX=562 GN=cspE PE=4 SV=1	FALSE	24.763	54	3	12	3	69	7.5	8.54	28.24	3	1
High	Master Protein	E9T8D0	Uncharacterized protein OS=Escherichia coli MS 117-3 OX=749539 GN=HMPREF9542_00004 PE=4 SV=1	FALSE	24.701	22	2	3	2	140	15.8	8.62	10.67	2	1
High	Master Protein	A0A7U8QQ57	Lipoprotein metalloprotease SslE OS=Escherichia coli O11 OX=1095705 GN=sslE PE=4 SV=1	FALSE	24.655	6	9	13	9	1521	167.3	5.07	28.01	9	1
High	Master Protein	A0A3L4RQS4	Adenine phosphoribosyltransferase OS=Escherichia coli OX=562 GN=apt PE=3 SV=1	FALSE	24.543	17	2	3	2	183	19.9	5.41	8.68	2	1
High	Master Protein	F4V713	30S ribosomal protein S13 OS=Escherichia coli TA280 OX=656444 GN=rpsM PE=3 SV=1	FALSE	24.524	35	3	4	3	118	13.1	10.78	12.07	3	1
High	Master Protein	A0A0K4TPZ8	DUF1471 domain-containing protein OS=Escherichia coli OX=562 GN=yahO PE=4 SV=1	FALSE	24.25	42	3	21	1	91	9.9	6.07	51.92	3	1
High	Master Protein	lcl	[locus_tag=EDL933_0755] [db_xref=GO:0003700] [protein=Ferric uptake regulation protein FUR] [protein_id=AIG66957.1] [location=complement(790001..790447)] [gbkey=CDS]	FALSE	23.898	33	4	6	4	148	16.8	6.11	13.36	4	1
High	Master Protein	A0A5M4JN89	Serum resistance lipoprotein Bor (Fragment) OS=Escherichia coli OX=562 GN=bor PE=4 SV=1	FALSE	23.85	81	3	13	1	57	6.1	5.02	23.25	3	1
High	Master Protein	A0A6M0PH57	ABC transporter substrate-binding protein OS=Escherichia coli OX=562 GN=G4V09_07440 PE=4 SV=1	FALSE	23.759	16	5	6	1	535	60.1	6.81	15.27	5	1
High	Master Protein	A0A7G6C9G7	DUF3251 domain-containing protein OS=Escherichia coli OX=562 GN=HS093_08375 PE=4 SV=1	FALSE	23.62	31	5	7	5	179	19.6	5.5	11.62	5	1
High	Master Protein	A0A6G4BUC6	Phosphoserine aminotransferase OS=Escherichia coli OX=562 GN=serC PE=3 SV=1	FALSE	23.534	19	5	6	5	362	39.8	5.74	14.07	5	1
High	Master Protein	WP_001228969.1	ATP-independent periplasmic protein-refolding chaperone Spy [Escherichia coli]	FALSE	23.531	33	5	8	5	161	18.1	9.66	18.5	5	1
High	Master Protein	A0A1M2J4G4	Cytochrome c nitrite reductase pentaheme subunit OS=Escherichia coli OX=562 GN=nrfB PE=4 SV=1	FALSE	23.329	46	6	11	6	188	20.6	7.87	12.17	6	1
High	Master Protein	A0A4D4ELT1	sn-glycerol-3-phosphate ABC transporter periplasmic binding protein OS=Escherichia coli OX=562 GN=ugpB PE=3 SV=1	FALSE	23.181	14	5	8	5	438	48.4	7.44	14.25	5	1
High	Master Protein	lcl	[locus_tag=EDL933_4521] [db_xref=GO:0003735,GO:0005622,GO:0005840,GO:0006412] [protein=LSU ribosomal protein L18p (L5e)] [protein_id=AIG70669.1] [location=complement(4267883..4268236)] [gbkey=CDS]	FALSE	23.141	47	5	7	5	117	12.8	10.42	15.35	5	1
High	Master Protein	B7MMQ3	Glyceraldehyde-3-phosphate dehydrogenase OS=Escherichia coli O45:K1 (strain S88 / ExPEC) OX=585035 GN=gapC PE=3 SV=1	FALSE	22.704	18	5	9	4	333	35.8	6.65	14.52	5	1
High	Master Protein	D3QN42	Serine hydroxymethyltransferase OS=Escherichia coli O55:H7 (strain CB9615 / EPEC) OX=701177 GN=glyA PE=3 SV=1	FALSE	22.435	14	5	5	5	417	45.3	6.6	14.85	5	1
High	Master Protein	F4TEG6	Universal stress protein F OS=Escherichia coli M718 OX=656419 GN=ECJG_04680 PE=3 SV=1	FALSE	22.26	21	3	5	3	168	18.4	6.42	14.96	3	1
High	Master Protein	A0A7U9B4S0	Phosphoheptose isomerase OS=Escherichia coli TA143 OX=656437 GN=ECMG_01349 PE=4 SV=1	FALSE	22.175	27	4	7	4	192	20.8	6.42	17.09	4	1
High	Master Protein	A0A2T1LPQ6	30S ribosomal protein S20 OS=Escherichia coli OX=562 GN=rpsT PE=3 SV=1	FALSE	22.053	36	4	11	4	87	9.7	11.18	19.27	4	1
High	Master Protein	A0A1X3IGL3	Phosphopentomutase OS=Escherichia coli E1114 OX=550691 GN=deoB PE=3 SV=1	FALSE	21.789	15	5	9	5	407	44.4	5.29	16.8	5	1
High	Master Protein	lcl	[locus_tag=EDL933_1538] [protein=Tellurium resistance protein TerD] [protein_id=AIG67728.1] [location=1502250..1502828] [gbkey=CDS]	FALSE	21.77	46	7	10	7	192	20.5	4.86	20.42	7	1
High	Master Protein	A0A3S4NJU3	Ribosome-recycling factor OS=Escherichia coli OX=562 GN=frr PE=3 SV=1	FALSE	21.724	36	6	6	6	185	20.6	6.89	12.66	6	1
High	Master Protein	A0A7U5MX18	F0F1 ATP synthase subunit gamma OS=Escherichia coli OX=562 GN=RM34_10990 PE=4 SV=1	FALSE	21.714	20	6	9	6	287	31.6	8.76	14.7	6	1
High	Master Protein	A0A080IX84	Uncharacterized protein OS=Escherichia coli 1-250-04_S3_C2 OX=1444163 GN=AC28_2212 PE=4 SV=1	FALSE	21.529	30	3	5	3	111	12.4	9.17	12.47	3	1
High	Master Protein	F4UXZ0	Fumarate reductase iron-sulfur subunit OS=Escherichia coli TA280 OX=656444 GN=ECNG_01233 PE=3 SV=1	FALSE	21.434	15	3	5	3	263	29.6	8.6	11.42	3	1
High	Master Protein	A0A1M2TW09	Trigger factor OS=Escherichia coli OX=562 GN=tig PE=3 SV=1	FALSE	21.026	15	5	5	5	432	48.1	4.86	12.31	5	1
High	Master Protein	A0A2W6Q121	Outer membrane lipoprotein Blc OS=Escherichia coli OX=562 GN=blc PE=3 SV=1	FALSE	20.999	32	6	10	6	177	19.8	8.41	15.66	6	1
High	Master Protein	sp	DHE3_BOVIN	TRUE	20.937	11	6	9	6	558	61.5	7.59	15.34	6	1
High	Master Protein	A0A0E0U195	Neutral zinc metallopeptidase OS=Escherichia coli UMNK88 OX=696406 GN=UMNK88_3070 PE=4 SV=1	FALSE	20.936	20	6	8	6	287	31.4	5.67	18.5	6	1
High	Master Protein	A0A1D7PJW8	O-antigen capsule outer membrane auxiliary protein export channel OS=Escherichia coli OX=562 GN=gfcE PE=3 SV=1	FALSE	20.936	20	6	7	6	386	42.6	6.4	13.72	6	1
High	Master Protein	A0A2I7QGY0	Lipoprotein OS=Escherichia coli OX=562 GN=ygiB PE=4 SV=1	FALSE	20.805	30	5	8	5	191	19.8	8.05	14.62	5	1
High	Master Protein	A0A660HH54	Glucose dehydrogenase OS=Escherichia coli OX=562 GN=A9X72_20650 PE=3 SV=1	FALSE	20.619	10	5	5	5	796	86.7	5.71	11.08	5	1
High	Master Protein	A0A5F1DLT9	Protein-export protein SecB OS=Escherichia coli OX=562 GN=secB PE=3 SV=1	FALSE	20.528	23	2	5	2	155	17.2	4.37	15.91	2	1
High	Master Protein	A0A0B0W3C1	Plasmid stabilization protein OS=Escherichia coli OX=562 GN=AC067_27030 PE=4 SV=1	FALSE	20.283	63	4	4	4	83	9.2	4.67	8.5	4	1
High	Master Protein	E1IKT7	4Fe-4S binding domain protein OS=Escherichia coli MS 145-7 OX=679204 GN=HMPREF9348_00720 PE=4 SV=1	FALSE	20.238	25	6	10	6	289	32.1	6.81	18.57	6	1
High	Master Protein	A0A0E0U0L3	NADH-quinone oxidoreductase OS=Escherichia coli UMNK88 OX=696406 GN=nuoG PE=3 SV=1	FALSE	19.893	7	4	4	4	908	100.3	6.25	8.99	4	1
High	Master Protein	A0A3W4JVV1	Uracil phosphoribosyltransferase OS=Escherichia coli OX=562 GN=upp PE=3 SV=1	FALSE	19.885	23	2	2	2	208	22.5	5.47	8.63	2	1
High	Master Protein	A0A376HZF3	Phosphocarrier protein Hpr OS=Escherichia coli OX=562 GN=ptsH PE=4 SV=1	FALSE	19.774	71	3	6	3	85	9.1	5.83	8.61	3	1
High	Master Protein	F4NE25	50S ribosomal protein L25 OS=Escherichia coli D9 OX=556266 GN=rplY PE=3 SV=1	FALSE	19.772	40	5	13	5	126	14.4	9.45	27.14	5	1
High	Master Protein	A0A4Q0CFD6	Class B acid phosphatase OS=Escherichia coli OX=562 GN=EQ830_09890 PE=3 SV=1	FALSE	19.686	31	5	7	5	237	26	7.43	9.14	5	1
High	Master Protein	A0A3W5Y4I8	DNA-directed RNA polymerase subunit beta OS=Escherichia coli OX=562 GN=rpoB PE=3 SV=1	FALSE	19.638	6	6	6	6	1342	150.6	5.26	11.84	6	1
High	Master Protein	A0A1X3JEQ5	Putative cytoplasmic protein OS=Escherichia coli H386 OX=656397 GN=ECVG_00360 PE=3 SV=1	FALSE	19.583	33	3	6	3	102	11.3	4.67	8.06	3	1
High	Master Protein	D8A9Q3	ATP-dependent 6-phosphofructokinase OS=Escherichia coli (strain MS 21-1) OX=749527 GN=pfkA PE=3 SV=1	FALSE	19.419	10	3	4	3	340	37.1	6.2	11	3	1
High	Master Protein	A0A193RQH9	Branched chain amino acid ABC transporter substrate-binding protein LivJ OS=Escherichia coli OX=562 GN=livJ PE=3 SV=1	FALSE	19.268	13	4	5	2	367	39	5.8	7.95	4	1
High	Master Protein	A0A7D4RNG1	Uncharacterized protein OS=Escherichia coli O10:H32 OX=2603836 GN=FVP48_24405 PE=4 SV=1	FALSE	19.232	23	2	3	2	180	18.6	4.88	12.42	2	1
High	Master Protein	H4LBB9	Thiol peroxidase OS=Escherichia coli DEC2E OX=868142 GN=tpx PE=3 SV=1	FALSE	19.201	38	4	4	4	168	17.8	5.24	12.62	4	1
High	Master Protein	A0A1X3KIH0	Single-stranded DNA-binding protein OS=Escherichia coli H605 OX=656410 GN=EATG_02228 PE=3 SV=1	FALSE	19	20	3	6	3	178	18.9	5.58	10.95	3	1
High	Master Protein	F4NKN4	Inorganic pyrophosphatase OS=Escherichia coli D9 OX=556266 GN=ppa PE=3 SV=1	FALSE	18.929	18	3	6	3	176	19.7	5.17	10.24	3	1
High	Master Protein	A0A4Q0BHZ6	Peptidoglycan lytic exotransglycosylase OS=Escherichia coli OX=562 GN=EQ823_03105 PE=3 SV=1	FALSE	18.911	8	6	8	6	645	73.3	8.78	15.2	6	1
High	Master Protein	F4VIF1	Putative metalloprotease YggG OS=Escherichia coli H591 OX=656408 GN=ECPG_04225 PE=3 SV=1	FALSE	18.698	22	5	7	5	294	31.8	7.31	13.57	5	1
High	Master Protein	E0IW66	DNA-specific endonuclease I OS=Escherichia coli (strain ATCC 9637 / CCM 2024 / DSM 1116 / LMG 11080 / NBRC 13500 / NCIMB 8666 / NRRL B-766 / W) OX=566546 GN=endA PE=3 SV=1	FALSE	18.595	22	4	8	4	235	26.6	8.95	15.98	4	1
High	Master Protein	sp	K2C1_HUMAN	TRUE	18.566	7	4	6	4	643	65.8	8.12	13.76	4	1
High	Master Protein	V0YEJ4	Ribosomal protein S16 (Fragment) OS=Escherichia coli 908525 OX=1268995 GN=HMPREF1608_00705 PE=4 SV=1	FALSE	18.398	61	3	7	3	57	6.3	8.73	10.47	3	1
High	Master Protein	sp	HBA_HUMAN	TRUE	18.262	19	2	9	2	141	15.1	8.68	11.14	2	1
High	Master Protein	A0A6M0PEZ2	Bifunctional glucose-1-phosphatase/inositol phosphatase OS=Escherichia coli OX=562 GN=agp PE=4 SV=1	FALSE	18.167	9	2	3	1	413	45.6	6.55	9.53	2	1
High	Master Protein	A0A4Q8IIU9	Peroxide/acid resistance protein YodD OS=Escherichia coli OX=562 GN=yodD PE=4 SV=1	FALSE	18.138	53	3	3	3	75	8.6	4.6	10.27	3	1
High	Master Protein	A0A0F3UR96	DUF333 domain-containing lipoprotein YoaF OS=Escherichia coli OX=562 GN=yoaF PE=4 SV=1	FALSE	18.076	38	2	4	2	84	8.9	7.78	9.17	2	1
High	Master Protein	Q8X5R7	Putative membrane protein OS=Escherichia coli O157:H7 OX=83334 GN=yhiI PE=4 SV=2	FALSE	17.991	15	4	4	4	355	38.8	6.86	11.02	4	1
High	Master Protein	F4NQL2	Uncharacterized protein OS=Escherichia coli D9 OX=556266 GN=SSJG_04480 PE=4 SV=1	FALSE	17.829	35	3	6	3	99	11.4	6.13	16.15	3	1
High	Master Protein	F4NG45	PQQ enzyme repeat protein OS=Escherichia coli D9 OX=556266 GN=SSJG_01123 PE=4 SV=1	FALSE	17.826	17	4	4	4	353	38.6	9.31	11.25	4	1
High	Master Protein	A0A6S5NEG0	DUF1471 domain-containing protein OS=Escherichia coli OX=562 GN=WP7S17E04_04660 PE=4 SV=1	FALSE	17.822	34	2	4	2	87	9.2	6	13.55	2	1
High	Master Protein	A0A0K4M2K3	2,3-bisphosphoglycerate-dependent phosphoglycerate mutase OS=Escherichia coli OX=562 GN=gpmA PE=3 SV=1	FALSE	17.807	23	5	7	5	250	28.6	6.18	12.43	5	1
High	Master Protein	A8A0Q4	Integration host factor subunit alpha OS=Escherichia coli O9:H4 (strain HS) OX=331112 GN=ihfA PE=3 SV=1	FALSE	17.515	29	3	6	3	99	11.4	9.35	15.12	3	1
High	Master Protein	A0A6M0PJ07	50S ribosomal protein L32 OS=Escherichia coli OX=562 GN=rpmF PE=3 SV=1	FALSE	17.438	44	2	4	2	57	6.4	11	10.02	2	1
High	Master Protein	A0A7X1T2I6	Autotransporter adhesin Ag43 (Fragment) OS=Escherichia coli OX=562 GN=ag43 PE=4 SV=1	FALSE	17.393	13	3	5	1	320	34.3	6.54	9.56	3	1
High	Master Protein	A0A330C3M0	Cell division protein FtsN OS=Escherichia coli OX=562 GN=ftsN PE=3 SV=1	FALSE	17.069	9	3	5	3	319	35.9	10.13	11.48	3	1
High	Master Protein	A0A5N3D5X6	Class I fructose-bisphosphate aldolase OS=Escherichia coli OX=562 GN=fbaB PE=4 SV=1	FALSE	17.024	13	4	5	3	350	38.1	6.73	7.8	4	1
High	Master Protein	A0A193LMJ4	Delta-aminolevulinic acid dehydratase OS=Escherichia coli OX=562 GN=GJ11_02270 PE=3 SV=1	FALSE	16.852	9	2	3	2	324	35.6	5.39	9.14	2	1
High	Master Protein	A0A4D3U7A0	30S ribosomal protein S8 OS=Escherichia coli OX=562 GN=rpsH PE=3 SV=1	FALSE	16.81	37	5	7	5	130	14.1	9.57	13.31	5	1
High	Master Protein	A0A2S8JRZ4	High-affinity branched-chain amino acid ABC transporter substrate-binding protein LivK OS=Escherichia coli OX=562 GN=livk PE=3 SV=1	FALSE	16.754	14	5	6	3	369	39.4	5.81	12.41	5	1
High	Master Protein	A0A069XHA6	Lipoprotein OS=Escherichia coli 3-373-03_S4_C2 OX=1444252 GN=nlpA PE=3 SV=1	FALSE	16.7	14	3	4	3	272	29.4	6.35	10.14	3	1
High	Master Protein	A0A4Y9WRS7	Adenylosuccinate synthetase OS=Escherichia coli OX=562 GN=purA PE=3 SV=1	FALSE	16.348	13	5	5	5	432	47.4	5.49	10.44	5	1
High	Master Protein	A0A780G936	Type IV secretion system protein VirB5 OS=Escherichia coli OX=562 GN=HH129_23745 PE=4 SV=1	FALSE	16.317	13	2	4	2	238	26.7	5.71	7.73	2	1
High	Master Protein	A0A7U9FZE9	Putative alpha helix protein (Fragment) OS=Escherichia coli TA143 OX=656437 GN=ECMG_00654 PE=4 SV=1	FALSE	16.31	37	4	8	4	98	11.6	9.36	10.96	4	1
High	Master Protein	sp	ALBU_HUMAN	TRUE	16.216	7	5	8	2	609	69.3	6.28	20.13	5	1
High	Master Protein	A0A0D8W4W2	Probable Fe(2+)-trafficking protein OS=Escherichia coli OX=562 GN=yggX PE=3 SV=1	FALSE	16.185	47	3	3	3	91	10.9	5.94	8.04	3	1
High	Master Protein	A0A3E1W016	Oxidative stress defense protein OS=Escherichia coli OX=562 GN=yggE PE=4 SV=1	FALSE	16.154	10	2	4	2	246	26.6	6.57	9.21	2	1
High	Master Protein	extdb	30S ribosomal protein S4 [Escherichia coli]	FALSE	16.148	25	4	4	4	206	23.5	10.05	10.08	4	1
High	Master Protein	Q8X9B0	Citrate synthase OS=Escherichia coli O157:H7 OX=83334 GN=gltA PE=3 SV=2	FALSE	16.053	9	3	4	3	427	47.9	6.62	11.32	3	1
High	Master Protein	A0A0L7AJ52	N-acetylmuramoyl-L-alanine amidase OS=Escherichia coli OX=562 GN=AC067_07645 PE=4 SV=1	FALSE	15.989	14	3	3	3	276	31	7.62	9	3	1
High	Master Protein	A0A403NLX1	Glutamate-1-semialdehyde 2,1-aminomutase OS=Escherichia coli OX=562 GN=hemL PE=3 SV=1	FALSE	15.866	11	4	5	4	426	45.3	4.93	9.68	4	1
High	Master Protein	A0A246P0W3	Citrate lyase alpha chain OS=Escherichia coli OX=562 GN=citF PE=4 SV=1	FALSE	15.849	7	2	2	2	510	55.2	6.54	3.31	2	1
High	Master Protein	WP_001138117.1	MULTISPECIES: 30S ribosomal protein S19 [Proteobacteria]	FALSE	15.558	48	3	6	2	92	10.4	10.52	4.63	3	1
High	Master Protein	A0A0H3EPS6	Uncharacterized protein OS=Escherichia coli O83:H1 (strain NRG 857C / AIEC) OX=685038 GN=NRG857_15415 PE=4 SV=1	FALSE	15.316	22	4	8	4	122	13.9	9.11	15.87	4	1
High	Master Protein	A0A5F1F8E3	Efflux pump membrane transporter OS=Escherichia coli OX=562 GN=CQB02_01505 PE=3 SV=1	FALSE	15.222	3	3	4	3	1037	111.9	5.91	10.39	3	1
High	Master Protein	J7QLE6	Uncharacterized protein OS=Escherichia coli chi7122 OX=475609 GN=b1550 PE=3 SV=1	FALSE	15.164	50	3	5	3	58	6.7	9	12.34	3	1
High	Master Protein	A0A5F1VCC7	Multifunctional acyl-CoA thioesterase I/protease I/lysophospholipase L1 OS=Escherichia coli OX=562 GN=tesA PE=4 SV=1	FALSE	15.113	20	3	5	3	210	23.9	7.58	8.27	3	1
High	Master Protein	A0A6L3D9R4	Uncharacterized protein (Fragment) OS=Escherichia coli OX=562 GN=EA239_25990 PE=4 SV=1	FALSE	15.103	32	2	2	2	110	12.1	5.26	8.75	2	1
High	Master Protein	A0A271UJE1	UPF0434 protein YcaR OS=Escherichia coli OX=562 GN=ycaR PE=3 SV=1	FALSE	15.018	57	3	4	3	60	6.8	5.01	6.33	3	1
High	Master Protein	A0A7D4MMA4	Cell division protein YtfB OS=Escherichia coli O10:H32 OX=2603836 GN=ytfB PE=4 SV=1	FALSE	14.869	20	2	3	2	212	23.5	5.22	7.88	2	1
High	Master Protein	A0A0K4G3F2	Peptidyl-prolyl cis-trans isomerase OS=Escherichia coli OX=562 GN=slyD PE=3 SV=1	FALSE	14.693	16	2	2	2	194	20.6	5.03	5.59	2	1
High	Master Protein	A0A1M2E1B5	UPF0325 protein YaeH OS=Escherichia coli OX=562 GN=yaeH PE=3 SV=1	FALSE	14.679	25	3	5	3	128	15.2	6.23	9.17	3	1
High	Master Protein	E9TLJ4	ROK family protein OS=Escherichia coli MS 117-3 OX=749539 GN=HMPREF9542_04708 PE=4 SV=1	FALSE	14.613	17	3	3	3	331	35.7	5.9	5.32	3	1
High	Master Protein	A0A5E9SFL9	Uncharacterized protein OS=Escherichia coli OX=562 GN=E2135_07295 PE=4 SV=1	FALSE	14.61	38	3	5	3	96	11	5.9	7.95	3	1
High	Master Protein	A0A090JLQ3	Gamma-glutamyltransferase OS=Escherichia coli OX=562 GN=ggt PE=4 SV=1	FALSE	14.604	8	3	3	3	580	61.7	5.6	5.62	3	1
High	Master Protein	A0A061KQV5	Mechanosensitive channel MscK OS=Escherichia coli OX=562 GN=mscK PE=3 SV=1	FALSE	14.553	2	2	4	2	1120	127.1	8.03	9.21	2	1
High	Master Protein	lcl	[locus_tag=EDL933_1147] [db_xref=GO:0003723,GO:0003743,GO:0006413] [protein=Translation initiation factor 1] [protein_id=AIG67342.1] [location=complement(1144634..1144852)] [gbkey=CDS]	FALSE	14.484	49	2	3	2	72	8.2	9.25	7.94	2	1
High	Master Protein	A0A1X3I9A4	YceB OS=Escherichia coli M056 OX=656415 GN=EAMG_00555 PE=4 SV=1	FALSE	14.458	25	3	3	3	205	22.6	5.94	10.28	3	1
High	Master Protein	A0A244BM86	Ferritin OS=Escherichia coli OX=562 GN=ftnA PE=3 SV=1	FALSE	14.37	14	2	4	2	165	19.4	4.83	7.64	2	1
High	Master Protein	A0A3W5XZJ5	Multidrug export protein EmrA OS=Escherichia coli OX=562 GN=EAN77_13470 PE=3 SV=1	FALSE	14.351	13	5	8	5	390	42.7	9.33	11.28	5	1
High	Master Protein	A0A3W5HAU9	DUF2498 family protein OS=Escherichia coli OX=562 GN=D6X76_12290 PE=4 SV=1	FALSE	14.277	46	2	2	2	83	9.4	5.73	7.22	2	1
High	Master Protein	A0A2W6Q516	Ribosome-binding membrane protein YqjD (Fragment) OS=Escherichia coli OX=562 GN=yqjD PE=4 SV=1	FALSE	14.068	31	2	2	2	78	8.8	7.42	7.29	2	1
High	Master Protein	WP_024222796.1	cellulose biosynthesis protein BcsG [Escherichia coli]	FALSE	13.913	9	4	5	4	559	62.1	6.47	12.74	4	1
High	Master Protein	A0A3K4K7L6	Fe(3+)-dicitrate ABC transporter substrate-binding protein FecB OS=Escherichia coli OX=562 GN=fecB PE=4 SV=1	FALSE	13.773	17	3	3	3	300	33.1	8.88	8.03	3	1
High	Master Protein	A0A070FBN0	Phosphoenolpyruvate carboxykinase (ATP) OS=Escherichia coli O128:H2 str. 2011C-3317 OX=1446581 GN=pckA PE=3 SV=1	FALSE	13.738	14	5	5	5	540	59.6	5.71	7.43	5	1
High	Master Protein	E0J5A8	AsmA domain-containing protein OS=Escherichia coli (strain ATCC 9637 / CCM 2024 / DSM 1116 / LMG 11080 / NBRC 13500 / NCIMB 8666 / NRRL B-766 / W) OX=566546 GN=yicH PE=4 SV=1	FALSE	13.47	8	4	4	4	569	62.2	6.02	5.22	4	1
High	Master Protein	B7N0N0	Uncharacterized protein OS=Escherichia coli O81 (strain ED1a) OX=585397 GN=yhdP PE=4 SV=1	FALSE	13.451	3	4	6	4	1266	138.9	5.57	6.18	4	1
High	Master Protein	B7MVE2	Uncharacterized protein OS=Escherichia coli O81 (strain ED1a) OX=585397 GN=ydhR PE=4 SV=1	FALSE	13.409	32	3	4	1	101	11.3	5.39	8.6	3	1
High	Master Protein	A0A5D1FIZ6	Porphobilinogen deaminase OS=Escherichia coli OX=562 GN=hemC PE=3 SV=1	FALSE	13.387	18	3	4	1	313	33.8	5.36	11.68	3	1
High	Master Protein	A0A5F1DX59	Transcription modulator YdgT OS=Escherichia coli OX=562 GN=ydgT PE=3 SV=1	FALSE	13.308	25	2	4	2	71	8.4	6.79	9.44	2	1
High	Master Protein	A0A792X3Q6	PhnA family protein OS=Escherichia coli OX=562 GN=APX88_03770 PE=3 SV=1	FALSE	13.254	40	4	5	4	111	12.3	5	12.36	4	1
High	Master Protein	A0A2B7PA07	Mcr-1.2_1_KX236309 OS=Escherichia coli OX=562 GN=cptA PE=4 SV=1	FALSE	13.247	7	4	4	4	577	66.6	7.39	7.41	4	1
High	Master Protein	A0A426P758	Uridine phosphorylase OS=Escherichia coli OX=562 GN=udp PE=3 SV=1	FALSE	13.2	19	4	5	4	254	27.2	6.43	10.84	4	1
High	Master Protein	A0A6C9TKU4	Hydrogenase large subunit OS=Escherichia coli OX=562 GN=hycE PE=4 SV=1	FALSE	13.079	9	3	4	3	569	65	6.6	7.79	3	1
High	Master Protein	U9YDG2	Uncharacterized protein OS=Escherichia coli 113290 OX=1268976 GN=HMPREF1589_03530 PE=4 SV=1	FALSE	13.074	12	2	5	1	192	21.8	6.06	11.66	2	1
High	Master Protein	Q0TJA7	3-hydroxydecanoyl-[acyl-carrier-protein] dehydratase OS=Escherichia coli O6:K15:H31 (strain 536 / UPEC) OX=362663 GN=fabA PE=3 SV=2	FALSE	12.987	20	3	6	3	172	19	6.02	12.44	3	1
High	Master Protein	A0A4T2QTJ4	Uncharacterized protein OS=Escherichia coli OX=562 GN=EYY34_01330 PE=4 SV=1	FALSE	12.972	15	2	3	2	158	17.7	5.55	9.98	2	1
High	Master Protein	A0A0B1JR34	Cation efflux system protein OS=Escherichia coli OX=562 GN=cusF_2 PE=4 SV=1	FALSE	12.953	24	2	3	2	110	12.2	8.48	6.86	2	1
High	Master Protein	A0A1X3KKM3	Inositol-1-monophosphatase OS=Escherichia coli H605 OX=656410 GN=EATG_02645 PE=3 SV=1	FALSE	12.911	18	4	6	4	267	29.1	6.96	7.26	4	1
High	Master Protein	lcl	[locus_tag=EDL933_5546] [db_xref=GO:0003735,GO:0005622,GO:0005840,GO:0006412] [protein=SSU ribosomal protein S18p, zinc-independent] [protein_id=AIG71685.1] [location=5328431..5328658] [gbkey=CDS]	FALSE	12.897	29	2	5	2	75	9	10.59	6.79	2	1
High	Master Protein	A0A0A0G2Q3	Asparagine--tRNA ligase OS=Escherichia coli OX=562 GN=asnS PE=3 SV=1	FALSE	12.865	9	3	4	3	466	52.5	5.31	3.11	3	1
High	Master Protein	WP_024222621.1	hypothetical protein [Escherichia coli]	FALSE	12.753	27	3	3	3	105	11.4	8.91	6.6	3	1
High	Master Protein	A0A0K4NM46	ATP-dependent Clp protease proteolytic subunit OS=Escherichia coli OX=562 GN=clpP PE=3 SV=1	FALSE	12.748	20	2	3	2	207	23.1	5.8	6.84	2	1
High	Master Protein	A0A1X3KQJ2	Protein TolA OS=Escherichia coli H605 OX=656410 GN=EATG_00511 PE=4 SV=1	FALSE	12.716	11	4	4	4	425	43.5	9.13	2.85	4	1
High	Master Protein	A0A7U4W490	3-ketoacyl-ACP reductase OS=Escherichia coli OX=562 GN=fabG PE=4 SV=1	FALSE	12.683	17	2	3	2	244	25.5	6.6	7.67	2	1
High	Master Protein	A0A0K9THN3	Peripla_BP_4 domain-containing protein OS=Escherichia coli M114 OX=656416 GN=ERYG_00719 PE=4 SV=1	FALSE	12.597	19	5	5	5	296	31.2	6.58	5.78	5	1
High	Master Protein	sp	K1C10_HUMAN	TRUE	12.567	7	4	5	4	593	59.5	5.21	8.81	4	1
High	Master Protein	A0A0F3UYM5	ABC transporter substrate-binding protein OS=Escherichia coli OX=562 GN=ytfQ PE=4 SV=1	FALSE	12.564	11	4	4	4	318	34.3	7.14	8.43	4	1
High	Master Protein	A0A6L2GQG2	RNA chaperone/antiterminator CspA (Fragment) OS=Escherichia coli OX=562 GN=cspA PE=4 SV=1	FALSE	12.489	35	2	5	2	63	6.8	5.95	12.08	2	1
High	Master Protein	A0A192CCN1	HtrG OS=Escherichia coli O25b:H4 OX=941280 GN=EWT55_06230 PE=4 SV=1	FALSE	12.427	11	2	3	2	206	23.2	9.31	5.36	2	1
High	Master Protein	D6JGR5	Uncharacterized protein OS=Escherichia coli B354 OX=550677 GN=ECEG_04110 PE=4 SV=1	FALSE	12.342	29	3	3	3	120	13.7	9.5	8.32	3	1
High	Master Protein	A0A7L7WRM1	DNA gyrase inhibitor YacG OS=Escherichia coli O15:H12 OX=2773704 GN=yacG PE=4 SV=1	FALSE	12.258	52	3	3	3	65	7.2	4.65	6.49	3	1
High	Master Protein	E1J6I8	Putative glucose-6-phosphate 1-epimerase OS=Escherichia coli MS 124-1 OX=679205 GN=HMPREF9347_02526 PE=3 SV=1	FALSE	12.154	11	2	3	2	301	33.5	6.4	3.71	2	1
High	Master Protein	A0A5B9S930	50S ribosomal protein L4 OS=Escherichia coli OX=562 GN=rplD PE=3 SV=1	FALSE	12.113	19	4	6	4	201	22.1	9.63	10.45	4	1
High	Master Protein	D6JGR4	Uncharacterized protein OS=Escherichia coli B354 OX=550677 GN=ECEG_04109 PE=4 SV=1	FALSE	12.103	33	2	3	2	69	8	9.09	7.29	2	1
High	Master Protein	A0A1M1NIW6	Metal-binding protein ZinT OS=Escherichia coli OX=562 GN=zinT PE=4 SV=1	FALSE	12.064	15	3	3	3	216	24.7	6.6	7.85	3	1
High	Master Protein	A0A140N4N0	Orotate phosphoribosyltransferase OS=Escherichia coli (strain B / BL21-DE3) OX=469008 GN=pyrE PE=3 SV=1	FALSE	12.057	27	3	3	3	213	23.6	5.48	4.47	3	1
High	Master Protein	A0A6C9QFZ1	30S ribosomal protein S12 OS=Escherichia coli OX=562 GN=rpsL PE=3 SV=1	FALSE	12.056	30	4	5	4	124	13.7	10.87	7.75	4	1
High	Master Protein	A0A383FFP3	UDP-galactose 4-epimerase OS=Escherichia coli OX=562 GN=fnl1 PE=3 SV=1	FALSE	11.951	12	3	3	3	344	38.5	6.96	5.4	3	1
High	Master Protein	E1JEP9	Acyl carrier protein OS=Escherichia coli MS 124-1 OX=679205 GN=acpP PE=3 SV=1	FALSE	11.95	30	2	3	2	83	9.6	4.7	7.31	2	1
High	Master Protein	A0A3W5XZT5	Dimethylsulfoxide reductase subunit A OS=Escherichia coli OX=562 GN=EAN77_13950 PE=3 SV=1	FALSE	11.906	7	4	4	4	814	90.4	6.93	4.96	4	1
High	Master Protein	sp	HBB_HUMAN	TRUE	11.901	13	2	5	2	146	15.9	7.28	15.24	2	1
High	Master Protein	A0A271R4N6	Uncharacterized lipoprotein YifL OS=Escherichia coli OX=562 GN=BIZ41_08775 PE=4 SV=1	FALSE	11.878	45	2	7	2	67	7.2	8.79	9.5	2	1
High	Master Protein	V8K354	N-acetylmuramoyl-L-alanine amidase OS=Escherichia coli LAU-EC10 OX=1417796 GN=V415_20620 PE=4 SV=1	FALSE	11.796	15	4	6	4	289	31.4	10.13	15.05	4	1
High	Master Protein	A0A6G3HMN6	AsmA family protein (Fragment) OS=Escherichia coli OX=562 GN=GUC61_22770 PE=4 SV=1	FALSE	11.634	11	4	4	4	440	48.4	7.62	4.58	4	1
High	Master Protein	A0A3W5XUZ2	Signal peptidase I OS=Escherichia coli OX=562 GN=EAN77_05305 PE=3 SV=1	FALSE	11.618	13	5	7	5	324	35.9	7.33	12.27	5	1
High	Master Protein	A0A2Y0I3R9	Metalloprotease OS=Escherichia coli OX=562 GN=DTL43_10200 PE=3 SV=1	FALSE	11.493	15	3	3	3	254	26.7	8.51	4.57	3	1
High	Master Protein	A0A0J2BD99	Cell division protein DedD OS=Escherichia coli OX=562 GN=dedD PE=3 SV=1	FALSE	11.412	19	4	5	4	216	22.5	8.22	6.8	4	1
High	Master Protein	A0A5P1Q7E6	Autoinducer 2-binding protein LsrB OS=Escherichia coli OX=562 GN=lsrB PE=3 SV=1	FALSE	11.293	12	3	4	3	340	36.7	7.27	6.49	3	1
High	Master Protein	A0A3W3CR84	AcfC family adhesin Paa OS=Escherichia coli OX=562 GN=paa PE=4 SV=1	FALSE	11.214	12	2	2	2	252	27.7	6.38	6.3	2	1
High	Master Protein	D7Y521	Polyribonucleotide nucleotidyltransferase OS=Escherichia coli (strain MS 115-1) OX=749537 GN=pnp PE=3 SV=1	FALSE	11.21	7	4	6	4	734	79.8	5.53	4.21	4	1
High	Master Protein	A0A3R1B5L7	Protein translocase subunit SecD OS=Escherichia coli OX=562 GN=secD PE=3 SV=1	FALSE	11.195	7	4	5	3	615	66.6	8.92	4.57	4	1
High	Master Protein	A0A0K4QZI9	UPF0438 protein YifE OS=Escherichia coli OX=562 GN=yifE PE=3 SV=1	FALSE	11.101	29	3	4	3	112	13.1	6.55	6.56	3	1
High	Master Protein	A0A4S1NYV6	Phosphoglucosamine mutase OS=Escherichia coli OX=562 GN=glmM PE=3 SV=1	FALSE	11.015	10	3	5	3	445	47.5	6.02	7.8	3	1
High	Master Protein	A0A2A2XEG6	Antitoxin OS=Escherichia coli OX=562 GN=D9K54_10225 PE=3 SV=1	FALSE	10.923	53	2	2	2	73	8.2	5.11	5.33	2	1
High	Master Protein	lcl	[locus_tag=EDL933_4533] [db_xref=GO:0003735,GO:0005622,GO:0005840,GO:0006412] [protein=SSU ribosomal protein S19p (S15e)] [protein_id=AIG70681.1] [location=complement(4272887..4273036)] [gbkey=CDS]	FALSE	10.888	55	2	4	1	49	5.4	10.11	2.13	2	1
High	Master Protein	A0A3T7K731	D-alanyl-D-alanine carboxypeptidase OS=Escherichia coli OX=562 GN=DL473_05260 PE=3 SV=1	FALSE	10.863	8	3	5	3	477	51.7	8.63	6.15	3	1
High	Master Protein	A0A6L2GIB8	Bacterioferritin (Fragment) OS=Escherichia coli OX=562 GN=bfr PE=3 SV=1	FALSE	10.834	18	2	2	2	151	17.6	4.67	5.51	2	1
High	Master Protein	A0A4Q0CGW3	Oxidoreductase OS=Escherichia coli OX=562 GN=EQ830_06910 PE=4 SV=1	FALSE	10.812	11	3	3	3	345	38.7	6.29	2.86	3	1
High	Master Protein	A0A6C9SXR7	Inosine-5'-monophosphate dehydrogenase (Fragment) OS=Escherichia coli OX=562 GN=guaB PE=3 SV=1	FALSE	10.648	12	3	3	3	379	40.1	6.28	6.4	3	1
High	Master Protein	A0A6M7GX12	Universal stress protein OS=Escherichia coli O157:H7 OX=83334 GN=uspA PE=3 SV=1	FALSE	10.626	9	1	4	1	144	16	5.29	8.39	1	1
High	Master Protein	A0A6M0PNV1	Xanthine-guanine phosphoribosyltransferase OS=Escherichia coli OX=562 GN=gpt PE=3 SV=1	FALSE	10.597	16	1	1	1	152	16.9	5.85	5.55	1	1
High	Master Protein	B6IB69	Ion-translocating oxidoreductase complex subunit G OS=Escherichia coli (strain SE11) OX=409438 GN=rsxG PE=3 SV=1	FALSE	10.593	20	4	4	4	206	21.9	7.11	8.1	4	1
High	Master Protein	B7MLN2	Autotransporter assembly factor TamA OS=Escherichia coli O45:K1 (strain S88 / ExPEC) OX=585035 GN=ytfM PE=3 SV=1	FALSE	10.575	11	5	5	5	577	64.8	8.65	5.79	5	1
High	Master Protein	A0A037YD53	4Fe-4S binding domain protein OS=Escherichia coli OX=562 GN=FORC82_2245 PE=4 SV=1	FALSE	10.474	19	2	2	2	184	20.8	7.68	4.88	2	1
High	Master Protein	A0A6M0Q077	2-iminobutanoate/2-iminopropanoate deaminase OS=Escherichia coli OX=562 GN=ridA PE=3 SV=1	FALSE	10.465	34	2	6	1	128	13.7	5.21	7.48	2	1
High	Master Protein	A0A6M0PU82	Sulfate ABC transporter substrate-binding protein OS=Escherichia coli OX=562 GN=G4V03_04595 PE=4 SV=1	FALSE	10.453	13	4	6	2	334	37.1	8.59	14.66	4	1
High	Master Protein	A0A7M3D646	Stringent starvation protein A OS=Escherichia coli OX=562 GN=EPS70_03125 PE=3 SV=1	FALSE	10.425	11	2	3	2	212	24.3	5.49	5.83	2	1
High	Master Protein	A0A6L9ABF8	Flagellin (Fragment) OS=Escherichia coli OX=562 GN=GUC01_27905 PE=3 SV=1	FALSE	10.338	8	2	4	2	520	53	4.94	6.54	2	1
High	Master Protein	A0A7A0MX38	Cytochrome c nitrite reductase Fe-S protein OS=Escherichia coli OX=562 GN=nrfC PE=4 SV=1	FALSE	10.326	13	2	2	2	223	24.6	8.63	4.98	2	1
High	Master Protein	A0A6N4P1R5	Protein YdjY OS=Escherichia coli OX=562 GN=ydjY PE=4 SV=1	FALSE	10.211	21	3	3	3	225	24.1	6.99	5.52	3	1
High	Master Protein	A0A5C8XMP2	Tyrosine--tRNA ligase OS=Escherichia coli OX=562 GN=tyrS PE=3 SV=1	FALSE	10.177	6	2	2	2	424	47.6	5.81	5.7	2	1
High	Master Protein	A0A3Y4Y005	50S ribosomal protein L28 OS=Escherichia coli OX=562 GN=rpmB PE=3 SV=1	FALSE	10.154	32	3	4	3	78	9	11.41	9.11	3	1
High	Master Protein	A0A454RLU9	50S ribosomal protein L15 OS=Escherichia coli OX=562 GN=rplO PE=3 SV=1	FALSE	10.126	18	2	3	2	144	15	11.18	2.52	2	1
High	Master Protein	sp	TRYP_PIG	TRUE	10.098	12	2	3	2	231	24.4	7.18	7.42	2	1
High	Master Protein	A0A3L4XQN0	Galactose-1-phosphate uridylyltransferase OS=Escherichia coli OX=562 GN=galT PE=3 SV=1	FALSE	9.954	10	3	3	3	348	39.6	6.42	3.3	3	1
High	Master Protein	A0A1X3KTL3	50S ribosomal protein L27 OS=Escherichia coli H605 OX=656410 GN=rpmA PE=3 SV=1	FALSE	9.903	25	2	3	2	85	9.1	10.58	7.15	2	1
High	Master Protein	A0A3T8K3Z8	Beta-lactamase OS=Escherichia coli OX=562 GN=DM962_29790 PE=3 SV=1	FALSE	9.848	11	3	4	3	377	41.5	8.81	7.48	3	1
High	Master Protein	B7MTP2	DUF1471 domain-containing protein OS=Escherichia coli O81 (strain ED1a) OX=585397 GN=ycfR PE=4 SV=1	FALSE	9.833	47	2	2	2	85	8.8	8.54	3.52	2	1
High	Master Protein	A0A3S7C1Q9	ABC transporter substrate-binding protein OS=Escherichia coli OX=562 GN=E5S34_09495 PE=4 SV=1	FALSE	9.795	6	2	3	2	388	42.8	7.3	6.19	2	1
High	Master Protein	A0A1X9TN23	Glutaredoxin OS=Escherichia coli OX=562 GN=grxD PE=3 SV=1	FALSE	9.771	22	2	2	2	115	12.9	4.75	5.7	2	1
High	Master Protein	A0A3Y4XXU7	UPF0181 protein YoaH OS=Escherichia coli OX=562 GN=yoaH PE=3 SV=1	FALSE	9.759	39	1	1	1	59	6.6	4.65	4.23	1	1
High	Master Protein	C3SYS2	Uncharacterized protein OS=Escherichia coli OX=562 GN=ECs3465 PE=4 SV=1	FALSE	9.749	23	2	2	2	134	14.8	5.97	2.12	2	1
High	Master Protein	D3GY01	Putative glycoprotein/receptor OS=Escherichia coli O44:H18 (strain 042 / EAEC) OX=216592 GN=EC042_4857 PE=4 SV=1	FALSE	9.679	15	2	2	2	165	17.5	5.53	5.52	2	1
High	Master Protein	A0A4C4Z815	Fimbrial-like adhesin protein OS=Escherichia coli OX=562 GN=ydeQ PE=4 SV=1	FALSE	9.607	5	1	1	1	304	32.1	7.77	3.93	1	1
High	Master Protein	A0A3R1AGM6	Uridylate kinase OS=Escherichia coli OX=562 GN=pyrH PE=3 SV=1	FALSE	9.595	9	2	3	2	241	26	8.38	4.24	2	1
High	Master Protein	A0A6M0PMN6	Class I fructose-bisphosphate aldolase OS=Escherichia coli OX=562 GN=fbaB PE=4 SV=1	FALSE	9.591	6	2	3	1	350	38	6.54	4.63	2	1
High	Master Protein	A0A5F1E0X3	Cytidine deaminase OS=Escherichia coli OX=562 GN=cdd PE=3 SV=1	FALSE	9.579	10	2	3	2	294	31.5	5.73	4.52	2	1
High	Master Protein	A0A3W5XSN4	Stress response protein ElaB OS=Escherichia coli OX=562 GN=elaB PE=3 SV=1	FALSE	9.378	25	3	3	3	101	11.3	5.57	7.52	3	1
High	Master Protein	A0A5C9AHF4	Met regulon regulatory protein MetJ (Fragment) OS=Escherichia coli OX=562 GN=metJ PE=3 SV=1	FALSE	9.294	20	1	1	1	87	10	6.3	4.3	1	1
High	Master Protein	B7MU70	Protein TonB OS=Escherichia coli O81 (strain ED1a) OX=585397 GN=ECED1_1438 PE=3 SV=1	FALSE	9.228	13	1	3	1	113	12.8	9.83	7.86	1	1
High	Master Protein	A0A0K9TI26	Iron-sulfur cluster insertion protein ErpA OS=Escherichia coli M114 OX=656416 GN=erpA PE=3 SV=1	FALSE	9.143	18	2	3	2	114	12.1	4.31	4.04	2	1
High	Master Protein	F4NEE0	Multidrug resistance protein MdtA OS=Escherichia coli D9 OX=556266 GN=mdtA PE=2 SV=1	FALSE	9.041	6	2	2	2	464	50.3	8.32	6.33	2	1
High	Master Protein	A0A426PE29	YnbE family lipoprotein OS=Escherichia coli OX=562 GN=AWF59_021725 PE=4 SV=1	FALSE	8.996	17	3	3	3	172	19.2	7.14	4.89	3	1
High	Master Protein	G8GYG3	Acetyltransferase OS=Escherichia coli OX=562 GN=eex PE=4 SV=1	FALSE	8.933	25	2	5	2	71	8.1	7.08	9.14	2	1
High	Master Protein	D7Y6X3	Peptidoglycan D,D-transpeptidase FtsI OS=Escherichia coli (strain MS 115-1) OX=749537 GN=ftsI PE=3 SV=1	FALSE	8.931	4	2	3	2	588	63.9	9.64	5.58	2	1
High	Master Protein	D3H492	Pyruvate dehydrogenase E1 component OS=Escherichia coli O44:H18 (strain 042 / EAEC) OX=216592 GN=aceE PE=4 SV=1	FALSE	8.914	3	3	3	3	887	99.6	5.68	4.92	3	1
High	Master Protein	A0A3F3P2Q7	7-alpha-hydroxysteroid dehydrogenase OS=Escherichia coli OX=562 GN=DTL90_11050 PE=4 SV=1	FALSE	8.904	10	2	4	2	255	26.8	5.4	10.13	2	1
High	Master Protein	A0A3L5H4Z8	Miniconductance mechanosensitive channel MscM OS=Escherichia coli OX=562 GN=mscM PE=3 SV=1	FALSE	8.899	1	1	2	1	1107	123.9	6.83	3.75	1	1
High	Master Protein	A0A2A3V795	MOSC domain-containing protein OS=Escherichia coli OX=562 GN=COD46_16450 PE=4 SV=1	FALSE	8.858	15	3	4	3	224	25.4	6.23	4.32	3	1
High	Master Protein	A0A0B1N352	Aldoketomutase (Fragment) OS=Escherichia coli OX=562 GN=PU06_10150 PE=3 SV=1	FALSE	8.846	17	2	2	2	134	14.6	4.74	6.12	2	1
High	Master Protein	sp	PRDX1_HUMAN	TRUE	8.704	15	3	4	3	199	22.1	8.13	5.68	3	1
High	Master Protein	B7USS5	Uncharacterized protein OS=Escherichia coli O127:H6 (strain E2348/69 / EPEC) OX=574521 GN=yecJ PE=4 SV=1	FALSE	8.689	18	1	1	1	83	9.2	5.33	3.98	1	1
High	Master Protein	A0A3W5RUW1	Tellurium resistance protein TerE OS=Escherichia coli OX=562 GN=terE PE=4 SV=1	FALSE	8.681	14	2	3	2	191	20.4	4.87	0	2	1
High	Master Protein	A0A0H3PV24	Glucans biosynthesis protein D OS=Escherichia coli O157:H7 (strain EC869) OX=478008 GN=mdoD PE=3 SV=1	FALSE	8.592	5	2	2	2	539	61.3	5.97	5.82	2	1
High	Master Protein	B7N0G8	NADPH quinone reductase OS=Escherichia coli O81 (strain ED1a) OX=585397 GN=mdaB PE=4 SV=1	FALSE	8.5	16	2	2	2	193	21.9	6.11	4.87	2	1
High	Master Protein	A0A6M0PEQ6	50S ribosomal protein L2 OS=Escherichia coli OX=562 GN=rplB PE=3 SV=1	FALSE	8.479	17	4	4	4	273	29.8	10.93	6.56	4	1
High	Master Protein	A0A1X3K9N5	Periplasmic protein CpxP OS=Escherichia coli H605 OX=656410 GN=EATG_03936 PE=3 SV=1	FALSE	8.47	8	1	2	1	167	19	6.96	4.5	1	1
High	Master Protein	A0A0K3YW62	Hydrogenase-2 large subunit OS=Escherichia coli OX=562 GN=hybC PE=3 SV=1	FALSE	8.459	8	2	2	2	567	62.5	6.28	3.42	2	1
High	Master Protein	A0A1X3KRR8	Endolytic murein transglycosylase OS=Escherichia coli H605 OX=656410 GN=mltG PE=3 SV=1	FALSE	8.406	7	2	3	2	340	38.3	9.42	0	2	1
High	Master Protein	A0A0K3S386	30S ribosomal protein S22 OS=Escherichia coli OX=562 GN=rpsV PE=3 SV=1	FALSE	8.296	58	4	6	4	45	5.1	11.5	12.47	4	1
High	Master Protein	sp	GSTA1_HUMAN	TRUE	8.16	4	1	2	1	221	25.5	8.88	5.25	1	1
High	Master Protein	A0A3J1PE54	5'-methylthioadenosine/S-adenosylhomocysteine nucleosidase OS=Escherichia coli OX=562 GN=mtnN PE=3 SV=1	FALSE	8.144	12	2	3	2	232	24.4	5.25	2.89	2	1
High	Master Protein	A0A1X3LJP0	Serine protease OS=Escherichia coli TA054 OX=656433 GN=EAXG_01100 PE=3 SV=1	FALSE	8.112	10	3	3	3	273	29.2	6.16	6.41	3	1
High	Master Protein	A0A4Q0E762	Purine nucleoside phosphoramidase OS=Escherichia coli OX=562 GN=EO241_06825 PE=4 SV=1	FALSE	8.092	14	1	2	1	119	13.2	6.18	5.92	1	1
High	Master Protein	A0A5C9AJ78	30S ribosomal protein S21 (Fragment) OS=Escherichia coli OX=562 GN=rpsU PE=1 SV=1	FALSE	8.031	32	3	6	3	62	7.3	10.98	12.4	3	1
High	Master Protein	A0A0J2E4G9	Glycine dehydrogenase (decarboxylating) OS=Escherichia coli OX=562 GN=gcvP PE=3 SV=1	FALSE	8.023	3	2	2	2	957	104.3	6	5.56	2	1
High	Master Protein	D6JBH6	UPF0033 domain-containing protein OS=Escherichia coli B354 OX=550677 GN=ECEG_01246 PE=3 SV=1	FALSE	8.01	30	1	1	1	77	8.6	4.83	3.94	1	1
High	Master Protein	A0A0H2YWZ1	Ferrienterobactin receptor OS=Escherichia coli O1:K1 / APEC OX=405955 GN=fepA PE=3 SV=1	FALSE	7.891	5	2	2	2	668	73.6	5.36	5.11	2	1
High	Master Protein	A0A168SDC4	Conjugal transfer protein OS=Escherichia coli OX=562 GN=BvCmsKSP024_04657 PE=4 SV=1	FALSE	7.849	18	2	3	2	101	10.8	9.89	4.63	2	1
High	Master Protein	Q0TDT9	Ribose-5-phosphate isomerase A OS=Escherichia coli O6:K15:H31 (strain 536 / UPEC) OX=362663 GN=rpiA PE=3 SV=1	FALSE	7.8	10	2	2	2	231	24.6	6.8	5.32	2	1
High	Master Protein	A0A3K2YD27	Dihydroorotate dehydrogenase (quinone) OS=Escherichia coli OX=562 GN=pyrD PE=3 SV=1	FALSE	7.746	10	2	2	2	336	36.8	7.84	2.59	2	1
High	Master Protein	G0FCV8	Diheme cytochrome c NapB OS=Escherichia coli UMNF18 OX=1050617 GN=UMNF18_2820 PE=3 SV=1	FALSE	7.695	15	2	3	2	134	14.5	7.37	4.91	2	1
High	Master Protein	A0A0A0F9S9	Uncharacterized protein OS=Escherichia coli G3/10 OX=1455601 GN=EL76_3429 PE=4 SV=1	FALSE	7.68	14	2	4	2	160	18.8	5.2	5.27	2	1
High	Master Protein	A0A3Q9VVK9	TerB OS=Escherichia coli O157 OX=1045010 GN=terB PE=4 SV=1	FALSE	7.502	13	2	3	2	151	16.7	5.43	5.88	2	1
High	Master Protein	A0A6C9SP06	Stress-induced protein OS=Escherichia coli OX=562 GN=GKG31_04665 PE=4 SV=1	FALSE	7.47	35	2	4	2	57	5.8	9.61	4.48	2	1
High	Master Protein	A0A1Q4PGW7	C-type lysozyme inhibitor OS=Escherichia coli OX=562 GN=BMT49_10755 PE=4 SV=1	FALSE	7.463	26	2	2	2	109	12.6	8.16	3.05	2	1
High	Master Protein	sp	RS27A_HUMAN	TRUE	7.412	16	2	2	2	156	18	9.64	4.2	2	1
High	Master Protein	D6I5T1	Alkyl hydroperoxide reductase subunit F OS=Escherichia coli B185 OX=550676 GN=ECDG_00452 PE=3 SV=1	FALSE	7.36	5	2	2	2	531	57.4	5.8	1.89	2	1
High	Master Protein	A0A4D4EJE5	Sugar-specific enzyme IIA component of PTS OS=Escherichia coli OX=562 GN=ptsN PE=4 SV=1	FALSE	7.342	10	1	1	1	163	18	5.86	2.93	1	1
High	Master Protein	A0A1E5MDA8	Uncharacterized protein OS=Escherichia coli OX=562 GN=A9R57_24145 PE=4 SV=1	FALSE	7.239	25	1	1	1	59	7	9.98	3.18	1	1
High	Master Protein	A0A3R1A351	Carbonic anhydrase OS=Escherichia coli OX=562 GN=D4U49_06170 PE=3 SV=1	FALSE	7.215	6	1	1	1	220	25.1	6.65	3.47	1	1
High	Master Protein	A0A5B7KWF8	UPF0304 protein YfbU OS=Escherichia coli OX=562 GN=yfbU PE=3 SV=1	FALSE	7.199	22	4	4	4	164	19.6	6.52	4.35	4	1
High	Master Protein	A0A234Y764	Lipoprotein YgeR OS=Escherichia coli OX=562 GN=DMZ30_12905 PE=4 SV=1	FALSE	7.18	6	1	1	1	251	26.6	10.11	3.11	1	1
High	Master Protein	A0A073V4J6	Bacterial extracellular solute-binding s, 5 Middle family protein OS=Escherichia coli 5-366-08_S1_C1 OX=1444047 GN=AB08_2715 PE=3 SV=1	FALSE	7.145	7	4	4	4	539	60.6	7.11	4.42	4	1
High	Master Protein	F4T186	Histidinol dehydrogenase OS=Escherichia coli M605 OX=656417 GN=hisD PE=3 SV=1	FALSE	7.116	4	1	1	1	437	46.5	5.06	3.31	1	1
High	Master Protein	A0A7U8QNH6	ACP S-malonyltransferase OS=Escherichia coli O11 OX=1095705 GN=fabD PE=4 SV=1	FALSE	6.904	8	2	2	2	309	32.4	5.03	5.1	2	1
High	Master Protein	A0A3H8WD59	YceK/YidQ family lipoprotein OS=Escherichia coli OX=562 GN=C9E63_00290 PE=4 SV=1	FALSE	6.891	29	2	2	2	110	11.8	5.86	2.7	2	1
High	Master Protein	D6IDP2	Lipoprotein yghG OS=Escherichia coli B185 OX=550676 GN=ECDG_03164 PE=4 SV=1	FALSE	6.818	13	1	1	1	136	14.6	9.39	3.68	1	1
High	Master Protein	WP_024203682.1	MULTISPECIES: hypothetical protein [Escherichia]	FALSE	6.799	21	2	2	2	115	12.8	6.51	2.25	2	1
High	Master Protein	E1IZ05	Uncharacterized protein OS=Escherichia coli MS 145-7 OX=679204 GN=HMPREF9348_05474 PE=4 SV=1	FALSE	6.786	8	1	2	1	114	13.4	8.72	1.94	1	1
High	Master Protein	A0A1X3KQF3	Flavodoxin OS=Escherichia coli H605 OX=656410 GN=EATG_00454 PE=3 SV=1	FALSE	6.758	12	1	1	1	215	24.3	4.49	3.75	1	1
High	Master Protein	A0A3Y3VB17	EexN family lipoprotein OS=Escherichia coli OX=562 GN=BMA87_22515 PE=4 SV=1	FALSE	6.748	31	3	3	3	94	11.1	8.25	3.17	3	1
High	Master Protein	A0A5F1DZR0	DUF1480 domain-containing protein OS=Escherichia coli OX=562 GN=CQB02_07115 PE=4 SV=1	FALSE	6.732	24	1	1	1	78	8.7	4.81	4.11	1	1
High	Master Protein	G0FHC9	Toxin-antitoxin system, antitoxin protein HicB OS=Escherichia coli UMNF18 OX=1050617 GN=hicB PE=4 SV=1	FALSE	6.691	16	1	1	1	115	13.1	5.02	2.73	1	1
High	Master Protein	A0A2J1DCX0	Esterase family protein OS=Escherichia coli OX=562 GN=yieL PE=4 SV=1	FALSE	6.668	3	1	2	1	389	42.7	6.67	4.78	1	1
High	Master Protein	A0A7I8ZXM2	YobA protein OS=Escherichia coli OX=562 GN=yobA PE=3 SV=1	FALSE	6.644	15	2	2	2	124	13.4	9.48	4.98	2	1
High	Master Protein	V0SFB7	Putative multiple stress resistance protein BhsA OS=Escherichia coli 907672 OX=1268982 GN=HMPREF1595_03423 PE=4 SV=1	FALSE	6.635	21	1	1	1	86	8.6	8.5	3.64	1	1
High	Master Protein	A0A1X3KKI1	Arsenate reductase OS=Escherichia coli H605 OX=656410 GN=EATG_02602 PE=3 SV=1	FALSE	6.558	19	1	1	1	119	13.5	5.6	3.43	1	1
High	Master Protein	A0A0K3ZGV6	Putative DNA uptake protein OS=Escherichia coli OX=562 GN=ERS085386_01153 PE=4 SV=1	FALSE	6.544	11	1	2	1	123	12.7	8.69	5.08	1	1
High	Master Protein	A0A7L5L3B6	Fe/S biogenesis protein NfuA OS=Escherichia coli OX=562 GN=nfuA PE=3 SV=1	FALSE	6.515	12	2	2	2	191	21	4.64	4.64	2	1
High	Master Protein	F4T3S2	UPF0125 protein ECIG_01194 OS=Escherichia coli M605 OX=656417 GN=ECIG_01194 PE=3 SV=1	FALSE	6.482	22	2	2	2	118	13.5	9.47	2.7	2	1
High	Master Protein	A0A0K4I1C1	Lipoprotein NlpI OS=Escherichia coli OX=562 GN=nlpI PE=4 SV=1	FALSE	6.434	8	2	2	2	294	33.6	4.78	5.88	2	1
High	Master Protein	A0A1X3LPY6	Outer membrane lipoprotein carrier protein LolA OS=Escherichia coli TA249 OX=656441 GN=EAZG_04281 PE=4 SV=1	FALSE	6.397	15	2	2	2	201	23.2	5.95	4.73	2	1
High	Master Protein	A0A4T5FZY6	Uncharacterized protein OS=Escherichia coli OX=562 GN=BvCmsNSP006_00291 PE=4 SV=1	FALSE	6.375	15	1	1	1	74	8.6	5.16	2.71	1	1
High	Master Protein	A0A0J2CZD0	Conjugal transfer protein TraF OS=Escherichia coli OX=562 GN=BvCmsHHP056_02267 PE=4 SV=1	FALSE	6.244	3	1	1	1	399	43	5.36	3.1	1	1
High	Master Protein	A0A377C5Z7	Murein hydrolase B OS=Escherichia coli OX=562 GN=mltB PE=4 SV=1	FALSE	6.177	10	3	3	2	269	30	9.66	4.47	3	1
High	Master Protein	A0A1L4J1G4	Quinol monooxygenase OS=Escherichia coli OX=562 GN=RG28_19985 PE=4 SV=1	FALSE	6.141	15	2	3	2	104	11.5	6.24	6.61	2	1
High	Master Protein	A0A0A1AAR8	DUF1496 domain-containing protein OS=Escherichia coli OX=562 GN=ynjH PE=4 SV=1	FALSE	6.09	22	2	2	2	90	9.9	6.49	4.73	2	1
High	Master Protein	A0A4S1VEP3	NADH-quinone oxidoreductase subunit C/D OS=Escherichia coli OX=562 GN=nuoC PE=3 SV=1	FALSE	6.062	4	2	2	2	600	68.7	6.51	2.05	2	1
High	Master Protein	A0A0L6XXZ7	3'(2'),5'-bisphosphate nucleotidase CysQ OS=Escherichia coli OX=562 GN=cysQ PE=3 SV=1	FALSE	6.06	9	1	1	1	246	27.2	5.96	3.29	1	1
High	Master Protein	A0A5F1DNL5	Vitamin B12-binding protein OS=Escherichia coli OX=562 GN=btuF PE=3 SV=1	FALSE	6.049	9	2	2	2	266	29.3	7.93	2.53	2	1
High	Master Protein	lcl	[locus_tag=EDL933_4524] [db_xref=GO:0003735,GO:0005622,GO:0005840,GO:0006412] [protein=SSU ribosomal protein S14p (S29e), zinc-independent] [protein_id=AIG70672.1] [location=complement(4269218..4269523)] [gbkey=CDS]	FALSE	6.025	13	1	2	1	101	11.6	11.17	4.22	1	1
High	Master Protein	W8ZPC5	Cold shock-like protein CspD OS=Escherichia coli O25b:H4-ST131 OX=941322 GN=cspD PE=4 SV=1	FALSE	6.013	17	1	1	1	84	9.1	6.76	2.4	1	1
High	Master Protein	A0A7U8LR82	Molecular chaperone DnaJ OS=Escherichia coli O11 OX=1095705 GN=dnaJ PE=4 SV=1	FALSE	5.976	9	2	3	2	371	40.6	7.84	2.33	2	1
High	Master Protein	A0A5P0J5H8	Alanine--tRNA ligase OS=Escherichia coli OX=562 GN=alaS PE=3 SV=1	FALSE	5.938	3	2	2	2	876	96	5.76	0	2	1
High	Master Protein	J7R784	Uncharacterized protein (Fragment) OS=Escherichia coli OX=562 GN=BN17_17961 PE=4 SV=1	FALSE	5.937	17	1	1	1	84	9.3	6.83	3.35	1	1
High	Master Protein	E9TJ49	Peptidase T OS=Escherichia coli MS 117-3 OX=749539 GN=pepT PE=3 SV=1	FALSE	5.934	4	1	1	1	409	45	5.58	3.22	1	1
High	Master Protein	WP_024222729.1	hypothetical protein [Escherichia coli]	FALSE	5.923	5	1	1	1	324	36.3	9.17	3.41	1	1
High	Master Protein	A0A3W4JF32	Alpha-2-macroglobulin OS=Escherichia coli OX=562 GN=EF082_05730 PE=3 SV=1	FALSE	5.915	1	2	3	2	1653	181.5	5.35	8.65	2	1
High	Master Protein	A0A6G3HF49	N-acetylmuramoyl-L-alanine amidase OS=Escherichia coli OX=562 GN=amiB PE=4 SV=1	FALSE	5.892	4	1	1	1	445	48	9.39	3.74	1	1
High	Master Protein	A0A7Z1LAE0	2-hydroxyacid dehydrogenase OS=Escherichia coli OX=562 GN=CT144_14730 PE=4 SV=1	FALSE	5.86	4	1	1	1	329	36.5	5.44	2.97	1	1
High	Master Protein	A0A2I6FJR1	Lysine decarboxylase OS=Escherichia coli OX=562 GN=CR538_23330 PE=3 SV=1	FALSE	5.855	2	1	1	1	715	81.2	6.34	3.06	1	1
High	Master Protein	A0A3W4JCV3	Type II secretion system protein GspD OS=Escherichia coli OX=562 GN=gspD PE=3 SV=1	FALSE	5.793	3	2	2	2	686	74.2	5.99	4.84	2	1
High	Master Protein	A0A6N7N6W5	30S ribosomal protein S15 OS=Escherichia coli OX=562 GN=rpsO PE=3 SV=1	FALSE	5.788	54	3	3	3	89	10.3	10.18	5	3	1
High	Master Protein	A0A3J8QPT7	DUF1508 domain-containing protein OS=Escherichia coli OX=562 GN=yegP PE=3 SV=1	FALSE	5.787	15	1	1	1	110	12	9.44	2.26	1	1
High	Master Protein	A0A0L7ANT5	4Fe-4S binding protein OS=Escherichia coli OX=562 GN=yfhL PE=4 SV=1	FALSE	5.771	16	1	1	1	86	9.8	4.98	2.29	1	1
High	Master Protein	sp	SODC_HUMAN	TRUE	5.673	12	2	2	2	153	15.8	6.13	4.49	2	1
High	Master Protein	A0A1X3J703	Glutaminase OS=Escherichia coli TA447 OX=656447 GN=glsA PE=3 SV=1	FALSE	5.666	13	2	3	2	310	32.9	5.07	2.59	2	1
High	Master Protein	A0A6M9RXP8	PTS sugar transporter subunit IIB OS=Escherichia coli OX=562 GN=HAP53_05935 PE=4 SV=1	FALSE	5.65	15	1	1	1	95	10	5.41	2.93	1	1
High	Master Protein	A0A0B4N381	Glucose-1-phosphate thymidylyltransferase OS=Escherichia coli OX=562 GN=rmlA PE=3 SV=1	FALSE	5.626	10	3	3	3	289	32	5.2	3.95	3	1
High	Master Protein	D8A1W2	Phage shock protein A OS=Escherichia coli (strain MS 21-1) OX=749527 GN=pspA PE=3 SV=1	FALSE	5.591	9	2	2	2	222	25.5	5.49	1.91	2	1
High	Master Protein	A0A7I9AD95	GfcB_1 protein OS=Escherichia coli OX=562 GN=gfcB_1 PE=4 SV=1	FALSE	5.564	14	2	2	2	246	27.5	7.12	2.8	2	1
High	Master Protein	A0A0K5R7P3	Tellurium resistance protein TerZ OS=Escherichia coli OX=562 GN=AM270_23590 PE=4 SV=1	FALSE	5.55	21	2	2	2	193	21	6.68	0	2	1
High	Master Protein	A0A1X3KU61	Modulator of Rho-dependent transcription termination (ROF) OS=Escherichia coli H605 OX=656410 GN=EATG_03483 PE=4 SV=1	FALSE	5.539	16	1	1	1	86	9.7	4.74	1.73	1	1
High	Master Protein	A0A7U9AYW7	Acetyltransferase, GNAT family OS=Escherichia coli TA143 OX=656437 GN=ECMG_03671 PE=4 SV=1	FALSE	5.521	8	1	2	1	111	12.7	9.04	3.99	1	1
High	Master Protein	E9TD13	Glycerol dehydrogenase OS=Escherichia coli MS 117-3 OX=749539 GN=gldA PE=3 SV=1	FALSE	5.51	4	1	1	1	380	40	4.98	2.78	1	1
High	Master Protein	sp	CYB5_HUMAN	TRUE	5.505	7	1	1	1	133	15.2	4.96	2.23	1	1
High	Master Protein	A0A080G1G0	Glutaredoxin, GrxA family OS=Escherichia coli 1-392-07_S4_C3 OX=1444275 GN=grxA PE=4 SV=1	FALSE	5.503	13	1	2	1	85	9.7	5.45	2.2	1	1
High	Master Protein	A0A2X7F490	Putative D-alanyl-D-alanine carboxypeptidase OS=Escherichia coli OX=562 GN=ampH_2 PE=3 SV=1	FALSE	5.501	6	2	3	2	434	47.8	8.05	1.91	2	1
High	Master Protein	A0A3R0UN21	Two-component system sensor histidine kinase EvgS (Fragment) OS=Escherichia coli OX=562 GN=DP277_24700 PE=4 SV=1	FALSE	5.467	6	1	2	1	170	19.2	8.44	4.3	1	1
High	Master Protein	A0A6C9BVL4	Ubiquinone biosynthesis accessory factor UbiK OS=Escherichia coli OX=562 GN=ubiK PE=3 SV=1	FALSE	5.466	21	2	3	2	96	11.3	6.15	1.65	2	1
High	Master Protein	A0A4T8WWM6	Beta-ketoacyl-ACP synthase I OS=Escherichia coli OX=562 GN=EXM29_04365 PE=3 SV=1	FALSE	5.463	6	2	2	2	406	42.6	5.44	3.53	2	1
High	Master Protein	F4SR33	Phosphopantetheine adenylyltransferase OS=Escherichia coli H736 OX=656414 GN=coaD PE=3 SV=1	FALSE	5.461	10	1	1	1	194	22.1	8.48	2.23	1	1
High	Master Protein	A0A6C9P482	P-II family nitrogen regulator OS=Escherichia coli OX=562 GN=glnK PE=3 SV=1	FALSE	5.413	17	1	1	1	112	12.2	6.13	2.99	1	1
High	Master Protein	WP_000193240.1	MULTISPECIES: hypothetical protein [Escherichia]	FALSE	5.396	8	1	2	1	120	13.2	5.1	4.4	1	1
High	Master Protein	F4TAS6	6,7-dimethyl-8-ribityllumazine synthase OS=Escherichia coli M718 OX=656419 GN=ribH PE=3 SV=1	FALSE	5.378	14	2	2	2	188	19.8	9.55	1.75	2	1
High	Master Protein	A0A210NQH2	UDP-N-acetylglucosamine 2-epimerase OS=Escherichia coli OX=562 GN=fnl3 PE=3 SV=1	FALSE	5.377	3	1	1	1	376	42.7	6.81	2.7	1	1
High	Master Protein	A0A7I8ZCW3	YiaO_2 protein OS=Escherichia coli OX=562 GN=yiaO_2 PE=4 SV=1	FALSE	5.375	9	3	3	3	328	36.5	8.4	6.99	3	1
High	Master Protein	A0A6M1J0C9	H-NS histone family protein OS=Escherichia coli OX=562 GN=G5696_21730 PE=3 SV=1	FALSE	5.265	11	2	3	2	153	17.8	5.15	3.91	2	1
High	Master Protein	W9AKW6	30S ribosomal protein S11 OS=Escherichia coli O25b:H4-ST131 OX=941322 GN=rpsK PE=3 SV=1	FALSE	5.253	15	2	3	2	129	13.9	11.33	5.37	2	1
High	Master Protein	A0A7L5HJ70	Protein-export membrane protein SecG OS=Escherichia coli OX=562 GN=secG PE=3 SV=1	FALSE	5.164	27	2	3	2	110	11.4	6.6	2.63	2	1
High	Master Protein	A0A5C9AFR2	50S ribosomal protein L20 (Fragment) OS=Escherichia coli OX=562 GN=rplT PE=4 SV=1	FALSE	5.119	33	1	3	1	30	3.2	6.55	5.3	1	1
High	Master Protein	A0A6G4C3L9	Sulfatase-like hydrolase/transferase OS=Escherichia coli OX=562 GN=G4V04_14210 PE=3 SV=1	FALSE	5.089	4	2	2	2	560	62.7	6.05	5.26	2	1
High	Master Protein	A0A6M9R9E7	Lipoprotein toxin entericidin B OS=Escherichia coli OX=562 GN=ecnB PE=3 SV=1	FALSE	5.001	40	1	1	1	48	4.8	8.21	3.24	1	1
High	Master Protein	sp	PPIA_HUMAN	TRUE	4.994	10	2	2	2	164	17.9	7.81	2.88	2	1
High	Master Protein	A0A4D0V4R3	Outer membrane protein Lom OS=Escherichia coli OX=562 GN=BvCmsKSP058_05224 PE=4 SV=1	FALSE	4.968	6	1	1	1	207	22.5	7.69	2.38	1	1
High	Master Protein	A0A023Z4H5	Uncharacterized protein OS=Escherichia coli O145:H28 (strain RM12581) OX=1248823 GN=ECRM12581_21925 PE=4 SV=1	FALSE	4.967	5	1	1	1	194	21.4	9.38	3.07	1	1
High	Master Protein	A0A7I9AT91	FecA_2 protein OS=Escherichia coli OX=562 GN=fecA_2 PE=3 SV=1	FALSE	4.94	3	1	1	1	774	85.3	5.94	2.86	1	1
High	Master Protein	A0A4S1NY85	Porphyrinogen oxidase OS=Escherichia coli OX=562 GN=yfeX PE=4 SV=1	FALSE	4.934	4	1	1	1	299	33	5.67	2.93	1	1
High	Master Protein	A0A069XGT2	Agmatinase OS=Escherichia coli 3-373-03_S4_C2 OX=1444252 GN=speB PE=3 SV=1	FALSE	4.868	5	1	1	1	306	33.6	5.39	2.28	1	1
High	Master Protein	A0A423CL21	Uncharacterized protein OS=Escherichia coli OX=562 GN=BFD68_23500 PE=4 SV=1	FALSE	4.843	7	1	1	1	152	17	8.97	3.11	1	1
High	Master Protein	A0A6G6KZF6	Bifunctional NADP-dependent 3-hydroxy acid dehydrogenase/3-hydroxypropionate dehydrogenase YdfG OS=Escherichia coli OX=562 GN=ydfG PE=3 SV=1	FALSE	4.834	7	1	1	1	248	27.3	6	3.09	1	1
High	Master Protein	A0A5B1F526	Dimethylsulfoxide reductase subunit B OS=Escherichia coli OX=562 GN=dmsB PE=4 SV=1	FALSE	4.793	9	2	2	2	205	22.8	6.61	4.84	2	1
High	Master Protein	D8ADF8	Molybdenum cofactor biosynthesis protein B OS=Escherichia coli (strain MS 21-1) OX=749527 GN=moaB PE=3 SV=1	FALSE	4.787	12	2	2	2	170	18.7	6.1	5.71	2	1
High	Master Protein	A0A140RN19	Endoribonuclease L-PSP OS=Escherichia coli OX=562 GN=DL705_04660 PE=3 SV=1	FALSE	4.787	11	1	1	1	114	12.5	5.16	3.24	1	1
High	Master Protein	A0A5C8XJU5	Phosphoglycerol transferase I OS=Escherichia coli OX=562 GN=opgB PE=3 SV=1	FALSE	4.783	2	1	1	1	763	85.5	6.74	3.27	1	1
High	Master Protein	A0A330AAI6	Hydroxyacylglutathione hydrolase GloC OS=Escherichia coli OX=562 GN=gloC PE=4 SV=1	FALSE	4.717	11	2	2	2	215	23.7	5.22	2.44	2	1
High	Master Protein	A0A7I8ZNN1	YdcH protein OS=Escherichia coli OX=562 GN=ydcH PE=4 SV=1	FALSE	4.708	11	1	2	1	74	8.8	9	5.37	1	1
High	Master Protein	Q8GNF2	Fnl2 OS=Escherichia coli OX=562 GN=fnl2 PE=4 SV=1	FALSE	4.659	6	2	2	2	374	42.2	5.86	4.15	2	1
High	Master Protein	A0A7D7E0U9	MPT synthase subunit 2 OS=Escherichia coli OX=562 GN=moaE PE=3 SV=1	FALSE	4.657	7	1	1	1	150	17.1	5.87	2.54	1	1
High	Master Protein	A0A0K4AW81	Membrane-bound lytic murein transglycosylase C OS=Escherichia coli OX=562 GN=mltC PE=3 SV=1	FALSE	4.631	3	1	1	1	359	40.2	9.41	2.58	1	1
High	Master Protein	A0A3U2H5W3	Transcription termination/antitermination protein NusA OS=Escherichia coli OX=562 GN=nusA PE=3 SV=1	FALSE	4.622	5	2	2	2	495	54.9	4.63	0	2	1
High	Master Protein	A0A0K4M0Y4	6-phosphogluconolactonase OS=Escherichia coli OX=562 GN=pgl PE=3 SV=1	FALSE	4.619	9	1	1	1	331	36.1	5.26	2.14	1	1
High	Master Protein	A0A0D8WM50	ATP-dependent protease subunit HslV OS=Escherichia coli OX=562 GN=hslV PE=2 SV=1	FALSE	4.612	6	1	2	1	176	19.1	6.39	2.13	1	1
High	Master Protein	A0A6M0PTX7	3-oxoacyl-[acyl-carrier-protein] synthase 2 OS=Escherichia coli OX=562 GN=fabF PE=3 SV=1	FALSE	4.597	3	1	1	1	413	42.9	5.99	2.95	1	1
High	Master Protein	A0A7L5IKY2	Cytoskeleton protein RodZ OS=Escherichia coli OX=562 GN=rodZ PE=3 SV=1	FALSE	4.576	4	1	1	1	337	36.2	5.74	3.28	1	1
High	Master Protein	A0A0K4UZH8	Tol-Pal system protein TolR OS=Escherichia coli OX=562 GN=tolR PE=3 SV=1	FALSE	4.545	14	2	2	2	142	15.4	5.53	2.7	2	1
High	Master Protein	sp	CATA_HUMAN	TRUE	4.519	4	2	2	2	526	59.6	7.39	5.45	2	1
High	Master Protein	A0A0P0SN54	Protein-tyrosine kinase OS=Escherichia coli OX=562 GN=MJ49_01235 PE=3 SV=1	FALSE	4.515	1	1	1	1	726	81.2	6.52	2.07	1	1
High	Master Protein	A6MTR2	Shiga toxin 2 B subunit OS=Escherichia coli OX=562 PE=4 SV=1	FALSE	4.514	11	1	1	1	89	9.8	5.36	2.63	1	1
High	Master Protein	A0A0T5XN63	50S ribosomal protein L33 OS=Escherichia coli OX=562 GN=rpmG PE=3 SV=1	FALSE	4.468	27	1	3	1	55	6.4	10.24	5.56	1	1
High	Master Protein	E9XPR9	Pyrroline-5-carboxylate reductase OS=Escherichia coli TW10509 OX=656449 GN=proC PE=3 SV=1	FALSE	4.426	5	1	1	1	269	28.1	5.63	2.28	1	1
High	Master Protein	A0A5P0Z1G2	NiFe hydrogenase OS=Escherichia coli OX=562 GN=hybO PE=3 SV=1	FALSE	4.413	4	1	1	1	372	39.6	6.68	2.86	1	1
High	Master Protein	A0A348E5S4	ABC-type organic solvent transporter OS=Escherichia coli OX=562 GN=mlaD PE=4 SV=1	FALSE	4.37	12	1	1	1	186	19.9	5.2	2.43	1	1
High	Master Protein	D3QPM3	Uncharacterized protein OS=Escherichia coli O55:H7 (strain CB9615 / EPEC) OX=701177 GN=ygaM PE=3 SV=1	FALSE	4.319	10	1	2	1	113	12.3	8.02	4.01	1	1
High	Master Protein	A0A4C4ILD8	Bacteriophage N4 receptor OS=Escherichia coli OX=562 GN=BvCmsHHP056_01045 PE=4 SV=1	FALSE	4.31	1	1	1	1	990	111.3	6.9	2.64	1	1
High	Master Protein	A0A5E9S4E6	Kdo(2)-lipid A phosphoethanolamine 7''-transferase OS=Escherichia coli OX=562 GN=eptB PE=4 SV=1	FALSE	4.297	3	1	1	1	563	63.8	8.65	2.65	1	1
High	Master Protein	A0A377LD45	Murein hydrolase B OS=Escherichia coli OX=562 GN=mltB_2 PE=4 SV=1	FALSE	4.235	12	2	2	1	160	17.5	7.62	5.2	2	1
High	Master Protein	A0A2D0P9U5	Succinate--CoA ligase [ADP-forming] subunit alpha OS=Escherichia coli O127:H6 OX=168807 GN=sucD PE=3 SV=1	FALSE	4.213	6	2	2	2	289	29.8	6.54	1.94	2	1
High	Master Protein	A0A0K3YS18	Protein/nucleic acid deglycase OS=Escherichia coli OX=562 GN=yhbO PE=3 SV=1	FALSE	4.166	15	1	1	1	172	18.9	5.47	2.53	1	1
High	Master Protein	A0A2X5QAQ7	Polysaccharide deacetylase family protein OS=Escherichia coli OX=562 GN=icaB PE=4 SV=1	FALSE	4.118	3	1	1	1	409	46.3	9.85	2.62	1	1
High	Master Protein	A0A4T5UPV9	Fe-S cluster assembly scaffold SufA OS=Escherichia coli OX=562 GN=sufA PE=3 SV=1	FALSE	4.092	16	1	1	1	122	13.3	4.87	2.76	1	1
High	Master Protein	D6I810	Pyruvate dehydrogenase [ubiquinone] OS=Escherichia coli B185 OX=550676 GN=poxB PE=3 SV=1	FALSE	4.087	3	2	2	2	572	61.9	6.28	3.99	2	1
High	Master Protein	A0A0F3VH33	Bacteriophage HK97 gp40 OS=Escherichia coli OX=562 GN=A6V01_25750 PE=4 SV=1	FALSE	4.075	13	1	1	1	127	14.1	7.24	0	1	1
High	Master Protein	F4T426	Protein YgaD OS=Escherichia coli M605 OX=656417 GN=ECIG_01251 PE=4 SV=1	FALSE	4.049	8	1	1	1	166	17.7	5.12	2.25	1	1
High	Master Protein	A0A377BK54	DNA gyrase subunit A OS=Escherichia coli OX=562 GN=gyrA PE=3 SV=1	FALSE	4.039	3	2	2	2	875	97	5.22	1.92	2	1
High	Master Protein	A0A028E6T3	Probable cytosol aminopeptidase OS=Escherichia coli O118:H16 str. 2009C-4446 OX=1446549 GN=pepA PE=3 SV=1	FALSE	4.034	2	1	1	1	503	54.9	7.23	1.97	1	1
High	Master Protein	A0A1X3LC32	Small heat shock protein IbpB OS=Escherichia coli TA054 OX=656433 GN=ibpB PE=3 SV=1	FALSE	4.017	11	2	2	2	142	16.1	5.29	3.65	2	1
High	Master Protein	C3TJS3	Citrate (pro-3S)-lyase subunit beta OS=Escherichia coli OX=562 GN=ECs0655 PE=3 SV=1	FALSE	4.015	4	1	2	1	307	33.6	5.74	1.9	1	1
High	Master Protein	A0A7U9LZN9	Uncharacterized protein OS=Escherichia coli O145:H28 OX=1078034 GN=yciF PE=4 SV=1	FALSE	3.987	7	1	1	1	166	18.6	5.44	2.43	1	1
High	Master Protein	A0A7X1MN97	50S ribosomal protein L36 OS=Escherichia coli OX=562 GN=DL637_23270 PE=4 SV=1	FALSE	3.975	21	1	3	1	38	4.3	10.61	7.43	1	1
High	Master Protein	A0A6C9BPJ2	Alpha-galactosidase OS=Escherichia coli OX=562 GN=melA PE=3 SV=1	FALSE	3.97	2	1	1	1	451	50.6	5.83	3.45	1	1
High	Master Protein	A0A7Z2FDA9	F0F1 ATP synthase subunit epsilon OS=Escherichia coli O157:H7 OX=83334 GN=atpC PE=4 SV=1	FALSE	3.955	27	2	3	2	139	15.1	5.72	2.09	2	1
High	Master Protein	D3QJP5	Uncharacterized protein OS=Escherichia coli O55:H7 (strain CB9615 / EPEC) OX=701177 GN=yohN PE=4 SV=1	FALSE	3.891	6	1	2	1	172	19.3	7.21	4.97	1	1
High	Master Protein	A0A0B5HLG4	Glutamate--tRNA ligase OS=Escherichia coli OX=562 GN=gltX PE=3 SV=1	FALSE	3.872	3	1	1	1	471	53.8	6.01	0	1	1
High	Master Protein	A0A3Z7VV75	Uncharacterized protein (Fragment) OS=Escherichia coli OX=562 GN=DL473_25575 PE=4 SV=1	FALSE	3.85	18	1	1	1	72	8	5.01	3.09	1	1
High	Master Protein	A0A1M0CMM8	DUF1454 family protein OS=Escherichia coli OX=562 GN=BEN53_24305 PE=4 SV=1	FALSE	3.843	6	1	1	1	199	21.8	9.19	2.12	1	1
High	Master Protein	A0A6M1HYW7	Fe2+-enterobactin ABC transporter substrate-binding protein OS=Escherichia coli OX=562 GN=fepB PE=4 SV=1	FALSE	3.843	7	2	2	2	318	34.3	6.42	2.58	2	1
High	Master Protein	B7UPB8	Ferric-rhodotorulic acid outer membrane transporter OS=Escherichia coli O127:H6 (strain E2348/69 / EPEC) OX=574521 GN=fhuE PE=3 SV=1	FALSE	3.809	2	1	1	1	729	81.2	5.02	0	1	1
High	Master Protein	A0A403PMP6	Nif3-like dinuclear metal center hexameric protein OS=Escherichia coli OX=562 GN=D4U49_20420 PE=3 SV=1	FALSE	3.758	12	2	2	2	247	26.9	5.11	2.27	2	1
High	Master Protein	A0A1Q4PIX6	NADH-quinone oxidoreductase subunit F OS=Escherichia coli OX=562 GN=nuoF PE=3 SV=1	FALSE	3.688	3	1	1	1	445	49.3	6.86	2.71	1	1
High	Master Protein	A0A2I5STV1	Transcription elongation factor GreA OS=Escherichia coli OX=562 GN=greA PE=3 SV=1	FALSE	3.679	12	2	2	2	158	17.6	4.84	1.89	2	1
High	Master Protein	A0A4C3QFM6	Cell division protein ZapB OS=Escherichia coli OX=562 GN=zapB PE=4 SV=1	FALSE	3.644	14	1	1	1	57	6.5	4.72	2.3	1	1
High	Master Protein	A0A7U9LQ33	DNA damage-inducible protein OS=Escherichia coli O145:H28 OX=1078034 GN=ECH27V05_00246 PE=4 SV=1	FALSE	3.585	10	1	2	1	80	9.2	9.09	5.77	1	1
High	Master Protein	A0A4T5M6L5	Tryptophan--tRNA ligase OS=Escherichia coli OX=562 GN=trpS PE=3 SV=1	FALSE	3.527	4	1	1	1	334	37.4	6.74	0	1	1
High	Master Protein	A0A1V3W179	Biotin carboxylase OS=Escherichia coli OX=562 GN=BMT91_11300 PE=4 SV=1	FALSE	3.512	6	2	2	2	449	49.3	7.11	0	2	1
High	Master Protein	F4T7Y8	Putative lipoprotein OS=Escherichia coli M605 OX=656417 GN=ECIG_03124 PE=4 SV=1	FALSE	3.503	10	1	1	1	109	12.1	9.48	2.68	1	1
High	Master Protein	D3QSW8	Biotin carboxyl carrier protein of acetyl-CoA carboxylase OS=Escherichia coli O55:H7 (strain CB9615 / EPEC) OX=701177 GN=accB PE=4 SV=1	FALSE	3.501	5	1	2	1	156	16.7	4.81	2.5	1	1
High	Master Protein	A0A0A0FIE5	Putative lipoprotein YgdR OS=Escherichia coli G3/10 OX=1455601 GN=EL76_1005 PE=4 SV=1	FALSE	3.501	43	1	1	1	72	7.8	4.83	0	1	1
High	Master Protein	A0A2T3T1K7	Citrate lyase acyl carrier protein OS=Escherichia coli OX=562 GN=citD PE=3 SV=1	FALSE	3.464	9	1	3	1	98	10.7	4.81	4.01	1	1
High	Master Protein	Q9JN24	Peptide deformylase OS=Escherichia coli OX=562 GN=def PE=3 SV=1	FALSE	3.464	7	1	1	1	150	16.9	5.14	2.64	1	1
High	Master Protein	A0A3A6T2M7	DUF2526 domain-containing protein OS=Escherichia coli OX=562 GN=D3821_04090 PE=4 SV=1	FALSE	3.454	13	1	1	1	77	8.7	5.67	3.34	1	1
High	Master Protein	A0A6M0PVA5	50S ribosomal protein L34 OS=Escherichia coli OX=562 GN=rpmH PE=3 SV=1	FALSE	3.453	17	1	2	1	46	5.4	13	5.28	1	1
High	Master Protein	A0A6M0PYT3	Phospholipid-binding protein MlaC OS=Escherichia coli OX=562 GN=mlaC PE=4 SV=1	FALSE	3.436	11	1	1	1	213	24.1	9.19	2.71	1	1
High	Master Protein	A0A2G8ZUC8	UPF0253 protein YaeP OS=Escherichia coli OX=562 GN=yaeP PE=3 SV=1	FALSE	3.405	24	1	1	1	66	7.2	4.84	0	1	1
High	Master Protein	A0A2T1LEM2	50S ribosomal protein L14 OS=Escherichia coli OX=562 GN=rplN PE=3 SV=1	FALSE	3.392	7	1	1	1	123	13.6	10.42	2.14	1	1
High	Master Protein	A0A3Y3V9W9	C4-type zinc finger protein YbiI OS=Escherichia coli OX=562 GN=ybiI PE=4 SV=1	FALSE	3.386	20	1	1	1	88	9.7	5.48	2.04	1	1
High	Master Protein	A0A1M0CSP5	RNA-binding protein Hfq OS=Escherichia coli OX=562 GN=hfq PE=3 SV=1	FALSE	3.372	13	1	2	1	102	11.2	7.65	0	1	1
High	Master Protein	A0A3T8K376	Metalloprotease PmbA (Fragment) OS=Escherichia coli OX=562 GN=pmbA PE=3 SV=1	FALSE	3.37	9	1	1	1	137	15.1	5.87	0	1	1
High	Master Protein	A0A2W6PF93	Hydrogenase 1 large subunit (Fragment) OS=Escherichia coli OX=562 GN=DNQ45_07305 PE=3 SV=1	FALSE	3.35	10	1	1	1	163	18.2	6.07	2.01	1	1
High	Master Protein	D7ZL65	Protease HtpX OS=Escherichia coli MS 69-1 OX=749531 GN=htpX PE=3 SV=1	FALSE	3.328	5	1	1	1	293	31.9	7.14	0	1	1
High	Master Protein	A0A2W6RDN4	N-acetylmuramoyl-L-alanine amidase OS=Escherichia coli OX=562 GN=amiC PE=4 SV=1	FALSE	3.287	4	1	1	1	398	43.6	9.41	2.13	1	1
High	Master Protein	A0A7L5LB61	Thioredoxin peroxidase OS=Escherichia coli O157:H7 OX=83334 GN=E3175_07220 PE=4 SV=1	FALSE	3.25	10	1	1	1	156	17.7	5.24	0	1	1
High	Master Protein	A0A1X3LU77	S4 RNA-binding domain-containing protein OS=Escherichia coli TA249 OX=656441 GN=EAZG_00333 PE=4 SV=1	FALSE	3.24	13	1	1	1	70	7.4	8.03	2.42	1	1
High	Master Protein	A0A6M7H5U6	Transcription termination/antitermination protein NusG OS=Escherichia coli O157:H7 OX=83334 GN=nusG PE=3 SV=1	FALSE	3.206	7	1	1	1	181	20.5	6.81	2.28	1	1
High	Master Protein	A0A6M9QVF9	Gamma-glutamyl phosphate reductase OS=Escherichia coli OX=562 GN=proA PE=3 SV=1	FALSE	3.199	3	1	1	1	417	44.6	5.9	2.01	1	1
High	Master Protein	A0A2S1YB30	Elongation factor P OS=Escherichia coli OX=562 GN=efp PE=3 SV=1	FALSE	3.171	6	1	1	1	188	20.6	5.02	2.15	1	1
High	Master Protein	D7Y875	Acetyl-coenzyme A carboxylase carboxyl transferase subunit alpha OS=Escherichia coli (strain MS 115-1) OX=749537 GN=accA PE=3 SV=1	FALSE	3.169	5	1	1	1	319	35.3	6.04	0	1	1
High	Master Protein	F4NHV3	Ribosome-binding factor A OS=Escherichia coli D9 OX=556266 GN=rbfA PE=3 SV=1	FALSE	3.149	7	1	1	1	139	15.8	5.68	0	1	1
High	Master Protein	A0A5E8HLC4	Serine--tRNA ligase OS=Escherichia coli OX=562 GN=serS PE=3 SV=1	FALSE	3.1	3	1	1	1	430	48.4	5.5	2.47	1	1
High	Master Protein	A0A6M0PQD6	Fimbrial protein OS=Escherichia coli OX=562 GN=G4V03_00970 PE=4 SV=1	FALSE	3.072	1	1	2	1	909	99.1	4.91	2.46	1	1
High	Master Protein	A0A5E9RQI7	Sulfur carrier protein TusA OS=Escherichia coli OX=562 GN=tusA PE=3 SV=1	FALSE	3.066	22	1	1	1	81	9.1	5.39	2.52	1	1
High	Master Protein	A0A7H9LSD8	4-hydroxy-tetrahydrodipicolinate reductase OS=Escherichia coli OX=562 GN=dapB PE=3 SV=1	FALSE	3.038	3	1	1	1	273	28.9	5.76	1.76	1	1
High	Master Protein	A0A2K0NV62	Uncharacterized protein OS=Escherichia coli OX=562 GN=RK56_024640 PE=4 SV=1	FALSE	2.988	9	1	2	1	133	15.3	9.25	2.26	1	1
High	Master Protein	A0A026V5E3	Transcription antitermination protein NusB OS=Escherichia coli O174:H8 str. 04-3038 OX=1446704 GN=nusB PE=3 SV=1	FALSE	2.978	8	1	1	1	139	15.6	8.07	0	1	1
High	Master Protein	A0A0K4INQ5	Pyridoxal kinase PdxY OS=Escherichia coli OX=562 GN=pdxY PE=3 SV=1	FALSE	2.956	5	1	1	1	286	31.2	6.68	2.34	1	1
High	Master Protein	V0X8C4	30S ribosomal protein S9 OS=Escherichia coli 908525 OX=1268995 GN=HMPREF1608_04893 PE=3 SV=1	FALSE	2.947	14	1	2	1	85	9.7	10.92	0	1	1
High	Master Protein	A0A5N9YBH6	Modulator protein (Fragment) OS=Escherichia coli OX=562 GN=EI032_26385 PE=4 SV=1	FALSE	2.947	13	1	1	1	61	7.2	10.54	2.84	1	1
High	Master Protein	A0A7Z8HVP1	Aldehyde dehydrogenase family protein OS=Escherichia coli OX=562 GN=E5S43_08530 PE=4 SV=1	FALSE	2.945	2	1	1	1	499	53.8	5.63	2.69	1	1
High	Master Protein	A0A7A0MYH2	Glutaredoxin 2 OS=Escherichia coli OX=562 GN=grxB PE=4 SV=1	FALSE	2.945	9	1	1	1	215	24.3	7.96	0	1	1
High	Master Protein	A0A1X3JG26	50S ribosomal protein L35 OS=Escherichia coli H386 OX=656397 GN=rpmI PE=3 SV=1	FALSE	2.943	19	1	1	1	70	7.9	11.52	2	1	1
High	Master Protein	U9ZLD5	Pyridoxine 5'-phosphate synthase OS=Escherichia coli 907713 OX=1268986 GN=pdxJ PE=3 SV=1	FALSE	2.938	4	1	1	1	248	27	6.13	2.15	1	1
High	Master Protein	V0ACY7	Pyruvate formate-lyase 1-activating enzyme domain protein OS=Escherichia coli 907713 OX=1268986 GN=HMPREF1599_01639 PE=4 SV=1	FALSE	2.935	10	1	1	1	113	13.2	7.14	0	1	1
High	Master Protein	A0A0K3WAL0	Translocon EspA OS=Escherichia coli OX=562 GN=espA PE=4 SV=1	FALSE	2.92	15	1	1	1	192	20.5	4.91	0	1	1
High	Master Protein	A0A7U8MQD6	Addiction module toxin, GnsA/GnsB family OS=Escherichia coli O157:H7 OX=83334 GN=CQJ22_003853 PE=4 SV=1	FALSE	2.919	18	1	1	1	44	5	8.53	2.22	1	1
High	Master Protein	A0A271QT01	Glycine cleavage system H protein OS=Escherichia coli OX=562 GN=gcvH PE=3 SV=1	FALSE	2.878	7	1	2	1	129	13.8	4.09	5.76	1	1
High	Master Protein	A0A1X3J6X2	Putative acyl-CoA dehydrogenase OS=Escherichia coli TA447 OX=656447 GN=ECXG_02713 PE=3 SV=1	FALSE	2.876	3	1	1	1	546	61	7.33	0	1	1
High	Master Protein	A0A080GHG8	Molybdopterin adenylyltransferase OS=Escherichia coli 1-392-07_S4_C3 OX=1444275 GN=mog PE=4 SV=1	FALSE	2.818	6	1	1	1	195	21.1	5	2.1	1	1
High	Master Protein	A0A1X3KR34	Integration host factor subunit beta OS=Escherichia coli H605 OX=656410 GN=ihfB PE=3 SV=1	FALSE	2.77	16	1	1	1	94	10.7	9.35	2.4	1	1
High	Master Protein	A0A5P0PX64	DUF1481 domain-containing protein OS=Escherichia coli OX=562 GN=EI021_22000 PE=4 SV=1	FALSE	2.752	5	1	1	1	231	26.3	6.93	1.72	1	1
High	Master Protein	sp	K22E_HUMAN	TRUE	2.707	2	1	1	1	645	65.8	8	2.01	1	1
High	Master Protein	A0A6G3HP85	N-acetylglucosamine-6-phosphate deacetylase (Fragment) OS=Escherichia coli OX=562 GN=nagA PE=3 SV=1	FALSE	2.673	6	1	1	1	204	21.7	7.81	2.29	1	1
High	Master Protein	C3SHG4	MmcQ/YjbR family DNA-binding protein OS=Escherichia coli OX=562 GN=ARC77_17520 PE=4 SV=1	FALSE	2.672	8	1	1	1	118	13.5	6.16	1.79	1	1
High	Master Protein	F4VJZ8	Nitrite reductase [NAD(P)H], small subunit OS=Escherichia coli H591 OX=656408 GN=ECPG_02678 PE=4 SV=1	FALSE	2.672	16	1	1	1	108	12.3	5.24	0	1	1
High	Master Protein	A0A768K1M3	UPF0352 protein YejL OS=Escherichia coli OX=562 GN=yejL PE=3 SV=1	FALSE	2.656	13	1	1	1	75	8.3	5.78	2.17	1	1
High	Master Protein	A0A5C9ARW6	Holliday junction branch migration protein RuvA (Fragment) OS=Escherichia coli OX=562 GN=ruvA PE=3 SV=1	FALSE	2.627	7	1	1	1	181	19.6	5.63	2.04	1	1
High	Master Protein	A0A4Q0CVE1	33 kDa chaperonin OS=Escherichia coli OX=562 GN=hslO PE=3 SV=1	FALSE	2.622	4	1	1	1	292	32.5	4.51	0	1	1
High	Master Protein	A0A4Q8F496	ATPase_AAA_core domain-containing protein OS=Escherichia coli OX=562 GN=EXX71_22930 PE=4 SV=1	FALSE	2.611	4	1	2	1	544	62.1	7.27	0	1	1
High	Master Protein	A0A6L9AQR0	Uncharacterized protein OS=Escherichia coli OX=562 GN=GUC12_23815 PE=4 SV=1	FALSE	2.588	2	1	2	1	572	66.7	5.83	2.25	1	1
High	Master Protein	A0A028DMC6	Uncharacterized protein (Fragment) OS=Escherichia coli O118:H16 str. 2009C-4446 OX=1446549 GN=BX23_03265 PE=4 SV=1	FALSE	2.575	8	1	1	1	132	14.3	11.36	0	1	1
High	Master Protein	A0A4Y8GM10	Probable 4-amino-4-deoxy-L-arabinose-phosphoundecaprenol flippase subunit ArnF OS=Escherichia coli OX=562 GN=arnF PE=3 SV=1	FALSE	2.531	23	1	2	1	128	14.1	9.17	0	1	1
High	Master Protein	A0A2D0P326	Lysine--tRNA ligase OS=Escherichia coli O127:H6 OX=168807 GN=lysS PE=3 SV=1	FALSE	2.515	4	1	2	1	505	57.6	5.24	0	1	1
High	Master Protein	Q5IP77	Aerobic regulator (Fragment) OS=Escherichia coli OX=562 GN=arcA PE=4 SV=1	FALSE	2.502	6	1	1	1	182	21	7.5	0	1	1
High	Master Protein	A0A5P0JCC8	Succinate--CoA ligase [ADP-forming] subunit beta OS=Escherichia coli OX=562 GN=sucC PE=3 SV=1	FALSE	2.494	5	1	1	1	388	41.3	5.41	0	1	1
High	Master Protein	A0A6M0PX68	50S ribosomal protein L30 OS=Escherichia coli OX=562 GN=rpmD PE=3 SV=1	FALSE	2.485	15	1	1	1	59	6.5	10.59	1.91	1	1
High	Master Protein	A0A454S413	Uncharacterized protein OS=Escherichia coli OX=562 GN=BvCmsOUP014_03559 PE=4 SV=1	FALSE	2.482	9	1	1	1	91	10	9.38	1.95	1	1
High	Master Protein	A0A2T3SWT9	Uncharacterized protein OS=Escherichia coli OX=562 GN=C7B02_24915 PE=4 SV=1	FALSE	2.459	4	1	1	1	262	30.3	6.99	1.99	1	1
High	Master Protein	A0A4C4IGI0	Glutathione synthetase OS=Escherichia coli OX=562 GN=gshB PE=3 SV=1	FALSE	2.442	5	1	1	1	316	35.5	5.3	0	1	1
High	Master Protein	A0A7U0NTB5	Efflux RND transporter permease AcrB OS=Escherichia coli OX=562 GN=acrB PE=4 SV=1	FALSE	2.433	1	1	2	1	1049	113.5	5.58	2.15	1	1
High	Master Protein	D3QSR1	STAS domain-containing protein OS=Escherichia coli O55:H7 (strain CB9615 / EPEC) OX=701177 GN=yrbB PE=4 SV=1	FALSE	2.412	9	1	1	1	129	14.4	5.27	0	1	1
High	Master Protein	A0A7D5GRR9	50S ribosomal protein L21 OS=Escherichia coli OX=562 GN=rplU PE=3 SV=1	FALSE	2.357	10	1	1	1	103	11.6	10.05	2.46	1	1
High	Master Protein	A0A2X3JM76	Major tail tube protein OS=Escherichia coli OX=562 GN=E2863_05551 PE=4 SV=1	FALSE	2.356	3	1	1	1	235	25.6	6.87	1.97	1	1
High	Master Protein	A0A1M2G3F6	Cell shape protein MreC OS=Escherichia coli OX=562 GN=mreC PE=3 SV=1	FALSE	2.347	4	1	1	1	367	39.6	8.41	2.3	1	1
High	Master Protein	A0A074HPQ9	Cell division protein FtsP OS=Escherichia coli 1-392-07_S4_C1 OX=1444219 GN=sufI PE=3 SV=1	FALSE	2.342	4	1	1	1	470	51.8	6.34	0	1	1
High	Master Protein	A0A793U1U5	ADP-L-glycero-D-manno-heptose-6-epimerase OS=Escherichia coli OX=562 GN=rfaD PE=3 SV=1	FALSE	2.316	4	1	1	1	310	34.9	4.88	0	1	1
High	Master Protein	A0A5P0Z3R5	Electron transport protein HydN OS=Escherichia coli OX=562 GN=hydN PE=4 SV=1	FALSE	2.309	5	1	1	1	175	19.1	7.88	1.84	1	1
High	Master Protein	Q6JZI0	Isocitrate dehydrogenase [NADP] (Fragment) OS=Escherichia coli OX=562 GN=icd PE=4 SV=1	FALSE	2.29	3	1	1	1	389	42.8	5.22	0	1	1
High	Master Protein	A0A660GQR8	Autotransporter adhesin EhaA OS=Escherichia coli OX=562 GN=ehaA PE=4 SV=1	FALSE	2.283	1	1	1	1	1327	140.8	5.24	0	1	1
High	Master Protein	A0A3W4D711	Leucine--tRNA ligase OS=Escherichia coli OX=562 GN=leuS PE=3 SV=1	FALSE	2.261	1	1	1	1	860	97.2	5.24	2.13	1	1
High	Master Protein	A0A1V2GIE9	Apolipoprotein N-acyltransferase OS=Escherichia coli OX=562 GN=lnt PE=3 SV=1	FALSE	2.26	2	1	1	1	512	57	9.41	2.32	1	1
High	Master Protein	D8AFL5	Oligoribonuclease OS=Escherichia coli (strain MS 21-1) OX=749527 GN=orn PE=3 SV=1	FALSE	2.252	6	1	1	1	199	22.9	5.03	2.75	1	1
High	Master Protein	A0A3T9EJ56	Pyridoxamine 5'-phosphate oxidase (Fragment) OS=Escherichia coli OX=562 GN=DNI21_28045 PE=4 SV=1	FALSE	2.22	7	1	1	1	127	14.7	7.56	2.51	1	1
High	Master Protein	A0A6C9G536	F0F1 ATP synthase subunit alpha (Fragment) OS=Escherichia coli OX=562 GN=GKG12_26605 PE=3 SV=1	FALSE	2.212	5	1	1	1	199	21.6	5.19	2.47	1	1
High	Master Protein	A0A0K4NDR3	Cys-tRNA(Pro)/Cys-tRNA(Cys) deacylase OS=Escherichia coli OX=562 GN=ybaK PE=3 SV=1	FALSE	2.205	10	1	1	1	159	17.1	9.04	0	1	1
High	Master Protein	A0A6M0PZM1	Translational regulator CsrA OS=Escherichia coli OX=562 GN=csrA PE=3 SV=1	FALSE	2.201	11	1	1	1	61	6.9	8.62	2.3	1	1
High	Master Protein	A0A6M0PN65	Cell division topological specificity factor OS=Escherichia coli OX=562 GN=minE PE=3 SV=1	FALSE	2.2	13	1	1	1	89	10.3	5.24	0	1	1
High	Master Protein	A0A193LR84	ATP-dependent Clp protease proteolytic subunit OS=Escherichia coli OX=562 GN=DXT69_22725 PE=3 SV=1	FALSE	2.197	2	1	1	1	651	70.5	5.38	0	1	1
High	Master Protein	A0A6M0PWK4	Molybdate ABC transporter substrate-binding protein OS=Escherichia coli OX=562 GN=modA PE=3 SV=1	FALSE	2.177	7	1	1	1	256	27.6	8.62	0	1	1
High	Master Protein	B7MGD4	Chromate reductase, Class I, flavoprotein OS=Escherichia coli O45:K1 (strain S88 / ExPEC) OX=585035 GN=yieF PE=4 SV=1	FALSE	2.174	13	1	1	1	188	20.4	5.15	0	1	1
High	Master Protein	A0A5P0ZDX9	Pyridoxal-phosphate dependent enzyme (Fragment) OS=Escherichia coli OX=562 GN=E4K60_25570 PE=4 SV=1	FALSE	2.169	10	1	1	1	196	21	5.74	1.74	1	1
High	Master Protein	A0A7U8LV06	ECA polysaccharide chain length modulation protein OS=Escherichia coli O11 OX=1095705 GN=wzzE PE=4 SV=1	FALSE	2.167	3	1	1	1	348	39.4	6.65	2.09	1	1
High	Master Protein	K4XKD1	Peptide methionine sulfoxide reductase MsrB OS=Escherichia coli O111:H8 str. CVM9634 OX=1165944 GN=msrB PE=3 SV=1	FALSE	2.161	8	1	1	1	137	15.4	5.47	0	1	1
High	Master Protein	A0A2T3T356	Cation transport regulator OS=Escherichia coli OX=562 GN=chaB PE=4 SV=1	FALSE	2.144	9	1	1	1	76	9	7.06	2.66	1	1
High	Master Protein	A0A6M0PGN1	30S ribosomal protein S17 OS=Escherichia coli OX=562 GN=rpsQ PE=3 SV=1	FALSE	2.131	10	1	2	1	84	9.6	9.77	3.86	1	1
High	Master Protein	A0A073UQE0	ADP-ribose diphosphatase OS=Escherichia coli 5-366-08_S1_C1 OX=1444047 GN=AB08_2146 PE=3 SV=1	FALSE	2.126	5	1	1	1	137	15.1	4.75	2.21	1	1
High	Master Protein	W1F5H5	Outer membrane pore protein E OS=Escherichia coli ISC7 OX=1432555 PE=3 SV=1	FALSE	2.104	3	1	1	1	245	27.3	4.74	2.19	1	1
High	Master Protein	A0A6M0PMM2	Negative modulator of initiation of replication OS=Escherichia coli OX=562 GN=seqA PE=3 SV=1	FALSE	2.092	6	1	1	1	190	20.9	8.38	0	1	1
High	Master Protein	A0A1Q4PF61	NiFe hydrogenase OS=Escherichia coli OX=562 GN=BMT49_07565 PE=3 SV=1	FALSE	2.086	5	1	1	1	372	40.6	7.14	0	1	1
High	Master Protein	A0A7L7X7T0	Addiction module toxin, GnsA/GnsB family OS=Escherichia coli O18ac:H14 OX=2773705 GN=IEC99_15115 PE=4 SV=1	FALSE	2.068	23	1	1	1	57	6.6	5.4	0	1	1
High	Master Protein	A0A7U9AWC9	Uncharacterized protein OS=Escherichia coli TA206 OX=656440 GN=ECKG_00943 PE=4 SV=1	FALSE	2.054	24	1	1	1	38	4.2	8.62	2.48	1	1
High	Master Protein	U9XFY1	Glycerol kinase OS=Escherichia coli 113290 OX=1268976 GN=glpK PE=3 SV=1	FALSE	2.046	3	1	1	1	509	56.9	5.5	1.74	1	1
High	Master Protein	Q8XEH1	Uncharacterized protein OS=Escherichia coli O157:H7 OX=83334 GN=yffB PE=3 SV=1	FALSE	2.02	18	1	1	1	118	13.6	7.28	0	1	1
High	Master Protein	A0A3Y1HYH2	Phage tail protein (Fragment) OS=Escherichia coli OX=562 GN=E2119_26665 PE=4 SV=1	FALSE	2.005	21	1	1	1	33	3.7	8.21	2.14	1	1
High	Master Protein	sp	ALDOA_RABIT	TRUE	2.002	2	1	1	1	360	38.8	8.09	2.49	1	1
High	Master Protein	F4NIT0	GroES-like protein OS=Escherichia coli D9 OX=556266 GN=SSJG_02075 PE=3 SV=1	FALSE	1.984	3	1	1	1	357	39.2	6.1	1.97	1	1
High	Master Protein	sp	PEPA_BOVIN	TRUE	1.982	2	1	1	1	372	40	4.25	2.26	1	1
High	Master Protein	A0A4C3QGH9	Uncharacterized protein OS=Escherichia coli OX=562 GN=BvCmsHHP019_03734 PE=4 SV=1	FALSE	1.977	6	1	1	1	167	17.4	9.33	1.75	1	1
High	Master Protein	A0A1X3KQA3	Peptidoglycan D,D-transpeptidase MrdA OS=Escherichia coli H605 OX=656410 GN=mrdA PE=3 SV=1	FALSE	1.969	2	1	1	1	633	70.8	8.82	0	1	1
High	Master Protein	D6IHI9	Regulator of ribonuclease activity B OS=Escherichia coli B185 OX=550676 GN=rraB PE=3 SV=1	FALSE	1.953	5	1	1	1	138	15.5	3.81	2.12	1	1
High	Master Protein	A0A418UE53	Glutamine--tRNA ligase OS=Escherichia coli OX=562 GN=glnS PE=3 SV=1	FALSE	1.922	1	1	1	1	553	63.4	6.46	0	1	1
High	Master Protein	A0A7I8ZZL6	Phosphofructokinase OS=Escherichia coli OX=562 GN=pfkB PE=3 SV=1	FALSE	1.882	3	1	1	1	309	32.5	5.5	2.13	1	1
High	Master Protein	A0A6M0PS24	Leucine-responsive transcriptional regulator Lrp OS=Escherichia coli OX=562 GN=lrp PE=4 SV=1	FALSE	1.865	7	1	1	1	164	18.9	8.78	2.36	1	1
High	Master Protein	A0A4Q0F7V7	LexA repressor OS=Escherichia coli OX=562 GN=lexA PE=3 SV=1	FALSE	1.864	5	1	1	1	202	22.4	7.06	2.37	1	1
High	Master Protein	A0A6L9C103	Methionine adenosyltransferase domain-containing protein (Fragment) OS=Escherichia coli OX=562 GN=GUB95_24580 PE=4 SV=1	FALSE	1.855	15	1	1	1	61	6.9	6.52	1.89	1	1
High	Master Protein	A0A792STI6	Flagellar L-ring protein OS=Escherichia coli OX=562 GN=flgH PE=3 SV=1	FALSE	1.829	4	1	1	1	232	24.6	8.15	1.79	1	1
High	Master Protein	A0A376KYU3	Peptidyl-prolyl cis-trans isomerase OS=Escherichia coli OX=562 GN=ppiB PE=3 SV=1	FALSE	1.827	6	1	1	1	157	17.6	8.44	2.39	1	1
High	Master Protein	A0A0J2HEC2	Inner membrane protein OS=Escherichia coli OX=562 GN=yrfF PE=3 SV=1	FALSE	1.812	2	1	1	1	707	79	6.09	0	1	1
High	Master Protein	A0A4Q8DRI3	Terminase OS=Escherichia coli OX=562 GN=EXX87_25800 PE=4 SV=1	FALSE	1.811	2	1	1	1	494	55.5	7.81	1.82	1	1
High	Master Protein	A0A2R4AB48	Uncharacterized protein OS=Escherichia coli OX=562 GN=CCZ17_25060 PE=4 SV=1	FALSE	1.761	5	1	2	1	131	15.6	9.79	4.39	1	1
High	Master Protein	D7ZJL9	Transcriptional repressor FrmR OS=Escherichia coli MS 69-1 OX=749531 GN=frmR PE=3 SV=1	FALSE	1.761	15	1	1	1	107	12.2	6.11	0	1	1
High	Master Protein	A0A2S8JS47	Aldo/keto reductase family oxidoreductase OS=Escherichia coli OX=562 GN=ydhF PE=4 SV=1	FALSE	1.76	4	1	1	1	298	33.6	6.18	1.94	1	1
High	Master Protein	A0A7L7WVC2	Uncharacterized protein OS=Escherichia coli O15:H12 OX=2773704 GN=IED00_03630 PE=4 SV=1	FALSE	1.759	1	1	1	1	609	67.4	8.1	1.92	1	1
High	Master Protein	A0A2H9A5A1	AAA family ATPase OS=Escherichia coli OX=562 GN=ftsH_2 PE=4 SV=1	FALSE	1.75	2	1	1	1	328	37.1	8.25	2.99	1	1
High	Master Protein	A0A0K4T520	Uncharacterized protein conserved in bacteria OS=Escherichia coli OX=562 GN=ERS085411_03610 PE=4 SV=1	FALSE	1.748	7	1	1	1	107	12	9.57	1.88	1	1
High	Master Protein	A0A1X3KET9	Putative cytoplasmic protein OS=Escherichia coli H605 OX=656410 GN=EATG_03568 PE=4 SV=1	FALSE	1.736	16	1	2	1	68	7.9	7.83	2.06	1	1
High	Master Protein	A0A029HNI8	2-C-methyl-D-erythritol 2,4-cyclodiphosphate synthase OS=Escherichia coli 2-005-03_S4_C3 OX=1444258 GN=ispF PE=3 SV=1	FALSE	1.718	14	1	1	1	159	16.9	6.52	0	1	1
High	Master Protein	B7N9I3	Uncharacterized protein OS=Escherichia coli O17:K52:H18 (strain UMN026 / ExPEC) OX=585056 GN=ybdF PE=4 SV=1	FALSE	1.704	9	1	1	1	167	19.2	9.45	0	1	1
High	Master Protein	A0A6M0PX72	50S ribosomal protein L5 OS=Escherichia coli OX=562 GN=rplE PE=3 SV=1	FALSE	1.696	6	1	1	1	179	20.2	9.51	2.33	1	1
High	Master Protein	A0A6H1Q4R4	Error-prone, lesion bypass DNA polymerase V (UmuC) OS=Escherichia coli OX=562 PE=3 SV=1	FALSE	1.69	4	1	1	1	395	43.3	9.7	1.83	1	1
High	Master Protein	A0A7U9B6G6	Putative deoxyribonuclease YcfH OS=Escherichia coli TA143 OX=656437 GN=ECMG_02239 PE=4 SV=1	FALSE	1.688	3	1	1	1	265	29.8	5.52	2.46	1	1
High	Master Protein	A0A2A3V6H8	Glucose-1-phosphate adenylyltransferase OS=Escherichia coli OX=562 GN=glgC PE=3 SV=1	FALSE	1.68	2	1	1	1	431	48.7	6.14	0	1	1
High	Master Protein	A0A5F1E1I2	Metalloprotein OS=Escherichia coli OX=562 GN=CQB02_06135 PE=4 SV=1	FALSE	1.677	5	1	1	1	135	15.5	6.52	1.78	1	1
High	Master Protein	D6JDS1	Predicted protein OS=Escherichia coli B354 OX=550677 GN=ECEG_04315 PE=4 SV=1	FALSE	1.658	5	1	1	1	165	18.5	7.91	2.38	1	1
High	Master Protein	D8A1L1	Protein translocase subunit SecY OS=Escherichia coli (strain MS 21-1) OX=749527 GN=secY PE=3 SV=1	FALSE	1.601	2	1	1	1	443	48.5	9.89	2.37	1	1
High	Master Protein	A0A7I8Z247	GMP synthase [glutamine-hydrolyzing] OS=Escherichia coli OX=562 GN=guaA PE=3 SV=1	FALSE	1.6	4	1	1	1	525	58.6	5.45	0	1	1
High	Master Protein	A0A0K3R644	L-arabinose-binding periplasmic protein OS=Escherichia coli OX=562 GN=araF PE=3 SV=1	FALSE	1.596	2	1	1	1	329	35.5	6.96	2.47	1	1
High	Master Protein	A0A4D3RT81	Uncharacterized protein OS=Escherichia coli OX=562 GN=BvCmsSIP024_03496 PE=4 SV=1	FALSE	1.573	5	1	1	1	135	15.6	7.18	2.32	1	1
High	Master Protein	A0A5C9AHF7	P-II family nitrogen regulator (Fragment) OS=Escherichia coli OX=562 GN=FWK02_18300 PE=3 SV=1	FALSE	1.555	16	1	1	1	70	7.8	4.67	0	1	1
High	Master Protein	A0A6M0PUF1	Muramidase FlgJ OS=Escherichia coli OX=562 GN=flgJ PE=3 SV=1	FALSE	1.555	3	1	1	1	312	33.7	6.57	1.84	1	1
High	Master Protein	A0A0K4SQT8	Methionine--tRNA ligase OS=Escherichia coli OX=562 GN=metG PE=3 SV=1	FALSE	1.532	2	1	1	1	677	76.6	6.06	0	1	1
High	Master Protein	A0A0E1L6G5	Hypothetical protein OS=Escherichia coli OX=562 GN=AC789_1c06000 PE=4 SV=1	FALSE	1.511	10	1	1	1	73	8.4	5.06	2.33	1	1
High	Master Protein	A0A478FYJ0	IS91 transposase OS=Escherichia coli OX=562 GN=BvCms12BK_00843 PE=4 SV=1	FALSE	1.51	9	1	1	1	81	9.3	9.39	2.28	1	1
High	Master Protein	A0A789J1G9	Colicin-10 OS=Escherichia coli OX=562 GN=HIO12_004700 PE=3 SV=1	FALSE	1.482	2	1	1	1	490	53.1	5.53	1.75	1	1
High	Master Protein	E9YZZ0	GracC OS=Escherichia coli M863 OX=656420 GN=ERJG_04093 PE=4 SV=1	FALSE	1.476	9	1	1	1	91	9.9	6.54	1.67	1	1
High	Master Protein	A0A7I9ABH3	UPF0412 protein YaaI OS=Escherichia coli OX=562 GN=yaaI PE=3 SV=1	FALSE	1.462	10	1	1	1	134	14.6	7.81	0	1	1
High	Master Protein	A0A7U9AWH8	Periplasmic oligopeptide-binding protein OS=Escherichia coli TA206 OX=656440 GN=ECKG_01101 PE=4 SV=1	FALSE	1.461	36	1	1	1	25	2.9	8.62	2.06	1	1
High	Master Protein	A0A6M0PBX2	Alkanesulfonate monooxygenase OS=Escherichia coli OX=562 GN=ssuD PE=3 SV=1	FALSE	1.457	4	1	1	1	390	42.3	6.02	2.54	1	1
High	Master Protein	E9XML5	Uncharacterized protein OS=Escherichia coli TW10509 OX=656449 GN=ERFG_02312 PE=4 SV=1	FALSE	1.456	7	1	1	1	125	13.8	7.02	0	1	1
High	Master Protein	M9GY41	von Willebrand factor type A domain protein OS=Escherichia coli MP021561.2 OX=1116136 GN=ECMP0215612_5329 PE=4 SV=1	FALSE	1.45	2	1	1	1	376	41.2	5.62	2.18	1	1
High	Master Protein	A0A5C8XX30	Adhesin-like autotransporter YpjA OS=Escherichia coli OX=562 GN=ypjA PE=4 SV=1	FALSE	1.434	1	1	1	1	1512	155.9	5.26	0	1	1
High	Master Protein	F4TG01	Dipeptide ABC transporter, permease protein DppA OS=Escherichia coli M718 OX=656419 GN=ECJG_02394 PE=3 SV=1	FALSE	1.416	1	1	1	1	486	54.4	6.1	1.87	1	1
High	Master Protein	A0A7Z1XCH4	DUF2726 domain-containing protein OS=Escherichia coli OX=562 GN=EQO00_04415 PE=4 SV=1	FALSE	1.416	2	1	1	1	722	82.4	8.38	0	1	1
High	Master Protein	A0A271U5M2	Putative ion-transport protein YfeO OS=Escherichia coli OX=562 GN=yfeO PE=3 SV=1	FALSE	1.407	8	1	1	1	418	43.7	9.07	0	1	1
High	Master Protein	A0A1X3KZN9	6-phospho-beta-glucosidase BglA OS=Escherichia coli H420 OX=656400 GN=EAVG_01554 PE=3 SV=1	FALSE	1.405	2	1	1	1	363	42.4	5.5	2.05	1	1
High	Master Protein	A0A449CD49	ImmA/IrrE family metallo-endopeptidase OS=Escherichia coli OX=562 GN=immA PE=4 SV=1	FALSE	1.393	7	1	1	1	180	20.4	8.47	0	1	1
High	Master Protein	A0A5E9SEH2	Phage late control D family protein OS=Escherichia coli OX=562 GN=E2129_18605 PE=4 SV=1	FALSE	1.388	3	1	1	1	369	41.2	5.67	0	1	1
High	Master Protein	A0A3K2PEF4	Uncharacterized protein OS=Escherichia coli OX=562 GN=D7Y10_26975 PE=4 SV=1	FALSE	1.379	18	1	1	1	94	10.1	9.09	0	1	1
High	Master Protein	A0A6C7CL09	DNA-binding protein YbiB OS=Escherichia coli OX=562 GN=trpD2 PE=4 SV=1	FALSE	1.378	7	1	1	1	320	35	6.86	0	1	1
High	Master Protein	A0A0K4GRI2	Electron transfer flavoprotein subunit alpha OS=Escherichia coli OX=562 GN=etfA_1 PE=3 SV=1	FALSE	1.375	2	1	1	1	314	33.9	7.33	1.73	1	1

## Sheet: Table S3
Protein FDR Confidence: Combined	Master	Accession	Description	Contaminant	Sum PEP Score	Coverage [%]	# Peptides	# PSMs	# Unique Peptides	# AAs	MW [kDa]	calc. pI	Score Sequest HT: Sequest HT	# Peptides (by Search Engine): Sequest HT	# Protein Groups
High	Master Protein	extdb	flagellin FliC [Escherichia coli]	FALSE	650.979	97	44	1043	2	497	52	5.05	2450.99	44	1
High	Master Protein	A0A0K5Y601	Flagellin OS=Escherichia coli OX=562 GN=C9E25_12260 PE=3 SV=1	FALSE	635.189	95	44	1036	2	497	52	5.08	2426.3	44	1		63-65
High	Master Protein	A0A6L2GKU6	Lipoprotein metalloprotease SslE (Fragment) OS=Escherichia coli OX=562 GN=sslE PE=4 SV=1	FALSE	383.898	43	47	92	47	1516	167.4	5.06	242.12	47	1
High	Master Protein	D7XL32	Gram-negative porin OS=Escherichia coli MS 84-1 OX=749533 GN=HMPREF9536_01722 PE=3 SV=1	FALSE	299.081	89	23	220	3	367	40.4	4.82	488.24	23	1
High	Master Protein	A0A399VL82	Outer membrane protein assembly factor BamC OS=Escherichia coli OX=562 GN=bamC PE=3 SV=1	FALSE	291.456	85	17	93	1	344	36.8	5.57	226.22	17	1
High	Master Protein	D7ZI93	Outer membrane protein assembly factor BamC OS=Escherichia coli MS 69-1 OX=749531 GN=bamC PE=3 SV=1	FALSE	278.594	82	17	83	1	344	36.8	5.57	223.25	17	1
High	Master Protein	D7Y4X5	Gram-negative porin OS=Escherichia coli (strain MS 115-1) OX=749537 GN=HMPREF9540_02631 PE=3 SV=1	FALSE	276.661	84	21	188	1	367	40.4	4.82	429.83	21	1
High	Master Protein	A0A0H3MH67	Aldehyde-alcohol dehydrogenase OS=Escherichia coli O7:K1 (strain IAI39 / ExPEC) OX=585057 GN=adhE PE=3 SV=1	FALSE	246.209	53	33	57	23	891	96.1	6.79	157.87	33	1
High	Master Protein	A0A2Y0TBT9	Maltodextrin-binding protein OS=Escherichia coli OX=562 GN=malE PE=3 SV=1	FALSE	242.11	71	22	116	10	396	43.4	5.71	258.44	22	1
High	Master Protein	A0A5N2LAM1	Elongation factor Ts OS=Escherichia coli OX=562 GN=tsf PE=3 SV=1	FALSE	237.771	86	22	107	1	283	30.4	5.29	226.91	22	1
High	Master Protein	A0A2W6NZV0	Phosphoglycerate kinase OS=Escherichia coli OX=562 GN=pgk PE=3 SV=1	FALSE	234.849	72	19	57	19	382	40.5	5.29	137.02	19	1
High	Master Protein	A0A6C9FWZ0	60 kDa chaperonin OS=Escherichia coli OX=562 GN=groL PE=3 SV=1	FALSE	234.593	59	24	82	24	548	57.3	4.94	198.63	24	1
High	Master Protein	A0A6N9S2P9	Elongation factor Ts OS=Escherichia coli OX=562 GN=tsf PE=3 SV=1	FALSE	233.883	85	22	102	1	283	30.4	5.29	223.32	22	1
High	Master Protein	A0A163CXN4	ATP synthase subunit beta OS=Escherichia coli OX=562 GN=atpD PE=3 SV=1	FALSE	231.924	71	22	62	22	460	50.3	5.01	168.54	22	1
High	Master Protein	A0A6G6KVW9	Enolase OS=Escherichia coli OX=562 GN=eno PE=3 SV=1	FALSE	231.458	75	20	62	1	432	45.7	5.4	156.52	20	1
High	Master Protein	A0A0B1MQ83	ATP synthase subunit alpha OS=Escherichia coli OX=562 GN=atpA PE=3 SV=1	FALSE	228.872	59	23	65	23	513	55.1	5.96	156.9	23	1
High	Master Protein	A0A0V7X3S8	Aspartate ammonia-lyase OS=Escherichia coli OX=562 GN=aspA PE=3 SV=1	FALSE	223.889	69	23	60	23	478	52.3	5.22	150.12	23	1
High	Master Protein	F4T4B5	Enolase OS=Escherichia coli M605 OX=656417 GN=eno PE=3 SV=1	FALSE	220.532	75	20	61	1	432	45.7	5.48	150.57	20	1
High	Master Protein	A0A3T9E4X1	Outer membrane protein assembly factor BamA OS=Escherichia coli OX=562 GN=bamA PE=3 SV=1	FALSE	219.865	45	26	62	26	810	90.5	5.12	150.53	26	1
High	Master Protein	A0A5P1Q2J6	Elongation factor G OS=Escherichia coli OX=562 GN=fusA PE=3 SV=1	FALSE	218.546	55	26	62	26	704	77.5	5.38	144.36	26	1
High	Master Protein	A0A4C9BVH3	D-ribose transporter subunit RbsB OS=Escherichia coli OX=562 GN=rbsB_1 PE=4 SV=1	FALSE	209.646	75	16	101	16	296	30.9	7.47	233.81	16	1
High	Master Protein	A0A7B4KCG4	Chaperone protein DnaK OS=Escherichia coli OX=562 GN=dnaK PE=2 SV=1	FALSE	208.938	60	27	49	27	638	69.1	4.97	125.67	27	1
High	Master Protein	A0A0E1LF30	Vitamin B12 transporter BtuB OS=Escherichia coli OX=562 GN=btuB PE=3 SV=1	FALSE	205.955	61	23	50	23	628	69.9	5.67	133.69	23	1
High	Master Protein	C3TPR4	Periplasmic serine endoprotease DegP-like OS=Escherichia coli OX=562 GN=degP PE=3 SV=1	FALSE	204.594	55	18	57	1	474	49.3	8.56	164.63	18	1
High	Master Protein	A0A3T8TUF2	Periplasmic serine endoprotease DegP-like OS=Escherichia coli OX=562 GN=degP PE=3 SV=1	FALSE	201.49	57	18	58	1	474	49.3	8.56	160.43	18	1
High	Master Protein	F4SLJ3	Glutamine-binding periplasmic protein (GlnBP) OS=Escherichia coli H736 OX=656414 GN=ECHG_00585 PE=3 SV=1	FALSE	195.249	69	17	101	2	248	27.2	8.1	232.71	17	1
High	Master Protein	A0A070FG57	Glycerophosphodiester phosphodiesterase OS=Escherichia coli O128:H2 str. 2011C-3317 OX=1446581 GN=glpQ PE=4 SV=1	FALSE	188.049	49	14	57	14	358	40.8	5.83	144.37	14	1
High	Master Protein	A0A066R5X0	Hypothetical protein OS=Escherichia coli OX=562 GN=cysP PE=3 SV=1	FALSE	184.918	65	21	67	19	338	37.6	8.53	165.54	21	1
High	Master Protein	E9XKB2	Glutamate decarboxylase OS=Escherichia coli TW10509 OX=656449 GN=ERFG_01861 PE=3 SV=1	FALSE	183.976	60	18	50	0	466	52.7	5.49	117.15	18	1
High	Master Protein	A0A7I8Y789	30S ribosomal protein S1 OS=Escherichia coli OX=562 GN=rpsA PE=3 SV=1	FALSE	180.093	49	23	48	23	557	61	5	133.45	23	1
High	Master Protein	A0A3W4K7L3	Autotransporter adhesin Ag43 (Fragment) OS=Escherichia coli OX=562 GN=ag43 PE=4 SV=1	FALSE	177.962	42	20	46	3	861	87.9	6.09	113.33	20	1
High	Master Protein	A0A024L4C3	Outer membrane protein A OS=Escherichia coli OX=562 GN=ompA PE=3 SV=1	FALSE	177.458	60	16	137	16	365	39.6	6.71	257.72	16	1
High	Master Protein	A0A2W6Q9I3	Maltodextrin-binding protein (Fragment) OS=Escherichia coli OX=562 GN=DNQ45_09415 PE=3 SV=1	FALSE	173.95	72	13	80	1	242	26.4	5.24	176.82	13	1
High	Master Protein	A0A069XHV1	Glutamate/aspartate periplasmic-binding protein OS=Escherichia coli 3-373-03_S4_C2 OX=1444252 GN=gltI PE=4 SV=1	FALSE	166.321	59	14	51	14	302	33.4	8.27	133.51	14	1
High	Master Protein	A0A0F3T8E6	Molecular chaperone OS=Escherichia coli OX=562 GN=ppiD PE=4 SV=1	FALSE	163.51	55	22	43	22	623	68.1	5.02	104.04	22	1
High	Master Protein	A0A0H2UL03	Thiol:disulfide interchange protein OS=Escherichia coli (strain B / BL21-DE3) OX=469008 PE=1 SV=1	FALSE	160.649	68	11	84	1	189	21.1	5.63	186.57	11	1
High	Master Protein	A0A6M1ITU6	Arginine ABC transporter substrate-binding protein OS=Escherichia coli OX=562 GN=artJ PE=3 SV=1	FALSE	160.635	79	16	60	11	243	26.9	6.6	135.92	16	1
High	Master Protein	A0A1X3IEA9	Thiol:disulfide interchange protein DsbA OS=Escherichia coli E1114 OX=550691 GN=EADG_04238 PE=3 SV=1	FALSE	160.228	86	11	82	1	150	16.6	7.39	183.79	11	1
High	Master Protein	A0A4C4I0G6	Periplasmic glutamine-binding protein OS=Escherichia coli OX=562 GN=glnH PE=4 SV=1	FALSE	159.594	64	16	76	1	248	27.2	8.51	158	16	1
High	Master Protein	A0A0E1IMV9	Pyruvate kinase OS=Escherichia coli OX=562 GN=pykF PE=3 SV=1	FALSE	156.68	56	20	45	20	470	50.6	5.97	100.55	20	1
High	Master Protein	J7QY25	UDP-sugar hydrolase (5'-nucleotidase) (Fragment) OS=Escherichia coli OX=562 GN=ushA PE=3 SV=1	FALSE	154.275	49	18	47	18	541	59.8	5.54	105.9	18	1
High	Master Protein	A0A0K9T8Z5	Putrescine-binding periplasmic protein OS=Escherichia coli M114 OX=656416 GN=ERYG_03875 PE=3 SV=1	FALSE	151.973	59	17	53	17	348	38.8	5.39	104.3	17	1
High	Master Protein	A0A0F3TG37	DUF945 domain-containing protein OS=Escherichia coli OX=562 GN=ydgA PE=4 SV=1	FALSE	150.207	46	18	44	18	502	54.8	5.17	106.9	18	1
High	Master Protein	A0A3K0JXD4	Cystine ABC transporter substrate-binding protein OS=Escherichia coli OX=562 GN=tcyJ PE=3 SV=1	FALSE	147.426	73	19	48	19	266	29	6.64	104.92	19	1
High	Master Protein	P76177	Protein YdgH OS=Escherichia coli (strain K12) OX=83333 GN=ydgH PE=1 SV=1	FALSE	144.505	67	19	57	19	314	33.9	9.28	128.02	19	1
High	Master Protein	A0A2W6P0D8	Glutamine ABC transporter substrate-binding protein GlnH (Fragment) OS=Escherichia coli OX=562 GN=DNQ45_27055 PE=4 SV=1	FALSE	144.189	75	14	96	1	175	19.2	8.91	212.21	14	1
High	Master Protein	A0A786ZMQ2	50S ribosomal protein L1 OS=Escherichia coli OX=562 GN=rplA PE=3 SV=1	FALSE	142.899	53	11	48	11	234	24.7	9.64	112.57	11	1
High	Master Protein	A0A0H2YZI9	Glyceraldehyde-3-phosphate dehydrogenase OS=Escherichia coli O1:K1 / APEC OX=405955 GN=gapA PE=3 SV=1	FALSE	142.174	70	18	73	17	334	35.9	6.8	163.59	18	1
High	Master Protein	Q75SX7	Flagellin OS=Escherichia coli OX=562 GN=flkA53 PE=3 SV=1	FALSE	140.474	36	10	136	2	423	44.9	5.34	401.69	10	1
High	Master Protein	A0A444R4Y5	Molecular chaperone OsmY (Fragment) OS=Escherichia coli OX=562 GN=osmY PE=4 SV=1	FALSE	139.647	72	10	154	2	173	18.2	5.67	372.71	10	1
High	Master Protein	A0A6G1XP11	Autotransporter adhesin Ag43 OS=Escherichia coli OX=562 GN=ag43 PE=4 SV=1	FALSE	139.583	31	18	41	1	1039	106.9	6.09	96.37	18	1
High	Master Protein	A0A3R0UH32	Flagellar hook protein FlgE OS=Escherichia coli OX=562 GN=flgE PE=3 SV=1	FALSE	139.343	58	11	32	11	401	42	4.68	74.11	11	1
High	Master Protein	E9XUP7	Glutamine synthetase OS=Escherichia coli TW10509 OX=656449 GN=ERFG_04801 PE=3 SV=1	FALSE	138.294	56	18	40	18	469	51.9	5.53	95.75	18	1
High	Master Protein	A0A5C9AMR2	Flagellin (Fragment) OS=Escherichia coli OX=562 GN=FWK02_12705 PE=3 SV=1	FALSE	137.498	26	11	213	2	572	59	4.94	454.66	11	1
High	Master Protein	A0A6C9G4P1	Flagellin OS=Escherichia coli OX=562 GN=GKG12_25795 PE=3 SV=1	FALSE	137.354	27	10	197	2	373	39.7	4.58	420.52	10	1
High	Master Protein	extdb	porin [Escherichia coli]	FALSE	134.988	56	15	72	12	365	40.3	4.87	149.33	15	1
High	Master Protein	D3QUE6	Acid stress chaperone HdeB OS=Escherichia coli O55:H7 (strain CB9615 / EPEC) OX=701177 GN=hdeB PE=3 SV=1	FALSE	134.933	61	6	187	3	112	12.5	7.12	438.89	6	1
High	Master Protein	A0A454A9S6	Thiol:disulfide interchange protein OS=Escherichia coli O6:K15:H31 (strain 536 / UPEC) OX=362663 GN=ECP_4070 PE=3 SV=1	FALSE	134.799	53	10	80	1	208	23.1	6.34	171.19	10	1
High	Master Protein	A0A066RGX5	Thiol:disulfide interchange protein OS=Escherichia coli OX=562 GN=dsbC PE=3 SV=1	FALSE	134.389	70	11	48	11	236	25.6	6.79	110.15	11	1
High	Master Protein	D8ECJ6	Malate dehydrogenase OS=Escherichia coli MS 119-7 OX=679206 GN=mdh PE=3 SV=1	FALSE	133.508	78	14	27	14	334	35	6.38	90.44	14	1
High	Master Protein	Q6VMU9	Flagellin OS=Escherichia coli OX=562 GN=fliC PE=3 SV=1	FALSE	133.023	25	10	201	1	488	51	4.84	427.93	10	1
High	Master Protein	Q1PAE5	Flagellin (Fragment) OS=Escherichia coli OX=562 GN=fliC PE=3 SV=1	FALSE	132.159	30	11	193	2	484	50.7	4.96	396.88	11	1
High	Master Protein	D8E0X7	Chaperone protein HtpG OS=Escherichia coli MS 119-7 OX=679206 GN=htpG PE=3 SV=1	FALSE	128.539	48	24	33	24	624	71.4	5.19	77.07	24	1
High	Master Protein	A0A454A8J3	Peptidyl-prolyl cis-trans isomerase OS=Escherichia coli O6:K15:H31 (strain 536 / UPEC) OX=362663 GN=ECP_3437 PE=3 SV=1	FALSE	127.253	60	14	49	14	270	28.9	8.47	113.49	14	1
High	Master Protein	A0A1M2TW09	Trigger factor OS=Escherichia coli OX=562 GN=tig PE=3 SV=1	FALSE	127.096	53	18	31	18	432	48.1	4.86	79.08	18	1
High	Master Protein	A0A426PRQ7	Oligopeptide ABC transporter substrate-binding protein OppA OS=Escherichia coli OX=562 GN=oppA PE=3 SV=1	FALSE	126.022	55	20	31	20	543	61	6.37	73.87	20	1
High	Master Protein	A0A1L4J2J5	Uncharacterized protein OS=Escherichia coli OX=562 GN=RG28_22270 PE=4 SV=1	FALSE	125.8	68	8	101	1	146	16.6	10.89	196.17	8	1
High	Master Protein	A0A166FGY0	Attaching and effacing protein OS=Escherichia coli OX=562 GN=eae PE=3 SV=1	FALSE	125.237	32	21	41	21	948	103.2	8.98	90.4	21	1
High	Master Protein	A0A7U9BL63	Protein HdeA OS=Escherichia coli H299 OX=656393 GN=ECOG_03053 PE=4 SV=1	FALSE	123.925	55	3	143	1	110	11.9	5.58	550.19	3	1
High	Master Protein	A0A3A6SG42	Acetate kinase OS=Escherichia coli OX=562 GN=ackA PE=3 SV=1	FALSE	119.996	54	13	29	13	400	43.3	6.28	89.31	13	1
High	Master Protein	lcl	[locus_tag=EDL933_4520] [db_xref=GO:0003735,GO:0005622,GO:0005840,GO:0006412] [protein=SSU ribosomal protein S5p (S2e)] [protein_id=AIG70668.1] [location=complement(4267365..4267868)] [gbkey=CDS]	FALSE	119.951	72	9	52	9	167	17.6	10.11	112.11	9	1
High	Master Protein	A0A7D4M9J1	Formate C-acetyltransferase OS=Escherichia coli O10:H32 OX=2603836 GN=pflB PE=3 SV=1	FALSE	118.673	35	18	30	18	760	85.4	5.92	67.59	18	1
High	Master Protein	A0A0F3T4J8	L-asparaginase 2 OS=Escherichia coli OX=562 GN=ansB PE=3 SV=1	FALSE	118.61	46	12	38	2	348	36.8	6.04	95.16	12	1
High	Master Protein	A0A7U9BEV6	Molybdate ABC transporter, periplasmic molybdate-binding protein OS=Escherichia coli TA271 OX=656443 GN=ECLG_03768 PE=4 SV=1	FALSE	118.263	70	16	44	16	257	27.4	7.47	82.69	16	1
High	Master Protein	A0A2S7GEP8	Glutamate decarboxylase (Fragment) OS=Escherichia coli OX=562 GN=C5P44_26435 PE=3 SV=1	FALSE	117.632	69	12	34	1	286	32.2	5.86	72.65	12	1
High	Master Protein	A0A3W4K7I4	GTP-binding protein (Fragment) OS=Escherichia coli OX=562 GN=EAX79_29040 PE=4 SV=1	FALSE	117.232	87	12	31	8	219	24.1	4.88	70.07	12	1
High	Master Protein	A0A6C9SXV5	Dihydrolipoyl dehydrogenase OS=Escherichia coli OX=562 GN=lpdA PE=3 SV=1	FALSE	116.741	50	16	27	16	474	50.6	6.15	76.14	16	1
High	Master Protein	A0A0K4GKI0	Glutamate decarboxylase OS=Escherichia coli OX=562 GN=gadB PE=3 SV=1	FALSE	115.593	50	14	40	1	430	48.6	5.38	81.09	14	1
High	Master Protein	A0A376Q3N1	DUF3313 domain-containing protein OS=Escherichia coli OX=562 GN=DL637_17630 PE=4 SV=1	FALSE	115.586	60	10	30	1	222	24.4	7.91	82.47	10	1
High	Master Protein	A0A5P0PYW3	Porin OmpC OS=Escherichia coli OX=562 GN=EI021_25220 PE=3 SV=1	FALSE	115.315	46	12	116	2	365	40.2	4.69	216.77	12	1
High	Master Protein	A0A3Z7JPJ6	DUF2756 family protein OS=Escherichia coli OX=562 GN=DS143_04595 PE=4 SV=1	FALSE	113.907	68	8	89	1	146	16.6	11.21	175.21	8	1
High	Master Protein	A0A479JH51	Periplasmic L-asparaginase 2 OS=Escherichia coli OX=562 GN=ansB PE=3 SV=1	FALSE	113.378	38	11	36	1	348	36.8	6.04	87.87	11	1
High	Master Protein	A0A7U9G149	Putative periplasmic protein OS=Escherichia coli TA143 OX=656437 GN=ECMG_01833 PE=4 SV=1	FALSE	112.5	71	12	21	12	263	28.2	8.19	60.35	12	1
High	Master Protein	A0A5N3LN06	Fumarate reductase flavoprotein subunit OS=Escherichia coli OX=562 GN=EAM59_16440 PE=3 SV=1	FALSE	111.323	47	21	39	21	602	65.9	6.28	76.73	21	1
High	Master Protein	A0A1X3JKA5	Peptidoglycan-associated protein OS=Escherichia coli H386 OX=656397 GN=pal PE=3 SV=1	FALSE	110.286	65	7	34	1	181	19.7	6.8	75.54	7	1
High	Master Protein	A0A4D3MIT3	Cysteine synthase OS=Escherichia coli OX=562 GN=cysK PE=3 SV=1	FALSE	108.452	60	13	29	13	323	34.5	6.06	79.56	13	1
High	Master Protein	A0A4C4JKH4	DNA-directed RNA polymerase subunit alpha OS=Escherichia coli OX=562 GN=rpoA PE=3 SV=1	FALSE	106.737	57	14	29	14	329	36.5	5.06	61.82	14	1
High	Master Protein	A0A6G8BI70	Porin OmpF OS=Escherichia coli OX=562 GN=ompF PE=3 SV=1	FALSE	106.213	48	14	40	1	362	39.4	4.91	89.22	14	1
High	Master Protein	A0A5E9SB53	L-asparaginase 2 (Fragment) OS=Escherichia coli OX=562 GN=ansB PE=3 SV=1	FALSE	106.078	41	11	33	1	326	34.6	6.38	82.25	11	1
High	Master Protein	A0A070T798	Putative phospholipid-binding protein mlaC OS=Escherichia coli 2-210-07_S3_C3 OX=1444180 GN=AC45_0312 PE=4 SV=1	FALSE	105.281	58	9	37	9	211	23.9	9.45	76.43	9	1
High	Master Protein	A0A1X3L6L1	Thiol:disulfide interchange protein OS=Escherichia coli H420 OX=656400 GN=EAVG_03880 PE=3 SV=1	FALSE	104.195	47	10	24	10	268	29.7	8.25	59.39	10	1
High	Master Protein	A0A0K3W6E5	Peptidoglycan-associated protein OS=Escherichia coli OX=562 GN=pal PE=3 SV=1	FALSE	103.968	68	7	34	1	173	18.8	6.8	72.72	7	1
High	Master Protein	A0A3U0PCJ9	Endolytic peptidoglycan transglycosylase RlpA OS=Escherichia coli OX=562 GN=rlpA PE=3 SV=1	FALSE	103.677	53	12	28	3	362	37.5	5.73	70.5	12	1
High	Master Protein	E2QMK5	Membrane protein OS=Escherichia coli OX=562 GN=slyB PE=4 SV=1	FALSE	102.857	48	7	92	4	155	15.6	8.84	219.02	7	1
High	Master Protein	A0A7Z2UDT0	Multidrug efflux RND transporter periplasmic adaptor subunit AcrA OS=Escherichia coli OX=562 GN=acrA PE=4 SV=1	FALSE	102.71	45	14	31	14	397	42.2	8	68.66	14	1
High	Master Protein	A0A5F1DVD8	DNA-binding protein OS=Escherichia coli OX=562 GN=hns PE=3 SV=1	FALSE	102.199	61	9	45	9	137	15.5	5.47	106.21	9	1
High	Master Protein	M9HFG5	Purine nucleoside phosphorylase DeoD-type OS=Escherichia coli MP021561.2 OX=1116136 GN=deoD PE=3 SV=1	FALSE	101.15	51	11	25	11	239	25.9	5.66	66.71	11	1
High	Master Protein	A0A3T6CWQ9	DUF3313 domain-containing protein OS=Escherichia coli OX=562 GN=DL979_22885 PE=4 SV=1	FALSE	100.131	58	10	28	1	222	24.4	8.62	75.83	10	1
High	Master Protein	A0A5E9SZD2	Molecular chaperone OsmY OS=Escherichia coli OX=562 GN=osmY PE=4 SV=1	FALSE	99.683	50	9	107	1	201	21.1	7.49	247.41	9	1
High	Master Protein	A0A6G4BWX1	Ecotin OS=Escherichia coli OX=562 GN=eco PE=3 SV=1	FALSE	99.301	61	9	27	9	162	18.2	7.12	73.3	9	1
High	Master Protein	A0A6N0IKY2	Acid-activated periplasmic chaperone HdeB OS=Escherichia coli OX=562 GN=hdeB PE=4 SV=1	FALSE	98.68	50	4	132	1	96	10.6	5.1	312.42	4	1
High	Master Protein	B7MRB4	DNA-directed RNA polymerase subunit beta' OS=Escherichia coli O81 (strain ED1a) OX=585397 GN=rpoC PE=3 SV=1	FALSE	98.417	19	18	23	18	1407	155.1	7.08	54.5	18	1
High	Master Protein	A0A271QQA2	C-lysozyme inhibitor OS=Escherichia coli OX=562 GN=ivy PE=3 SV=1	FALSE	97.558	69	7	43	7	157	16.9	6.77	90.86	7	1
High	Master Protein	A0A7U5MX18	F0F1 ATP synthase subunit gamma OS=Escherichia coli OX=562 GN=RM34_10990 PE=4 SV=1	FALSE	96.93	70	14	25	1	287	31.6	8.76	63.59	14	1
High	Master Protein	A0A6M0PT19	Aldehyde-alcohol dehydrogenase OS=Escherichia coli OX=562 GN=adhE PE=3 SV=1	FALSE	96.832	21	11	20	1	889	96.1	6.96	52.7	11	1
High	Master Protein	extdb	30S ribosomal protein S2 [Escherichia coli]	FALSE	96.746	66	13	39	13	241	26.7	7.14	101.58	13	1
High	Master Protein	A0A140N4Y2	Peptidyl-prolyl cis-trans isomerase OS=Escherichia coli (strain B / BL21-DE3) OX=469008 GN=ECBD_0385 PE=3 SV=1	FALSE	96.332	62	8	27	1	190	20.4	9.14	85.54	8	1
High	Master Protein	A0A5F1UIK3	Glutamate decarboxylase (Fragment) OS=Escherichia coli OX=562 GN=E5S61_23115 PE=3 SV=1	FALSE	96.013	44	8	17	1	347	38.9	5.59	50.02	8	1
High	Master Protein	A0A7L5L019	Scaffolding protein MipA OS=Escherichia coli OX=562 GN=mipA PE=3 SV=1	FALSE	95.645	46	7	40	7	248	27.8	5.62	103.89	7	1
High	Master Protein	lcl	[locus_tag=EDL933_0504] [protein=putative lipoprotein YajG precursor] [protein_id=AIG66708.1] [location=complement(519642..520100)] [gbkey=CDS]	FALSE	95.029	78	7	23	7	152	16.6	8.4	57.55	7	1
High	Master Protein	A0A6S4W0I6	Outer membrane protein F OS=Escherichia coli OX=562 GN=ompF PE=3 SV=1	FALSE	94.875	48	14	34	1	362	39.3	5.01	80.35	14	1
High	Master Protein	A0A3A6TBE1	DNA-directed RNA polymerase subunit beta OS=Escherichia coli OX=562 GN=rpoB PE=3 SV=1	FALSE	94.062	21	20	28	20	1342	150.5	5.26	59.18	20	1
High	Master Protein	D6I122	Outer membrane protein tolC OS=Escherichia coli B088 OX=550672 GN=ECCG_02407 PE=3 SV=1	FALSE	93.378	44	13	19	13	490	53.3	5.39	54.7	13	1
High	Master Protein	A0A0F3TKP7	YmgD family protein OS=Escherichia coli OX=562 GN=ymgD PE=4 SV=1	FALSE	92.678	66	5	42	5	109	11.8	5.48	108.3	5	1
High	Master Protein	A0A6M0PEX4	PTS glucose transporter subunit IIA OS=Escherichia coli OX=562 GN=crr PE=4 SV=1	FALSE	92.516	64	9	38	9	169	18.2	4.84	80.96	9	1
High	Master Protein	A0A024L797	Thiol:disulfide interchange protein OS=Escherichia coli OX=562 GN=dsbA PE=3 SV=1	FALSE	92.19	52	9	55	1	208	23.1	6.79	115.45	9	1
High	Master Protein	A0A377LAN5	Peptidyl-prolyl cis-trans isomerase OS=Escherichia coli OX=562 GN=ppiA PE=3 SV=1	FALSE	92.01	59	8	29	1	186	20.1	8.85	80.23	8	1
High	Master Protein	A0A4D2R7Z2	Alpha-1,4 glucan phosphorylase OS=Escherichia coli OX=562 GN=glgP_1 PE=3 SV=1	FALSE	92.007	37	23	33	23	797	90.5	7.52	64.01	23	1
High	Master Protein	A0A5E9SJU2	DNA protection during starvation protein OS=Escherichia coli OX=562 GN=dps PE=3 SV=1	FALSE	91.937	72	12	40	2	167	18.7	6.11	98.45	12	1
High	Master Protein	A0A210GCF7	Phosphate-binding protein PstS OS=Escherichia coli OX=562 GN=pstS PE=3 SV=1	FALSE	91.362	60	17	25	17	346	37	8.47	59.66	17	1
High	Master Protein	Q5ECJ1	Flagellin (Fragment) OS=Escherichia coli OX=562 GN=fliC PE=3 SV=1	FALSE	91.333	22	8	88	1	445	46.4	4.84	242.62	8	1
High	Master Protein	A0A4Y8AKR0	Endolytic peptidoglycan transglycosylase RlpA OS=Escherichia coli OX=562 GN=rlpA PE=3 SV=1	FALSE	91.259	45	10	24	1	362	37.5	5.73	61.11	10	1
High	Master Protein	A0A0P7NC44	Bacterial OB fold family protein OS=Escherichia coli OX=562 GN=ACU90_20300 PE=4 SV=1	FALSE	91.176	61	10	33	10	114	12.4	5.14	66.57	10	1
High	Master Protein	A0A7U9AVC1	Peroxiredoxin OS=Escherichia coli TA206 OX=656440 GN=ECKG_00441 PE=4 SV=1	FALSE	91.107	60	12	29	12	187	20.8	5.17	58.49	12	1
High	Master Protein	A0A2W6PV85	Nucleoside-specific channel-forming protein Tsx OS=Escherichia coli OX=562 GN=DNQ45_27140 PE=3 SV=1	FALSE	91.092	40	7	25	5	294	33.6	5.21	76.75	7	1
High	Master Protein	A0A0K3M6Z5	LPS-assembly protein LptD OS=Escherichia coli OX=562 GN=imp PE=3 SV=1	FALSE	90.939	34	19	27	19	784	89.6	5.16	62.12	19	1
High	Master Protein	A0A193LMB8	Chaperone protein Skp OS=Escherichia coli OX=562 GN=GJ11_00930 PE=3 SV=1	FALSE	90.566	48	6	48	2	161	17.7	9.7	119.01	6	1
High	Master Protein	A0A6C8HPX9	Uncharacterized protein OS=Escherichia coli P0299917.1 OX=1116047 GN=ECP02999171_0686 PE=4 SV=1	FALSE	90.355	57	5	19	5	185	18.8	8.13	66.45	5	1
High	Master Protein	D7Y521	Polyribonucleotide nucleotidyltransferase OS=Escherichia coli (strain MS 115-1) OX=749537 GN=pnp PE=3 SV=1	FALSE	90.135	25	13	25	13	734	79.8	5.53	65.13	13	1
High	Master Protein	A0A0K9TEE9	DNA protection during starvation protein OS=Escherichia coli M114 OX=656416 GN=dps PE=3 SV=1	FALSE	89.713	72	12	43	2	167	18.7	6.11	92.49	12	1
High	Master Protein	A0A0A0HEI6	Acid stress chaperone HdeA OS=Escherichia coli OX=562 GN=hdeA PE=3 SV=1	FALSE	89.023	59	3	86	1	110	11.8	5.55	365.65	3	1
High	Master Protein	A0A0H0JS93	Penicillin-binding protein activator LpoA OS=Escherichia coli OX=562 GN=lpoA PE=3 SV=1	FALSE	88.775	32	18	32	18	662	71.2	5.62	57.84	18	1
High	Master Protein	A0A3A6SH78	ATP synthase gamma chain OS=Escherichia coli OX=562 GN=atpG PE=3 SV=1	FALSE	87.842	70	14	24	1	287	31.5	8.76	57.62	14	1
High	Master Protein	A0A1V3VXM4	Tol-Pal system protein TolB OS=Escherichia coli OX=562 GN=tolB PE=3 SV=1	FALSE	87.434	53	14	24	14	430	45.9	7.59	52.11	14	1
High	Master Protein	Q1RF64	Nucleoid-associated protein YbaB OS=Escherichia coli (strain UTI89 / UPEC) OX=364106 GN=ybaB PE=3 SV=1	FALSE	86.069	79	8	23	8	114	12.6	5.29	55.26	8	1
High	Master Protein	A0A1X3IGL3	Phosphopentomutase OS=Escherichia coli E1114 OX=550691 GN=deoB PE=3 SV=1	FALSE	85.75	53	16	28	16	407	44.4	5.29	59.54	16	1
High	Master Protein	A0A2I6FJR1	Lysine decarboxylase OS=Escherichia coli OX=562 GN=CR538_23330 PE=3 SV=1	FALSE	85.538	35	16	22	16	715	81.2	6.34	54.05	16	1
High	Master Protein	sp	ALBU_BOVIN	TRUE	85.475	19	14	36	11	607	69.2	6.18	87.44	14	1
High	Master Protein	A0A073GBE8	Glutathione-binding protein gsiB OS=Escherichia coli 2-427-07_S4_C3 OX=1444266 GN=gsiB PE=3 SV=1	FALSE	85.262	44	14	18	1	502	55.4	7.53	48.19	14	1
High	Master Protein	A0A777PSC9	Peptidyl-prolyl cis-trans isomerase (Fragment) OS=Escherichia coli OX=562 GN=GF208_03355 PE=3 SV=1	FALSE	84.964	63	8	26	1	186	20	8.37	78.4	8	1
High	Master Protein	E9TGW6	Phospholipid-binding domain protein OS=Escherichia coli MS 117-3 OX=749539 GN=HMPREF9542_03043 PE=4 SV=1	FALSE	84.559	65	10	26	10	191	20	8.98	72.38	10	1
High	Master Protein	A0A478LB55	Glutathione ABC transporter periplasmic binding protein OS=Escherichia coli OX=562 GN=gsiB PE=3 SV=1	FALSE	84.018	40	14	19	1	512	56.4	8.28	49.56	14	1
High	Master Protein	W8ZQR6	Penicillin-binding protein activator LpoB OS=Escherichia coli O25b:H4-ST131 OX=941322 GN=lpoB PE=3 SV=1	FALSE	83.944	40	6	22	6	214	22.7	6.93	48.56	6	1
High	Master Protein	A0A0K3JM78	Slp family outer membrane lipoprotein OS=Escherichia coli OX=562 GN=slp_1 PE=4 SV=1	FALSE	83.246	38	6	28	2	243	27.5	7.05	74.17	6	1
High	Master Protein	A0A026UH39	Sulfurtransferase OS=Escherichia coli O174:H8 str. 04-3038 OX=1446704 GN=BW70_28045 PE=4 SV=1	FALSE	82.803	30	10	25	4	435	48.3	6.54	61.65	10	1
High	Master Protein	A0A774HB40	30S ribosomal protein S7 OS=Escherichia coli OX=562 GN=rpsG PE=3 SV=1	FALSE	82.327	52	7	23	1	156	17.6	10.3	49.99	7	1
High	Master Protein	A0A0Q3B606	Superoxide dismutase [Cu-Zn] OS=Escherichia coli OX=562 GN=AM270_03715 PE=3 SV=1	FALSE	81.894	79	9	42	1	173	17.7	6.64	74.43	9	1
High	Master Protein	A0A140NGG7	30S ribosomal protein S6 OS=Escherichia coli (strain B / BL21-DE3) OX=469008 GN=rpsF PE=3 SV=1	FALSE	81.595	63	6	28	6	131	15.2	5.39	63.54	6	1
High	Master Protein	A0A2S8JSC9	Superoxide dismutase OS=Escherichia coli OX=562 GN=sodB PE=3 SV=1	FALSE	81.416	59	8	22	8	193	21.3	5.95	58.93	8	1
High	Master Protein	A0A426EN18	Malonyl CoA-acyl carrier protein transacylase OS=Escherichia coli OX=562 GN=fabD PE=3 SV=1	FALSE	79.65	47	9	16	9	309	32.4	5.03	50.14	9	1
High	Master Protein	E1J1N8	30S ribosomal protein S7 OS=Escherichia coli MS 124-1 OX=679205 GN=rpsG PE=3 SV=1	FALSE	79.133	54	7	23	1	156	17.6	10.3	46.66	7	1
High	Master Protein	A0A3E1WBR1	Beta-glucosidase BglX OS=Escherichia coli OX=562 GN=bglX PE=3 SV=1	FALSE	78.774	32	18	24	18	765	83.5	5.99	48.52	18	1
High	Master Protein	A0A3Z1IQT5	Acid stress chaperone HdeA OS=Escherichia coli OX=562 GN=hdeA PE=3 SV=1	FALSE	78.48	59	3	84	1	110	11.9	5.25	359.71	3	1
High	Master Protein	V5UZV4	L8 (Fragment) OS=Escherichia coli OX=562 PE=3 SV=1	FALSE	78.194	58	8	92	1	120	12.2	4.65	270.87	8	1
High	Master Protein	extdb	maltoporin LamB [Escherichia coli]	FALSE	78.145	32	10	21	3	446	50	5.08	59.27	10	1
High	Master Protein	A0A1Q9L2K1	Deoxyribose-phosphate aldolase OS=Escherichia coli OX=562 GN=deoC PE=3 SV=1	FALSE	77.615	60	12	16	12	259	27.8	5.73	45.92	12	1
High	Master Protein	A0A2A6QA66	Chaperone SurA OS=Escherichia coli OX=562 GN=surA PE=3 SV=1	FALSE	77.61	47	14	24	14	428	47.3	6.98	60.16	14	1
High	Master Protein	A0A0Q3CU51	Uncharacterized protein OS=Escherichia coli OX=562 GN=AM270_27265 PE=4 SV=1	FALSE	76.625	69	5	18	5	134	14.7	7.65	53.91	5	1
High	Master Protein	A0A369FUE0	Outer membrane lipoprotein SlyB OS=Escherichia coli OX=562 GN=slyB PE=4 SV=1	FALSE	76.504	70	5	61	2	155	15.6	9.31	150.22	5	1
High	Master Protein	Q9EU50	FimA_6 protein OS=Escherichia coli OX=562 GN=fimA PE=4 SV=1	FALSE	76.137	64	6	10	6	182	18.3	5.41	44.04	6	1
High	Master Protein	A0A5F1DVS0	OB fold stress tolerance protein YgiW OS=Escherichia coli OX=562 GN=ygiW PE=4 SV=1	FALSE	75.388	49	9	98	1	130	14.1	5.26	206.07	9	1
High	Master Protein	A0A0K4VM68	50S ribosomal protein L24 OS=Escherichia coli OX=562 GN=rplX PE=3 SV=1	FALSE	74.986	56	6	34	6	104	11.3	10.21	79.67	6	1
High	Master Protein	A0A080IBY9	Maltoporin OS=Escherichia coli 1-250-04_S3_C2 OX=1444163 GN=lamB PE=2 SV=1	FALSE	74.717	29	8	17	1	446	49.9	4.98	55.63	8	1
High	Master Protein	A0A193LUQ4	Histidine ABC transporter substrate-binding protein HisJ OS=Escherichia coli OX=562 GN=GJ11_15480 PE=3 SV=1	FALSE	74.351	52	9	15	6	260	28.5	5.44	42.17	9	1
High	Master Protein	A0A771GZ87	Elongation factor Tu (Fragment) OS=Escherichia coli OX=562 GN=HH129_24200 PE=4 SV=1	FALSE	74.026	77	8	16	2	142	15.8	4.44	46.36	8	1
High	Master Protein	B7NCH9	D-galactose-binding periplasmic protein OS=Escherichia coli O17:K52:H18 (strain UMN026 / ExPEC) OX=585056 GN=mglB PE=3 SV=1	FALSE	72.533	70	19	26	19	332	35.7	6.02	52.79	19	1
High	Master Protein	A0A069XNY9	SmpA / OmlA family protein OS=Escherichia coli 3-373-03_S4_C2 OX=1444252 GN=AD17_2076 PE=4 SV=1	FALSE	72.409	69	5	38	1	108	11.5	7.24	87.25	5	1
High	Master Protein	lcl	[locus_tag=EDL933_3744] [db_xref=GO:0008861] [protein=Pyruvate formate-lyase] [protein_id=AIG69904.1] [location=complement(3523154..3523537)] [gbkey=CDS]	FALSE	72.216	55	6	23	6	127	14.3	5.17	51.98	6	1
High	Master Protein	A0A4C4F1C0	2',3'-cyclic-nucleotide 2'-phosphodiesterase/3'-nucleotidase OS=Escherichia coli OX=562 GN=cpdB PE=3 SV=1	FALSE	71.98	30	15	23	15	647	70.8	5.82	49.26	15	1
High	Master Protein	K4X7Z7	Dipeptide transport protein OS=Escherichia coli O111:H8 str. CVM9634 OX=1165944 GN=ECO9634_29047 PE=3 SV=1	FALSE	70.977	29	13	21	13	535	60.3	6.65	42.31	13	1
High	Master Protein	A0A6H3LAN8	Glucose-1-phosphatase OS=Escherichia coli OX=562 GN=DEO20_09690 PE=4 SV=1	FALSE	70.665	33	10	17	0	413	45.6	5.9	46.02	10	1
High	Master Protein	F4T849	Putative endoribonuclease L-PSP OS=Escherichia coli M605 OX=656417 GN=ECIG_03185 PE=3 SV=1	FALSE	70.556	74	7	21	5	141	15.2	6.11	53.26	7	1
High	Master Protein	D8A7C8	TIGR00156 family protein OS=Escherichia coli (strain MS 21-1) OX=749527 GN=HMPREF9530_02430 PE=4 SV=1	FALSE	70.155	49	8	102	2	130	14	5.26	210.93	8	1
High	Master Protein	A0A074I9L3	Transaldolase OS=Escherichia coli 1-392-07_S4_C1 OX=1444219 GN=tal PE=3 SV=1	FALSE	69.963	39	9	17	9	317	35.2	5.21	44.07	9	1
High	Master Protein	A0A4C3FYN3	Beta-barrel assembly-enhancing protease OS=Escherichia coli OX=562 GN=bepA PE=3 SV=1	FALSE	69.74	30	8	12	8	487	53.9	7.68	34.38	8	1
High	Master Protein	A0A069XVI9	2,3,4,5-tetrahydropyridine-2,6-dicarboxylate N-succinyltransferase OS=Escherichia coli 3-373-03_S4_C2 OX=1444252 GN=dapD PE=3 SV=1	FALSE	69.664	36	9	18	9	274	29.8	5.74	44.79	9	1
High	Master Protein	M9GVE7	Inner membrane lipoprotein yiaD OS=Escherichia coli MP021561.2 OX=1116136 GN=yiaD PE=4 SV=1	FALSE	69.302	36	5	13	5	219	22.1	9.7	46.71	5	1
High	Master Protein	A0A3S7CL53	Histidine ABC transporter substrate-binding protein HisJ OS=Escherichia coli OX=562 GN=BWI89_01590 PE=3 SV=1	FALSE	68.813	43	9	18	9	260	27.9	5.59	43.4	9	1
High	Master Protein	A0A7U9FY43	Phospholipase A(1) OS=Escherichia coli TA143 OX=656437 GN=ECMG_04604 PE=4 SV=1	FALSE	67.959	45	9	17	9	289	33.1	5.33	46.53	9	1
High	Master Protein	A0A6C8HIJ1	Putative L,D-transpeptidase YnhG OS=Escherichia coli P0299917.1 OX=1116047 GN=ECP02999171_2279 PE=3 SV=1	FALSE	67.822	39	7	24	1	334	36.1	9.41	52.6	7	1
High	Master Protein	B7MGE9	Glutamine--fructose-6-phosphate aminotransferase [isomerizing] OS=Escherichia coli O45:K1 (strain S88 / ExPEC) OX=585035 GN=glmS PE=3 SV=1	FALSE	67.636	30	11	12	11	609	66.8	5.87	31.3	11	1
High	Master Protein	A0A4D0G9J3	Ferrichrome outer membrane transporter OS=Escherichia coli OX=562 GN=fhuA PE=3 SV=1	FALSE	67.625	28	14	18	14	747	82.1	5.69	39.88	14	1
High	Master Protein	A0A0K4C9P9	Bifunctional glucose-1-phosphatase/inositol phosphatase OS=Escherichia coli OX=562 GN=agp PE=4 SV=1	FALSE	67.619	31	10	17	1	413	45.6	6.07	45.82	10	1
High	Master Protein	U9ZK11	Thioredoxin OS=Escherichia coli 907713 OX=1268986 GN=HMPREF1599_03322 PE=3 SV=1	FALSE	67.107	47	5	19	5	127	14	5.24	46.45	5	1
High	Master Protein	A0A5C9AJJ8	Methionine adenosyltransferase (Fragment) OS=Escherichia coli OX=562 GN=metK PE=3 SV=1	FALSE	66.767	51	11	15	11	372	40.7	5.12	37.48	11	1
High	Master Protein	A0A5C9AIQ4	OB fold stress tolerance protein YgiW (Fragment) OS=Escherichia coli OX=562 GN=ygiW PE=4 SV=1	FALSE	66.696	88	7	87	1	59	6.7	4.88	190.34	7	1
High	Master Protein	A0A2S8JXG8	Phage shock protein E (Rhodanase-like protein) OS=Escherichia coli OX=562 GN=pspE PE=4 SV=1	FALSE	65.917	43	3	29	3	104	11.5	7.43	80.69	3	1
High	Master Protein	A0A7X1JUL8	Alanine--tRNA ligase OS=Escherichia coli OX=562 GN=DL637_18645 PE=4 SV=1	FALSE	65.899	20	13	17	13	876	95.9	5.81	38.45	13	1
High	Master Protein	A0A246P0W3	Citrate lyase alpha chain OS=Escherichia coli OX=562 GN=citF PE=4 SV=1	FALSE	65.649	31	11	16	11	510	55.2	6.54	36.4	11	1
High	Master Protein	A0A479DV77	Transcriptional regulator OS=Escherichia coli OX=562 GN=ytfJ_2 PE=4 SV=1	FALSE	65.396	44	7	16	7	185	20.6	9.16	43.82	7	1
High	Master Protein	A0A6N4PDQ9	Superoxide dismutase [Cu-Zn] OS=Escherichia coli OX=562 GN=sodC PE=3 SV=1	FALSE	65.205	79	9	40	1	173	17.7	6.42	67.82	9	1
High	Master Protein	V0SBN7	Arginine ABC transporter, periplasmic arginine-binding protein ArtJ OS=Escherichia coli 907672 OX=1268982 GN=HMPREF1595_03485 PE=3 SV=1	FALSE	65.044	55	10	22	10	260	28.7	8.44	47.1	10	1
High	Master Protein	A0A3W3FJZ4	50S ribosomal protein L10 OS=Escherichia coli OX=562 GN=rplJ PE=1 SV=1	FALSE	64.536	56	7	27	7	165	17.7	8.98	62.47	7	1
High	Master Protein	A0A3Z0R8U7	Bifunctional glucose-1-phosphatase/inositol phosphatase OS=Escherichia coli OX=562 GN=EG808_14205 PE=4 SV=1	FALSE	64.521	33	10	17	1	413	45.7	5.6	41.26	10	1
High	Master Protein	lcl	[locus_tag=EDL933_4522] [db_xref=GO:0003735,GO:0005622,GO:0005840,GO:0006412] [protein=LSU ribosomal protein L6p (L9e)] [protein_id=AIG70670.1] [location=complement(4268246..4268779)] [gbkey=CDS]	FALSE	64.339	75	10	21	10	177	18.9	9.7	47.93	10	1
High	Master Protein	A7ZKU9	Bacterial pre-peptidase C-terminal domain OS=Escherichia coli O139:H28 (strain E24377A / ETEC) OX=331111 GN=EcE24377A_1322 PE=4 SV=1	FALSE	63.853	64	6	28	6	133	14.8	9.29	69.83	6	1
High	Master Protein	A0A444R1M7	L-asparaginase 2 (Fragment) OS=Escherichia coli OX=562 GN=ansB PE=4 SV=1	FALSE	63.533	42	6	21	1	152	16.3	8.81	51.37	6	1
High	Master Protein	A0A1U9T1I6	Phosphoserine aminotransferase OS=Escherichia coli OX=562 GN=serC PE=3 SV=1	FALSE	63.529	40	11	17	11	362	39.8	5.74	40.23	11	1
High	Master Protein	A0A6G4BPS2	Ribosome-associated translation inhibitor RaiA OS=Escherichia coli OX=562 GN=raiA PE=4 SV=1	FALSE	63.317	60	5	26	5	113	12.8	7.06	56.3	5	1
High	Master Protein	A0A2A6Q306	Outer membrane protein assembly factor BamD OS=Escherichia coli OX=562 GN=bamD PE=3 SV=1	FALSE	62.65	51	10	23	10	245	27.9	6.09	43.84	10	1
High	Master Protein	A0A5C9AFJ7	Molecular chaperone OsmY (Fragment) OS=Escherichia coli OX=562 GN=osmY PE=4 SV=1	FALSE	62.642	68	6	67	1	111	11.6	5.97	186.5	6	1
High	Master Protein	A0A4S1UEN8	Outer membrane protein X OS=Escherichia coli OX=562 GN=ompX PE=3 SV=1	FALSE	62.541	50	8	15	8	171	18.6	8.03	43.25	8	1
High	Master Protein	A0A6M7GU22	50S ribosomal protein L3 OS=Escherichia coli O157:H7 OX=83334 GN=rplC PE=3 SV=1	FALSE	62.074	50	9	24	9	209	22.2	9.91	45.48	9	1
High	Master Protein	A0A074I458	Anaerobic dimethyl sulfoxide reductase, A subunit, DmsA/YnfE family protein OS=Escherichia coli 1-392-07_S4_C1 OX=1444219 GN=AC84_1794 PE=3 SV=1	FALSE	61.749	22	11	17	10	807	90	7.21	29.9	11	1
High	Master Protein	A0A5P0ZBF6	NAD(P)H dehydrogenase (quinone) OS=Escherichia coli OX=562 GN=wrbA PE=3 SV=1	FALSE	61.506	53	9	31	9	198	20.9	5.86	73.06	9	1
High	Master Protein	extdb	translation initiation factor IF-3 [Escherichia coli]	FALSE	61.163	42	5	13	5	180	20.6	9.52	36.05	5	1
High	Master Protein	A0A222QQQ0	Glyoxalase OS=Escherichia coli NCCP15648 OX=1200752 GN=A610_3891 PE=3 SV=1	FALSE	61.1	47	6	13	6	217	23	4.77	38.21	6	1
High	Master Protein	A0A1X3KA42	DNA-directed RNA polymerase subunit omega OS=Escherichia coli H605 OX=656410 GN=rpoZ PE=3 SV=1	FALSE	61.052	80	7	13	7	91	10.2	4.92	41.21	7	1
High	Master Protein	A0A0E0Y6Y8	Aminoacyl-histidine dipeptidase OS=Escherichia coli O104:H4 (strain 2011C-3493) OX=1133852 GN=O3K_20280 PE=4 SV=1	FALSE	60.575	35	13	16	13	485	52.9	5.39	38.57	13	1
High	Master Protein	A0A7Z2UIH1	Outer membrane lipoprotein chaperone LolA OS=Escherichia coli OX=562 GN=lolA PE=4 SV=1	FALSE	60.228	48	8	22	1	203	22.5	6.8	54.42	8	1
High	Master Protein	A0A5C9AKK2	DUF4156 domain-containing protein (Fragment) OS=Escherichia coli OX=562 GN=FWK02_20575 PE=4 SV=1	FALSE	60.001	80	3	14	3	93	9.5	5.17	49.35	3	1
High	Master Protein	A0A069Y009	6-phosphogluconate dehydrogenase, decarboxylating OS=Escherichia coli 3-373-03_S4_C2 OX=1444252 GN=gnd PE=3 SV=1	FALSE	59.919	38	12	14	12	468	51.4	5.15	37.24	12	1
High	Master Protein	A0A3W5XZT5	Dimethylsulfoxide reductase subunit A OS=Escherichia coli OX=562 GN=EAN77_13950 PE=3 SV=1	FALSE	59.873	19	11	14	10	814	90.4	6.93	37.71	11	1
High	Master Protein	A0A073HGL3	50S ribosomal protein L22 OS=Escherichia coli 5-366-08_S1_C3 OX=1444102 GN=rplV PE=3 SV=1	FALSE	59.273	53	7	27	2	110	12.2	10.23	66.23	7	1
High	Master Protein	A0A4Q0C6A8	DUF1471 domain-containing protein OS=Escherichia coli OX=562 GN=EQ820_00475 PE=4 SV=1	FALSE	58.606	52	4	61	2	91	9.9	6.07	143.04	4	1
High	Master Protein	A0A0K9TJ89	Autotransporter beta-domain-containing protein OS=Escherichia coli M114 OX=656416 GN=ERYG_00146 PE=4 SV=1	FALSE	58.278	15	7	15	1	703	72.8	5.9	38.03	7	1
High	Master Protein	A0A6N0IIL6	Isoleucine--tRNA ligase OS=Escherichia coli OX=562 GN=ileS PE=3 SV=1	FALSE	58.215	22	15	16	15	938	104.2	6.01	35.69	15	1
High	Master Protein	F4V180	Outer-membrane lipoprotein LolB OS=Escherichia coli TA280 OX=656444 GN=lolB PE=3 SV=1	FALSE	58.166	67	11	24	11	207	23.6	9.04	41.81	11	1
High	Master Protein	F4TIW2	Chaperone protein ClpB OS=Escherichia coli M718 OX=656419 GN=clpB PE=3 SV=1	FALSE	57.86	16	11	16	11	861	95.9	5.48	40.69	11	1
High	Master Protein	A0A4Q8F9G3	3-oxoacyl-[acyl-carrier-protein] reductase OS=Escherichia coli OX=562 GN=fabG PE=3 SV=1	FALSE	57.735	46	7	13	7	244	25.5	7.42	44.95	7	1
High	Master Protein	A0A3S4NPI3	50S ribosomal protein L16 OS=Escherichia coli OX=562 GN=rplP PE=3 SV=1	FALSE	57.705	35	3	14	3	125	13.9	10.86	38.99	3	1
High	Master Protein	B7UGV9	Ancillary SecYEG translocon subunit OS=Escherichia coli O127:H6 (strain E2348/69 / EPEC) OX=574521 GN=yfgM PE=3 SV=1	FALSE	57.149	49	7	13	1	206	22.2	5.16	34.8	7	1
High	Master Protein	A0A0K4G3F2	Peptidyl-prolyl cis-trans isomerase OS=Escherichia coli OX=562 GN=slyD PE=3 SV=1	FALSE	56.913	47	5	10	5	194	20.6	5.03	33.48	5	1
High	Master Protein	A0A369FG97	Outer membrane protein assembly factor BamB OS=Escherichia coli OX=562 GN=bamB PE=3 SV=1	FALSE	56.768	35	10	14	10	392	41.8	4.91	30.35	10	1
High	Master Protein	F4UXZ0	Fumarate reductase iron-sulfur subunit OS=Escherichia coli TA280 OX=656444 GN=ECNG_01233 PE=3 SV=1	FALSE	55.572	46	7	19	7	263	29.6	8.6	35.59	7	1
High	Master Protein	A0A7U9AVW0	Outer membrane lipoprotein carrier protein LolA OS=Escherichia coli TA206 OX=656440 GN=ECKG_00771 PE=4 SV=1	FALSE	55.513	62	8	20	1	159	17.8	5.27	48.82	8	1
High	Master Protein	A0A376HZF3	Phosphocarrier protein Hpr OS=Escherichia coli OX=562 GN=ptsH PE=4 SV=1	FALSE	55.414	79	4	17	4	85	9.1	5.83	39.62	4	1
High	Master Protein	A0A7U9BLX4	DNA-binding protein StpA OS=Escherichia coli H299 OX=656393 GN=ECOG_00755 PE=4 SV=1	FALSE	55.27	49	5	14	5	134	15.3	9	41.6	5	1
High	Master Protein	extdb	30S ribosomal protein S4 [Escherichia coli]	FALSE	54.69	51	9	13	1	206	23.5	10.05	30.69	9	1
High	Master Protein	A0A5F1E7A3	Uncharacterized protein OS=Escherichia coli OX=562 GN=CQB02_01600 PE=4 SV=1	FALSE	54.666	39	5	19	1	189	21	7.42	48.09	5	1
High	Master Protein	E6BNG5	Triosephosphate isomerase OS=Escherichia coli MS 85-1 OX=679202 GN=tpiA PE=3 SV=1	FALSE	54.297	55	9	17	9	249	26.2	5.6	34.34	9	1
High	Master Protein	A0A2S5U6J9	Xaa-Pro dipeptidase OS=Escherichia coli OX=562 GN=pepQ PE=3 SV=1	FALSE	54.238	26	9	16	9	443	50.1	5.99	38.85	9	1
High	Master Protein	A0A4Q8JMM4	Formate dehydrogenase subunit alpha OS=Escherichia coli OX=562 GN=EXX06_24415 PE=3 SV=1	FALSE	53.699	27	12	16	12	715	79.4	6.32	33.73	12	1
High	Master Protein	A0A1Q4PCL1	Outer membrane lipoprotein RcsF OS=Escherichia coli OX=562 GN=rcsF PE=3 SV=1	FALSE	53.606	65	5	14	5	134	14.2	9.13	35.15	5	1
High	Master Protein	A0A4V2BMS5	Uncharacterized protein OS=Escherichia coli OX=562 GN=EVY14_22790 PE=4 SV=1	FALSE	53.252	59	4	15	4	91	10.4	4.7	43.25	4	1
High	Master Protein	A0A0H2V743	Heat shock protein hslJ OS=Escherichia coli O6:H1 (strain CFT073 / ATCC 700928 / UPEC) OX=199310 GN=hslJ PE=4 SV=1	FALSE	52.891	65	7	19	2	144	15.6	7.87	35.84	7	1
High	Master Protein	A0A4C4ZJ07	50S ribosomal protein L5 OS=Escherichia coli OX=562 GN=rplE PE=3 SV=1	FALSE	52.576	44	8	21	8	179	20.3	9.48	42.67	8	1
High	Master Protein	A0A3U5UQ40	Universal stress protein OS=Escherichia coli OX=562 GN=uspD PE=3 SV=1	FALSE	52.512	31	3	22	3	142	16.3	6.87	48.93	3	1
High	Master Protein	C3SJ47	CDP-diacylglycerol phosphotidylhydrolase OS=Escherichia coli OX=562 GN=sbp PE=3 SV=1	FALSE	52.417	35	9	13	9	329	36.7	7.15	28.44	9	1
High	Master Protein	A0A0D0LKP2	Aminotransferase OS=Escherichia coli OX=562 GN=aspC_1 PE=3 SV=1	FALSE	52.39	37	13	20	13	396	43.6	5.77	38	13	1
High	Master Protein	A0A246NXK5	Uncharacterized protein OS=Escherichia coli OX=562 GN=B7C53_09375 PE=4 SV=1	FALSE	52.216	22	11	14	11	698	78.6	6.18	30.83	11	1
High	Master Protein	D3QN42	Serine hydroxymethyltransferase OS=Escherichia coli O55:H7 (strain CB9615 / EPEC) OX=701177 GN=glyA PE=3 SV=1	FALSE	52.167	34	10	15	10	417	45.3	6.6	38.17	10	1
High	Master Protein	A0A4C9WKT1	Glucose-6-phosphate isomerase OS=Escherichia coli OX=562 GN=pgi PE=3 SV=1	FALSE	52.142	20	10	12	10	549	61.5	6.28	32.65	10	1
High	Master Protein	A0A3S6ZF22	Lipoprotein OS=Escherichia coli OX=562 GN=CDC27_09860 PE=4 SV=1	FALSE	51.497	64	8	20	8	137	15	4.98	41.36	8	1
High	Master Protein	A0A1X3KA41	50S ribosomal protein L31 OS=Escherichia coli H605 OX=656410 GN=rpmE PE=3 SV=1	FALSE	51.197	53	3	40	1	70	7.8	9.32	80.66	3	1
High	Master Protein	A0A6M0PJC8	30S ribosomal protein S9 OS=Escherichia coli OX=562 GN=rpsI PE=3 SV=1	FALSE	50.96	53	7	21	7	130	14.8	10.95	47.23	7	1
High	Master Protein	A0A026UII8	Lipoprotein OS=Escherichia coli O174:H8 str. 04-3038 OX=1446704 GN=BW70_24260 PE=4 SV=1	FALSE	50.913	57	7	18	7	171	19	7.31	40.6	7	1
High	Master Protein	A0A2I6F8U9	50S ribosomal protein L2 OS=Escherichia coli OX=562 GN=rplB PE=3 SV=1	FALSE	50.844	47	10	17	10	273	29.7	10.84	38.27	10	1
High	Master Protein	A0A073UA06	Transketolase (Fragment) OS=Escherichia coli 5-366-08_S1_C1 OX=1444047 GN=AB08_4913 PE=3 SV=1	FALSE	50.824	32	12	13	11	552	60.3	6.11	34.78	12	1
High	Master Protein	A0A6M0PFM1	Arginine ABC transporter substrate-binding protein OS=Escherichia coli OX=562 GN=artJ PE=3 SV=1	FALSE	50.772	27	7	26	2	243	26.7	8.29	44.47	7	1
High	Master Protein	A0A0A1A2T9	Glucans biosynthesis protein G OS=Escherichia coli OX=562 GN=mdoG PE=3 SV=1	FALSE	50.516	23	9	13	9	517	58.6	8.06	30.84	9	1
High	Master Protein	A0A6L6S7E6	Ancillary SecYEG translocon subunit OS=Escherichia coli OX=562 GN=GNZ05_14280 PE=3 SV=1	FALSE	50.506	41	7	13	1	206	22.2	5.47	32.95	7	1
High	Master Protein	C3TJS3	Citrate (pro-3S)-lyase subunit beta OS=Escherichia coli OX=562 GN=ECs0655 PE=3 SV=1	FALSE	50.32	41	8	13	8	307	33.6	5.74	31.45	8	1
High	Master Protein	lcl	[locus_tag=EDL933_4515] [db_xref=GO:0003723,GO:0003735,GO:0005622,GO:0005840,GO:0006412] [protein=SSU ribosomal protein S13p (S18e)] [protein_id=AIG70663.1] [location=complement(4264754..4265110)] [gbkey=CDS]	FALSE	50.226	59	7	19	3	118	13.1	10.78	44.29	7	1
High	Master Protein	A0A210G7C8	DNA-binding protein HU-alpha OS=Escherichia coli OX=562 GN=hupA PE=3 SV=1	FALSE	50.133	58	4	24	4	90	9.5	9.58	45.81	4	1
High	Master Protein	A0A5C9AN60	50S ribosomal protein L7/L12 (Fragment) OS=Escherichia coli OX=562 GN=FWK02_11190 PE=4 SV=1	FALSE	50.026	73	8	44	1	83	8.4	4.88	102.13	8	1
High	Master Protein	A0A5F1E974	Acid stress chaperone HdeA OS=Escherichia coli OX=562 GN=hdeA PE=3 SV=1	FALSE	49.79	55	2	60	1	110	11.8	5.25	190.49	2	1
High	Master Protein	lcl	[locus_tag=EDL933_5547] [db_xref=GO:0003735,GO:0005622,GO:0005840,GO:0006412] [protein=LSU ribosomal protein L9p] [protein_id=AIG71686.1] [location=5328700..5329149] [gbkey=CDS]	FALSE	49.591	63	8	18	8	149	15.8	6.58	45.27	8	1
High	Master Protein	A0A0E1L8U0	Phosphoglucomutase OS=Escherichia coli OX=562 GN=pgm PE=3 SV=1	FALSE	49.354	26	12	13	12	546	58.4	5.71	24.64	12	1
High	Master Protein	A0A4Y9WRS7	Adenylosuccinate synthetase OS=Escherichia coli OX=562 GN=purA PE=3 SV=1	FALSE	48.964	32	10	14	10	432	47.4	5.49	31.98	10	1
High	Master Protein	A0A478GYP6	Co-chaperone YbbN OS=Escherichia coli OX=562 GN=ybbN PE=4 SV=1	FALSE	48.241	45	7	8	7	284	31.8	4.59	30.69	7	1
High	Master Protein	A0A2I6LPF2	50S ribosomal protein L7/L12 OS=Escherichia coli OX=562 GN=rplL PE=3 SV=1	FALSE	48.202	57	8	44	1	122	12.4	4.65	102.19	8	1
High	Master Protein	A0A0K9T6Z5	META domain-containing protein OS=Escherichia coli M114 OX=656416 GN=ERYG_05286 PE=4 SV=1	FALSE	47.964	56	6	18	1	140	15.1	8.28	38.72	6	1
High	Master Protein	lcl	[locus_tag=EDL933_3767] [db_xref=GO:0003735,GO:0005622,GO:0005840,GO:0006412] [protein=LSU ribosomal protein L19p] [protein_id=AIG69927.1] [location=complement(3551192..3551539)] [gbkey=CDS]	FALSE	47.701	66	7	18	7	115	13.1	10.62	36.71	7	1
High	Master Protein	E9Z084	Catalase-peroxidase OS=Escherichia coli M863 OX=656420 GN=katG PE=3 SV=1	FALSE	47.286	18	9	14	9	736	81.8	6.4	31.14	9	1
High	Master Protein	A0A2X5FFN5	Omptin family outer membrane protease OmpT OS=Escherichia coli OX=562 GN=ompT PE=3 SV=1	FALSE	47.072	56	13	18	13	317	35.6	5.78	32.65	13	1
High	Master Protein	A0A070FBN0	Phosphoenolpyruvate carboxykinase (ATP) OS=Escherichia coli O128:H2 str. 2011C-3317 OX=1446581 GN=pckA PE=3 SV=1	FALSE	47.044	24	9	11	9	540	59.6	5.71	28.05	9	1
High	Master Protein	A0A4C3P3Q4	High-affinity zinc uptake system protein ZnuA OS=Escherichia coli OX=562 GN=znuA PE=3 SV=1	FALSE	46.947	26	6	14	6	328	35.9	6.23	26.53	6	1
High	Master Protein	lcl	[locus_tag=EDL933_5490] [db_xref=GO:0005524,GO:0006457] [protein=Heat shock protein 60 family co-chaperone GroES] [protein_id=AIG71629.1] [location=5274005..5274298] [gbkey=CDS]	FALSE	46.832	62	5	21	1	97	10.4	5.24	33.47	5	1
High	Master Protein	A0A4Q0B443	Anti-sigma-E factor RseA OS=Escherichia coli OX=562 GN=rseA PE=3 SV=1	FALSE	46.702	52	6	14	2	216	24.3	5.2	33.45	6	1
High	Master Protein	J7QRU0	Protein chain elongation factor EF-Tu OS=Escherichia coli chi7122 OX=475609 GN=tufA PE=4 SV=1	FALSE	46.524	38	7	19	2	206	22.6	5.73	32.88	7	1
High	Master Protein	A0A4Q7GTJ6	30S ribosomal protein S8 (Fragment) OS=Escherichia coli OX=562 GN=EXM29_10285 PE=3 SV=1	FALSE	46.262	63	7	22	7	120	13.1	9.74	49.89	7	1
High	Master Protein	D7XIR8	Uncharacterized protein OS=Escherichia coli MS 84-1 OX=749533 GN=HMPREF9536_00900 PE=4 SV=1	FALSE	46.192	46	7	19	7	218	23.8	5.55	28.2	7	1
High	Master Protein	Q8X881	Uncharacterized protein OS=Escherichia coli O157:H7 OX=83334 GN=Z0955 PE=4 SV=2	FALSE	46.163	27	8	19	8	319	34.9	6.35	40.51	8	1
High	Master Protein	C3T047	Uracil phosphoribosyltransferase OS=Escherichia coli OX=562 GN=upp PE=3 SV=1	FALSE	46.134	57	7	10	7	217	23.5	6.23	24.52	7	1
High	Master Protein	A0A5E8HN61	S-ribosylhomocysteine lyase OS=Escherichia coli OX=562 GN=luxS PE=3 SV=1	FALSE	45.83	67	7	15	7	171	19.4	5.11	35.62	7	1
High	Master Protein	D6JBF7	Uncharacterized protein OS=Escherichia coli B354 OX=550677 GN=ECEG_01227 PE=4 SV=1	FALSE	45.798	40	2	11	2	93	10.3	7.59	29.49	2	1
High	Master Protein	A0A4D3MII4	Inosine-5'-monophosphate dehydrogenase OS=Escherichia coli OX=562 GN=guaB PE=3 SV=1	FALSE	45.731	32	11	14	11	488	52	6.35	30.31	11	1
High	Master Protein	A0A3U2IVP4	Periplasmic serine endoprotease DegP-like OS=Escherichia coli OX=562 GN=degQ PE=3 SV=1	FALSE	45.621	27	9	12	3	455	47.2	5.95	28.37	9	1
High	Master Protein	A0A376TRU2	50S ribosomal protein L22 OS=Escherichia coli OX=562 GN=rplV PE=3 SV=1	FALSE	45.567	52	6	25	1	110	12.2	10.32	58.62	6	1
High	Master Protein	extdb	replication initiation negative regulator SeqA [Escherichia coli]	FALSE	45.201	46	6	10	6	181	20.4	9.1	23.11	6	1
High	Master Protein	A0A1X3KJV4	50S ribosomal protein L25 OS=Escherichia coli H605 OX=656410 GN=rplY PE=3 SV=1	FALSE	45.127	56	5	17	5	94	10.7	9.6	34.2	5	1
High	Master Protein	A0A6M7GX12	Universal stress protein OS=Escherichia coli O157:H7 OX=83334 GN=uspA PE=3 SV=1	FALSE	44.811	62	4	11	4	144	16	5.29	27.48	4	1
High	Master Protein	A0A5E9RPI0	Probable cytosol aminopeptidase OS=Escherichia coli OX=562 GN=pepA PE=3 SV=1	FALSE	44.613	29	10	13	8	503	54.8	7.23	22.28	10	1
High	Master Protein	A0A6G4BWA7	Periplasmic nitrate reductase OS=Escherichia coli OX=562 GN=napA PE=3 SV=1	FALSE	44.406	16	10	13	10	828	93	8.03	31.64	10	1
High	Master Protein	A0A5F1DPR6	Thiamine-binding periplasmic protein OS=Escherichia coli OX=562 GN=thiB PE=3 SV=1	FALSE	44.349	33	8	12	8	327	36.2	6.6	27.2	8	1
High	Master Protein	A0A2W6P8I1	Amino acid ABC transporter substrate-binding protein (Fragment) OS=Escherichia coli OX=562 GN=DNQ45_20955 PE=4 SV=1	FALSE	44.156	53	4	6	1	119	13.2	4.91	25.37	4	1
High	Master Protein	A0A0K4GHQ6	Acid stress chaperone HdeA OS=Escherichia coli OX=562 GN=hdeA PE=3 SV=1	FALSE	44.017	54	2	28	2	111	11.9	5.58	64.94	2	1
High	Master Protein	A0A234Y2B9	Putrescine-binding periplasmic protein OS=Escherichia coli OX=562 GN=DMZ30_13015 PE=3 SV=1	FALSE	43.992	36	9	13	2	370	40.8	6.2	37.74	9	1
High	Master Protein	F4VIF1	Putative metalloprotease YggG OS=Escherichia coli H591 OX=656408 GN=ECPG_04225 PE=3 SV=1	FALSE	43.955	33	7	15	7	294	31.8	7.31	27.52	7	1
High	Master Protein	A0A2T1LEM2	50S ribosomal protein L14 OS=Escherichia coli OX=562 GN=rplN PE=3 SV=1	FALSE	43.771	37	3	15	3	123	13.6	10.42	33.98	3	1
High	Master Protein	A0A6C9BYI4	Multidrug transporter subunit MdtE OS=Escherichia coli OX=562 GN=mdtE PE=3 SV=1	FALSE	43.697	32	10	13	10	385	41.2	5.91	31.49	10	1
High	Master Protein	A0A1X3J998	Soluble cytochrome b562 OS=Escherichia coli H386 OX=656397 GN=ECVG_03879 PE=3 SV=1	FALSE	43.656	37	5	16	5	128	14	6.58	38.43	5	1
High	Master Protein	extdb	DNA-binding protein HU-beta [Escherichia coli]	FALSE	43.43	52	4	16	4	90	9.2	9.7	40.87	4	1
High	Master Protein	A0A0D8W5G8	Sulfurtransferase OS=Escherichia coli OX=562 GN=D9D31_03440 PE=4 SV=1	FALSE	43.372	19	7	16	1	435	48.3	6.81	38.92	7	1
High	Master Protein	A0A1X3LK76	2-dehydro-3-deoxy-phosphogluconate aldolase OS=Escherichia coli TA054 OX=656433 GN=EAXG_01372 PE=3 SV=1	FALSE	43.317	49	6	15	6	213	22.2	5.39	35.15	6	1
High	Master Protein	Q6VMV4	Flagellin OS=Escherichia coli OX=562 GN=fliC PE=3 SV=1	FALSE	43.165	8	3	33	1	426	44.1	4.6	94.81	3	1
High	Master Protein	F4NH88	Ribose-phosphate pyrophosphokinase OS=Escherichia coli D9 OX=556266 GN=prs PE=3 SV=1	FALSE	43.126	41	10	12	10	337	36.6	5.74	18.51	10	1
High	Master Protein	A0A6D0R0F3	Uroporphyrinogen-III C-methyltransferase OS=Escherichia coli OX=562 GN=hemX PE=4 SV=1	FALSE	42.275	27	9	14	1	393	43	4.75	30.55	9	1
High	Master Protein	A0A7H5D8I1	Major outer membrane lipoprotein Lpp OS=Escherichia coli OX=562 GN=lpp PE=3 SV=1	FALSE	41.413	49	4	38	4	78	8.2	8.79	58.13	4	1
High	Master Protein	extdb	co-chaperone GroES [Escherichia coli]	FALSE	41.338	57	5	18	1	97	10.4	5.24	33.14	5	1
High	Master Protein	A0A6M0PC40	Adenylate kinase OS=Escherichia coli OX=562 GN=adk PE=3 SV=1	FALSE	41.296	41	8	17	8	214	23.5	5.74	29.1	8	1
High	Master Protein	A0A0K3ZUX7	Copper homeostasis protein (Lipoprotein nlpE) OS=Escherichia coli OX=562 GN=cutF PE=4 SV=1	FALSE	41.245	29	6	17	6	236	25.8	5.2	35.03	6	1
High	Master Protein	A0A7U9B4S0	Phosphoheptose isomerase OS=Escherichia coli TA143 OX=656437 GN=ECMG_01349 PE=4 SV=1	FALSE	40.957	54	8	16	8	192	20.8	6.42	31.74	8	1
High	Master Protein	A0A7L5HT94	Peroxiredoxin OsmC OS=Escherichia coli OX=562 GN=osmC PE=4 SV=1	FALSE	40.929	55	6	14	6	143	15.1	5.86	25.99	6	1
High	Master Protein	H4LBB9	Thiol peroxidase OS=Escherichia coli DEC2E OX=868142 GN=tpx PE=3 SV=1	FALSE	40.918	48	5	8	5	168	17.8	5.24	22.95	5	1
High	Master Protein	D6IED7	50S ribosomal protein L13 OS=Escherichia coli B185 OX=550676 GN=rplM PE=3 SV=1	FALSE	40.814	28	4	18	4	167	18.8	9.66	35.06	4	1
High	Master Protein	A0A3W2ZKX4	ATP synthase subunit delta OS=Escherichia coli OX=562 GN=atpH PE=3 SV=1	FALSE	40.808	38	5	7	5	177	19.4	5.02	24.11	5	1
High	Master Protein	D3Y2X0	Cold shock-like protein OS=Escherichia coli OX=562 GN=cspC PE=4 SV=1	FALSE	40.547	72	4	20	3	69	7.4	7.24	55.14	4	1
High	Master Protein	A0A3W5Y4Y7	30S ribosomal protein S4 OS=Escherichia coli OX=562 GN=rpsD PE=3 SV=1	FALSE	40.035	51	9	12	1	206	23.5	10.05	23.77	9	1
High	Master Protein	A0A376JAH4	Phosphate starvation-inducible protein OS=Escherichia coli OX=562 GN=psiF PE=4 SV=1	FALSE	39.764	54	6	21	6	106	11.6	9.88	36.65	6	1
High	Master Protein	A0A4D1KFF6	Lipoprotein OS=Escherichia coli OX=562 GN=ygdI PE=4 SV=1	FALSE	39.75	47	3	32	2	75	8.2	5.97	50.17	3	1
High	Master Protein	A0A3W5XVL0	Fructose-bisphosphate aldolase OS=Escherichia coli OX=562 GN=EAN77_06185 PE=3 SV=1	FALSE	39.276	29	6	8	6	359	39.2	5.86	19.21	6	1
High	Master Protein	A0A2D0NLL4	Chaperone protein Skp OS=Escherichia coli O127:H6 OX=168807 GN=skp PE=3 SV=1	FALSE	39.209	54	6	28	2	133	14.9	9.7	46.76	6	1
High	Master Protein	A0A5F1DZ58	Osmotically-inducible lipoprotein OsmE OS=Escherichia coli OX=562 GN=osmE PE=4 SV=1	FALSE	39.179	67	5	21	1	112	12	7.87	43.64	5	1
High	Master Protein	A0A0K3YW62	Hydrogenase-2 large subunit OS=Escherichia coli OX=562 GN=hybC PE=3 SV=1	FALSE	39.14	18	7	10	7	567	62.5	6.28	23.67	7	1
High	Master Protein	A0A454RLU9	50S ribosomal protein L15 OS=Escherichia coli OX=562 GN=rplO PE=3 SV=1	FALSE	38.98	48	6	11	6	144	15	11.18	23.39	6	1
High	Master Protein	A0A0P7MQR8	Uncharacterized protein OS=Escherichia coli OX=562 GN=BvCmsNSP006_01995 PE=4 SV=1	FALSE	38.676	76	6	15	6	83	9.5	7.33	39.13	6	1
High	Master Protein	A0A4Y8H1W5	Protein YebF OS=Escherichia coli OX=562 GN=yebF PE=3 SV=1	FALSE	38.58	39	3	7	3	118	12.9	8.9	17.36	3	1
High	Master Protein	E1IKT7	4Fe-4S binding domain protein OS=Escherichia coli MS 145-7 OX=679204 GN=HMPREF9348_00720 PE=4 SV=1	FALSE	38.314	40	9	12	9	289	32.1	6.81	21.04	9	1
High	Master Protein	A0A7J4WQ05	Osmotically-inducible lipoprotein OsmB OS=Escherichia coli OX=562 GN=osmB PE=4 SV=1	FALSE	38.175	56	1	3	1	72	6.9	9.74	19.02	1	1
High	Master Protein	A0A2D0P0D6	Superoxide dismutase OS=Escherichia coli O127:H6 OX=168807 GN=sodA PE=3 SV=1	FALSE	38.081	45	6	8	6	206	23.1	6.96	20.46	6	1
High	Master Protein	A0A5E9S917	DUF2884 family protein OS=Escherichia coli OX=562 GN=E2135_03970 PE=4 SV=1	FALSE	37.869	38	7	13	7	239	26.4	9.19	27.55	7	1
High	Master Protein	A0A7I8YRG7	Phosphoglucosamine mutase OS=Escherichia coli OX=562 GN=glmM PE=3 SV=1	FALSE	37.796	21	7	13	7	445	47.5	5.76	29.25	7	1
High	Master Protein	A0A1X3I376	Periplasmic serine endoprotease DegP-like OS=Escherichia coli M056 OX=656415 GN=EAMG_01663 PE=3 SV=1	FALSE	37.716	24	7	11	1	352	36.5	6.33	22.84	7	1
High	Master Protein	lcl	[locus_tag=EDL933_2092] [protein=hypothetical protein] [protein_id=AIG68280.1] [location=complement(1940472..1940675)] [gbkey=CDS]	FALSE	37.652	79	6	26	6	67	7.3	8.21	57.09	6	1
High	Master Protein	A0A4Q0BWU5	Ribosomal RNA large subunit methyltransferase I OS=Escherichia coli OX=562 GN=rlmI PE=3 SV=1	FALSE	37.11	22	7	10	7	396	44.4	7.77	14.92	7	1
High	Master Protein	V0YFL6	50S ribosomal protein L29 OS=Escherichia coli 908525 OX=1268995 GN=rpmC PE=3 SV=1	FALSE	36.975	46	2	20	2	63	7.3	10.36	46.1	2	1
High	Master Protein	D6JBH6	UPF0033 domain-containing protein OS=Escherichia coli B354 OX=550677 GN=ECEG_01246 PE=3 SV=1	FALSE	36.746	82	4	7	4	77	8.6	4.83	24.4	4	1
High	Master Protein	A0A0F3T837	DUF3251 domain-containing protein OS=Escherichia coli OX=562 GN=yajI PE=4 SV=1	FALSE	36.707	34	4	7	4	179	19.5	6.55	15.58	4	1
High	Master Protein	A0A3Q0P191	Glutaredoxin OS=Escherichia coli OX=562 GN=AJ318_19400 PE=3 SV=1	FALSE	36.703	69	4	14	4	83	9.2	7.24	35.53	4	1
High	Master Protein	A0A0K4IVB5	Anaerobic dimethyl sulfoxide reductase subunit B OS=Escherichia coli OX=562 GN=dmsB_2 PE=4 SV=1	FALSE	36.464	35	7	9	2	205	22.7	6.61	24.03	7	1
High	Master Protein	A0A7S8RKE1	Fe(3+) dicitrate transport protein FecA OS=Escherichia coli OX=562 GN=fecA PE=4 SV=1	FALSE	36.228	17	9	13	9	774	85.2	5.94	25.57	9	1
High	Master Protein	A0A3Y4XTN3	Putrescine-binding periplasmic protein OS=Escherichia coli OX=562 GN=potF PE=3 SV=1	FALSE	35.756	31	8	11	1	353	39.1	5.63	26.84	8	1
High	Master Protein	A0A777WEH7	Copper-exporting P-type ATPase CopA OS=Escherichia coli OX=562 GN=copA PE=3 SV=1	FALSE	35.497	8	3	9	3	833	87.9	5.58	23.36	3	1
High	Master Protein	A0A077K5Q0	30S ribosomal protein S10 OS=Escherichia coli O157 OX=1045010 GN=rpsJ PE=3 SV=1	FALSE	35.479	35	4	13	4	103	11.7	9.32	25.2	4	1
High	Master Protein	D6IBG5	Pyruvate kinase OS=Escherichia coli B185 OX=550676 GN=ECDG_01725 PE=3 SV=1	FALSE	35.462	21	7	7	7	480	51.4	6.9	23.09	7	1
High	Master Protein	lcl	[locus_tag=EDL933_4521] [db_xref=GO:0003735,GO:0005622,GO:0005840,GO:0006412] [protein=LSU ribosomal protein L18p (L5e)] [protein_id=AIG70669.1] [location=complement(4267883..4268236)] [gbkey=CDS]	FALSE	35.13	54	6	17	6	117	12.8	10.42	38.01	6	1
High	Master Protein	A0A0K4GFX6	Periplasmic protein DcrB OS=Escherichia coli OX=562 GN=dcrB PE=4 SV=1	FALSE	34.767	49	7	12	7	185	19.8	5.33	15.32	7	1
High	Master Protein	A0A403NLX1	Glutamate-1-semialdehyde 2,1-aminomutase OS=Escherichia coli OX=562 GN=hemL PE=3 SV=1	FALSE	34.731	21	7	9	7	426	45.3	4.93	22.43	7	1
High	Master Protein	A0A4T9E6E6	Neutral zinc metallopeptidase OS=Escherichia coli OX=562 GN=C9Z78_13230 PE=4 SV=1	FALSE	34.683	39	9	11	1	287	31.4	5.67	19.51	9	1
High	Master Protein	A0A069XGT2	Agmatinase OS=Escherichia coli 3-373-03_S4_C2 OX=1444252 GN=speB PE=3 SV=1	FALSE	34.658	29	6	11	6	306	33.6	5.39	23.52	6	1
High	Master Protein	A0A0K4VVF8	Phosphoenolpyruvate-protein phosphotransferase OS=Escherichia coli OX=562 GN=ptsI PE=3 SV=1	FALSE	34.621	22	9	10	9	575	63.5	4.87	11.55	9	1
High	Master Protein	A0A1X9TN23	Glutaredoxin OS=Escherichia coli OX=562 GN=grxD PE=3 SV=1	FALSE	34.51	46	4	6	4	115	12.9	4.75	22.18	4	1
High	Master Protein	D6HZN7	YpfJ protein OS=Escherichia coli B088 OX=550672 GN=ECCG_00976 PE=4 SV=1	FALSE	34.393	38	9	11	1	287	31.5	6.15	17.03	9	1
High	Master Protein	A0A6L2GFR1	50S ribosomal protein L11 OS=Escherichia coli OX=562 GN=rplK PE=3 SV=1	FALSE	34.184	38	5	19	5	142	14.9	9.63	26.07	5	1
High	Master Protein	A0A1X3JEQ5	Putative cytoplasmic protein OS=Escherichia coli H386 OX=656397 GN=ECVG_00360 PE=3 SV=1	FALSE	34.158	62	4	12	4	102	11.3	4.67	27.36	4	1
High	Master Protein	K4VKM6	RpoE-regulated lipoprotein OS=Escherichia coli O111:H8 str. CVM9634 OX=1165944 GN=ECO9634_03304 PE=4 SV=1	FALSE	34.102	46	6	9	2	188	20.5	5.07	25.94	6	1
High	Master Protein	A0A7D4RJQ9	Uroporphyrinogen-III C-methyltransferase OS=Escherichia coli O10:H32 OX=2603836 GN=hemX PE=4 SV=1	FALSE	33.877	24	9	13	1	405	43.9	4.82	26.6	9	1
High	Master Protein	A0A377CSY9	Nickel ABC transporter, nickel/metallophore periplasmic binding protein OS=Escherichia coli OX=562 GN=nikA PE=3 SV=1	FALSE	33.752	28	10	13	1	524	58.8	6.23	24.45	10	1
High	Master Protein	A0A3T9E839	TIGR00156 family protein OS=Escherichia coli OX=562 GN=DNI21_08095 PE=4 SV=1	FALSE	33.598	51	6	9	6	130	14.1	6.95	21.38	6	1
High	Master Protein	A0A1X3KJE0	Serine-type D-Ala-D-Ala carboxypeptidase OS=Escherichia coli H461 OX=656403 GN=EARG_04233 PE=3 SV=1	FALSE	33.585	23	8	12	8	407	44.5	8.03	19.63	8	1
High	Master Protein	A0A7U8ZVU6	HflB OS=Escherichia coli FVEC1302 OX=656379 GN=ECFG_02289 PE=4 SV=1	FALSE	33.506	16	9	12	9	647	71	6.11	23.75	9	1
High	Master Protein	lcl	[locus_tag=EDL933_3687] [db_xref=GO:0005506,GO:0006118,GO:0009055] [protein=Ferredoxin, 2Fe-2S] [protein_id=AIG69847.1] [location=complement(3464294..3464629)] [gbkey=CDS]	FALSE	33.474	67	5	7	5	111	12.3	4.59	23.01	5	1
High	Master Protein	A0A3R1AGM6	Uridylate kinase OS=Escherichia coli OX=562 GN=pyrH PE=3 SV=1	FALSE	33.425	25	4	7	4	241	26	8.38	14.86	4	1
High	Master Protein	A0A5C8Y264	LPS-assembly lipoprotein LptE OS=Escherichia coli OX=562 GN=lptE PE=3 SV=1	FALSE	33.328	32	5	13	5	193	21.4	8.68	26.64	5	1
High	Master Protein	A0A4C7B620	ABC transporter periplasmic binding protein OS=Escherichia coli OX=562 GN=osmF PE=4 SV=1	FALSE	33.248	29	8	9	8	305	32.5	5.54	22.06	8	1
High	Master Protein	A0A6M0PEW2	50S ribosomal protein L17 OS=Escherichia coli OX=562 GN=rplQ PE=3 SV=1	FALSE	33.029	34	6	26	6	128	14.5	11.05	46.2	6	1
High	Master Protein	A0A0H0GQG2	Cell division protein DamX OS=Escherichia coli OX=562 GN=damX PE=3 SV=1	FALSE	32.987	26	9	13	9	428	46	6.04	25.68	9	1
High	Master Protein	A0A5N3D5X6	Class I fructose-bisphosphate aldolase OS=Escherichia coli OX=562 GN=fbaB PE=4 SV=1	FALSE	32.745	22	6	9	6	350	38.1	6.73	16.71	6	1
High	Master Protein	A0A5N2KM56	L,D-transpeptidase LdtE OS=Escherichia coli OX=562 GN=ldtE PE=3 SV=1	FALSE	32.606	39	7	18	1	334	36	9.41	26.8	7	1
High	Master Protein	A0A0E0U0L3	NADH-quinone oxidoreductase OS=Escherichia coli UMNK88 OX=696406 GN=nuoG PE=3 SV=1	FALSE	32.562	11	7	7	7	908	100.3	6.25	17.86	7	1
High	Master Protein	A0A070SV39	Ribosomal subunit interface protein OS=Escherichia coli 2-210-07_S3_C3 OX=1444180 GN=AC45_0301 PE=4 SV=1	FALSE	32.508	27	2	6	2	95	10.8	7.06	17.31	2	1
High	Master Protein	D6JGR5	Uncharacterized protein OS=Escherichia coli B354 OX=550677 GN=ECEG_04110 PE=4 SV=1	FALSE	32.448	40	4	10	4	120	13.7	9.5	22.44	4	1
High	Master Protein	A0A6N9S442	Uncharacterized protein OS=Escherichia coli OX=562 GN=EPS70_07770 PE=4 SV=1	FALSE	32.394	48	4	13	4	120	13.3	9.99	18.3	4	1
High	Master Protein	A0A0E1LHR3	Periplasmic chaperone protein FimC OS=Escherichia coli OX=562 GN=fimC PE=3 SV=1	FALSE	32.309	51	7	8	7	218	24.1	9.38	19.09	7	1
High	Master Protein	A0A376TTX9	Sigma-E factor regulatory protein OS=Escherichia coli OX=562 GN=rseB PE=3 SV=1	FALSE	32.29	17	5	11	1	535	60.2	6.48	23.73	5	1
High	Master Protein	D9Z4U4	TraT complement resistance protein OS=Escherichia coli OX=562 GN=traT PE=3 SV=1	FALSE	32.285	28	6	9	2	251	26.9	9.33	14.84	6	1
High	Master Protein	D7XCZ2	ATP-dependent Clp protease proteolytic subunit OS=Escherichia coli MS 198-1 OX=749549 GN=clpP PE=3 SV=1	FALSE	32.226	38	4	6	4	194	21.7	5.82	15.36	4	1
High	Master Protein	A0A6M0PFH3	Peptidyl-prolyl cis-trans isomerase OS=Escherichia coli OX=562 GN=ppiA PE=3 SV=1	FALSE	31.989	34	5	12	1	190	20.3	8.94	27.81	5	1
High	Master Protein	D3QJP5	Uncharacterized protein OS=Escherichia coli O55:H7 (strain CB9615 / EPEC) OX=701177 GN=yohN PE=4 SV=1	FALSE	31.95	40	5	12	5	172	19.3	7.21	23.48	5	1
High	Master Protein	A0A4S1W8J4	ABC transporter periplasmic binding protein OS=Escherichia coli OX=562 GN=ydcS PE=3 SV=1	FALSE	31.914	33	9	11	9	381	42.3	7.42	20.2	9	1
High	Master Protein	D6J606	RNA polymerase-binding transcription factor DksA OS=Escherichia coli B354 OX=550677 GN=dksA PE=3 SV=1	FALSE	31.856	32	4	13	4	157	18.3	5.36	28.3	4	1
High	Master Protein	U9XQA4	Blue copper oxidase CueO OS=Escherichia coli 113303 OX=1268978 GN=HMPREF1591_02708 PE=4 SV=1	FALSE	31.751	16	5	6	5	516	56.6	6.79	18.74	5	1
High	Master Protein	A0A6D2FHT2	LysM peptidoglycan-binding domain-containing protein OS=Escherichia coli OX=562 GN=D4M70_08050 PE=3 SV=1	FALSE	31.583	39	7	17	1	334	36	9.41	33.07	7	1
High	Master Protein	A0A3U1V7R9	Inositol-1-monophosphatase OS=Escherichia coli OX=562 GN=DOT59_09485 PE=3 SV=1	FALSE	31.575	42	9	12	9	267	29.1	6.96	26.53	9	1
High	Master Protein	D6I1Y9	30S ribosomal protein S13p/S18e OS=Escherichia coli B088 OX=550672 GN=ECCG_03705 PE=3 SV=1	FALSE	31.091	52	5	9	1	85	9.6	10.67	23.94	5	1
High	Master Protein	A0A781XBA3	DUF406 domain-containing protein OS=Escherichia coli OX=562 GN=HH460_002997 PE=3 SV=1	FALSE	31.036	45	3	9	3	99	10.7	4.68	20.14	3	1
High	Master Protein	A7ZMV3	C-terminal processing peptidase OS=Escherichia coli O139:H28 (strain E24377A / ETEC) OX=331111 GN=prc PE=3 SV=1	FALSE	31.009	13	8	11	8	682	76.5	7.09	20.51	8	1
High	Master Protein	extdb	serum resistance lipoprotein Bor [Escherichia coli]	FALSE	30.839	33	3	23	3	97	10.4	9.22	38.51	3	1
High	Master Protein	A0A780FIB0	50S ribosomal protein L21 OS=Escherichia coli OX=562 GN=rplU PE=3 SV=1	FALSE	30.466	52	4	11	4	103	11.5	9.7	28.65	4	1
High	Master Protein	lcl	[locus_tag=EDL933_0755] [db_xref=GO:0003700] [protein=Ferric uptake regulation protein FUR] [protein_id=AIG66957.1] [location=complement(790001..790447)] [gbkey=CDS]	FALSE	30.436	44	6	10	6	148	16.8	6.11	21.95	6	1
High	Master Protein	A0A0H3JD81	Soluble cytochrome b562 (Fragment) OS=Escherichia coli O157:H7 OX=83334 PE=3 SV=1	FALSE	30.415	42	5	13	5	113	12.8	4.88	30.21	5	1
High	Master Protein	A0A6M9RUW1	Two-component system QseEF-associated lipoprotein QseG OS=Escherichia coli OX=562 GN=qseG PE=4 SV=1	FALSE	30.281	29	5	6	5	237	27.3	6.54	13.57	5	1
High	Master Protein	D3H492	Pyruvate dehydrogenase E1 component OS=Escherichia coli O44:H18 (strain 042 / EAEC) OX=216592 GN=aceE PE=4 SV=1	FALSE	30.241	12	10	10	10	887	99.6	5.68	15.86	10	1
High	Master Protein	A0A6M0PWP9	Nucleoside-specific channel-forming protein Tsx OS=Escherichia coli OX=562 GN=G4V03_12435 PE=3 SV=1	FALSE	30.215	14	3	9	1	294	33.6	5.45	21.07	3	1
High	Master Protein	A0A7D4R6E5	Potassium binding protein Kbp OS=Escherichia coli O10:H32 OX=2603836 GN=kbp PE=4 SV=1	FALSE	30.19	54	7	9	7	149	16.1	6	16.1	7	1
High	Master Protein	Q6JZI0	Isocitrate dehydrogenase [NADP] (Fragment) OS=Escherichia coli OX=562 GN=icd PE=4 SV=1	FALSE	30.16	23	7	9	7	389	42.8	5.22	24.35	7	1
[truncated: 654 more rows]

## Sheet: Table S4
Protein FDR Confidence: Combined	Master	Accession	Description	Contaminant	Marked as	Sum PEP Score	Coverage [%]	# Peptides	# PSMs	# Unique Peptides	# AAs	MW [kDa]	calc. pI	Score Sequest HT: Sequest HT	Abundance Ratio: (Souche 1 EDL933) / (Souche 2 21765)	Abundance Ratio: (Souche 1 EDL933) / (Souche 3 PMK5)	Abundance Ratio: (Souche 2 21765) / (Souche 3 PMK5)	Abundance Ratio (log2): (Souche 1 EDL933) / (Souche 2 21765)	Abundance Ratio (log2): (Souche 1 EDL933) / (Souche 3 PMK5)	Abundance Ratio (log2): (Souche 2 21765) / (Souche 3 PMK5)	Abundance Ratio P-Value: (Souche 1 EDL933) / (Souche 2 21765)	Abundance Ratio P-Value: (Souche 1 EDL933) / (Souche 3 PMK5)	Abundance Ratio P-Value: (Souche 2 21765) / (Souche 3 PMK5)	Abundance Ratio Adj. P-Value: (Souche 1 EDL933) / (Souche 2 21765)	Abundance Ratio Adj. P-Value: (Souche 1 EDL933) / (Souche 3 PMK5)	Abundance Ratio Adj. P-Value: (Souche 2 21765) / (Souche 3 PMK5)	Abundances (Grouped): Souche 1 EDL933	Abundances (Grouped): Souche 2 21765	Abundances (Grouped): Souche 3 PMK5	Found in Sample: [S1] F1: 126, Sample, Souche 1 EDL933	Found in Sample: [S4] F1: 127N, Sample, Souche 1 EDL933	Found in Sample: [S5] F1: 127C, Sample, Souche 1 EDL933	Found in Sample: [S2] F2: 126, Sample, Souche 1 EDL933	Found in Sample: [S12] F2: 127N, Sample, Souche 1 EDL933	Found in Sample: [S13] F2: 127C, Sample, Souche 1 EDL933	Found in Sample: [S3] F3: 126, Sample, Souche 1 EDL933	Found in Sample: [S20] F3: 127N, Sample, Souche 1 EDL933	Found in Sample: [S21] F3: 127C, Sample, Souche 1 EDL933	Found in Sample: [S6] F1: 128N, Sample, Souche 2 21765	Found in Sample: [S7] F1: 128C, Sample, Souche 2 21765	Found in Sample: [S8] F1: 129N, Sample, Souche 2 21765	Found in Sample: [S14] F2: 128N, Sample, Souche 2 21765	Found in Sample: [S15] F2: 128C, Sample, Souche 2 21765	Found in Sample: [S16] F2: 129N, Sample, Souche 2 21765	Found in Sample: [S22] F3: 128N, Sample, Souche 2 21765	Found in Sample: [S23] F3: 128C, Sample, Souche 2 21765	Found in Sample: [S24] F3: 129N, Sample, Souche 2 21765	Found in Sample: [S9] F1: 129C, Sample, Souche 3 PMK5	Found in Sample: [S10] F1: 130N, Sample, Souche 3 PMK5
[truncated: 1,192 more rows]
[truncated: 7 more columns]

[truncated: 1 more sheets: Table S5]
